# Supplementary material
Source: publisher figshare collection journal article supplement (https://acs.figshare.com/ndownloader/files/3727732)
Supplement: Supplementary file 1 [file 3727732]

 
data_4e 
  
_audit_creation_method            SHELXL-2014/6 
_chemical_name_systematic         ? 
_chemical_name_common             ? 
_chemical_melting_point           ? 
_chemical_formula_moiety          
 'C32 H30 Cl2 N6 Ni, 2(C2 H4 Cl2)'  
_chemical_formula_sum 
 'C36 H38 Cl6 N6 Ni' 
_chemical_formula_weight          826.13 
  
loop_ 
 _atom_type_symbol 
 _atom_type_description 
 _atom_type_scat_dispersion_real 
 _atom_type_scat_dispersion_imag 
 _atom_type_scat_source 
 'C'  'C'   0.0033   0.0016 
 'International Tables Vol C Tables 4.2.6.8 and 6.1.1.4' 
 'H'  'H'   0.0000   0.0000 
 'International Tables Vol C Tables 4.2.6.8 and 6.1.1.4' 
 'N'  'N'   0.0061   0.0033 
 'International Tables Vol C Tables 4.2.6.8 and 6.1.1.4' 
 'Cl'  'Cl'   0.1484   0.1585 
 'International Tables Vol C Tables 4.2.6.8 and 6.1.1.4' 
 'Ni'  'Ni'   0.3393   1.1124 
 'International Tables Vol C Tables 4.2.6.8 and 6.1.1.4' 
  
_space_group_crystal_system       monoclinic 
_space_group_IT_number            12 
_space_group_name_H-M_alt         'C 2/m' 
_space_group_name_Hall            '-C 2y' 
  
_shelx_space_group_comment 
; 
The symmetry employed for this shelxl refinement is uniquely defined 
by the following loop, which should always be used as a source of 
symmetry information in preference to the above space-group names. 
They are only intended as comments. 
; 
  
loop_ 
 _space_group_symop_operation_xyz 
 'x, y, z' 
 '-x, y, -z' 
 'x+1/2, y+1/2, z' 
 '-x+1/2, y+1/2, -z' 
 '-x, -y, -z' 
 'x, -y, z' 
 '-x+1/2, -y+1/2, -z' 
 'x+1/2, -y+1/2, z' 
  
_cell_length_a                    11.342(6) 
_cell_length_b                    11.293(6) 
_cell_length_c                    15.324(7) 
_cell_angle_alpha                 90 
_cell_angle_beta                  102.236(8) 
_cell_angle_gamma                 90 
_cell_volume                      1918.1(16) 
_cell_formula_units_Z             2 
_cell_measurement_temperature     100(2) 
_cell_measurement_reflns_used     1057 
_cell_measurement_theta_min       2.57 
_cell_measurement_theta_max       24.72 
  
_exptl_crystal_description        plate 
_exptl_crystal_colour             orange 
_exptl_crystal_density_meas       ? 
_exptl_crystal_density_method     ? 
_exptl_crystal_density_diffrn     1.430 
_exptl_crystal_F_000              852 
_exptl_transmission_factor_min    ? 
_exptl_transmission_factor_max    ? 
_exptl_crystal_size_max           0.300 
_exptl_crystal_size_mid           0.240 
_exptl_crystal_size_min           0.030 
_exptl_absorpt_coefficient_mu     0.959 
_shelx_estimated_absorpt_T_min    0.762 
_shelx_estimated_absorpt_T_max    0.972 
_exptl_absorpt_correction_type    'multi-scan' 
_exptl_absorpt_correction_T_min   0.768 
_exptl_absorpt_correction_T_max   0.968 
_exptl_absorpt_process_details    'SADABS (Bruker, 2003)' 
_exptl_absorpt_special_details    ? 
_diffrn_ambient_temperature       100(2) 
_diffrn_radiation_wavelength      0.71073 
_diffrn_radiation_type            MoK\a 
_diffrn_source                    ? 
_diffrn_measurement_device_type   'Bruker APEX-II CCD' 
_diffrn_measurement_method        '\f and \w scans' 
_diffrn_detector_area_resol_mean  ? 
_diffrn_reflns_number             10212 
_diffrn_reflns_av_unetI/netI      0.0757 
_diffrn_reflns_av_R_equivalents   0.0919 
_diffrn_reflns_limit_h_min        -14 
_diffrn_reflns_limit_h_max        14 
_diffrn_reflns_limit_k_min        -14 
_diffrn_reflns_limit_k_max        14 
_diffrn_reflns_limit_l_min        -19 
_diffrn_reflns_limit_l_max        19 
_diffrn_reflns_theta_min          1.360 
_diffrn_reflns_theta_max          27.580 
_diffrn_reflns_theta_full         25.242 
_diffrn_measured_fraction_theta_max   0.994 
_diffrn_measured_fraction_theta_full  1.000 
_diffrn_reflns_Laue_measured_fraction_max    0.994 
_diffrn_reflns_Laue_measured_fraction_full   1.000 
_diffrn_reflns_point_group_measured_fraction_max   0.994 
_diffrn_reflns_point_group_measured_fraction_full  1.000 
_reflns_number_total              2326 
_reflns_number_gt                 1450 
_reflns_threshold_expression      'I > 2\s(I)' 
_reflns_Friedel_coverage          0.000 
_reflns_Friedel_fraction_max      . 
_reflns_Friedel_fraction_full     . 
  
_reflns_special_details 
; 
 Reflections were merged by SHELXL according to the crystal 
 class for the calculation of statistics and refinement. 
  
 _reflns_Friedel_fraction is defined as the number of unique 
 Friedel pairs measured divided by the number that would be 
 possible theoretically, ignoring centric projections and 
 systematic absences. 
; 
  
_computing_data_collection        'Bruker APEX2' 
_computing_cell_refinement        'Bruker SAINT' 
_computing_data_reduction         'Bruker SAINT' 
_computing_structure_solution     'SHELXS-97 (Sheldrick 2008)' 
_computing_structure_refinement   'SHELXL-2014/6 (Sheldrick, 2014)' 
_computing_molecular_graphics     'Bruker SHELXTL' 
_computing_publication_material   'Bruker SHELXTL' 
_refine_special_details           ? 
_refine_ls_structure_factor_coef  Fsqd 
_refine_ls_matrix_type            full 
_refine_ls_weighting_scheme       calc 
_refine_ls_weighting_details 
'w=1/[\s^2^(Fo^2^)+(0.0713P)^2^+14.2181P] where P=(Fo^2^+2Fc^2^)/3' 
_atom_sites_solution_primary      ? 
_atom_sites_solution_secondary    ? 
_atom_sites_solution_hydrogens    mixed 
_refine_ls_hydrogen_treatment     constr 
_refine_ls_extinction_method      none 
_refine_ls_extinction_coef        . 
_refine_ls_number_reflns          2326 
_refine_ls_number_parameters      127 
_refine_ls_number_restraints      8 
_refine_ls_R_factor_all           0.1307 
_refine_ls_R_factor_gt            0.0783 
_refine_ls_wR_factor_ref          0.1997 
_refine_ls_wR_factor_gt           0.1730 
_refine_ls_goodness_of_fit_ref    1.039 
_refine_ls_restrained_S_all       1.038 
_refine_ls_shift/su_max           0.001 
_refine_ls_shift/su_mean          0.001 
  
loop_ 
 _atom_site_label 
 _atom_site_type_symbol 
 _atom_site_fract_x 
 _atom_site_fract_y 
 _atom_site_fract_z 
 _atom_site_U_iso_or_equiv 
 _atom_site_adp_type 
 _atom_site_occupancy 
 _atom_site_site_symmetry_order 
 _atom_site_calc_flag 
 _atom_site_refinement_flags_posn 
 _atom_site_refinement_flags_adp 
 _atom_site_refinement_flags_occupancy 
 _atom_site_disorder_assembly 
 _atom_site_disorder_group 
Ni1 Ni 0.5000 0.0000 0.5000 0.0341(4) Uani 1 4 d S T P . . 
Cl1 Cl 0.68593(14) 0.0000 0.57795(11) 0.0341(5) Uani 1 2 d S T P . . 
N1 N 0.5604(4) 0.2442(4) 0.4562(3) 0.0348(11) Uani 1 1 d D . . . . 
C2 C 0.5000 0.1700(7) 0.5000 0.0332(18) Uani 1 2 d S T P A . 
C3 C 0.532(8) 0.359(3) 0.473(6) 0.038(3) Uani 0.5 1 d D . P A 1 
H3 H 0.5585 0.4274 0.4469 0.046 Uiso 0.5 1 calc R U P A 1 
N3 N 0.541(6) 0.3612(17) 0.473(5) 0.038(3) Uani 0.5 1 d D . P A 2 
C4 C 0.6399(4) 0.2141(6) 0.3956(3) 0.0395(13) Uani 1 1 d . . . . . 
H4A H 0.6678 0.1314 0.4067 0.047 Uiso 1 1 calc R U . . . 
H4B H 0.7117 0.2662 0.4084 0.047 Uiso 1 1 calc R U . . . 
C5 C 0.5779(4) 0.2273(5) 0.2978(3) 0.0344(12) Uani 1 1 d . . . . . 
C6 C 0.4775(6) 0.1621(7) 0.2620(4) 0.058(2) Uani 1 1 d . . . . . 
H6 H 0.4433 0.1111 0.2993 0.070 Uiso 1 1 calc R U . . . 
C7 C 0.4257(7) 0.1698(9) 0.1726(4) 0.081(3) Uani 1 1 d . . . . . 
H7 H 0.3565 0.1234 0.1487 0.097 Uiso 1 1 calc R U . . . 
C8 C 0.4722(6) 0.2433(8) 0.1175(4) 0.068(2) Uani 1 1 d . . . . . 
H8 H 0.4363 0.2480 0.0557 0.082 Uiso 1 1 calc R U . . . 
C9 C 0.5703(7) 0.3090(8) 0.1526(4) 0.080(3) Uani 1 1 d . . . . . 
H9 H 0.6030 0.3614 0.1154 0.096 Uiso 1 1 calc R U . . . 
C10 C 0.6240(6) 0.3008(8) 0.2430(4) 0.075(3) Uani 1 1 d . . . . . 
H10 H 0.6935 0.3469 0.2666 0.090 Uiso 1 1 calc R U . . . 
Cl2 Cl 0.178(4) 0.0000 0.6908(9) 0.0604(7) Uani 0.5 2 d DS T P B 1 
Cl3 Cl 0.2951(4) 0.0000 0.9731(4) 0.0604(7) Uani 0.5 2 d DS T P B 1 
C11 C 0.2659(18) 0.0000 0.8002(11) 0.131(7) Uani 0.5 2 d DS T P B 1 
H11A H 0.3185 -0.0709 0.8083 0.157 Uiso 0.5 1 d R U P B 1 
C12 C 0.1885(13) 0.0000 0.8712(7) 0.131(7) Uani 0.5 2 d DS T P B 1 
H12A H 0.1367 -0.0714 0.8659 0.157 Uiso 0.5 1 d R U P B 1 
Cl2' Cl 0.180(4) 0.0000 0.6864(9) 0.0604(7) Uani 0.5 2 d DS T P C 2 
Cl3' Cl 0.2533(4) 0.0000 0.9755(4) 0.0604(7) Uani 0.5 2 d DS T P C 2 
C11' C 0.1697(17) 0.0000 0.7992(12) 0.131(7) Uani 0.5 2 d DS T P C 2 
H11B H 0.1226 -0.0706 0.8092 0.157 Uiso 0.5 1 d R U P C 2 
C12' C 0.2889(15) 0.0000 0.8690(6) 0.131(7) Uani 0.5 2 d DS T P C 2 
H12B H 0.3369 -0.0711 0.8616 0.157 Uiso 0.5 1 d R U P C 2 
  
loop_ 
 _atom_site_aniso_label 
 _atom_site_aniso_U_11 
 _atom_site_aniso_U_22 
 _atom_site_aniso_U_33 
 _atom_site_aniso_U_23 
 _atom_site_aniso_U_13 
 _atom_site_aniso_U_12 
Ni1 0.0188(6) 0.0589(10) 0.0212(6) 0.000 -0.0034(5) 0.000 
Cl1 0.0160(7) 0.0588(13) 0.0236(8) 0.000 -0.0045(6) 0.000 
N1 0.026(2) 0.055(3) 0.0198(19) 0.0041(19) -0.0046(15) 0.002(2) 
C2 0.021(3) 0.060(5) 0.014(3) 0.000 -0.005(2) 0.000 
C3 0.028(8) 0.060(4) 0.024(2) 0.006(2) -0.002(4) -0.003(3) 
N3 0.028(8) 0.060(4) 0.024(2) 0.006(2) -0.002(4) -0.003(3) 
C4 0.028(3) 0.061(4) 0.028(3) 0.007(3) 0.002(2) 0.004(2) 
C5 0.028(3) 0.050(4) 0.022(2) 0.004(2) 0.0001(19) -0.003(2) 
C6 0.070(4) 0.076(5) 0.027(3) -0.003(3) 0.007(3) -0.041(4) 
C7 0.068(5) 0.141(8) 0.027(3) -0.008(4) -0.003(3) -0.059(5) 
C8 0.050(4) 0.124(7) 0.024(3) 0.006(4) -0.006(3) -0.029(4) 
C9 0.079(5) 0.125(7) 0.030(3) 0.025(4) -0.003(3) -0.053(5) 
C10 0.056(4) 0.134(7) 0.027(3) 0.015(4) -0.008(3) -0.056(5) 
Cl2 0.0413(12) 0.1101(17) 0.0261(9) 0.000 -0.0015(15) 0.000 
Cl3 0.0413(12) 0.1101(17) 0.0261(9) 0.000 -0.0015(15) 0.000 
C11 0.051(7) 0.27(2) 0.061(7) 0.000 -0.004(8) 0.000 
C12 0.051(7) 0.27(2) 0.061(7) 0.000 -0.004(8) 0.000 
Cl2' 0.0413(12) 0.1101(17) 0.0261(9) 0.000 -0.0015(15) 0.000 
Cl3' 0.0413(12) 0.1101(17) 0.0261(9) 0.000 -0.0015(15) 0.000 
C11' 0.051(7) 0.27(2) 0.061(7) 0.000 -0.004(8) 0.000 
C12' 0.051(7) 0.27(2) 0.061(7) 0.000 -0.004(8) 0.000 
  
_geom_special_details 
; 
 All esds (except the esd in the dihedral angle between two l.s. planes) 
 are estimated using the full covariance matrix.  The cell esds are taken 
 into account individually in the estimation of esds in distances, angles 
 and torsion angles; correlations between esds in cell parameters are only 
 used when they are defined by crystal symmetry.  An approximate (isotropic) 
 treatment of cell esds is used for estimating esds involving l.s. planes. 
; 
  
loop_ 
 _geom_bond_atom_site_label_1 
 _geom_bond_atom_site_label_2 
 _geom_bond_distance 
 _geom_bond_site_symmetry_2 
 _geom_bond_publ_flag 
Ni1 C2 1.919(8) . ? 
Ni1 Cl1 2.1922(17) . ? 
N1 C2 1.349(7) . ? 
N1 C3 1.373(3) . ? 
N1 N3 1.373(3) . ? 
N1 C4 1.464(6) . ? 
C3 H3 0.9500 . ? 
C3 N3 1.287(7) 2_656 ? 
C4 C5 1.521(6) . ? 
C4 H4A 0.9900 . ? 
C4 H4B 0.9900 . ? 
C5 C10 1.361(8) . ? 
C5 C6 1.370(8) . ? 
C6 C7 1.375(8) . ? 
C6 H6 0.9500 . ? 
C7 C8 1.367(10) . ? 
C7 H7 0.9500 . ? 
C8 C9 1.351(9) . ? 
C8 H8 0.9500 . ? 
C9 C10 1.393(8) . ? 
C9 H9 0.9500 . ? 
C10 H10 0.9500 . ? 
Cl2 C11 1.760(3) . ? 
Cl3 C12 1.761(3) . ? 
C11 C12 1.537(3) . ? 
C11 H11A 0.9900 . ? 
C12 H12A 0.9899 . ? 
Cl2' C11' 1.758(3) . ? 
Cl3' C12' 1.761(3) . ? 
C11' C12' 1.536(3) . ? 
C11' H11B 0.9900 . ? 
C12' H12B 0.9901 . ? 
  
loop_ 
 _geom_angle_atom_site_label_1 
 _geom_angle_atom_site_label_2 
 _geom_angle_atom_site_label_3 
 _geom_angle 
 _geom_angle_site_symmetry_1 
 _geom_angle_site_symmetry_3 
 _geom_angle_publ_flag 
C2 Ni1 Cl1 90.000(1) . . ? 
C2 N1 C3 109(4) . . ? 
C2 N1 N3 113(3) . . ? 
C2 N1 C4 128.1(5) . . ? 
C3 N1 C4 123(4) . . ? 
N3 N1 C4 119(3) . . ? 
N1 C2 N1 103.1(7) 2_656 . ? 
N1 C2 Ni1 128.5(3) 2_656 . ? 
N1 C2 Ni1 128.5(3) . . ? 
N1 C3 H3 125.4 . . ? 
N1 C4 C5 112.6(4) . . ? 
N1 C4 H4A 109.1 . . ? 
C5 C4 H4A 109.1 . . ? 
N1 C4 H4B 109.1 . . ? 
C5 C4 H4B 109.1 . . ? 
H4A C4 H4B 107.8 . . ? 
C10 C5 C6 118.4(5) . . ? 
C10 C5 C4 120.6(5) . . ? 
C6 C5 C4 120.9(5) . . ? 
C5 C6 C7 120.6(6) . . ? 
C5 C6 H6 119.7 . . ? 
C7 C6 H6 119.7 . . ? 
C8 C7 C6 121.0(6) . . ? 
C8 C7 H7 119.5 . . ? 
C6 C7 H7 119.5 . . ? 
C9 C8 C7 118.7(5) . . ? 
C9 C8 H8 120.6 . . ? 
C7 C8 H8 120.6 . . ? 
C8 C9 C10 120.6(6) . . ? 
C8 C9 H9 119.7 . . ? 
C10 C9 H9 119.7 . . ? 
C5 C10 C9 120.7(6) . . ? 
C5 C10 H10 119.7 . . ? 
C9 C10 H10 119.7 . . ? 
C12 C11 Cl2 112.4(15) . . ? 
C12 C11 H11A 109.3 . . ? 
Cl2 C11 H11A 108.9 . . ? 
C11 C12 Cl3 103.9(9) . . ? 
C11 C12 H12A 111.0 . . ? 
Cl3 C12 H12A 110.9 . . ? 
C12' C11' Cl2' 116.8(13) . . ? 
C12' C11' H11B 108.4 . . ? 
Cl2' C11' H11B 107.7 . . ? 
C11' C12' Cl3' 107.8(12) . . ? 
C11' C12' H12B 110.1 . . ? 
Cl3' C12' H12B 110.2 . . ? 
  
loop_ 
 _geom_torsion_atom_site_label_1 
 _geom_torsion_atom_site_label_2 
 _geom_torsion_atom_site_label_3 
 _geom_torsion_atom_site_label_4 
 _geom_torsion 
 _geom_torsion_site_symmetry_1 
 _geom_torsion_site_symmetry_2 
 _geom_torsion_site_symmetry_3 
 _geom_torsion_site_symmetry_4 
 _geom_torsion_publ_flag 
C2 N1 C4 C5 100.9(5) . . . . ? 
N1 C4 C5 C10 122.1(7) . . . . ? 
N1 C4 C5 C6 -60.6(8) . . . . ? 
C10 C5 C6 C7 0.8(12) . . . . ? 
C4 C5 C6 C7 -176.5(7) . . . . ? 
C5 C6 C7 C8 -0.6(14) . . . . ? 
C6 C7 C8 C9 -0.3(15) . . . . ? 
C7 C8 C9 C10 0.9(15) . . . . ? 
C6 C5 C10 C9 -0.2(12) . . . . ? 
C4 C5 C10 C9 177.2(7) . . . . ? 
C8 C9 C10 C5 -0.7(15) . . . . ? 
  
_refine_diff_density_max    1.006 
_refine_diff_density_min   -0.651 
_refine_diff_density_rms    0.105 
  
_shelxl_version_number 2014/6 
  
_shelx_res_file 
; 
  
TITL 4e in C2/m 
CELL  0.71073  11.3416  11.2930  15.3240   90.000  102.236   90.000 
ZERR    2.000   0.0057   0.0056   0.0074    0.000    0.008    0.000 
LATT  7 
SYMM -X, Y, -Z 
SFAC C H N CL NI 
UNIT 72 76 12 12 2 
TEMP -173.0 
SIZE 0.03 0.24 0.30 
  
L.S. 8 
BOND $H 
ACTA 
CONF 
  
WGHT    0.071300   14.218101 
FVAR       0.42218   0.53648   0.36059   0.47328 
NI1   5    0.500000    0.000000    0.500000    10.25000    0.01881    0.05891 = 
         0.02121    0.00000   -0.00339    0.00000 
CL1   4    0.685930    0.000000    0.577947    10.50000    0.01597    0.05880 = 
         0.02361    0.00000   -0.00447    0.00000 
N1    3    0.560410    0.244247    0.456153    11.00000    0.02559    0.05495 = 
         0.01975    0.00415   -0.00457    0.00225 
C2    1    0.500000    0.169952    0.500000    10.50000    0.02140    0.05961 = 
         0.01443    0.00000   -0.00526    0.00000 
PART   1 
C3    1    0.531987    0.358958    0.473174    10.50000    0.02815    0.05986 = 
         0.02398    0.00587   -0.00189   -0.00336 
AFIX  43 
H3    2    0.558498    0.427450    0.446872    10.50000   -1.20000 
AFIX   0 
PART   2 
N3    3    0.540770    0.361178    0.473192    10.50000    0.02815    0.05986 = 
         0.02398    0.00587   -0.00189   -0.00336 
PART   0 
C4    1    0.639863    0.214142    0.395556    11.00000    0.02809    0.06078 = 
         0.02781    0.00664    0.00150    0.00361 
AFIX  23 
H4A   2    0.667814    0.131393    0.406736    11.00000   -1.20000 
H4B   2    0.711697    0.266197    0.408420    11.00000   -1.20000 
AFIX   0 
C5    1    0.577926    0.227315    0.297835    11.00000    0.02827    0.05020 = 
         0.02249    0.00409    0.00008   -0.00291 
C6    1    0.477486    0.162112    0.262015    11.00000    0.07000    0.07552 = 
         0.02741   -0.00273    0.00710   -0.04107 
AFIX  43 
H6    2    0.443318    0.111109    0.299314    11.00000   -1.20000 
AFIX   0 
C7    1    0.425684    0.169806    0.172589    11.00000    0.06829    0.14137 = 
         0.02712   -0.00825   -0.00307   -0.05915 
AFIX  43 
H7    2    0.356515    0.123380    0.148712    11.00000   -1.20000 
AFIX   0 
C8    1    0.472240    0.243290    0.117504    11.00000    0.04990    0.12445 = 
         0.02390    0.00562   -0.00568   -0.02913 
AFIX  43 
H8    2    0.436294    0.248034    0.055696    11.00000   -1.20000 
AFIX   0 
C9    1    0.570323    0.309020    0.152637    11.00000    0.07854    0.12520 = 
         0.02979    0.02503   -0.00285   -0.05294 
AFIX  43 
H9    2    0.602982    0.361364    0.115366    11.00000   -1.20000 
AFIX   0 
C10   1    0.624027    0.300759    0.243022    11.00000    0.05646    0.13421 = 
         0.02651    0.01509   -0.00763   -0.05558 
AFIX  43 
H10   2    0.693534    0.346851    0.266649    11.00000   -1.20000 
AFIX   0 
PART   1 
CL2   4    0.177874    0.000000    0.690787    10.25000    0.04126    0.11010 = 
         0.02608    0.00000   -0.00153    0.00000 
CL3   4    0.295097    0.000000    0.973117    10.25000    0.04126    0.11010 = 
         0.02608    0.00000   -0.00153    0.00000 
C11   1    0.265909    0.000000    0.800169    10.25000    0.05112    0.27367 = 
         0.06126    0.00000   -0.00390    0.00000 
AFIX   3 
H11A  2    0.318459   -0.070890    0.808269    10.50000   -1.20000 
AFIX   0 
C12   1    0.188471    0.000000    0.871229    10.25000    0.05112    0.27367 = 
         0.06126    0.00000   -0.00390    0.00000 
AFIX   3 
H12A  2    0.136741   -0.071360    0.865869    10.50000   -1.20000 
AFIX   0 
PART   2 
CL2'  4    0.180372    0.000000    0.686393    10.25000    0.04126    0.11010 = 
         0.02608    0.00000   -0.00153    0.00000 
CL3'  4    0.253336    0.000000    0.975501    10.25000    0.04126    0.11010 = 
         0.02608    0.00000   -0.00153    0.00000 
C11'  1    0.169696    0.000000    0.799202    10.25000    0.05112    0.27367 = 
         0.06126    0.00000   -0.00390    0.00000 
AFIX   3 
H11B  2    0.122596   -0.070640    0.809222    10.50000   -1.20000 
AFIX   0 
C12'  1    0.288853    0.000000    0.869032    10.25000    0.05112    0.27367 = 
         0.06126    0.00000   -0.00390    0.00000 
AFIX   3 
H12B  2    0.336883   -0.071080    0.861612    10.50000   -1.20000 
PART   0 
  
AFIX   0 
HKLF 4 
  
REM 4e in C2/m 
REM R1 =  0.0783 for    1450 Fo > 4sig(Fo)  and  0.1307 for all    2326 data 
REM    127 parameters refined using      8 restraints 
  
END 
  
WGHT      0.0715     14.2489 
  
REM Highest difference peak  1.006,  deepest hole -0.651,  1-sigma level  0.105 
Q1    1   0.6591  0.0000  0.6223  10.50000  0.05    1.01 
Q2    1   0.5345  0.0000  0.4511  10.50000  0.05    1.01 
Q3    1   0.2055 -0.0489  0.8062  11.00000  0.05    0.74 
Q4    1   0.6842 -0.0766  0.5785  11.00000  0.05    0.71 
Q5    1   0.5000  0.0847  0.5000  10.50000  0.05    0.71 
Q6    1   0.7220  0.0000  0.5332  10.50000  0.05    0.63 
Q7    1   0.7231  0.0000  0.5982  10.50000  0.05    0.48 
Q8    1   0.5781  0.0000  0.6086  10.50000  0.05    0.42 
Q9    1   0.2090  0.0000  0.6366  10.50000  0.05    0.41 
Q10   1   0.3228  0.0000  0.9309  10.50000  0.05    0.40 
Q11   1   0.5825  0.3092  0.2952  11.00000  0.05    0.38 
Q12   1   0.3550  0.0000  0.8200  10.50000  0.05    0.37 
Q13   1   0.1607  0.0000  0.7386  10.50000  0.05    0.36 
Q14   1   0.2382 -0.0670  0.9669  11.00000  0.05    0.36 
Q15   1   0.6128  0.2322  0.2631  11.00000  0.05    0.35 
Q16   1   0.5948  0.5000  0.3083  10.50000  0.05    0.35 
Q17   1   0.5858  0.2434  0.4197  11.00000  0.05    0.35 
Q18   1   0.6453  0.0000  0.5561  10.50000  0.05    0.34 
Q19   1   0.5508  0.2378  0.5027  11.00000  0.05    0.32 
Q20   1   0.5138  0.1916  0.4568  11.00000  0.05    0.32 
; 
_shelx_res_checksum   15315 
  
_shelx_hkl_file 
; 
  -2   0   0 2374.59 96.3665   2 
   2   0   0 2378.28 95.2560   1 
   4   0   0 912.087 44.1755   1 
  -4   0   0 910.608 45.8951   2 
  -6   0   0 600.619 38.3999   2 
   6   0   0 592.993 35.5488   1 
   8   0   0 236.264 24.4468   1 
  -8   0   0 214.375 27.2095   2 
  10   0   0 115.833 23.4461   1 
 -10   0   0 148.796 29.2900   2 
  12   0   0 96.9869 24.6820   1 
 -12   0   0 112.385 32.3132   2 
  14   0   0 -7.9309 19.3066   1 
 -14   0   0 19.7474 25.9468   2 
   1  -1   0 790.972 36.6639   3 
   1  -1   0 917.002 37.1845   1 
  -1  -1   0 878.989 37.5716   1 
  -1  -1   0 989.672 39.0079   2 
   1  -1   0 919.746 38.4047   2 
  -1   1   0 958.395 38.6088   2 
   1   1   0 920.925 37.7875   1 
   1   1   0 932.046 36.7289   3 
   1   1   0 960.413 38.7384   2 
  -1   1   0 755.621 36.6864   3 
  -3  -1   0 254.339 19.5590   2 
   3  -1   0 294.800 17.4465   1 
   3  -1   0 256.140 12.7809   3 
  -3   1   0 276.085 13.2663   3 
   3   1   0 237.706 11.8770   3 
  -3   1   0 273.181 19.1624   2 
   3   1   0 247.357 17.0384   1 
   5  -1   0 1000.84 50.4556   1 
  -5  -1   0 1021.03 53.5363   2 
  -5   1   0 1089.42 53.7081   2 
   5   1   0 977.284 50.5147   1 
  -5   1   0 1068.22 42.1141   3 
  -7  -1   0 65.8913 17.5266   2 
   7  -1   0 50.6044 14.5117   1 
  -7   1   0 41.0196 15.8368   2 
   7   1   0 45.9874 13.0038   1 
  -9  -1   0 305.650 32.1754   2 
   9  -1   0 340.536 31.0184   1 
   9   1   0 320.237 30.2286   1 
  -9   1   0 353.571 35.1197   2 
  11  -1   0 104.299 25.0188   1 
 -11  -1   0 109.121 29.2262   2 
 -11   1   0 92.6070 26.1115   2 
  11   1   0 99.2530 23.5609   1 
  13  -1   0 30.9193 22.4578   1 
 -13  -1   0 51.9781 25.6629   2 
 -13   1   0 29.4216 24.8694   2 
  13   1   0 43.5325 22.5133   1 
   0  -2   0 92.0172 7.60055   1 
   0  -2   0 112.784 11.8407   2 
   0   2   0 58.9014 8.40606   3 
   0   2   0 98.0173 7.51555   1 
   2  -2   0 9649.59 366.579   1 
  -2  -2   0 9953.72 370.000   2 
  -2  -2   0 9167.07 367.406   1 
  -2   2   0 9251.35 365.985   3 
  -2   2   0 9882.88 369.534   2 
   2   2   0 9232.79 367.198   3 
  -4  -2   0 1505.75 68.2033   2 
   4  -2   0 1422.03 64.1214   1 
   4   2   0 1456.93 64.9383   1 
   4   2   0 1450.52 58.3068   3 
  -4   2   0 1435.62 67.0456   2 
  -4   2   0 1420.75 59.7447   3 
   6  -2   0 1756.19 81.2214   1 
  -6  -2   0 1822.37 85.4329   2 
  -6   2   0 1788.20 72.3116   3 
   6   2   0 1823.99 82.5413   1 
  -6   2   0 1682.53 84.0390   2 
   8  -2   0 8.59966 12.0920   1 
  -8  -2   0 -7.0501 12.4850   2 
  -8   2   0 25.7742 15.1620   2 
   8   2   0 7.81987 9.95793   1 
  10  -2   0 476.527 40.8564   1 
 -10  -2   0 532.035 44.8448   2 
  10   2   0 529.854 40.8752   1 
 -10   2   0 525.536 44.9753   2 
  12  -2   0 85.9842 26.1185   1 
 -12  -2   0 193.876 36.7414   2 
  12   2   0 76.6052 23.4761   1 
 -12   2   0 70.2473 26.7104   2 
 -14  -2   0 72.5830 32.2258   2 
  14  -2   0 40.9540 26.4516   1 
 -14   2   0 19.9418 27.7161   2 
  14   2   0 49.0354 23.4683   1 
  -1  -3   0 57.1083 16.5186   2 
   1  -3   0 61.8087 15.0393   2 
   1  -3   0 55.7523 9.96303   1 
  -1  -3   0 35.7667 7.32587   1 
   1   3   0 40.3209 8.68620   3 
  -1   3   0 29.6846 8.97889   3 
  -3  -3   0 -3.7218 10.6010   2 
   3  -3   0 3.86602 6.57838   1 
  -3  -3   0 7.70859 7.32504   1 
   3   3   0 6.22683 5.06431   3 
  -3   3   0 8.84365 8.95387   2 
  -3   3   0 14.2388 6.42733   3 
  -5  -3   0 380.213 29.1663   2 
   5  -3   0 370.536 25.4515   1 
  -5   3   0 359.826 21.3913   3 
   5   3   0 363.297 25.2691   1 
   5   3   0 376.773 19.3323   3 
  -5   3   0 369.882 28.2199   2 
   7  -3   0 12.8817 11.6256   1 
  -7  -3   0 -17.029 11.9560   2 
  -7   3   0 0.28404 12.0508   2 
   7   3   0 5.72145 4.22263   3 
  -7   3   0 11.8269 7.14278   3 
   7   3   0 15.6991 10.2336   1 
   9  -3   0 137.641 25.0435   1 
  -9  -3   0 135.845 28.0008   2 
   9   3   0 183.051 27.6835   1 
  -9   3   0 139.662 27.1157   2 
 -11  -3   0 -3.3342 16.8539   2 
  11  -3   0 2.81666 18.2183   1 
  11   3   0 -0.2632 14.3030   1 
 -11   3   0 14.5507 21.0905   2 
  13  -3   0 26.2866 23.4375   1 
 -13  -3   0 -1.0920 21.0222   2 
  13   3   0 37.0937 21.8175   1 
 -13   3   0 35.3381 27.6149   2 
   0  -4   0 9181.14 348.965   1 
   0  -4   0 9032.59 355.588   2 
   0   4   0 8912.31 351.616   3 
   2  -4   0 649.373 31.8580   1 
  -2  -4   0 642.460 37.9851   2 
  -2  -4   0 618.873 31.8064   1 
  -2   4   0 648.355 33.7412   3 
   2   4   0 643.302 32.3481   3 
  -2   4   0 705.833 36.1423   2 
   4  -4   0 18.4084 10.0053   1 
  -4  -4   0 22.8472 9.50755   1 
  -4  -4   0 27.5140 14.3494   2 
  -4   4   0 28.8081 10.3174   3 
   4   4   0 25.7316 7.12192   3 
  -4   4   0 38.7138 13.5586   2 
   6  -4   0 248.567 22.6072   1 
  -6  -4   0 216.784 25.1423   2 
   6   4   0 252.703 22.5291   1 
  -6   4   0 250.226 26.4333   2 
  -6   4   0 216.538 18.7445   3 
   6   4   0 241.469 15.6383   3 
   8  -4   0 103.945 20.8112   1 
  -8  -4   0 119.374 26.0908   2 
  -8   4   0 104.384 13.9673   3 
  -8   4   0 121.136 24.6956   2 
   8   4   0 116.655 10.5154   3 
   8   4   0 109.107 21.1220   1 
  10  -4   0 143.480 27.1734   1 
 -10  -4   0 132.429 30.0973   2 
  10   4   0 142.053 26.3166   1 
 -10   4   0 136.064 29.4764   2 
  12  -4   0 60.4756 25.9244   1 
 -12  -4   0 138.847 32.9019   2 
  12   4   0 93.1511 24.7470   1 
 -12   4   0 102.560 32.2817   2 
   1  -5   0 970.781 53.0868   2 
   1  -5   0 977.347 44.1423   1 
  -1  -5   0 1001.30 53.0946   2 
  -1  -5   0 977.933 43.8693   1 
   1   5   0 1010.02 47.5065   3 
  -1   5   0 839.957 46.7586   3 
  -3  -5   0 150.512 15.1916   1 
   3  -5   0 168.757 18.6681   1 
  -3  -5   0 186.869 25.0742   2 
   3   5   0 165.844 16.0157   3 
  -3   5   0 186.009 21.0627   2 
  -3   5   0 150.264 17.4169   3 
  -5  -5   0 434.939 35.4370   2 
   5  -5   0 477.506 31.2278   1 
   5   5   0 464.812 26.7166   3 
  -5   5   0 440.557 34.7001   2 
   5   5   0 469.580 29.9806   1 
  -5   5   0 459.130 30.1791   3 
   7  -5   0 15.7160 14.9408   1 
  -7  -5   0 -2.9220 16.6002   2 
  -7   5   0 -8.8213 11.1188   3 
   7   5   0 5.82968 6.71160   3 
  -7   5   0 24.6795 17.1759   2 
   7   5   0 21.3691 11.7931   1 
  -9  -5   0 95.8682 25.3897   2 
   9  -5   0 84.4998 22.5309   1 
  -9   5   0 140.252 29.4652   2 
  -9   5   0 92.6967 14.0937   3 
   9   5   0 89.6274 22.5719   1 
 -11  -5   0 59.7155 26.6822   2 
  11  -5   0 35.0930 23.6372   1 
 -11   5   0 46.5639 27.3893   2 
  11   5   0 30.9177 19.4108   1 
 -13  -5   0 -46.513 15.8866   2 
  13  -5   0 -43.755 18.9961   1 
  13   5   0 26.4102 20.5985   1 
 -13   5   0 2.86429 28.1183   2 
   0  -6   0 2243.03 106.871   2 
   0  -6   0 2324.08 95.8273   1 
   0   6   0 2376.05 101.252   3 
   2  -6   0 64.8986 13.8595   1 
  -2  -6   0 72.1994 22.1799   2 
  -2  -6   0 87.8542 13.7468   1 
   2  -6   0 84.3462 21.7421   2 
   2   6   0 70.8529 13.5835   3 
  -2   6   0 45.6386 12.6342   3 
   4  -6   0 340.481 28.3424   1 
  -4  -6   0 357.819 25.9762   1 
  -4  -6   0 315.949 32.9085   2 
   4   6   0 311.043 23.9263   3 
  -4   6   0 364.426 27.1564   3 
  -4   6   0 418.448 32.9904   2 
   6  -6   0 593.118 40.6914   1 
  -6  -6   0 468.923 43.2240   2 
   6   6   0 594.655 33.8431   3 
   6   6   0 580.279 37.8118   1 
  -6   6   0 662.334 38.4940   3 
  -6   6   0 599.191 45.0481   2 
  -8  -6   0 -6.7743 15.7028   2 
   8  -6   0 1.00279 18.3488   1 
   8   6   0 10.2820 7.78892   3 
   8   6   0 -11.088 10.0857   1 
  -8   6   0 5.19384 18.3679   2 
  10  -6   0 190.814 33.7950   1 
 -10  -6   0 186.872 35.5693   2 
  10   6   0 281.813 33.0173   1 
 -10   6   0 191.093 37.4409   2 
 -12  -6   0 18.3263 21.4806   2 
  12  -6   0 9.53568 26.3716   1 
 -12   6   0 38.5126 29.1843   2 
  12   6   0 34.0920 20.9692   1 
  -1  -7   0 30.1532 23.4478   2 
   1  -7   0 35.1553 11.5378   1 
   1  -7   0 39.3362 22.9644   2 
  -1  -7   0 16.0788 9.31990   1 
  -1   7   0 11.8747 13.3683   3 
   1   7   0 19.3470 11.1625   3 
  -3  -7   0 11.9073 10.3329   1 
   3  -7   0 35.3680 22.0045   2 
   3  -7   0 -4.5356 14.8474   1 
  -3  -7   0 24.6520 21.9926   2 
   3   7   0 10.6007 9.91641   3 
  -3   7   0 18.8679 12.6649   3 
   5  -7   0 289.762 32.9280   1 
  -5  -7   0 273.483 34.0469   2 
  -5  -7   0 303.293 25.6718   1 
   5   7   0 275.341 24.5976   3 
  -5   7   0 300.865 34.2741   2 
  -5   7   0 269.134 27.8294   3 
   7  -7   0 11.7167 21.4689   1 
  -7  -7   0 19.9550 21.5269   2 
   7   7   0 22.0664 14.4261   1 
  -7   7   0 21.3081 22.2975   2 
  -7   7   0 -16.990 14.8152   3 
   7   7   0 -0.1362 9.41584   3 
  -9  -7   0 79.3646 27.5957   2 
   9  -7   0 87.1140 27.8489   1 
  -9   7   0 89.8480 30.7324   2 
  -9   7   0 82.4224 18.0160   3 
   9   7   0 90.7740 23.3121   1 
 -11  -7   0 64.2803 26.1330   2 
  11  -7   0 1.14580 26.8580   1 
  11   7   0 68.1217 23.2428   1 
 -11   7   0 70.9231 30.7658   2 
   0  -8   0 1142.49 54.1726   1 
   0  -8   0 1009.58 69.4698   2 
   0   8   0 1263.84 62.2500   3 
  -2  -8   0 -27.012 26.2272   2 
  -2  -8   0 12.9714 10.9432   1 
   2  -8   0 -32.218 23.3633   2 
   2  -8   0 24.2769 13.8431   1 
   2   8   0 -4.9605 11.4820   3 
  -2   8   0 -17.306 14.4935   3 
  -4  -8   0 121.141 20.1376   1 
  -4  -8   0 121.226 30.8921   2 
   4  -8   0 127.587 26.4991   1 
   4  -8   0 135.798 34.2454   2 
   4   8   0 122.043 21.2923   3 
  -4   8   0 151.394 26.1655   3 
  -6  -8   0 177.500 34.1111   2 
   6  -8   0 169.328 32.0778   1 
   6   8   0 199.803 26.9912   1 
   6   8   0 183.823 23.7421   3 
  -6   8   0 173.789 28.7592   3 
  -6   8   0 163.763 32.1459   2 
   8  -8   0 47.9543 28.1419   1 
  -8  -8   0 73.5226 27.3058   2 
   8   8   0 41.8933 13.9961   3 
  -8   8   0 68.9043 20.7538   3 
  -8   8   0 72.3322 29.2980   2 
   8   8   0 99.6924 23.5515   1 
  10  -8   0 -24.815 26.8052   1 
 -10  -8   0 25.0032 24.6210   2 
  10   8   0 23.0939 18.1309   1 
 -10   8   0 -53.687 24.2539   2 
 -12  -8   0 66.7616 29.4650   2 
 -12   8   0 -4.2851 31.4554   2 
  -1  -9   0 152.012 39.1716   2 
  -1  -9   0 195.101 21.5153   1 
   1  -9   0 235.055 23.0989   1 
   1  -9   0 199.467 41.3273   2 
   1   9   0 165.817 24.4929   3 
  -1   9   0 175.468 25.9045   3 
   3  -9   0 7.09089 16.1201   1 
  -3  -9   0 -8.5568 12.1059   1 
  -3  -9   0 -2.0129 27.2458   2 
   3  -9   0 -29.217 26.7742   2 
   3   9   0 -15.459 11.0365   3 
  -3   9   0 -12.713 13.4637   3 
   5  -9   0 38.0624 30.6489   2 
   5  -9   0 67.6503 25.2510   1 
  -5  -9   0 69.6893 29.2657   2 
  -5   9   0 13.6939 20.3900   3 
   5   9   0 6.28755 15.0464   3 
   7  -9   0 -24.520 26.7366   1 
  -7  -9   0 -0.6209 21.2622   2 
   7   9   0 -4.2654 11.0379   3 
   7   9   0 -13.178 13.1682   1 
  -7   9   0 22.1252 19.6443   3 
   9  -9   0 -45.007 29.5915   1 
  -9  -9   0 -9.3238 21.4865   2 
  -9   9   0 7.20457 29.5925   2 
  -9   9   0 7.19354 17.6722   3 
   9   9   0 -7.1124 13.7362   1 
 -11  -9   0 42.4828 26.3724   2 
 -11   9   0 22.2195 33.3325   2 
  11   9   0 29.1422 20.7481   1 
   0 -10   0 158.650 41.3200   2 
   0 -10   0 126.401 18.7168   1 
   0  10   0 128.467 24.8348   3 
  -2 -10   0 60.8166 15.8686   1 
  -2 -10   0 16.1038 30.0777   2 
   2 -10   0 44.5563 36.0457   2 
   2 -10   0 77.4156 17.2714   1 
   2  10   0 51.5523 19.6682   3 
  -2  10   0 64.5512 21.9190   3 
  -4 -10   0 4.17662 14.0241   1 
  -4 -10   0 22.6522 25.6294   2 
   4 -10   0 11.5294 30.1484   2 
  -4  10   0 -7.3310 17.1889   3 
   4  10   0 5.29095 15.5721   3 
   6 -10   0 89.1027 37.9372   2 
  -6 -10   0 82.4471 28.0364   2 
   6  10   0 84.3655 20.0885   1 
  -6  10   0 103.747 28.5898   3 
   6  10   0 54.4085 19.3829   3 
   8 -10   0 139.102 41.1882   2 
  -8 -10   0 72.3204 30.7776   2 
   8  10   0 7.72411 15.6260   1 
 -10 -10   0 47.3857 26.0356   2 
  10  10   0 37.5258 23.6526   1 
 -10  10   0 16.6949 34.4819   2 
   1 -11   0 59.1069 36.5503   2 
  -1 -11   0 59.0779 36.4312   2 
   1  11   0 41.7861 22.2654   3 
  -1  11   0 4.34974 19.7370   3 
   3 -11   0 -34.700 33.0151   2 
  -3 -11   0 13.4474 14.1514   1 
  -3 -11   0 -1.9448 26.9119   2 
  -3  11   0 0.05144 22.3277   3 
   3  11   0 9.09673 18.0268   3 
   5 -11   0 70.3831 40.7981   2 
  -5 -11   0 127.516 33.7848   2 
  -5  11   0 113.337 29.0009   3 
   5  11   0 60.2943 17.9604   1 
   5  11   0 85.0017 23.5900   3 
  -7 -11   0 42.6739 24.4773   2 
   7 -11   0 13.8078 34.3082   2 
   7  11   0 -8.1436 16.9609   1 
  -7  11   0 -8.8583 22.9882   3 
   7  11   0 -6.9847 13.6978   3 
   9 -11   0 93.9612 39.4712   2 
  -9 -11   0 13.8253 24.9237   2 
   9  11   0 -11.154 17.8479   1 
  -9  11   0 26.7401 23.7847   3 
   0 -12   0 67.2390 39.7308   2 
   0  12   0 81.1225 27.6229   3 
   2 -12   0 7.62842 38.3988   2 
  -2 -12   0 -7.3603 30.8353   2 
   2  12   0 0.70590 19.5814   3 
  -2  12   0 6.96032 21.8267   3 
   4 -12   0 -29.708 36.6386   2 
  -4 -12   0 69.2467 31.1476   2 
   4  12   0 -7.0858 20.2782   3 
  -4  12   0 116.300 28.1059   3 
   6 -12   0 14.0873 38.7528   2 
  -6 -12   0 84.1942 31.1795   2 
  -6  12   0 72.7975 27.6385   3 
   6  12   0 -5.9573 19.4077   3 
   8 -12   0 -4.5356 42.5906   2 
  -8 -12   0 39.0119 31.1161   2 
  -8  12   0 -28.267 20.7439   3 
   8  12   0 -23.820 23.0021   3 
   1 -13   0 110.230 45.1554   2 
  -1 -13   0 28.7706 39.5129   2 
   1  13   0 101.010 27.7142   3 
  -1  13   0 46.3704 28.7276   3 
   3 -13   0 24.0333 44.3014   2 
  -3 -13   0 7.57208 28.1905   2 
   3  13   0 22.2663 21.2210   3 
  -3  13   0 -45.906 20.7218   3 
   5 -13   0 48.2495 48.5427   2 
  -5 -13   0 70.5890 29.0877   2 
   5  13   0 15.5506 21.5073   3 
  -5  13   0 13.1926 28.9759   3 
   0 -14   0 89.4029 48.4884   2 
   0  14   0 127.506 32.5247   3 
  -2 -14   0 23.6594 35.6023   2 
   2 -14   0 19.4092 46.2115   2 
   2  14   0 26.6824 22.9583   3 
  -2  14   0 25.4694 24.8759   3 
  -4 -14   0 16.7028 27.7342   2 
   4 -14   0 -54.525 45.0311   2 
  -4  14   0 -0.6926 23.6829   3 
   4  14   0 -49.919 19.6307   3 
  14   0  -1 26.8048 22.9674   1 
 -14   0   1 -16.134 21.2656   2 
  12   0  -1 461.927 42.3026   1 
 -12   0   1 491.559 46.5817   2 
 -10   0   1 -20.699 14.1497   2 
  10   0  -1 -24.610 10.8975   1 
  -8   0   1 50.7654 17.9267   2 
   8   0  -1 59.3047 15.5709   1 
   6   0  -1 4613.90 186.820   1 
  -6   0   1 4462.24 189.097   2 
  -4   0   1 545.230 31.6033   2 
   4   0  -1 527.126 28.8868   1 
  -2   0   1 1450.38 56.8386   3 
  -2   0   1 1446.00 56.9106   3 
  -2   0   1 1496.90 61.9428   2 
   2   0  -1 1481.06 60.3940   1 
   0   0  -1 3555.29 146.121   2 
   0   0  -1 3872.29 145.730   1 
   0   0  -1 3887.06 144.963   3 
   2   0   1 2994.80 118.868   3 
  -2   0  -1 3147.70 122.227   1 
  -2   0  -1 3078.30 123.192   2 
  -2   0  -1 3034.17 119.071   3 
   4   0   1 1123.48 44.5027   3 
   4   0   1 1107.99 52.1162   1 
  -4   0  -1 1086.62 53.4029   2 
  -6   0  -1 274.857 25.5849   2 
   6   0   1 277.850 23.3434   1 
   8   0   1 319.775 28.6937   1 
  -8   0  -1 323.285 31.4483   2 
  10   0   1 405.356 35.2726   1 
 -10   0  -1 307.155 35.6088   2 
  12   0   1 57.6488 21.0367   1 
 -12   0  -1 57.6188 26.3342   2 
 -14   0  -1 -25.339 21.3109   2 
  14   0   1 -19.959 18.5536   1 
 -13  -1   1 11.7023 23.0164   2 
  13  -1  -1 -31.631 17.9955   1 
 -13   1   1 10.0187 21.1195   2 
  13   1  -1 4.25396 18.4368   1 
 -11  -1   1 427.015 40.8229   2 
  11  -1  -1 400.272 39.0968   1 
 -11   1   1 401.132 41.3970   2 
  11   1  -1 410.502 37.4059   1 
   9  -1  -1 55.5813 17.3404   1 
  -9  -1   1 85.0188 23.3610   2 
   9   1  -1 52.8344 17.1718   1 
  -9   1   1 64.6779 19.8446   2 
   7  -1  -1 278.031 24.6096   1 
  -7  -1   1 265.757 27.1663   2 
  -7   1   1 310.318 27.9651   2 
   7   1  -1 213.784 22.3364   1 
  -5  -1   1 829.121 47.1073   2 
   5  -1  -1 910.148 45.2010   1 
  -5   1   1 912.626 47.6959   2 
   5   1  -1 892.756 45.1576   1 
   3  -1  -1 1378.53 57.1024   1 
   3  -1  -1 1323.27 52.4173   3 
  -3  -1   1 1249.47 59.0778   2 
  -3  -1   1 1289.77 51.3680   3 
  -3   1   1 1208.53 58.0881   2 
   3   1  -1 1316.86 51.3621   3 
  -3   1   1 1365.66 52.4063   3 
   3   1  -1 1305.31 57.0472   1 
  -1  -1   1 -5.0714 0.87680   3 
   1  -1   1 1709.71 70.5790   1 
  -1  -1  -1 1874.44 72.0761   2 
  -1  -1  -1 1794.42 72.1661   1 
   1  -1   1 1662.09 70.7444   1 
   1  -1   1 1772.39 71.0940   3 
   1   1   1 1954.52 72.2393   2 
   1   1   1 1846.55 71.1098   3 
  -1   1  -1 1760.69 71.0750   3 
  -1   1  -1 1786.67 72.7018   2 
  -3  -1  -1 355.923 21.5738   1 
  -3  -1  -1 338.996 22.5720   2 
   3  -1   1 364.669 20.8069   1 
   3   1   1 325.725 16.7564   3 
  -3   1  -1 372.500 17.2632   3 
  -3   1  -1 393.695 23.4445   2 
  -5  -1  -1 64.2937 14.3475   2 
   5  -1   1 49.2262 11.9656   1 
   5   1   1 58.3508 11.9690   1 
  -5   1  -1 44.7906 13.0654   2 
  -5   1  -1 51.6439 6.82234   3 
   7  -1   1 398.437 29.8138   1 
  -7  -1  -1 398.576 32.3177   2 
  -7   1  -1 375.741 32.3039   2 
   7   1   1 410.523 30.2565   1 
   9  -1   1 33.9359 15.3833   1 
  -9  -1  -1 26.2581 18.8264   2 
   9   1   1 30.1540 13.9709   1 
  -9   1  -1 19.4086 16.4360   2 
  11  -1   1 222.914 33.1183   1 
 -11  -1  -1 245.718 37.6379   2 
  11   1   1 226.850 32.8143   1 
 -11   1  -1 204.229 35.6870   2 
 -13  -1  -1 10.2749 24.5011   2 
  13  -1   1 37.5665 22.1368   1 
  13   1   1 -0.7181 18.2253   1 
 -13   1  -1 12.8950 23.9399   2 
 -14  -2   1 73.3446 30.5358   2 
  14  -2  -1 66.7421 27.4852   1 
 -14   2   1 74.1399 29.8822   2 
  14   2  -1 22.8793 20.3183   1 
 -12  -2   1 130.121 31.0843   2 
  12  -2  -1 144.349 30.1697   1 
 -12   2   1 169.277 34.1769   2 
  12   2  -1 149.384 29.1577   1 
 -10  -2   1 33.8890 16.9648   2 
  10  -2  -1 9.99659 15.9468   1 
  10   2  -1 32.5293 15.5835   1 
 -10   2   1 21.1815 18.4913   2 
  -8  -2   1 8.23677 15.4300   2 
   8  -2  -1 16.4745 13.1335   1 
   8   2  -1 16.7204 11.4190   1 
  -8   2   1 -0.5276 13.4944   2 
   6  -2  -1 1217.39 58.9733   1 
  -6  -2   1 1134.87 62.1071   2 
  -6   2   1 1211.36 49.5584   3 
   6   2  -1 1139.34 58.5917   1 
  -6   2   1 1171.50 61.6011   2 
   4  -2  -1 230.920 18.1988   1 
  -4  -2   1 305.889 22.6666   2 
  -4   2   1 224.825 19.7199   2 
  -4   2   1 215.169 14.2166   3 
   4   2  -1 261.462 18.5783   1 
   4   2  -1 271.511 13.3591   3 
   2  -2  -1 6190.54 245.412   1 
  -2  -2   1 6724.04 249.170   2 
  -2   2   1 5649.69 244.496   3 
  -2   2   1 6380.30 246.964   2 
   2   2  -1 6611.04 244.294   3 
   2   2  -1 6404.57 245.545   1 
   0  -2   1 20.8162 9.00256   2 
   0  -2  -1 16.9599 7.58505   2 
   0  -2  -1 3.80433 5.04045   1 
   0   2   1 6.82207 4.87897   3 
   0   2   1 3.12535 6.04555   2 
   0   2  -1 -6.0050 4.28525   3 
  -2  -2  -1 1059.20 48.7209   2 
   2  -2   1 1069.02 45.6346   1 
  -2  -2  -1 1045.98 47.6797   1 
  -2   2  -1 1095.88 49.2701   2 
  -2   2  -1 1069.63 45.9720   3 
   2   2   1 1078.53 45.5459   3 
  -4  -2  -1 854.449 44.4800   2 
  -4  -2  -1 850.775 42.0447   1 
   4  -2   1 820.296 40.9485   1 
  -4   2  -1 803.867 43.9101   2 
   4   2   1 851.613 36.3916   3 
  -4   2  -1 848.726 37.1854   3 
  -6  -2  -1 1248.62 65.2674   2 
   6  -2   1 1209.63 61.1781   1 
  -6   2  -1 1270.92 53.2191   3 
   6   2   1 1267.11 51.3884   3 
  -6   2  -1 1228.12 65.2337   2 
   6   2   1 1315.53 63.4052   1 
   8  -2   1 1.35439 11.3272   1 
  -8  -2  -1 5.34772 15.3593   2 
   8   2   1 -0.5691 8.79838   1 
  -8   2  -1 1.86739 12.8870   2 
  -8   2  -1 12.9888 5.94451   3 
 -10  -2  -1 1222.07 70.9666   2 
  10  -2   1 1073.03 65.5728   1 
 -10   2  -1 1054.60 69.6551   2 
  10   2   1 1197.69 67.7956   1 
  12  -2   1 33.5096 19.9001   1 
 -12  -2  -1 4.61837 22.5714   2 
  12   2   1 22.7302 17.2062   1 
 -12   2  -1 33.6902 25.1750   2 
 -14  -2  -1 -37.819 18.4276   2 
 -14   2  -1 -23.782 18.0931   2 
 -13  -3   1 45.9888 25.5186   2 
  13  -3  -1 -9.4618 20.8222   1 
 -13   3   1 48.4017 26.6181   2 
  13   3  -1 -8.1573 18.8479   1 
 -11  -3   1 118.096 30.0021   2 
  11  -3  -1 128.687 27.6370   1 
  11   3  -1 178.660 29.8605   1 
 -11   3   1 108.858 29.4612   2 
   9  -3  -1 6.83820 14.2100   1 
  -9  -3   1 -30.262 11.6818   2 
  -9   3   1 19.4086 15.8991   2 
   9   3  -1 -4.1106 10.6249   1 
  -7  -3   1 -6.5855 14.0347   2 
   7  -3  -1 14.6820 12.3470   1 
  -7   3   1 9.26401 6.63994   3 
   7   3  -1 8.89590 8.78598   1 
  -7   3   1 13.4567 12.9441   2 
  -5  -3   1 90.3716 19.9587   2 
   5  -3  -1 104.097 16.0765   1 
  -5   3   1 99.4242 16.8150   2 
   5   3  -1 115.436 16.3161   1 
  -5   3   1 99.7625 12.2347   3 
   5   3  -1 74.8448 8.88591   3 
  -3  -3   1 32.7779 13.4566   2 
   3  -3  -1 44.0418 10.2800   1 
   3   3  -1 29.7961 7.93768   1 
   3   3  -1 42.7788 7.19604   3 
  -3   3   1 40.3375 8.29581   3 
  -3   3   1 45.6108 11.3397   2 
  -1  -3   1 337.524 27.4300   2 
   1  -3  -1 295.229 19.8544   1 
  -1  -3   1 311.112 15.6211   1 
   1  -3  -1 294.065 22.7193   2 
  -1   3   1 249.427 18.4784   3 
   1   3  -1 276.170 18.3103   3 
   1   3  -1 305.411 15.8753   1 
   1  -3   1 2348.35 96.6453   1 
   1  -3   1 2480.75 105.306   2 
  -1  -3  -1 2745.54 102.514   2 
  -1  -3  -1 2491.89 100.172   1 
  -1   3  -1 2315.78 100.353   3 
   1   3   1 2514.06 100.547   3 
  -1   3  -1 2418.56 96.4668   1 
   3  -3   1 1229.96 54.0549   1 
  -3  -3  -1 1244.07 56.2496   1 
  -3  -3  -1 1265.39 58.5702   2 
   3   3   1 1233.56 53.2208   3 
  -3   3  -1 1278.41 58.8864   2 
  -3   3  -1 1185.13 53.8682   3 
  -5  -3  -1 810.557 45.8169   2 
   5  -3   1 777.113 41.4143   1 
  -5   3  -1 818.927 37.8884   3 
   5   3   1 798.367 36.1534   3 
  -5   3  -1 773.190 45.9253   2 
  -7  -3  -1 209.004 29.2003   2 
   7  -3   1 211.209 22.0718   1 
  -7   3  -1 186.354 15.2817   3 
   7   3   1 220.287 22.7593   1 
  -7   3  -1 175.306 25.7309   2 
   7   3   1 200.323 12.6061   3 
   9  -3   1 8.27331 13.9185   1 
  -9  -3  -1 10.3400 14.9382   2 
  -9   3  -1 -16.913 12.6393   2 
   9   3   1 -5.4729 12.4126   1 
 -11  -3  -1 184.931 35.7039   2 
  11  -3   1 188.136 31.5141   1 
  11   3   1 181.475 30.2639   1 
 -11   3  -1 136.660 31.4945   2 
 -13  -3  -1 14.5305 21.7114   2 
  13  -3   1 -25.142 17.2901   1 
  13   3   1 -4.9366 18.9656   1 
 -13   3  -1 16.0725 25.1135   2 
  12  -4  -1 339.478 40.4044   1 
 -12  -4   1 419.812 43.6791   2 
 -12   4   1 390.550 45.3957   2 
  12   4  -1 315.661 37.9268   1 
  10  -4  -1 36.6323 20.2313   1 
 -10  -4   1 28.6559 20.7076   2 
 -10   4   1 35.3048 21.1422   2 
  10   4  -1 19.3501 14.6692   1 
  -8  -4   1 -6.7622 16.2536   2 
   8  -4  -1 -1.7749 13.7773   1 
  -8   4   1 -17.494 6.88595   3 
   8   4  -1 -0.9720 4.77265   3 
  -8   4   1 -2.1432 14.4052   2 
   8   4  -1 7.74207 11.3604   1 
  -6  -4   1 648.548 44.8668   2 
   6  -4  -1 671.666 40.8310   1 
   6   4  -1 745.352 33.1017   3 
  -6   4   1 636.092 43.2419   2 
  -6   4   1 658.338 35.9487   3 
   6   4  -1 743.444 41.0495   1 
   4  -4  -1 1169.47 54.7539   1 
  -4  -4   1 1191.45 61.1958   2 
  -4   4   1 1086.01 52.9651   3 
   4   4  -1 1201.51 51.6609   3 
  -4   4   1 1186.32 58.2631   2 
   4   4  -1 1166.98 54.5082   1 
  -2  -4   1 63.4570 18.1176   2 
  -2  -4   1 63.8011 9.79107   1 
   2  -4  -1 92.7816 13.6348   1 
  -2   4   1 93.8890 12.4774   3 
   2   4  -1 70.0831 10.5884   3 
  -2   4   1 96.0944 13.8663   2 
   0  -4  -1 667.788 31.8232   1 
   0  -4  -1 679.264 37.1266   2 
   0  -4   1 633.952 27.8138   1 
   0  -4   1 645.114 38.4921   2 
   0   4  -1 572.329 32.7840   3 
   0   4  -1 516.040 27.5204   1 
   0   4   1 692.110 33.2355   3 
   2  -4   1 55.7623 9.30899   1 
  -2  -4  -1 63.1925 10.9355   1 
  -2  -4  -1 36.8298 14.2079   2 
  -2   4  -1 48.6491 10.9238   3 
   2   4   1 68.0822 10.6985   3 
  -2   4  -1 51.5569 13.2588   2 
   4  -4   1 222.827 18.0166   1 
  -4  -4  -1 243.762 24.2385   2 
  -4  -4  -1 204.399 19.3106   1 
  -4   4  -1 245.374 18.8462   3 
  -4   4  -1 222.877 22.8552   2 
   4   4   1 223.312 16.6394   3 
  -6  -4  -1 91.1306 21.0442   2 
   6  -4   1 113.091 18.1534   1 
  -6   4  -1 76.7144 19.5827   2 
   6   4   1 88.2536 16.5559   1 
  -6   4  -1 90.3171 12.8574   3 
   6   4   1 95.2273 11.3689   3 
   8  -4   1 241.740 26.7170   1 
  -8  -4  -1 234.478 32.3437   2 
   8   4   1 226.835 25.3292   1 
  -8   4  -1 216.588 17.8126   3 
   8   4   1 212.678 14.6393   3 
  -8   4  -1 242.698 31.2625   2 
  10  -4   1 241.405 33.3772   1 
 -10  -4  -1 219.318 36.1770   2 
  10   4   1 266.332 31.6136   1 
 -10   4  -1 251.955 38.0695   2 
  12  -4   1 10.4567 21.6276   1 
 -12  -4  -1 -28.629 14.8000   2 
  12   4   1 31.3871 18.0418   1 
 -12   4  -1 -2.7352 23.1962   2 
  13  -5  -1 -36.062 21.4020   1 
 -13  -5   1 -11.305 23.7922   2 
  13   5  -1 3.14680 19.5338   1 
 -13   5   1 -35.067 23.3706   2 
 -11  -5   1 175.429 35.2172   2 
  11  -5  -1 140.230 30.8463   1 
 -11   5   1 178.667 35.7768   2 
  11   5  -1 168.805 29.8664   1 
  -9  -5   1 0.91459 17.3548   2 
   9  -5  -1 1.43035 17.4216   1 
  -9   5   1 14.2348 18.6346   2 
  -9   5   1 18.6226 9.36189   3 
   9   5  -1 -0.1161 13.4417   1 
   7  -5  -1 84.6367 21.1667   1 
  -7  -5   1 98.1595 25.6090   2 
   7   5  -1 93.1767 18.3138   1 
  -7   5   1 67.6704 15.0412   3 
   7   5  -1 79.0150 11.6197   3 
  -7   5   1 62.5633 21.7540   2 
   5  -5  -1 248.803 24.4850   1 
  -5  -5   1 232.539 27.7915   2 
   5   5  -1 220.401 18.1194   3 
  -5   5   1 240.731 25.3641   2 
   5   5  -1 259.114 20.9422   1 
  -5   5   1 182.782 20.8813   3 
  -3  -5   1 270.239 19.3030   1 
   3  -5  -1 279.225 23.3532   1 
  -3  -5   1 275.232 29.5116   2 
   3   5  -1 306.541 20.9303   3 
  -3   5   1 288.337 22.5765   3 
  -3   5   1 297.653 25.4404   2 
  -1  -5   1 987.194 42.5377   1 
   1  -5  -1 946.109 45.8094   1 
  -1  -5   1 910.765 54.4275   2 
   1  -5  -1 965.063 51.6138   2 
   1   5  -1 1011.66 47.9699   3 
   1  -5   1 1101.62 49.7694   1 
  -1  -5  -1 1148.25 59.5515   2 
  -1  -5  -1 1289.86 54.2578   1 
   1  -5   1 1087.09 60.4651   2 
  -1   5  -1 1164.56 56.0852   3 
   1   5   1 1213.17 55.3308   3 
  -3  -5  -1 13.6331 14.8111   2 
   3  -5   1 23.1662 10.3522   1 
  -3  -5  -1 16.8608 9.46193   1 
   3   5   1 11.4680 8.54067   3 
  -3   5  -1 43.1532 14.4876   2 
  -3   5  -1 20.9081 10.2288   3 
   5  -5   1 67.1480 15.2793   1 
  -5  -5  -1 41.6058 17.4644   2 
  -5  -5  -1 41.7577 13.1134   1 
  -5   5  -1 28.6029 12.7596   3 
  -5   5  -1 63.7849 18.9205   2 
   5   5   1 43.2384 10.9408   3 
  -7  -5  -1 224.125 32.4970   2 
   7  -5   1 207.490 24.9913   1 
   7   5   1 241.569 18.1349   3 
  -7   5  -1 219.925 32.2650   2 
   7   5   1 236.086 24.3080   1 
  -7   5  -1 194.971 19.9689   3 
  -9  -5  -1 -4.2893 16.6804   2 
   9  -5   1 16.2221 18.1427   1 
  -9   5  -1 5.48894 11.0533   3 
   9   5   1 4.78529 13.4029   1 
  -9   5  -1 9.53128 18.8705   2 
 -11  -5  -1 -3.4894 16.8776   2 
  11  -5   1 23.9474 21.3734   1 
 -11   5  -1 5.66703 21.7323   2 
  11   5   1 26.4851 18.2779   1 
 -13  -5  -1 9.91259 25.4723   2 
  13  -5   1 -3.1427 23.4159   1 
 -13   5  -1 -13.712 27.1489   2 
  13   5   1 12.0161 20.5677   1 
 -12  -6   1 63.4096 30.0388   2 
  12  -6  -1 -7.8419 26.0830   1 
 -12   6   1 77.4188 32.9408   2 
  12   6  -1 61.0092 22.9301   1 
 -10  -6   1 11.5796 18.1194   2 
  10  -6  -1 18.0133 22.3975   1 
  10   6  -1 20.7140 18.1297   1 
 -10   6   1 26.6832 24.6310   2 
  -8  -6   1 52.5237 24.4239   2 
   8  -6  -1 62.0762 22.2570   1 
  -8   6   1 84.3966 16.2906   3 
   8   6  -1 56.6295 11.3055   3 
  -8   6   1 59.7807 23.6904   2 
   8   6  -1 60.2052 17.7636   1 
   6  -6  -1 1180.13 64.0869   1 
  -6  -6   1 1089.77 68.7270   2 
   6   6  -1 1191.73 57.8845   3 
  -6   6   1 1288.30 69.3114   2 
  -6   6   1 1349.20 62.2785   3 
   6   6  -1 1250.33 62.9304   1 
  -4  -6   1 -8.8396 18.1244   2 
   4  -6  -1 22.3956 16.5326   1 
  -4   6   1 24.5886 16.9216   2 
  -4   6   1 21.0521 12.7079   3 
   4   6  -1 3.86708 9.46964   3 
  -2  -6   1 759.530 36.5067   1 
  -2  -6   1 701.696 48.8694   2 
   2  -6  -1 713.822 39.2208   1 
   2  -6  -1 698.703 45.9152   2 
   2   6  -1 799.359 40.9792   3 
  -2   6   1 791.748 42.0857   3 
   0  -6   1 269.837 32.6736   2 
   0  -6   1 192.867 14.6075   1 
   0  -6  -1 185.468 27.8973   2 
   0  -6  -1 214.706 18.9246   1 
   0   6  -1 127.347 20.4867   3 
   0   6   1 161.449 21.3293   3 
   2  -6   1 10.6183 18.8461   2 
  -2  -6  -1 28.8027 19.3158   2 
   2  -6   1 22.1973 10.4959   1 
  -2  -6  -1 25.0292 10.2453   1 
  -2   6  -1 11.1822 11.2464   3 
   2   6   1 15.1247 9.92419   3 
   4  -6   1 288.511 25.3824   1 
  -4  -6  -1 284.069 23.7758   1 
  -4  -6  -1 278.746 30.0784   2 
  -4   6  -1 357.378 31.1615   2 
   4   6   1 238.750 22.1713   3 
  -4   6  -1 350.444 26.9549   3 
   6  -6   1 479.359 35.0822   1 
  -6  -6  -1 406.577 38.1427   2 
  -6   6  -1 471.210 40.8691   2 
   6   6   1 482.610 29.5832   3 
  -6   6  -1 441.602 32.5704   3 
   8  -6   1 2.05600 17.0953   1 
  -8  -6  -1 21.9574 20.2707   2 
   8   6   1 1.01277 10.9617   1 
   8   6   1 4.63242 7.80693   3 
  -8   6  -1 8.85986 19.3848   2 
  -8   6  -1 2.22984 11.6352   3 
 -10  -6  -1 468.936 45.7967   2 
  10  -6   1 403.381 42.6761   1 
  10   6   1 593.216 46.3054   1 
 -10   6  -1 525.131 49.9655   2 
  12  -6   1 -21.650 20.8094   1 
 -12  -6  -1 50.9172 25.2247   2 
 -12   6  -1 19.9493 27.0167   2 
  12   6   1 16.1827 18.3129   1 
  11  -7  -1 102.557 32.8886   1 
 -11  -7   1 143.641 34.3640   2 
  11   7  -1 184.182 32.6592   1 
 -11   7   1 189.785 42.0692   2 
   9  -7  -1 -22.460 22.8425   1 
  -9  -7   1 45.1665 22.0396   2 
  -9   7   1 24.6514 24.0634   2 
  -9   7   1 24.3694 13.7203   3 
   9   7  -1 56.0582 18.3616   1 
   7  -7  -1 104.262 27.3748   1 
  -7  -7   1 83.3718 27.5226   2 
  -7   7   1 109.998 28.0507   2 
   7   7  -1 98.6924 16.5765   3 
   7   7  -1 109.108 21.2535   1 
  -7   7   1 57.5828 19.6461   3 
   5  -7  -1 296.899 35.1843   1 
  -5  -7   1 271.716 35.8048   2 
   5   7  -1 363.990 26.1503   1 
  -5   7   1 317.779 33.8207   2 
   5   7  -1 297.591 25.9656   3 
  -5   7   1 273.495 27.4433   3 
  -3  -7   1 135.686 16.6389   1 
  -3  -7   1 127.552 30.3119   2 
   3  -7  -1 146.599 29.6576   2 
   3  -7  -1 190.809 24.7716   1 
  -3   7   1 159.316 20.7145   3 
   3   7  -1 180.525 21.3726   3 
  -1  -7   1 14.7079 8.38218   1 
   1  -7  -1 24.5875 21.1682   2 
   1  -7  -1 20.1566 12.2522   1 
  -1  -7   1 10.4015 23.5541   2 
  -1   7   1 16.8836 13.3261   3 
   1   7  -1 -15.715 10.2131   3 
  -1  -7  -1 -4.4571 9.58005   1 
   1  -7   1 17.1901 9.11423   1 
   1  -7   1 31.6656 23.7417   2 
  -1  -7  -1 31.3515 23.5823   2 
   1   7   1 8.40168 11.1140   3 
  -1   7  -1 -18.486 10.5220   3 
   3  -7   1 -16.675 20.8529   2 
   3  -7   1 -4.6891 14.3118   1 
  -3  -7  -1 3.59264 10.2276   1 
  -3  -7  -1 3.92068 17.7374   2 
   3   7   1 -5.6409 9.11829   3 
  -3   7  -1 -8.9122 10.5946   3 
  -5  -7  -1 45.7404 14.9633   1 
  -5  -7  -1 14.7348 21.3943   2 
   5  -7   1 53.3869 21.1507   1 
  -5   7  -1 22.4445 16.5044   3 
   5   7   1 55.8532 13.9761   3 
  -5   7  -1 45.2412 22.0754   2 
  -7  -7  -1 62.9500 25.7538   2 
   7  -7   1 24.7354 20.7466   1 
   7   7   1 58.6322 14.0642   3 
  -7   7  -1 52.8413 23.9757   2 
   7   7   1 55.3193 17.9458   1 
  -7   7  -1 34.3805 15.8844   3 
   9  -7   1 -11.652 20.7168   1 
  -9  -7  -1 36.7476 22.1839   2 
   9   7   1 44.2180 17.5649   1 
  -9   7  -1 58.1687 29.0400   2 
  -9   7  -1 43.2706 16.1845   3 
  11  -7   1 107.412 30.8715   1 
 -11  -7  -1 179.588 39.0301   2 
 -11   7  -1 145.093 39.3005   2 
  11   7   1 175.074 34.4588   1 
 -12  -8   1 75.8632 31.3870   2 
  12  -8  -1 17.8799 34.7945   1 
 -12   8   1 35.9466 33.2844   2 
  12   8  -1 67.6628 25.5401   1 
 -10  -8   1 61.0584 27.0468   2 
  10  -8  -1 -26.802 27.6517   1 
 -10   8   1 1.75081 28.2652   2 
  10   8  -1 11.2204 17.7277   1 
   8  -8  -1 -27.995 25.9192   1 
  -8  -8   1 16.8270 22.3295   2 
  -8   8   1 10.9076 17.1252   3 
   8   8  -1 15.4645 11.5603   3 
  -8   8   1 4.53569 24.3436   2 
   8   8  -1 14.4097 15.4821   1 
   6  -8  -1 86.8528 28.6844   1 
  -6  -8   1 77.8088 29.4340   2 
  -6   8   1 51.9775 22.2705   3 
  -6   8   1 67.3697 26.9067   2 
   6   8  -1 68.0235 17.6574   3 
   6   8  -1 103.577 20.6379   1 
   4  -8  -1 4.45430 24.9481   2 
   4  -8  -1 18.6024 21.2586   1 
  -4  -8   1 3.74014 27.0341   2 
   4   8  -1 3.12095 13.1937   3 
  -4   8   1 5.39754 16.1464   3 
  -2  -8   1 242.823 20.3020   1 
   2  -8  -1 236.640 24.4223   1 
  -2  -8   1 225.298 39.9518   2 
   2  -8  -1 259.153 38.8379   2 
  -2   8   1 256.955 28.4903   3 
   2   8  -1 213.972 25.0097   3 
   0  -8  -1 566.643 34.6809   1 
   0  -8  -1 442.506 46.8117   2 
   0  -8   1 581.800 53.8220   2 
   0  -8   1 522.146 29.5417   1 
   0   8   1 544.235 37.8113   3 
   0   8  -1 578.820 40.3785   3 
  -2  -8  -1 24.4317 13.9962   1 
   2  -8   1 33.7318 28.1819   2 
  -2  -8  -1 -10.430 24.0653   2 
   2  -8   1 40.9623 13.1502   1 
   2   8   1 37.1324 14.7735   3 
  -2   8  -1 33.2032 17.6296   3 
   4  -8   1 141.046 36.8069   2 
   4  -8   1 137.234 24.8302   1 
  -4  -8  -1 87.3644 29.1812   2 
  -4  -8  -1 134.655 21.1911   1 
   4   8   1 103.200 21.0285   3 
  -4   8  -1 121.336 24.4448   3 
   6  -8   1 43.2663 25.0992   1 
  -6  -8  -1 23.7865 22.3077   2 
  -6  -8  -1 54.0199 16.7138   1 
  -6   8  -1 43.7305 25.1742   2 
  -6   8  -1 50.0362 20.2840   3 
   6   8   1 54.2581 15.9917   3 
   8  -8   1 10.9444 25.5029   1 
  -8  -8  -1 53.9892 26.3621   2 
   8   8   1 63.3767 15.5240   3 
   8   8   1 112.376 24.7998   1 
  -8   8  -1 78.1553 30.9053   2 
  -8   8  -1 66.1376 19.8649   3 
 -10  -8  -1 7.35557 19.4270   2 
  10  -8   1 -63.840 24.6689   1 
  10   8   1 51.3932 22.8561   1 
 -10   8  -1 1.42351 28.5334   2 
 -11  -9   1 -0.8472 24.6838   2 
  11  -9  -1 -100.23 31.8324   1 
  11   9  -1 44.4105 22.7122   1 
 -11   9   1 58.1631 37.9240   2 
   9  -9  -1 -31.958 31.6127   1 
  -9  -9   1 27.8367 24.8448   2 
  -9   9   1 -1.7402 17.9907   3 
   9   9  -1 22.0047 18.1483   1 
  -9   9   1 -14.506 27.0787   2 
  -7  -9   1 10.3691 21.8186   2 
   7  -9  -1 -20.277 27.9784   1 
   7   9  -1 24.4695 16.4134   1 
   7   9  -1 10.4283 12.6144   3 
  -7   9   1 -0.8257 18.8794   3 
   5  -9  -1 34.7786 24.8807   1 
   5  -9  -1 2.35436 25.0825   2 
  -5  -9   1 40.9683 26.5341   2 
  -5   9   1 -13.870 18.7845   3 
   5   9  -1 1.74693 10.8831   1 
   5   9  -1 -26.253 12.3809   3 
  -3  -9   1 70.4608 34.5190   2 
  -3  -9   1 19.9802 13.1805   1 
   3  -9  -1 31.0118 29.7037   2 
   3  -9  -1 37.7393 18.9987   1 
  -3   9   1 44.3431 19.0492   3 
   3   9  -1 39.8259 16.7964   3 
  -1  -9   1 60.2760 13.1100   1 
   1  -9  -1 84.0251 33.0173   2 
   1  -9  -1 42.8297 15.9375   1 
  -1  -9   1 66.4076 35.9200   2 
   1   9  -1 45.5758 18.2524   3 
  -1   9   1 38.1602 17.1792   3 
  -1  -9  -1 171.428 38.9036   2 
   1  -9   1 193.722 43.5441   2 
   1  -9   1 166.395 17.4988   1 
  -1  -9  -1 175.448 21.2074   1 
  -1   9  -1 103.735 25.3143   3 
   1   9   1 181.483 26.3919   3 
   3  -9   1 128.401 37.3267   2 
   3  -9   1 54.4494 16.5722   1 
  -3  -9  -1 93.5933 19.6430   1 
  -3  -9  -1 73.9873 30.2243   2 
   3   9   1 70.5140 19.1506   3 
  -3   9  -1 73.4892 22.0412   3 
  -5  -9  -1 70.8174 26.5252   2 
  -5  -9  -1 63.3164 18.7431   1 
   5  -9   1 48.9738 23.3431   1 
   5  -9   1 54.8150 32.1122   2 
   5   9   1 40.3922 17.8747   3 
  -5   9  -1 25.6274 20.6467   3 
   7  -9   1 74.0243 35.0137   2 
   7  -9   1 -18.194 25.7398   1 
  -7  -9  -1 28.6090 22.8220   2 
   7   9   1 24.9890 14.4589   3 
   7   9   1 29.8995 16.5701   1 
  -7   9  -1 14.3730 19.8626   3 
  -9  -9  -1 28.1288 24.0519   2 
   9   9   1 4.13335 16.6447   1 
  -9   9  -1 26.9950 29.1185   2 
  -9   9  -1 16.0594 16.8882   3 
 -11  -9  -1 45.1441 26.7589   2 
  11   9   1 -10.343 20.5705   1 
 -11   9  -1 16.4210 34.0217   2 
 -10 -10   1 -6.3874 24.0947   2 
 -10  10   1 -7.6964 31.3861   2 
  10  10  -1 1.86052 18.3922   1 
   8 -10  -1 67.6995 32.9597   2 
  -8 -10   1 41.2295 25.4843   2 
  -8  10   1 -18.318 18.4920   3 
   8  10  -1 -24.988 12.9884   1 
   8  10  -1 -15.097 11.0116   3 
   6 -10  -1 169.276 32.0030   1 
   6 -10  -1 164.743 41.3834   2 
  -6 -10   1 157.986 36.2275   2 
   6  10  -1 125.742 22.9623   3 
  -6  10   1 215.348 31.6847   3 
   6  10  -1 146.363 23.4632   1 
   4 -10  -1 -42.342 25.7926   2 
   4 -10  -1 54.6596 19.9140   1 
  -4 -10   1 19.2783 27.5128   2 
  -4  10   1 -16.399 15.3708   3 
   4  10  -1 21.1022 16.9998   3 
  -2 -10   1 -3.4532 31.3813   2 
   2 -10  -1 11.0748 14.7608   1 
  -2 -10   1 9.17705 11.7718   1 
   2 -10  -1 -34.011 28.4501   2 
   2  10  -1 -8.7702 15.5940   3 
  -2  10   1 -1.3674 15.4369   3 
   0 -10  -1 44.6060 32.8276   2 
   0 -10   1 77.7215 37.3960   2 
   0 -10  -1 65.5672 17.2725   1 
   0  10   1 46.6079 19.3013   3 
   0  10  -1 15.1017 17.8248   3 
   2 -10   1 -15.924 31.6148   2 
  -2 -10  -1 3.14655 13.0076   1 
  -2 -10  -1 41.4313 29.2125   2 
  -2  10  -1 -18.337 17.4829   3 
   2  10   1 14.7263 16.3246   3 
   4 -10   1 30.7516 34.7652   2 
  -4 -10  -1 76.3422 29.3082   2 
  -4 -10  -1 31.8995 16.6602   1 
  -4  10  -1 43.4292 21.4606   3 
   4  10   1 26.2707 17.2996   3 
  -6 -10  -1 51.3708 23.8789   2 
   6 -10   1 50.6814 34.4608   2 
   6  10   1 57.2901 19.3523   3 
  -6  10  -1 67.6711 27.6039   3 
  -8 -10  -1 53.1379 28.6973   2 
   8 -10   1 44.1363 32.3079   2 
   8  10   1 -3.4149 14.0602   3 
  -8  10  -1 0.42674 20.5275   3 
   8  10   1 16.7075 18.4434   1 
 -10 -10  -1 80.4294 31.1115   2 
  10  10   1 97.6304 28.0075   1 
  -9 -11   1 42.1054 28.7278   2 
   9 -11  -1 91.3625 40.1481   2 
  -9  11   1 27.5004 24.1726   3 
   9  11  -1 -31.922 18.6612   1 
   7 -11  -1 12.4425 34.1979   2 
  -7 -11   1 41.6000 28.6897   2 
   7  11  -1 -3.3723 15.4736   3 
  -7  11   1 6.22984 21.1052   3 
   5 -11  -1 133.124 43.3146   2 
  -5 -11   1 131.852 35.2412   2 
   5  11  -1 73.3021 23.4618   3 
  -5  11   1 146.118 31.9595   3 
  -3 -11   1 84.3437 35.3922   2 
   3 -11  -1 69.9500 39.6962   2 
  -3  11   1 94.4274 27.2127   3 
   3  11  -1 75.7188 22.9906   3 
  -1 -11   1 134.389 41.9915   2 
   1 -11  -1 66.7112 35.4590   2 
  -1  11   1 123.136 27.4842   3 
   1  11  -1 91.2491 26.4708   3 
   1 -11   1 -25.825 34.3605   2 
  -1 -11  -1 1.53104 15.6195   1 
  -1 -11  -1 15.7313 32.8318   2 
  -1  11  -1 -44.611 19.9494   3 
   1  11   1 5.16915 18.4725   3 
  -3 -11  -1 38.4161 29.8388   2 
  -3 -11  -1 7.88012 15.4116   1 
   3 -11   1 4.66920 35.7140   2 
  -3  11  -1 -7.7864 20.1498   3 
   3  11   1 19.5644 18.6701   3 
   5 -11   1 7.80174 37.2020   2 
  -5 -11  -1 51.7629 19.6809   1 
  -5 -11  -1 149.121 33.3677   2 
   5  11   1 23.0336 18.6331   3 
  -5  11  -1 96.6089 30.3386   3 
  -7 -11  -1 19.3222 22.3356   2 
   7 -11   1 -14.746 34.3104   2 
  -7  11  -1 19.4771 25.1331   3 
   7  11   1 2.41703 15.3296   1 
   7  11   1 4.29315 16.8739   3 
  -9 -11  -1 53.7312 28.2999   2 
   9 -11   1 5.10753 37.0052   2 
  -9  11  -1 53.6881 24.7689   3 
   9  11   1 -2.1728 18.6642   1 
   8 -12  -1 70.3009 47.3264   2 
  -8 -12   1 71.8325 32.7833   2 
   8  12  -1 -1.8932 17.3902   3 
  -8  12   1 30.0895 24.1395   3 
  -6 -12   1 47.2395 32.7058   2 
   6 -12  -1 -5.7393 37.9457   2 
  -6  12   1 97.6910 27.4311   3 
   6  12  -1 35.9394 21.2326   3 
   4 -12  -1 -19.932 36.4486   2 
  -4 -12   1 49.3789 31.4887   2 
  -4  12   1 39.0910 24.0682   3 
   4  12  -1 -30.871 16.4212   3 
  -2 -12   1 -26.698 33.4218   2 
   2 -12  -1 -0.1994 36.6872   2 
   2  12  -1 56.5848 22.6306   3 
  -2  12   1 19.2159 22.2944   3 
   0 -12  -1 64.8757 39.3641   2 
   0 -12   1 105.772 44.8793   2 
   0  12  -1 57.0375 25.6029   3 
   0  12   1 89.3136 26.6065   3 
   2 -12   1 -26.526 38.2510   2 
  -2 -12  -1 -10.379 29.1696   2 
  -2  12  -1 16.1285 22.3497   3 
   2  12   1 0.68212 19.9503   3 
  -4 -12  -1 70.4063 28.9637   2 
   4 -12   1 9.46276 41.1699   2 
   4  12   1 40.7811 22.2468   3 
  -4  12  -1 83.6861 27.7791   3 
  -6 -12  -1 54.2929 27.7825   2 
   6 -12   1 36.0057 43.6569   2 
   6  12   1 -17.350 18.2379   3 
  -6  12  -1 50.8178 27.7415   3 
  -8 -12  -1 12.5881 24.1082   2 
   8 -12   1 -25.717 39.8014   2 
  -8  12  -1 -5.6191 22.4994   3 
   5 -13  -1 -24.627 41.7996   2 
  -5 -13   1 84.8962 33.3378   2 
  -5  13   1 -21.078 23.2982   3 
   5  13  -1 -31.900 20.1801   3 
   3 -13  -1 -18.456 40.9994   2 
  -3 -13   1 53.2303 36.9803   2 
  -3  13   1 0.52146 24.6831   3 
   3  13  -1 27.7811 20.6658   3 
  -1 -13   1 58.0290 41.4871   2 
   1 -13  -1 13.4723 39.2354   2 
  -1  13   1 31.9890 26.7412   3 
   1  13  -1 91.2800 27.3195   3 
  -1 -13  -1 41.3039 36.0813   2 
   1 -13   1 28.5252 44.2434   2 
   1  13   1 26.7434 23.5089   3 
  -1  13  -1 -3.9435 23.9545   3 
  -3 -13  -1 68.3866 30.9427   2 
   3 -13   1 -10.332 44.0774   2 
   3  13   1 32.3310 23.2946   3 
  -3  13  -1 -4.5875 25.1488   3 
  -5 -13  -1 67.3972 27.5531   2 
   5 -13   1 32.7912 47.0948   2 
   5  13   1 19.1433 21.6925   3 
  -5  13  -1 21.2373 27.8586   3 
   4 -14  -1 -1.0993 50.7521   2 
  -4 -14   1 104.504 38.7267   2 
   4  14  -1 26.8128 24.5614   3 
  -4  14   1 10.8385 25.3203   3 
   2 -14  -1 -34.350 42.3051   2 
  -2 -14   1 49.3967 40.8759   2 
  -2  14   1 -30.835 22.9350   3 
   2  14  -1 17.3681 23.6952   3 
   0 -14   1 21.8396 43.4077   2 
   0 -14  -1 56.2762 43.5567   2 
   0  14  -1 113.546 32.5619   3 
   0  14   1 100.424 30.5787   3 
   2 -14   1 -4.6216 50.3352   2 
  -2 -14  -1 49.4221 31.9343   2 
  -2  14  -1 4.38164 24.0241   3 
   2  14   1 -8.2949 21.7477   3 
  -4 -14  -1 103.793 32.0977   2 
   4 -14   1 9.45523 51.7997   2 
  -4  14  -1 25.2172 26.0441   3 
   4  14   1 -34.588 21.2844   3 
  14   0  -2 -31.966 19.5159   1 
 -14   0   2 18.9344 22.7851   2 
 -12   0   2 195.742 36.1290   2 
  12   0  -2 147.367 29.5814   1 
  10   0  -2 24.4840 15.7440   1 
 -10   0   2 20.5906 18.8124   2 
  -8   0   2 -9.0868 13.0603   2 
   8   0  -2 18.2608 11.7903   1 
  -6   0   2 609.144 39.1275   2 
   6   0  -2 629.185 36.5600   1 
  -4   0   2 28.1862 10.7742   2 
   4   0  -2 27.2488 8.56118   1 
   2   0  -2 20.0433 5.97992   1 
  -2   0   2 10.0382 7.20317   2 
  -2   0   2 9.60803 3.76872   3 
   2   0  -2 9.78293 3.66294   3 
   0   0   2 274.748 14.3589   3 
   0   0  -2 296.640 14.5573   3 
   0   0   2 302.398 14.6851   1 
   0   0   2 307.395 14.3808   2 
   0   0  -2 298.267 14.6498   1 
  -2   0  -2 677.333 32.9298   2 
  -2   0  -2 650.465 29.8261   3 
  -2   0  -2 717.306 32.4777   1 
  -4   0  -2 9999.99 373.195   3 
  -4   0  -2 9501.06 380.886   2 
   4   0   2 9608.77 379.363   1 
   6   0   2 65.5551 8.25231   3 
   6   0   2 66.1043 13.9962   1 
  -6   0  -2 64.3932 16.0787   2 
  -8   0  -2 215.602 27.0521   2 
   8   0   2 259.868 26.5149   1 
  10   0   2 241.263 28.9155   1 
 -10   0  -2 288.676 39.0664   2 
  12   0   2 50.0197 21.0096   1 
 -12   0  -2 46.2415 27.0170   2 
 -14   0  -2 34.9814 27.5086   2 
  13  -1  -2 27.3300 22.9609   1 
 -13  -1   2 34.9269 22.8183   2 
  13   1  -2 2.31940 18.6014   1 
 -13   1   2 9.99543 23.1586   2 
  11  -1  -2 512.038 44.1323   1 
 -11  -1   2 550.835 47.2549   2 
  11   1  -2 505.803 42.2999   1 
 -11   1   2 520.129 46.7402   2 
  -9  -1   2 8.92164 14.8780   2 
   9  -1  -2 24.4647 15.2384   1 
  -9   1   2 26.6887 17.5895   2 
   9   1  -2 1.56190 11.8785   1 
  -7  -1   2 166.304 25.6317   2 
   7  -1  -2 185.555 21.0857   1 
  -7   1   2 198.155 26.6594   2 
   7   1  -2 154.700 20.9931   1 
   5  -1  -2 2020.85 88.0523   1 
  -5  -1   2 2048.01 91.4706   2 
   5  -1  -2 2031.69 79.6619   3 
  -5   1   2 1883.86 89.3030   2 
   5   1  -2 2059.43 87.8164   1 
  -5   1   2 1975.44 79.0354   3 
   3  -1  -2 3762.50 145.681   1 
  -3  -1   2 3700.99 148.343   2 
  -3  -1   2 3787.34 141.130   3 
   3   1  -2 3473.67 140.702   3 
   3   1  -2 3724.74 145.351   1 
  -3   1   2 3529.84 146.330   2 
  -3   1   2 3501.25 141.516   3 
  -1  -1   2 1794.80 70.2659   2 
   1  -1  -2 1692.50 68.4960   1 
   1  -1  -2 1614.11 66.3663   2 
  -1  -1   2 1660.07 66.5096   1 
   1   1  -2 1722.92 66.5522   1 
  -1   1   2 1611.04 67.6333   3 
   1   1  -2 1804.43 67.2503   3 
  -1   1   2 1560.53 66.2039   2 
  -1  -1  -2 39.3743 7.81297   1 
  -1  -1  -2 48.4123 6.59287   2 
   1  -1   2 29.9691 5.28270   1 
  -1   1  -2 30.6866 5.51775   1 
  -1   1  -2 39.2457 5.88526   3 
  -1   1  -2 40.4147 8.13425   2 
   1   1   2 45.4392 7.06671   2 
   1   1   2 41.1796 6.61501   3 
   3  -1   2 40.9569 8.39861   1 
  -3  -1  -2 48.3023 11.1020   2 
  -3  -1  -2 51.8347 10.0366   1 
  -3   1  -2 48.5491 10.9861   2 
  -3   1  -2 44.7790 6.70645   3 
   3   1   2 67.9600 7.86657   3 
  -5  -1  -2 1206.20 59.5664   2 
   5  -1   2 1157.78 57.0584   1 
  -5   1  -2 1183.95 50.0875   3 
  -5   1  -2 1147.33 59.3576   2 
   5   1   2 1160.86 57.5006   1 
   5   1   2 1224.36 49.8363   3 
   7  -1   2 19.1692 10.6005   1 
  -7  -1  -2 9.27608 13.4622   2 
   7   1   2 15.7845 10.1447   1 
  -7   1  -2 7.86327 11.6743   2 
  -7   1  -2 11.0490 5.07005   3 
  -9  -1  -2 202.735 31.3255   2 
   9  -1   2 173.220 26.4571   1 
   9   1   2 155.154 26.1817   1 
  -9   1  -2 129.704 27.9721   2 
  11  -1   2 185.366 31.4077   1 
 -11  -1  -2 240.316 39.4086   2 
 -11   1  -2 149.459 31.0952   2 
  11   1   2 195.172 31.8276   1 
 -13  -1  -2 -22.260 19.3527   2 
  13  -1   2 -4.4924 18.9784   1 
  13   1   2 -4.1742 15.7985   1 
 -13   1  -2 -29.666 17.9159   2 
 -14  -2   2 49.1018 27.6157   2 
  14  -2  -2 6.53903 24.0450   1 
  14   2  -2 0.35639 19.7989   1 
 -14   2   2 -14.654 22.5636   2 
 -12  -2   2 157.967 33.5801   2 
  12  -2  -2 114.277 27.9211   1 
  12   2  -2 108.728 26.5261   1 
 -12   2   2 105.581 30.3364   2 
 -10  -2   2 55.5961 22.5289   2 
  10  -2  -2 36.9140 19.6976   1 
 -10   2   2 29.9560 18.4487   2 
  10   2  -2 48.0042 16.7136   1 
   8  -2  -2 419.811 33.2989   1 
  -8  -2   2 434.656 36.6314   2 
  -8   2   2 432.747 36.3736   2 
   8   2  -2 443.118 32.8698   1 
   6  -2  -2 527.461 32.9421   1 
  -6  -2   2 471.837 35.1659   2 
  -6   2   2 472.297 33.9148   2 
   6   2  -2 514.767 32.2444   1 
  -6   2   2 512.693 24.4114   3 
  -4  -2   2 -15.607 9.94167   2 
   4  -2  -2 5.47521 7.52155   1 
   4   2  -2 -2.3534 5.78993   1 
   4   2  -2 0.84086 3.46794   3 
  -4   2   2 -4.8763 4.92371   3 
  -4   2   2 -0.3164 7.44501   2 
   2  -2  -2 3279.37 130.886   1 
  -2  -2   2 3424.66 134.754   2 
  -2   2   2 3257.42 130.210   2 
  -2   2   2 2844.36 128.910   3 
   2   2  -2 3455.45 129.349   1 
   2   2  -2 3387.73 128.917   3 
   0  -2  -2 1676.14 68.3823   1 
   0  -2   2 1631.40 71.2863   2 
   0  -2  -2 1688.07 65.8943   2 
   0   2  -2 1614.30 67.2117   3 
   0   2   2 1641.60 67.5541   3 
   0   2   2 1568.87 65.5106   2 
   2  -2   2 2431.18 100.718   1 
  -2  -2  -2 2581.17 103.694   1 
  -2  -2  -2 2546.73 102.988   2 
  -2   2  -2 2584.48 105.169   2 
  -2   2  -2 2455.44 101.175   3 
   2   2   2 2526.68 101.229   3 
  -4  -2  -2 1050.07 50.2644   1 
   4  -2   2 989.294 48.2423   1 
  -4  -2  -2 1010.49 50.8126   2 
  -4   2  -2 993.975 51.4901   2 
  -4   2  -2 1023.58 44.5400   3 
   4   2   2 1011.35 44.1200   3 
   6  -2   2 329.647 25.9070   1 
  -6  -2  -2 354.361 29.0492   2 
   6   2   2 326.510 26.3113   1 
  -6   2  -2 356.471 29.2102   2 
  -6   2  -2 348.868 19.8660   3 
   6   2   2 380.270 19.3092   3 
   8  -2   2 92.9312 19.5747   1 
  -8  -2  -2 92.2026 22.2712   2 
  -8   2  -2 110.455 23.6840   2 
   8   2   2 94.7004 19.4546   1 
  -8   2  -2 86.6471 10.8007   3 
 -10  -2  -2 444.927 42.4936   2 
  10  -2   2 390.706 37.0707   1 
 -10   2  -2 443.799 42.0674   2 
  10   2   2 441.377 39.0720   1 
 -12  -2  -2 19.0158 19.8450   2 
  12  -2   2 0.96506 17.4709   1 
  12   2   2 2.03546 15.2729   1 
 -12   2  -2 25.6617 23.7440   2 
  13  -3  -2 20.8117 23.5411   1 
 -13  -3   2 37.3749 23.5821   2 
  13   3  -2 7.82212 19.3898   1 
 -13   3   2 -8.8645 20.7200   2 
  11  -3  -2 126.696 27.6811   1 
 -11  -3   2 142.369 30.8852   2 
 -11   3   2 170.173 32.4535   2 
  11   3  -2 173.624 29.1043   1 
   9  -3  -2 53.2496 18.9312   1 
  -9  -3   2 41.4404 20.6135   2 
  -9   3   2 61.0542 20.3594   2 
   9   3  -2 59.6257 17.8064   1 
  -7  -3   2 6.01436 13.1838   2 
   7  -3  -2 11.1757 12.9437   1 
   7   3  -2 6.16404 8.76230   1 
  -7   3   2 4.16097 12.5091   2 
  -7   3   2 1.38196 6.62900   3 
   5  -3  -2 1862.24 85.3444   1 
  -5  -3   2 1885.95 90.0726   2 
   5   3  -2 1925.19 85.1481   1 
   5   3  -2 1846.21 78.0178   3 
  -5   3   2 2001.24 88.1224   2 
  -5   3   2 2023.53 80.6341   3 
   3  -3  -2 319.466 21.3789   1 
  -3  -3   2 266.766 23.8427   2 
  -3   3   2 264.390 19.5550   2 
   3   3  -2 260.839 17.7284   1 
  -3   3   2 271.493 18.0198   3 
   3   3  -2 279.277 16.6329   3 
   1  -3  -2 6783.49 260.156   1 
   1  -3  -2 7110.85 259.983   2 
  -1  -3   2 6946.14 264.990   2 
   1   3  -2 6492.33 255.578   1 
   1   3  -2 6480.65 259.421   3 
   1   3  -2 6701.19 255.651   1 
  -1   3   2 6082.66 259.538   3 
   1  -3   2 154.132 20.3164   2 
  -1  -3  -2 129.492 14.6597   2 
  -1  -3  -2 119.033 13.6375   1 
  -1   3  -2 133.806 12.6633   3 
   1   3   2 129.034 13.1859   3 
  -3  -3  -2 29.1317 11.2220   2 
   3  -3   2 27.8553 7.63092   1 
  -3  -3  -2 24.8648 9.10888   1 
  -3   3  -2 15.1486 7.21840   3 
  -3   3  -2 25.7031 10.9588   2 
   3   3   2 14.9178 6.84984   3 
   5  -3   2 1292.11 61.9093   1 
  -5  -3  -2 1328.99 64.2250   1 
  -5  -3  -2 1276.83 65.4887   2 
   5   3   2 1433.11 57.8579   3 
  -5   3  -2 1313.68 58.1637   3 
  -5   3  -2 1273.67 66.9556   2 
  -7  -3  -2 29.3782 13.9748   2 
   7  -3   2 0.69897 9.37821   1 
   7   3   2 1.96774 5.73556   3 
  -7   3  -2 28.7944 9.13435   3 
  -7   3  -2 2.97834 12.7839   2 
   7   3   2 2.59829 8.88683   1 
   9  -3   2 37.2447 16.1152   1 
  -9  -3  -2 59.8306 21.4101   2 
   9   3   2 30.0171 16.4245   1 
  -9   3  -2 14.9686 19.1277   2 
  11  -3   2 169.197 30.8380   1 
 -11  -3  -2 222.348 35.5411   2 
 -11   3  -2 187.465 36.3031   2 
  11   3   2 191.775 32.1005   1 
 -13  -3  -2 15.8845 25.2999   2 
  13  -3   2 0.57827 19.6059   1 
  13   3   2 14.7828 19.7737   1 
 -13   3  -2 -24.550 22.0184   2 
 -14  -4   2 -25.743 21.1068   2 
 -14   4   2 1.10492 26.8343   2 
  12  -4  -2 133.960 31.4938   1 
 -12  -4   2 120.621 30.6248   2 
  12   4  -2 185.219 31.7162   1 
 -12   4   2 108.522 30.1027   2 
  10  -4  -2 -23.809 15.9748   1 
 -10  -4   2 3.80166 16.1985   2 
  10   4  -2 -3.1220 12.2667   1 
 -10   4   2 33.5485 21.4744   2 
   8  -4  -2 46.2011 18.3612   1 
  -8  -4   2 25.8981 19.1021   2 
   8   4  -2 53.8335 16.1664   1 
  -8   4   2 17.2292 9.77747   3 
   8   4  -2 30.1275 6.51847   3 
  -8   4   2 31.2149 18.3092   2 
   6  -4  -2 237.607 23.7419   1 
  -6  -4   2 172.684 27.1092   2 
  -6   4   2 172.787 17.4257   3 
  -6   4   2 169.891 22.0124   2 
   6   4  -2 157.582 19.3019   1 
   6   4  -2 141.386 13.4455   3 
  -4  -4   2 33.5119 16.3991   2 
   4  -4  -2 72.3694 15.6040   1 
  -4   4   2 45.1600 10.1965   3 
   4   4  -2 63.4258 9.89900   3 
  -4   4   2 60.6732 14.4730   2 
   4   4  -2 56.5319 10.5445   1 
   2  -4  -2 191.208 19.1373   1 
  -2  -4   2 227.264 27.3527   2 
   2   4  -2 196.761 15.3695   3 
  -2   4   2 168.941 16.4668   3 
  -2   4   2 215.077 17.2487   2 
   2   4  -2 173.609 12.6746   1 
   0  -4  -2 890.242 42.1716   2 
   0  -4   2 783.714 46.2289   2 
   0  -4  -2 823.124 39.6699   1 
   0   4  -2 751.739 39.1470   3 
   0   4   2 798.069 39.8802   3 
  -2  -4  -2 -2.4060 9.68592   2 
   2  -4   2 6.37764 5.51615   1 
  -2  -4  -2 9.61586 7.45818   1 
  -2   4  -2 7.07292 6.80950   3 
   2   4   2 1.57529 7.15449   3 
  -4  -4  -2 3157.22 135.211   1 
  -4  -4  -2 3210.47 136.922   2 
   4  -4   2 3157.99 131.942   1 
  -4   4  -2 3246.21 132.333   3 
  -4   4  -2 3251.67 139.466   2 
   4   4   2 3330.23 131.684   3 
   6  -4   2 17.4237 10.7540   1 
  -6  -4  -2 7.57631 10.5890   1 
  -6  -4  -2 -10.079 11.9486   2 
  -6   4  -2 8.27106 7.94562   3 
   6   4   2 17.5437 7.57280   3 
  -6   4  -2 11.5579 13.9380   2 
  -8  -4  -2 65.7350 22.5981   2 
   8  -4   2 65.2835 18.8620   1 
  -8   4  -2 54.7636 20.9657   2 
   8   4   2 41.8340 15.8737   1 
  -8   4  -2 60.4045 12.5505   3 
   8   4   2 57.1249 9.60450   3 
  10  -4   2 277.866 32.4055   1 
 -10  -4  -2 215.295 35.2691   2 
 -10   4  -2 288.045 42.6903   2 
  10   4   2 266.347 32.0797   1 
 -12  -4  -2 25.8472 24.0129   2 
  12  -4   2 -2.1365 20.8141   1 
 -12   4  -2 -16.678 22.1770   2 
  12   4   2 11.5644 16.3952   1 
 -13  -5   2 21.7740 23.3731   2 
 -13   5   2 9.15040 27.6534   2 
  13   5  -2 3.60962 19.9353   1 
 -11  -5   2 108.124 29.3636   2 
  11  -5  -2 171.961 33.8535   1 
 -11   5   2 200.729 37.7347   2 
  11   5  -2 183.958 31.3562   1 
   9  -5  -2 9.13277 19.7905   1 
  -9  -5   2 -8.0791 16.4853   2 
  -9   5   2 24.2665 10.8106   3 
  -9   5   2 -5.5618 17.8933   2 
   9   5  -2 -5.1561 11.9110   1 
   7  -5  -2 214.948 28.9981   1 
  -7  -5   2 231.800 34.9604   2 
   7   5  -2 218.129 17.3300   3 
  -7   5   2 228.614 31.5960   2 
  -7   5   2 185.589 21.5032   3 
   7   5  -2 220.275 22.7440   1 
   5  -5  -2 817.475 45.7536   1 
  -5  -5   2 734.281 49.6823   2 
  -5   5   2 790.056 41.7846   3 
  -5   5   2 836.930 47.0306   2 
   5   5  -2 706.589 38.0138   3 
   5   5  -2 765.963 41.3722   1 
  -3  -5   2 875.873 51.7315   2 
   3  -5  -2 817.943 44.9183   1 
  -3   5   2 870.444 45.1351   2 
  -3   5   2 838.358 43.1286   3 
   3   5  -2 844.316 41.4993   3 
   3   5  -2 797.107 39.6579   1 
   1  -5  -2 1020.38 50.8360   2 
  -1  -5   2 919.041 56.6611   2 
   1  -5  -2 957.236 47.2583   1 
  -1  -5   2 897.361 40.5098   1 
   1   5  -2 953.095 47.6597   3 
  -1   5   2 1053.48 49.0191   3 
  -1  -5  -2 911.557 47.9403   2 
   1  -5   2 819.419 52.4996   2 
  -1  -5  -2 958.766 45.3969   1 
   1   5   2 935.535 46.1239   3 
  -1   5  -2 900.121 45.7977   3 
  -3  -5  -2 208.865 20.0663   1 
  -3  -5  -2 211.072 22.6952   2 
   3  -5   2 213.152 16.7404   1 
  -3   5  -2 203.697 24.4162   2 
   3   5   2 165.598 17.8550   3 
  -3   5  -2 217.935 19.1347   3 
  -5  -5  -2 788.589 45.1278   1 
   5  -5   2 752.551 41.3401   1 
  -5  -5  -2 769.317 47.1315   2 
  -5   5  -2 753.271 41.2430   3 
   5   5   2 849.835 40.8624   3 
  -5   5  -2 725.247 48.9248   2 
   7  -5   2 38.1791 15.5146   1 
  -7  -5  -2 23.6861 19.3151   2 
  -7   5  -2 47.4744 20.2030   2 
   7   5   2 12.7228 12.4981   1 
  -7   5  -2 52.6115 13.2445   3 
   7   5   2 28.4755 10.1073   3 
   9  -5   2 103.863 23.3210   1 
  -9  -5  -2 96.1487 25.8970   2 
  -9   5  -2 123.775 29.2983   2 
  -9   5  -2 73.7590 22.8696   3 
   9   5   2 85.5853 22.2833   1 
 -11  -5  -2 43.7755 25.3872   2 
  11  -5   2 26.2677 20.9143   1 
  11   5   2 26.9419 19.9089   1 
 -11   5  -2 48.5989 27.8817   2 
 -13  -5  -2 -0.0386 25.5421   2 
  13  -5   2 -25.176 20.7751   1 
  13   5   2 28.3364 20.6624   1 
 -13   5  -2 -8.3636 26.0986   2 
 -12  -6   2 62.1396 25.9874   2 
  12  -6  -2 76.4378 30.8966   1 
  12   6  -2 47.8836 23.2351   1 
 -12   6   2 79.0462 31.3290   2 
 -10  -6   2 3.94569 18.8928   2 
  10  -6  -2 -12.989 21.1034   1 
  10   6  -2 9.47433 16.0527   1 
 -10   6   2 20.7013 21.9436   2 
   8  -6  -2 155.023 29.6610   1 
  -8  -6   2 155.755 31.2308   2 
  -8   6   2 188.997 22.1618   3 
   8   6  -2 244.465 26.2375   1 
  -8   6   2 168.269 30.4619   2 
   8   6  -2 183.213 16.8725   3 
  -6  -6   2 480.640 43.4327   2 
   6  -6  -2 574.806 42.8016   1 
   6   6  -2 599.008 36.7878   1 
   6   6  -2 520.894 32.9778   3 
  -6   6   2 600.159 37.1782   3 
  -6   6   2 597.727 42.5670   2 
  -4  -6   2 57.5097 23.8884   2 
   4  -6  -2 44.8329 19.2622   1 
  -4   6   2 51.6509 16.0809   3 
   4   6  -2 66.7242 13.2525   3 
  -4   6   2 65.8449 18.9581   2 
   4   6  -2 46.6342 11.6257   1 
   2  -6  -2 321.123 26.6346   1 
   2  -6  -2 356.546 30.9347   2 
  -2  -6   2 302.806 37.2829   2 
  -2   6   2 321.385 26.1897   3 
   2   6  -2 309.851 24.2922   3 
   0  -6  -2 112.907 22.8792   2 
   0  -6   2 103.883 27.2361   2 
   0  -6  -2 116.178 16.9848   1 
   0   6  -2 94.8674 17.1087   3 
   0   6   2 107.336 17.1420   3 
  -2  -6  -2 452.149 28.5824   1 
   2  -6   2 396.289 38.3238   2 
  -2  -6  -2 464.062 33.8629   2 
   2  -6   2 397.835 23.6978   1 
  -2   6  -2 464.377 30.4802   3 
   2   6   2 424.541 28.8597   3 
  -4  -6  -2 602.951 41.7351   2 
  -4  -6  -2 623.488 38.1429   1 
   4  -6   2 628.346 35.5028   1 
  -4   6  -2 658.597 44.7858   2 
  -4   6  -2 651.544 38.5192   3 
   4   6   2 631.848 36.4853   3 
   6  -6   2 3.40378 13.2764   1 
  -6  -6  -2 -9.0652 16.0072   2 
  -6  -6  -2 1.93545 13.5808   1 
   6   6   2 4.48322 9.10338   3 
  -6   6  -2 -16.048 11.6457   3 
  -6   6  -2 12.3897 20.1060   2 
  -8  -6  -2 50.9763 20.5359   2 
   8  -6   2 77.0708 20.6946   1 
   8   6   2 52.2335 17.1125   1 
  -8   6  -2 74.9645 17.0280   3 
   8   6   2 63.3593 12.8425   3 
  -8   6  -2 53.1042 23.9738   2 
  10  -6   2 267.297 36.4280   1 
 -10  -6  -2 256.386 40.4005   2 
  10   6   2 239.784 36.1036   1 
 -10   6  -2 250.301 43.0212   2 
 -12  -6  -2 32.4401 27.1098   2 
  12  -6   2 -44.182 17.2352   1 
  12   6   2 -11.292 16.4851   1 
 -12   6  -2 -31.905 25.2519   2 
 -11  -7   2 157.687 33.7330   2 
  11  -7  -2 124.518 35.1341   1 
  11   7  -2 213.950 33.6294   1 
 -11   7   2 253.472 43.3032   2 
  -9  -7   2 -11.112 19.3572   2 
   9  -7  -2 -44.738 22.0903   1 
  -9   7   2 6.44211 12.4328   3 
  -9   7   2 -12.466 22.0967   2 
   9   7  -2 0.90312 13.0681   1 
   7  -7  -2 -6.6704 24.3954   1 
  -7  -7   2 7.21667 20.1456   2 
   7   7  -2 -9.3530 9.25730   3 
   7   7  -2 -16.583 10.3137   1 
  -7   7   2 -27.227 13.9189   3 
  -7   7   2 -4.6143 21.1889   2 
   5  -7  -2 212.568 31.8995   1 
  -5  -7   2 210.686 36.1540   2 
  -5   7   2 221.078 32.0883   2 
   5   7  -2 140.888 21.0092   3 
  -5   7   2 141.667 23.6628   3 
   5   7  -2 203.404 20.8511   1 
   3  -7  -2 -6.6641 15.6100   1 
   3  -7  -2 -4.9426 19.4495   2 
  -3  -7   2 37.0711 26.3464   2 
  -3   7   2 37.1434 13.3199   3 
   3   7  -2 -1.6013 7.86177   1 
   3   7  -2 3.00206 10.0575   3 
  -1  -7   2 345.954 41.0299   2 
   1  -7  -2 347.315 35.8364   2 
   1  -7  -2 362.924 27.8391   1 
  -1  -7   2 324.619 19.1818   1 
  -1   7   2 355.404 29.2471   3 
   1   7  -2 324.861 27.5586   3 
   1  -7   2 -26.483 21.7433   2 
  -1  -7  -2 38.3189 14.1699   1 
  -1  -7  -2 44.0597 23.1755   2 
  -1   7  -2 47.3491 14.5700   3 
   1   7   2 28.4650 12.7094   3 
  -3  -7  -2 85.0989 23.8887   2 
  -3  -7  -2 86.2482 17.7643   1 
   3  -7   2 110.662 18.0147   1 
   3  -7   2 169.839 33.4544   2 
  -3   7  -2 129.476 20.5916   3 
   3   7   2 123.290 19.1711   3 
  -5  -7  -2 236.180 30.3873   2 
   5  -7   2 232.301 27.9087   1 
  -5  -7  -2 237.842 26.2518   1 
  -5   7  -2 233.296 27.3487   3 
  -5   7  -2 198.763 33.0053   2 
   5   7   2 211.256 23.6770   3 
  -7  -7  -2 -6.0714 16.4625   2 
   7  -7   2 2.24050 17.9981   1 
   7   7   2 9.48857 10.7938   3 
  -7   7  -2 21.6454 13.2482   3 
  -7   7  -2 3.84933 21.1588   2 
   9  -7   2 22.2303 21.5834   1 
  -9  -7  -2 29.8952 20.5429   2 
   9   7   2 38.3071 18.4455   1 
  -9   7  -2 53.5678 28.4735   2 
  -9   7  -2 25.4135 13.9186   3 
 -11  -7  -2 87.9689 31.5062   2 
  11  -7   2 61.7950 29.6597   1 
 -11   7  -2 86.1827 35.8609   2 
  11   7   2 165.598 33.8774   1 
  12  -8  -2 -27.006 32.3019   1 
 -12  -8   2 50.7319 27.9430   2 
 -12   8   2 8.68422 32.2201   2 
  12   8  -2 54.9701 23.9470   1 
  10  -8  -2 -77.348 25.9597   1 
 -10  -8   2 38.7295 22.8835   2 
 -10   8   2 -36.369 24.4922   2 
  10   8  -2 -0.1762 16.0807   1 
   8  -8  -2 -24.611 26.5314   1 
  -8  -8   2 -6.6691 22.0142   2 
   8   8  -2 -3.4649 13.3363   1 
  -8   8   2 4.04417 16.0624   3 
   8   8  -2 -5.9954 8.94451   3 
  -8   8   2 -6.8517 24.1222   2 
  -6  -8   2 6.14915 22.2848   2 
   6  -8  -2 25.4566 28.2360   1 
   6   8  -2 -21.265 10.7931   3 
   6   8  -2 5.17811 13.6103   1 
  -6   8   2 -23.965 15.3727   3 
  -6   8   2 -6.7967 21.2153   2 
   4  -8  -2 37.2434 26.3002   2 
   4  -8  -2 33.4394 22.9105   1 
  -4  -8   2 9.29420 28.3356   2 
  -4   8   2 14.8998 16.1295   3 
   4   8  -2 15.9165 13.4679   3 
   4   8  -2 50.4386 13.0313   1 
   2  -8  -2 223.028 34.4441   2 
  -2  -8   2 175.656 39.8343   2 
   2  -8  -2 177.037 24.7986   1 
   2   8  -2 195.337 25.6225   3 
  -2   8   2 150.673 24.0703   3 
   0  -8  -2 460.968 44.4216   2 
   0  -8   2 589.433 54.3190   2 
   0  -8  -2 497.744 34.5235   1 
   0   8   2 472.469 35.7999   3 
   0   8  -2 512.487 39.2304   3 
  -2  -8  -2 7.86558 22.3644   2 
   2  -8   2 15.6284 9.95284   1 
   2  -8   2 31.3035 28.3351   2 
  -2  -8  -2 28.3713 14.1729   1 
   2   8   2 4.74970 13.5033   3 
  -2   8  -2 15.7018 14.9407   3 
  -4  -8  -2 646.405 41.4284   1 
   4  -8   2 596.839 55.3954   2 
   4  -8   2 585.597 40.3131   1 
  -4  -8  -2 571.767 45.9375   2 
   4   8   2 654.747 41.5795   3 
  -4   8  -2 682.142 44.7790   3 
   6  -8   2 -14.497 20.8176   1 
  -6  -8  -2 3.30324 19.3660   2 
  -6  -8  -2 18.8355 14.9861   1 
  -6   8  -2 -25.050 13.8162   3 
   6   8   2 0.13868 11.9249   3 
   8  -8   2 -38.974 20.0689   1 
  -8  -8  -2 -3.4439 18.3911   2 
   8   8   2 -2.5641 10.8438   3 
   8   8   2 -6.1845 13.5648   1 
  -8   8  -2 -2.9435 13.8826   3 
  -8   8  -2 -15.695 24.6986   2 
 -10  -8  -2 63.0401 25.0741   2 
  10  -8   2 5.05959 25.6820   1 
  10   8   2 37.5302 21.3856   1 
 -10   8  -2 19.4840 29.8341   2 
  11  -9  -2 -68.704 34.2994   1 
 -11  -9   2 57.4809 30.6474   2 
 -11   9   2 13.3432 34.4118   2 
  11   9  -2 7.14811 17.4873   1 
  -9  -9   2 35.7151 26.5952   2 
   9  -9  -2 -20.014 30.9212   1 
  -9   9   2 41.9715 30.7194   2 
   9   9  -2 12.2620 16.1111   1 
  -9   9   2 -2.7544 18.1160   3 
  -7  -9   2 37.5924 28.2328   2 
   7  -9  -2 70.7699 32.4525   1 
  -7   9   2 47.8586 29.4794   2 
   7   9  -2 50.8382 17.4843   1 
   7   9  -2 33.9046 15.7649   3 
  -7   9   2 44.4267 22.3461   3 
  -5  -9   2 227.791 40.3886   2 
   5  -9  -2 206.477 40.3818   2 
   5  -9  -2 216.210 33.6352   1 
  -5   9   2 217.288 31.8242   3 
   5   9  -2 174.609 25.8978   3 
   5   9  -2 189.889 21.5463   1 
   3  -9  -2 70.6127 30.5309   2 
  -3  -9   2 58.2253 34.7727   2 
   3  -9  -2 45.5431 20.2302   1 
   3   9  -2 22.8078 16.1543   3 
  -3   9   2 30.7461 19.4180   3 
   3   9  -2 52.2705 10.8139   1 
  -1  -9   2 106.411 38.2089   2 
   1  -9  -2 142.398 23.5360   1 
   1  -9  -2 159.275 36.2582   2 
  -1  -9   2 123.713 14.0663   1 
  -1   9   2 136.456 24.2328   3 
   1   9  -2 129.729 24.5344   3 
  -1  -9  -2 107.873 21.5734   1 
  -1  -9  -2 74.3484 31.2919   2 
   1  -9   2 103.778 38.5877   2 
   1   9   2 100.575 22.6586   3 
  -1   9  -2 50.0308 21.7172   3 
  -3  -9  -2 12.6175 15.3285   1 
   3  -9   2 7.92902 31.9805   2 
  -3  -9  -2 -24.522 20.4134   2 
   3   9   2 -3.4665 14.1414   3 
  -3   9  -2 -12.553 15.5083   3 
   5  -9   2 173.254 42.2435   2 
  -5  -9  -2 119.519 24.2715   1 
  -5  -9  -2 159.934 30.5591   2 
   5   9   2 128.269 23.9354   3 
  -5   9  -2 127.061 26.4893   3 
   7  -9   2 -20.263 27.0755   2 
  -7  -9  -2 45.0560 25.1862   2 
   7   9   2 25.7855 14.6896   3 
  -7   9  -2 -1.8763 17.7918   3 
  -9  -9  -2 5.64601 19.7059   2 
  -9   9  -2 -26.915 27.3953   2 
   9   9   2 38.0131 20.7230   1 
  -9   9  -2 8.24376 17.7536   3 
 -10 -10   2 5.86965 22.6043   2 
  10  10  -2 7.54592 17.6014   1 
 -10  10   2 -26.655 33.3578   2 
   8 -10  -2 15.4830 34.7222   1 
  -8 -10   2 90.8441 32.1312   2 
   8 -10  -2 94.5766 35.7478   2 
   8  10  -2 19.2870 14.5463   3 
  -8  10   2 62.0668 23.9271   3 
  -6 -10   2 126.747 36.5882   2 
   6 -10  -2 142.347 38.1061   2 
   6 -10  -2 181.480 33.3570   1 
   6  10  -2 159.455 24.4715   1 
  -6  10   2 224.199 31.3930   3 
   6  10  -2 135.646 24.3382   3 
   4 -10  -2 37.2874 31.5022   2 
  -4 -10   2 47.2588 31.7984   2 
   4 -10  -2 28.1370 19.8825   1 
  -4  10   2 39.8374 19.1282   3 
   4  10  -2 28.0611 16.9019   3 
   4  10  -2 22.0960 20.8999   1 
   2 -10  -2 56.7410 19.7614   1 
  -2 -10   2 34.3872 36.0491   2 
   2 -10  -2 40.5235 31.8230   2 
  -2  10   2 56.6828 19.1713   3 
   2  10  -2 7.26862 16.9171   3 
   0 -10  -2 14.8958 30.9178   2 
   0 -10  -2 42.8013 18.3816   1 
   0 -10   2 37.7191 36.3202   2 
   0  10   2 28.1859 18.7072   3 
   0  10  -2 17.9835 18.1772   3 
  -2 -10  -2 22.4710 27.3483   2 
  -2 -10  -2 48.1504 18.4642   1 
   2 -10   2 63.6744 38.4954   2 
   2  10   2 58.6690 20.3864   3 
  -2  10  -2 11.0582 19.0661   3 
  -4 -10  -2 113.386 29.2303   2 
   4 -10   2 70.1304 38.0270   2 
  -4 -10  -2 90.7480 21.7574   1 
  -4  10  -2 99.1780 26.5558   3 
   4  10   2 50.6680 20.3538   3 
   6 -10   2 -3.3844 32.7473   2 
  -6 -10  -2 6.13976 20.3816   2 
  -6 -10  -2 -10.318 15.3222   1 
   6  10   2 5.23844 14.4379   3 
  -6  10  -2 -9.7014 19.8876   3 
  -8 -10  -2 -13.529 20.4581   2 
   8 -10   2 39.5638 35.8288   2 
  -8  10  -2 21.3962 20.0354   3 
   8  10   2 0.43960 17.4401   1 
   8  10   2 1.34393 14.3760   3 
 -10 -10  -2 156.239 37.4021   2 
  10  10   2 111.695 32.0829   1 
  -9 -11   2 9.95621 28.4965   2 
   9 -11  -2 102.170 41.0712   2 
  -9  11   2 20.8933 25.1344   3 
  -7 -11   2 70.0190 32.4039   2 
   7 -11  -2 6.08467 34.1759   2 
   7  11  -2 15.2198 17.6017   3 
  -7  11   2 -11.079 23.1014   3 
   5 -11  -2 4.07118 33.0197   2 
  -5 -11   2 56.0913 32.4175   2 
  -5  11   2 33.6636 23.1389   3 
   5  11  -2 -13.021 17.7978   3 
   3 -11  -2 36.0055 18.9347   1 
  -3 -11   2 19.8554 34.8361   2 
   3 -11  -2 23.7380 33.8097   2 
  -3  11   2 35.7766 22.1691   3 
   3  11  -2 37.9715 18.8932   3 
   1 -11  -2 147.163 41.0607   2 
  -1 -11   2 226.037 49.1016   2 
   1 -11  -2 290.520 29.4384   1 
   1  11  -2 248.270 33.5831   3 
   1 -11   2 42.5248 38.9168   2 
  -1 -11  -2 35.3258 30.8309   2 
  -1 -11  -2 10.9563 16.1856   1 
   1  11   2 23.2736 19.3411   3 
  -1  11  -2 -17.556 21.5525   3 
  -3 -11  -2 40.8875 25.9166   2 
   3 -11   2 -69.909 34.8704   2 
  -3 -11  -2 10.9477 15.9206   1 
  -3  11  -2 -36.904 17.4396   3 
   3  11   2 -18.027 15.3852   3 
   5 -11   2 51.3653 40.0157   2 
  -5 -11  -2 106.769 29.4461   2 
  -5 -11  -2 58.0045 21.2910   1 
  -5  11  -2 74.6923 27.4650   3 
   5  11   2 35.9287 20.3920   3 
   7 -11   2 -10.896 35.5841   2 
  -7 -11  -2 37.7759 25.1344   2 
   7  11   2 0.11572 16.8402   1 
   7  11   2 -3.1005 16.7520   3 
  -7  11  -2 32.4528 23.0244   3 
  -9 -11  -2 63.3234 28.9294   2 
   9 -11   2 95.8031 43.9594   2 
  -9  11  -2 34.2145 24.0136   3 
  -8 -12   2 21.8950 30.4323   2 
   8 -12  -2 19.7205 42.2692   2 
  -8  12   2 4.40330 21.2171   3 
   8  12  -2 -12.143 14.8992   3 
   6 -12  -2 -8.1067 38.8306   2 
  -6 -12   2 42.7335 32.1597   2 
   6  12  -2 -13.610 17.0035   3 
  -6  12   2 58.4115 24.1867   3 
  -4 -12   2 7.18585 28.8935   2 
   4 -12  -2 -76.547 33.1565   2 
  -4  12   2 22.0093 23.0038   3 
   4  12  -2 -0.5483 17.5685   3 
  -2 -12   2 46.9758 38.1249   2 
   2 -12  -2 38.0148 37.1230   2 
   2  12  -2 80.5338 24.0962   3 
  -2  12   2 81.9864 26.5312   3 
   0 -12   2 104.013 45.1348   2 
   0 -12  -2 78.5890 38.2451   2 
   0  12   2 105.730 26.8868   3 
   0  12  -2 44.9339 25.8827   3 
   2 -12   2 44.4438 43.0227   2 
  -2 -12  -2 47.2080 30.3963   2 
   2  12   2 -20.706 17.8388   3 
  -2  12  -2 9.55170 24.2226   3 
  -4 -12  -2 93.1772 29.0228   2 
   4 -12   2 75.7095 48.6728   2 
  -4 -12  -2 83.6167 23.7414   1 
   4  12   2 75.2279 24.3611   3 
  -4  12  -2 75.3606 29.2568   3 
  -6 -12  -2 23.4411 23.3086   2 
   6 -12   2 -9.2944 43.2345   2 
  -6  12  -2 54.0041 26.3649   3 
   6  12   2 -7.9333 17.0741   3 
  -5 -13   2 70.2950 33.3597   2 
   5 -13  -2 -76.179 38.1312   2 
   5  13  -2 -23.884 19.1212   3 
  -5  13   2 18.1957 27.2874   3 
   3 -13  -2 -39.104 38.2819   2 
  -3 -13   2 5.92468 36.2562   2 
  -3  13   2 -11.713 20.6962   3 
   3  13  -2 0.91620 19.3760   3 
  -1 -13   2 -23.402 37.6238   2 
   1 -13  -2 63.0611 41.9376   2 
  -1  13   2 18.4397 25.0828   3 
   1  13  -2 40.9670 24.5501   3 
  -1 -13  -2 60.0644 34.9153   2 
   1 -13   2 -17.019 42.9045   2 
   1  13   2 2.86053 23.1974   3 
  -1  13  -2 -43.868 21.5021   3 
  -3 -13  -2 53.0527 28.2760   2 
   3 -13   2 -6.2423 46.8926   2 
   3  13   2 12.1975 21.9614   3 
  -3  13  -2 26.5568 27.5096   3 
  -5 -13  -2 115.708 30.6682   2 
   5 -13   2 -38.541 44.4513   2 
   5  13   2 36.8120 23.4006   3 
  -5  13  -2 40.9165 27.4308   3 
   4 -14  -2 -34.953 43.8386   2 
  -4 -14   2 60.2483 34.8625   2 
  -4  14   2 -19.976 25.7823   3 
   4  14  -2 0.18783 21.8727   3 
  -2 -14   2 13.4031 40.3315   2 
   2 -14  -2 -26.213 41.0315   2 
  -2  14   2 -24.195 24.8639   3 
   2  14  -2 59.7453 27.5819   3 
   0 -14  -2 34.2533 37.9034   2 
   0 -14   2 -25.361 45.0079   2 
   0  14  -2 22.5790 26.9704   3 
   0  14   2 33.5060 25.8315   3 
   2 -14   2 -26.250 51.1255   2 
  -2 -14  -2 40.5261 32.9135   2 
   2  14   2 -10.704 21.8383   3 
  -2  14  -2 -16.817 24.5694   3 
  14   0  -3 36.2078 25.3792   1 
 -14   0   3 17.9413 25.9973   2 
 -12   0   3 223.863 38.6818   2 
  12   0  -3 171.845 31.0893   1 
 -10   0   3 -18.097 12.9273   2 
  10   0  -3 -5.1832 14.0021   1 
  -8   0   3 -14.902 13.7570   2 
   8   0  -3 10.4721 12.5739   1 
  -6   0   3 -6.0717 9.40325   2 
   6   0  -3 -12.288 7.96958   1 
  -4   0   3 157.185 17.2314   2 
   4   0  -3 150.162 14.1850   1 
  -4   0   3 152.610 10.4258   3 
  -2   0   3 5894.77 235.887   2 
   2   0  -3 6197.74 235.300   1 
   0   0   3 3187.80 125.994   2 
   0   0  -3 3239.03 127.596   3 
   0   0   3 3347.05 127.101   2 
   0   0  -3 3171.20 127.682   1 
  -2   0  -3 7517.24 303.716   3 
  -2   0  -3 8153.03 306.244   1 
  -2   0  -3 7906.94 312.513   2 
  -4   0  -3 1911.53 78.2737   3 
  -4   0  -3 1922.44 83.5345   1 
  -4   0  -3 1882.63 84.9462   2 
   6   0   3 139.205 19.9257   1 
  -6   0  -3 173.204 23.7404   2 
   6   0   3 140.729 13.0562   3 
  -8   0  -3 240.821 28.7520   2 
   8   0   3 214.911 15.3000   3 
   8   0   3 256.778 26.5500   1 
  10   0   3 165.758 28.4258   1 
 -10   0  -3 178.604 33.3326   2 
 -12   0  -3 89.6289 28.8856   2 
  12   0   3 68.8120 23.4804   1 
 -13  -1   3 132.024 33.4745   2 
  13  -1  -3 148.193 33.3763   1 
  13   1  -3 165.991 32.9958   1 
 -13   1   3 146.691 33.3453   2 
  11  -1  -3 234.386 33.7527   1 
 -11  -1   3 351.189 38.1775   2 
 -11   1   3 318.001 36.7937   2 
  11   1  -3 338.923 35.3447   1 
   9  -1  -3 98.0774 21.0665   1 
  -9  -1   3 46.6055 18.9338   2 
   9   1  -3 74.6510 18.5834   1 
  -9   1   3 68.2887 22.1121   2 
   7  -1  -3 1428.61 70.5236   1 
  -7  -1   3 1425.17 73.7703   2 
  -7   1   3 1443.73 73.1749   2 
   7   1  -3 1395.90 69.8192   1 
   5  -1  -3 149.976 16.8087   1 
  -5  -1   3 126.973 12.0308   3 
  -5  -1   3 153.500 19.4747   2 
   5   1  -3 129.052 15.0925   1 
   5   1  -3 143.195 9.37764   3 
  -5   1   3 123.188 9.97403   3 
  -5   1   3 166.148 20.9136   2 
   3  -1  -3 12.4011 8.53835   1 
  -3  -1   3 -11.780 9.67773   2 
  -3   1   3 3.45807 8.02802   2 
   3   1  -3 1.17117 5.90643   1 
  -3   1   3 1.10668 5.21522   3 
   3   1  -3 5.78106 4.15350   3 
   1  -1  -3 1010.20 43.7419   1 
  -1  -1   3 976.710 45.1418   2 
   1   1  -3 957.435 41.1605   3 
  -1   1   3 911.141 39.1182   2 
   1   1  -3 966.810 40.8099   1 
  -1  -1  -3 4.50838 5.00955   2 
  -1  -1  -3 -7.1202 6.52348   1 
  -1   1  -3 4.09370 5.62664   1 
  -1   1  -3 3.52590 5.20350   3 
   1   1   3 5.41049 7.21515   3 
  -1   1  -3 12.6749 7.13161   2 
   1   1   3 -3.6217 5.64930   2 
  -3  -1  -3 65.5536 11.3632   1 
  -3  -1  -3 70.1078 12.4707   2 
  -3   1  -3 74.6333 9.01800   3 
   3   1   3 61.1795 9.44269   3 
  -3   1  -3 64.1957 10.5321   1 
  -3   1  -3 58.0200 12.0390   2 
   5  -1   3 955.596 49.6705   1 
  -5  -1  -3 971.989 51.6548   2 
  -5  -1  -3 1007.46 50.5201   1 
  -5   1  -3 991.232 43.7596   3 
   5   1   3 978.292 43.6388   3 
  -5   1  -3 932.765 51.9438   2 
  -7  -1  -3 6.45774 12.2744   2 
   7  -1   3 22.7215 11.4020   1 
   7   1   3 4.89161 10.2275   1 
   7   1   3 12.1727 6.52938   3 
  -7   1  -3 22.2810 13.7508   2 
  -7   1  -3 7.40796 6.57128   3 
  -9  -1  -3 322.728 34.9713   2 
   9  -1   3 335.200 32.3237   1 
   9   1   3 361.180 33.4081   1 
  -9   1  -3 336.147 35.8987   2 
  11  -1   3 208.877 32.6415   1 
 -11  -1  -3 238.889 38.9178   2 
  11   1   3 232.835 35.5543   1 
 -11   1  -3 238.124 38.5476   2 
  13  -1   3 -29.817 15.8042   1 
 -13   1  -3 21.9749 22.9588   2 
  13   1   3 -25.002 13.6962   1 
  14  -2  -3 -5.2268 23.5067   1 
 -14  -2   3 0.36414 23.3002   2 
  14   2  -3 12.1801 21.1600   1 
 -14   2   3 16.7648 23.4034   2 
  12  -2  -3 33.1306 22.3167   1 
 -12  -2   3 60.1495 24.3083   2 
  12   2  -3 60.2421 23.9255   1 
 -12   2   3 15.6636 21.3895   2 
  10  -2  -3 11.7259 16.6108   1 
 -10  -2   3 32.2063 17.9741   2 
  10   2  -3 6.34073 13.8125   1 
 -10   2   3 10.7673 17.8515   2 
   8  -2  -3 484.850 36.9456   1 
  -8  -2   3 520.038 40.6450   2 
   8   2  -3 540.606 36.6294   1 
  -8   2   3 496.853 39.5454   2 
  -6  -2   3 401.678 32.2259   2 
   6  -2  -3 364.974 28.0462   1 
  -6   2   3 366.435 28.9201   2 
   6   2  -3 381.334 27.1606   1 
  -6   2   3 371.312 20.4794   3 
   6   2  -3 397.053 18.3883   3 
   4  -2  -3 62.2534 12.8184   1 
  -4  -2   3 45.9534 14.1457   2 
  -4   2   3 51.2241 8.46712   3 
  -4   2   3 41.4904 11.1583   2 
   4   2  -3 44.3339 9.35663   1 
  -2  -2   3 609.275 36.8516   2 
   2  -2  -3 612.984 32.7861   1 
   2   2  -3 654.840 28.9113   3 
  -2   2   3 545.219 29.0960   3 
  -2   2   3 647.173 29.0008   2 
   2   2  -3 573.946 27.9276   1 
   0  -2  -3 953.502 43.3164   1 
   0  -2   3 980.920 46.7412   2 
   0   2   3 891.645 41.7564   3 
   0   2  -3 910.491 37.4690   1 
   0   2  -3 889.971 40.8376   3 
  -2  -2  -3 35.2754 9.35302   1 
  -2  -2  -3 29.3333 8.13855   2 
   2   2   3 28.8036 7.86703   3 
  -2   2  -3 31.0833 9.97311   2 
  -2   2  -3 29.3231 7.10541   3 
  -4  -2  -3 137.575 18.1609   2 
   4  -2   3 116.168 13.5308   1 
  -4  -2  -3 118.153 16.8511   1 
  -4   2  -3 103.746 11.2753   3 
  -4   2  -3 132.653 18.8905   2 
   4   2   3 108.933 12.1346   3 
  -6  -2  -3 9.87019 10.1212   1 
  -6  -2  -3 25.4873 14.0037   2 
   6  -2   3 20.8582 10.5824   1 
  -6   2  -3 10.1079 12.6375   2 
   6   2   3 22.2333 6.94280   3 
  -6   2  -3 17.3630 7.15192   3 
  -8  -2  -3 184.271 30.5418   2 
   8  -2   3 203.302 27.5099   1 
   8   2   3 206.266 28.7801   1 
  -8   2  -3 234.814 32.7832   2 
   8   2   3 188.384 14.1769   3 
  -8   2  -3 161.672 15.4818   3 
 -10  -2  -3 303.786 40.3860   2 
  10  -2   3 255.940 30.4430   1 
 -10   2  -3 288.110 40.1500   2 
  10   2   3 236.361 29.1012   1 
  12  -2   3 10.9934 17.4467   1 
 -12  -2  -3 32.0141 25.7919   2 
  12   2   3 -17.073 12.2865   1 
 -12   2  -3 19.9649 24.1810   2 
  13  -3  -3 -22.157 20.1193   1 
 -13  -3   3 31.3438 26.7810   2 
  13   3  -3 31.1223 22.6366   1 
 -13   3   3 -13.610 23.0796   2 
  11  -3  -3 126.605 26.5878   1 
 -11  -3   3 108.691 28.2889   2 
  11   3  -3 118.337 24.9174   1 
 -11   3   3 106.562 27.7011   2 
   9  -3  -3 42.3369 18.9163   1 
  -9  -3   3 18.8882 18.8312   2 
  -9   3   3 36.3670 18.6257   2 
   9   3  -3 69.7982 18.1369   1 
  -7  -3   3 663.497 45.9660   2 
   7  -3  -3 652.887 42.9296   1 
   7   3  -3 696.685 30.8153   3 
   7   3  -3 762.104 42.3162   1 
  -7   3   3 704.264 44.9130   2 
  -7   3   3 670.318 33.9019   3 
  -5  -3   3 1.82231 13.5037   2 
   5  -3  -3 32.0153 13.0958   1 
   5   3  -3 17.1621 9.14217   1 
   5   3  -3 24.5711 6.08638   3 
  -5   3   3 27.4251 12.1839   2 
  -5   3   3 16.4341 8.08583   3 
   3  -3  -3 157.078 18.5836   1 
  -3  -3   3 210.757 24.3341   2 
  -3   3   3 145.656 14.6683   2 
  -3   3   3 146.431 14.2697   3 
   3   3  -3 172.225 12.8618   3 
   3   3  -3 178.469 13.5410   1 
   1  -3  -3 3992.75 159.346   1 
   1  -3  -3 3987.74 155.840   2 
  -1  -3   3 4089.94 153.115   1 
  -1  -3   3 4166.41 165.206   2 
   1   3  -3 3733.66 157.368   3 
  -1   3   3 3867.39 158.064   3 
   1   3  -3 3890.30 152.679   1 
   1  -3   3 22.9055 4.46091   1 
  -1  -3  -3 23.4038 8.16195   2 
   1  -3   3 21.9126 14.0062   2 
  -1  -3  -3 15.7803 9.25176   1 
  -1   3  -3 24.9186 7.65825   3 
   1   3   3 19.9749 7.64882   3 
  -3  -3  -3 9.11402 8.88943   1 
   3  -3   3 17.6825 7.09608   1 
  -3  -3  -3 13.6761 9.54796   2 
  -3   3  -3 18.3703 10.7640   2 
   3   3   3 13.7749 7.46144   3 
  -3   3  -3 17.4409 7.64676   3 
   5  -3   3 1222.11 59.1829   1 
  -5  -3  -3 1278.24 62.3617   1 
  -5  -3  -3 1254.40 63.0174   2 
   5   3   3 1276.74 55.5540   3 
  -5   3  -3 1211.24 64.6973   2 
  -5   3  -3 1195.02 55.3191   3 
   7  -3   3 2.62240 10.1276   1 
  -7  -3  -3 11.9737 14.7479   2 
  -7   3  -3 -2.6776 13.1517   2 
   7   3   3 3.89465 10.6050   1 
   7   3   3 6.80044 7.56749   3 
  -7   3  -3 -2.2790 8.13909   3 
  -9  -3  -3 33.5999 18.9860   2 
   9  -3   3 30.6844 15.8794   1 
  -9   3  -3 6.00776 18.3334   2 
   9   3   3 32.6521 15.6433   1 
 -11  -3  -3 -15.442 19.3539   2 
  11  -3   3 22.3370 18.0711   1 
 -11   3  -3 -8.4868 19.8159   2 
  11   3   3 11.0053 16.7833   1 
 -13  -3  -3 20.0037 26.0636   2 
  13  -3   3 -0.0654 20.7368   1 
  13   3   3 7.37715 16.8222   1 
 -13   3  -3 -19.546 22.1022   2 
  14  -4  -3 -27.195 26.1437   1 
 -14  -4   3 -4.7673 19.2689   2 
 -14   4   3 22.1699 28.6947   2 
  14   4  -3 49.1819 25.8085   1 
 -12  -4   3 113.389 31.6933   2 
  12  -4  -3 108.822 31.5133   1 
  12   4  -3 143.649 29.8535   1 
 -12   4   3 153.770 35.5525   2 
  10  -4  -3 33.0911 21.9041   1 
 -10  -4   3 54.9679 23.0103   2 
  10   4  -3 70.3941 19.5638   1 
 -10   4   3 32.5068 20.0581   2 
   8  -4  -3 313.567 32.4344   1 
  -8  -4   3 327.597 35.3174   2 
   8   4  -3 311.103 18.1417   3 
  -8   4   3 347.439 34.0943   2 
  -8   4   3 331.913 22.9310   3 
   8   4  -3 317.566 28.7160   1 
   6  -4  -3 331.190 28.4644   1 
  -6  -4   3 217.912 29.0546   2 
  -6   4   3 339.904 28.0015   2 
   6   4  -3 267.670 17.7439   3 
  -6   4   3 318.826 21.6920   3 
   6   4  -3 268.583 23.0591   1 
  -4  -4   3 70.6650 21.0370   2 
   4  -4  -3 106.941 18.9049   1 
   4   4  -3 62.0429 9.89727   3 
  -4   4   3 87.3233 15.8783   2 
   4   4  -3 78.5793 12.5680   1 
  -4   4   3 53.2119 11.0463   3 
   2  -4  -3 1001.68 50.0590   1 
  -2  -4   3 1002.62 56.0720   2 
  -2   4   3 948.470 47.5659   3 
   2   4  -3 1018.10 43.2349   1 
  -2   4   3 988.201 46.3093   2 
   2   4  -3 1094.43 47.5186   3 
   0  -4  -3 207.588 17.5626   2 
   0  -4   3 229.538 27.8855   2 
   0  -4  -3 180.990 17.6256   1 
   0   4  -3 159.324 14.9240   3 
   0   4   3 185.968 16.8518   3 
  -2  -4  -3 338.284 24.1013   1 
   2  -4   3 321.556 17.7166   1 
   2  -4   3 356.368 32.1046   2 
  -2  -4  -3 329.515 22.7943   2 
   2   4   3 355.355 22.8257   3 
  -2   4  -3 336.078 22.1022   3 
  -4  -4  -3 106.019 17.0896   1 
  -4  -4  -3 84.3634 16.8293   2 
   4  -4   3 103.483 14.0906   1 
  -4   4  -3 107.011 14.1912   3 
   4   4   3 103.269 14.3929   3 
  -4   4  -3 126.575 21.1687   2 
  -6  -4  -3 8.24131 12.2814   2 
  -6  -4  -3 10.7880 11.7462   1 
   6  -4   3 -12.258 7.74709   1 
  -6   4  -3 15.5036 8.83598   3 
  -6   4  -3 10.9968 14.0925   2 
   6   4   3 1.97179 7.14233   3 
   8  -4   3 56.7312 16.9645   1 
  -8  -4  -3 52.6957 20.3953   2 
   8   4   3 73.7704 17.5592   1 
  -8   4  -3 82.8798 14.4605   3 
   8   4   3 79.5530 12.0317   3 
  -8   4  -3 53.7739 22.6296   2 
  10  -4   3 69.6855 23.7090   1 
 -10  -4  -3 142.212 32.0238   2 
 -10   4  -3 74.2988 26.1660   2 
  10   4   3 129.919 27.7804   1 
  12  -4   3 32.1668 22.9235   1 
 -12  -4  -3 24.6421 26.0423   2 
 -12   4  -3 45.4047 28.8447   2 
  12   4   3 35.4500 20.3544   1 
  13  -5  -3 5.28892 28.1500   1 
 -13  -5   3 101.314 31.1023   2 
  13   5  -3 72.6228 28.2853   1 
 -13   5   3 44.1591 30.8557   2 
 -11  -5   3 111.390 29.4639   2 
  11  -5  -3 88.9357 29.1676   1 
 -11   5   3 129.533 32.0069   2 
  11   5  -3 113.175 25.2393   1 
   9  -5  -3 118.968 27.1962   1 
  -9  -5   3 107.740 27.7318   2 
  -9   5   3 103.156 26.4012   2 
   9   5  -3 135.711 23.8787   1 
  -9   5   3 104.500 16.9555   3 
  -7  -5   3 594.207 47.9985   2 
   7  -5  -3 604.764 44.7131   1 
   7   5  -3 647.515 40.6135   1 
  -7   5   3 734.950 47.8260   2 
  -7   5   3 727.285 39.2233   3 
   7   5  -3 661.425 33.9804   3 
  -5  -5   3 219.116 31.7903   2 
   5  -5  -3 293.660 28.8968   1 
  -5   5   3 200.564 20.8307   3 
   5   5  -3 255.337 20.2361   1 
  -5   5   3 275.752 25.6883   2 
   5   5  -3 237.623 18.4128   3 
  -3  -5   3 33.2210 21.7356   2 
   3  -5  -3 13.7063 14.5962   1 
   3   5  -3 21.0632 6.63678   1 
   3   5  -3 21.9980 8.54242   3 
  -3   5   3 10.6073 11.3256   2 
  -3   5   3 8.53422 10.3549   3 
   1  -5  -3 374.748 26.9911   2 
   1  -5  -3 392.461 26.6599   1 
  -1  -5   3 353.831 37.1305   2 
  -1   5   3 356.995 25.8897   3 
   1   5  -3 332.823 23.9857   3 
   1  -5   3 119.495 25.1216   2 
  -1  -5  -3 162.069 20.2127   2 
  -1  -5  -3 147.313 19.0483   1 
   1   5   3 151.358 18.1359   3 
  -1   5  -3 140.707 17.6794   3 
   3  -5   3 422.602 23.0769   1 
  -3  -5  -3 420.051 29.3654   1 
  -3  -5  -3 397.916 28.7860   2 
   3   5   3 380.917 27.2166   3 
  -3   5  -3 357.148 26.2755   3 
   5  -5   3 642.296 36.5427   1 
  -5  -5  -3 621.876 40.9690   2 
  -5  -5  -3 624.788 39.8697   1 
  -5   5  -3 557.059 42.9330   2 
  -5   5  -3 631.579 36.3524   3 
   5   5   3 669.350 36.1064   3 
  -7  -5  -3 -11.746 13.5405   2 
  -7  -5  -3 -5.7141 12.4920   1 
   7  -5   3 -10.392 11.9262   1 
   7   5   3 1.77451 9.12674   3 
  -7   5  -3 1.48514 10.0856   3 
  -7   5  -3 -23.140 15.5848   2 
  -9  -5  -3 346.243 36.7962   2 
   9  -5   3 360.662 35.0872   1 
  -9   5  -3 319.160 40.2084   2 
   9   5   3 349.496 34.9244   1 
 -11  -5  -3 187.851 37.1817   2 
  11  -5   3 89.8574 25.6659   1 
 -11   5  -3 82.9164 29.2868   2 
  11   5   3 212.229 36.0761   1 
 -12  -6   3 39.3609 23.3608   2 
  12  -6  -3 47.4793 30.2980   1 
  12   6  -3 57.5296 21.8163   1 
 -12   6   3 64.3743 33.2433   2 
 -10  -6   3 17.9112 22.0069   2 
  10  -6  -3 -20.492 22.5920   1 
  10   6  -3 16.7484 17.5038   1 
 -10   6   3 5.05552 21.9872   2 
   8  -6  -3 25.4837 23.9582   1 
  -8  -6   3 -41.582 19.0205   2 
   8   6  -3 2.68707 8.40689   3 
   8   6  -3 31.9420 15.0103   1 
  -8   6   3 12.3555 20.3316   2 
  -8   6   3 30.9169 16.4852   3 
  -6  -6   3 -18.301 19.7619   2 
   6  -6  -3 6.93477 21.4182   1 
   6   6  -3 13.7706 11.0893   1 
   6   6  -3 -19.505 7.66191   3 
  -6   6   3 24.4233 18.5407   2 
  -6   6   3 -11.937 14.1069   3 
  -4  -6   3 -0.3028 22.2027   2 
   4  -6  -3 13.5185 17.9364   1 
  -4   6   3 -0.2015 11.2690   3 
   4   6  -3 0.80917 6.60506   1 
  -4   6   3 15.7204 15.1497   2 
   4   6  -3 -2.9086 7.75126   3 
   2  -6  -3 935.397 50.1430   1 
   2  -6  -3 990.643 52.3824   2 
  -2  -6   3 850.483 60.1018   2 
   2   6  -3 869.467 41.2223   1 
  -2   6   3 1074.14 50.9932   3 
   2   6  -3 912.835 48.1961   3 
   0  -6  -3 56.1713 15.2892   1 
   0  -6  -3 40.8280 17.4120   2 
   0  -6   3 56.7943 25.6020   2 
   0   6   3 41.1905 13.4361   3 
   0   6  -3 34.0434 11.3532   3 
  -2  -6  -3 443.819 31.0145   2 
   2  -6   3 380.439 38.6903   2 
  -2  -6  -3 429.364 29.8867   1 
   2   6   3 466.950 30.4276   3 
  -2   6  -3 417.148 29.8095   3 
  -4  -6  -3 267.040 27.5168   2 
  -4  -6  -3 264.805 25.6633   1 
   4  -6   3 271.161 22.0879   1 
  -4   6  -3 255.339 24.7606   3 
   4   6   3 268.041 23.8818   3 
  -4   6  -3 235.198 32.4843   2 
   6  -6   3 40.3098 15.3014   1 
  -6  -6  -3 38.7254 16.8341   1 
  -6  -6  -3 38.6580 18.2415   2 
   6   6   3 41.8167 12.8614   3 
  -6   6  -3 28.8908 20.8111   2 
  -6   6  -3 18.6905 13.6482   3 
  -8  -6  -3 230.671 34.2589   2 
   8  -6   3 148.212 25.6163   1 
   8   6   3 173.742 28.4176   1 
   8   6   3 177.100 19.3995   3 
  -8   6  -3 204.131 35.8963   2 
  -8   6  -3 142.349 20.0564   3 
 -10  -6  -3 222.919 38.0772   2 
  10  -6   3 175.917 30.6856   1 
 -10   6  -3 112.742 34.3793   2 
  10   6   3 169.194 32.9587   1 
 -12  -6  -3 30.7273 27.6658   2 
  12  -6   3 6.11299 24.4170   1 
  12   6   3 -4.3580 19.9636   1 
 -12   6  -3 -54.155 18.8732   2 
 -11  -7   3 66.5150 27.5392   2 
  11  -7  -3 33.9719 30.8430   1 
 -11   7   3 80.4063 31.5204   2 
  11   7  -3 122.699 27.8034   1 
   9  -7  -3 -3.0312 26.2530   1 
  -9  -7   3 5.23182 21.5907   2 
   9   7  -3 -24.360 10.6980   1 
  -9   7   3 -1.7150 13.7280   3 
  -9   7   3 11.7299 22.3673   2 
  -7  -7   3 196.185 36.4124   2 
   7  -7  -3 253.355 38.0407   1 
  -7   7   3 281.405 28.1015   3 
   7   7  -3 246.069 22.8617   3 
  -7   7   3 275.901 37.7124   2 
   7   7  -3 275.361 26.6364   1 
   5  -7  -3 77.6128 26.5142   1 
  -5  -7   3 37.4614 25.9973   2 
   5   7  -3 56.8936 14.1751   1 
  -5   7   3 24.5064 20.1037   2 
   5   7  -3 28.2098 12.3156   3 
  -5   7   3 26.3083 17.4467   3 
   3  -7  -3 1.03788 17.1557   1 
  -3  -7   3 6.28070 26.7896   2 
   3  -7  -3 29.3309 19.1870   2 
   3   7  -3 -1.1237 5.09289   1 
   3   7  -3 -2.3069 9.33104   3 
  -3   7   3 11.7301 12.7062   3 
  -1  -7   3 591.135 52.8406   2 
   1  -7  -3 576.112 43.9035   2 
   1  -7  -3 606.837 38.8156   1 
  -1   7   3 646.700 39.3736   3 
   1   7  -3 675.049 39.7692   3 
  -1  -7  -3 -9.9752 12.1309   1 
  -1  -7  -3 -13.889 16.2749   2 
   1  -7   3 56.1879 27.0843   2 
   1   7   3 4.43907 12.1663   3 
  -1   7  -3 -1.7276 9.02569   3 
  -3  -7  -3 8.20465 12.8641   1 
   3  -7   3 7.98156 12.7461   1 
   3  -7   3 -35.064 21.9893   2 
  -3  -7  -3 22.8953 18.7420   2 
   3   7   3 6.81154 11.6224   3 
  -3   7  -3 11.8746 12.9309   3 
  -5  -7  -3 253.613 27.3490   1 
   5  -7   3 250.289 27.5544   1 
  -5  -7  -3 260.312 30.9692   2 
   5   7   3 271.322 25.7632   3 
  -5   7  -3 223.254 26.7708   3 
   7  -7   3 -3.2714 16.5114   1 
  -7  -7  -3 9.24061 15.0639   1 
  -7  -7  -3 -7.5586 14.4295   2 
  -7   7  -3 -9.2706 12.3748   3 
  -7   7  -3 29.3525 23.7033   2 
   7   7   3 12.2136 11.8089   3 
  -9  -7  -3 23.0166 20.5944   2 
   9  -7   3 -3.5049 19.5759   1 
   9   7   3 19.0404 15.6760   1 
  -9   7  -3 4.05597 26.2275   2 
  -9   7  -3 -11.977 11.4846   3 
 -11  -7  -3 50.9347 27.1666   2 
  11  -7   3 44.2817 26.4083   1 
  11   7   3 38.2221 22.3495   1 
 -11   7  -3 26.3807 32.2069   2 
 -12  -8   3 31.6997 24.3282   2 
  12  -8  -3 -52.316 31.6130   1 
 -12   8   3 -16.675 32.2717   2 
  12   8  -3 -31.055 17.2020   1 
  10  -8  -3 -43.195 30.1916   1 
 -10  -8   3 3.01121 24.9305   2 
 -10   8   3 -0.2253 27.3894   2 
  10   8  -3 7.57784 16.8809   1 
   8  -8  -3 23.5867 29.7491   1 
  -8  -8   3 9.66442 23.4158   2 
  -8   8   3 51.5427 28.5128   2 
  -8   8   3 53.8328 18.7286   3 
   8   8  -3 58.4184 13.8369   3 
   8   8  -3 70.3019 19.7932   1 
   6  -8  -3 78.5255 30.9759   1 
  -6  -8   3 99.3500 33.0289   2 
   6   8  -3 98.1911 17.9619   1 
   6   8  -3 62.0898 15.5230   3 
  -6   8   3 66.0284 26.8394   2 
  -6   8   3 65.2517 19.3339   3 
   4  -8  -3 15.7136 22.5430   1 
  -4  -8   3 -1.8722 28.5364   2 
   4  -8  -3 21.5263 25.1118   2 
   4   8  -3 6.58611 12.3099   3 
   4   8  -3 39.1526 10.8526   1 
  -4   8   3 6.00906 15.2639   3 
   2  -8  -3 307.472 29.4506   1 
   2  -8  -3 353.799 39.1085   2 
  -2  -8   3 326.697 47.5531   2 
   2   8  -3 295.089 28.1456   3 
  -2   8   3 231.654 27.5148   3 
   2   8  -3 312.446 18.5211   1 
   0  -8  -3 70.6633 17.3009   1 
   0  -8   3 41.0631 31.3325   2 
   0  -8  -3 29.2052 25.0892   2 
   0   8  -3 21.5892 14.4692   3 
   0   8   3 5.31370 13.8423   3 
  -2  -8  -3 202.898 24.6096   1 
  -2  -8  -3 193.657 30.9144   2 
   2  -8   3 154.703 38.1325   2 
  -2   8  -3 156.397 24.5589   3 
   2   8   3 190.194 25.8455   3 
   4  -8   3 152.320 23.4665   1 
  -4  -8  -3 166.139 29.6056   2 
   4  -8   3 169.901 41.2495   2 
  -4  -8  -3 189.453 28.0299   1 
  -4   8  -3 182.928 26.9122   3 
   4   8   3 172.121 24.6883   3 
   6  -8   3 -26.607 20.2376   1 
  -6  -8  -3 16.1305 19.9955   2 
  -6  -8  -3 10.3119 14.7719   1 
   6  -8   3 -1.2220 29.7401   2 
   6   8   3 7.91075 13.5656   3 
  -6   8  -3 17.2233 15.4403   3 
  -8  -8  -3 33.0755 20.4720   2 
   8  -8   3 -43.392 20.4776   1 
   8   8   3 -0.1791 14.9638   1 
  -8   8  -3 19.9281 15.6633   3 
   8   8   3 14.6844 13.9712   3 
  -8   8  -3 34.3577 27.9300   2 
 -10  -8  -3 2.59668 22.0378   2 
 -10   8  -3 9.50011 30.0435   2 
  10   8   3 30.3655 20.0389   1 
 -11  -9   3 54.1526 27.0377   2 
  11  -9  -3 -18.567 37.5079   1 
 -11   9   3 -32.250 32.0558   2 
  11   9  -3 2.44150 18.7528   1 
  -9  -9   3 10.8839 24.2560   2 
   9  -9  -3 -7.6340 32.9825   1 
  -9   9   3 21.4638 18.8915   3 
   9   9  -3 36.3850 20.4734   1 
  -9   9   3 0.79145 28.8364   2 
  -7  -9   3 122.018 32.6242   2 
   7  -9  -3 158.153 38.8026   1 
   7   9  -3 138.125 22.3112   3 
   7   9  -3 193.465 25.9783   1 
  -7   9   3 191.660 29.2790   3 
  -7   9   3 127.215 34.5892   2 
   5  -9  -3 93.3153 27.7562   1 
  -5  -9   3 99.8386 33.0370   2 
   5  -9  -3 97.2536 32.0037   2 
   5   9  -3 148.119 20.4775   1 
   5   9  -3 88.0098 19.7538   3 
  -5   9   3 87.4480 23.4709   3 
   3  -9  -3 21.5333 26.2463   2 
  -3  -9   3 1.30797 32.7538   2 
   3  -9  -3 40.2731 21.5243   1 
   3   9  -3 26.0907 8.58274   1 
   3   9  -3 20.2062 15.6251   3 
  -3   9   3 11.8014 17.0999   3 
  -1  -9   3 28.1298 35.8240   2 
   1  -9  -3 83.1313 21.0824   1 
   1  -9  -3 71.3156 30.8261   2 
  -1   9   3 93.4690 21.9641   3 
   1   9  -3 75.5434 19.6024   3 
  -1  -9  -3 -16.569 23.5299   2 
  -1  -9  -3 -14.554 14.1026   1 
   1  -9   3 17.5856 34.4536   2 
   1   9   3 5.50046 15.6961   3 
  -1   9  -3 -8.1700 14.9362   3 
  -3  -9  -3 1.67719 15.0730   1 
  -3  -9  -3 59.6456 24.4475   2 
   3  -9   3 22.1623 33.3637   2 
   3   9   3 25.6567 17.8018   3 
  -3   9  -3 24.5602 18.7661   3 
  -5  -9  -3 83.3971 24.7633   2 
  -5  -9  -3 72.4523 21.1013   1 
   5  -9   3 -13.061 28.8160   2 
   5   9   3 64.6908 19.9003   3 
  -5   9  -3 78.1450 22.6846   3 
   7  -9   3 53.7264 34.6674   2 
  -7  -9  -3 0.27434 15.3095   1 
  -7  -9  -3 -11.784 18.8100   2 
  -7   9  -3 10.8542 16.2031   3 
   7   9   3 7.50103 13.5650   3 
  -9  -9  -3 32.5052 22.4480   2 
   9   9   3 45.2825 22.2315   1 
  -9   9  -3 24.8862 17.6828   3 
  -9   9  -3 32.5485 32.1681   2 
 -10 -10   3 27.5211 28.2630   2 
  10 -10  -3 -3.5642 37.2299   1 
  10  10  -3 -0.4253 19.6067   1 
 -10  10   3 -14.326 33.6334   2 
  -8 -10   3 51.6051 30.2734   2 
   8 -10  -3 12.3242 32.1911   1 
   8 -10  -3 164.713 38.7970   2 
   8  10  -3 15.8084 15.9606   1 
  -8  10   3 46.1389 24.4492   3 
   8  10  -3 27.9609 15.7373   3 
  -6 -10   3 61.4924 30.1758   2 
   6 -10  -3 33.5832 28.4412   2 
   6 -10  -3 72.9701 28.8693   1 
   6  10  -3 -1.3722 16.2445   3 
  -6  10   3 33.4848 21.8176   3 
   4 -10  -3 -17.606 26.1421   2 
   4 -10  -3 29.9026 20.2433   1 
  -4 -10   3 -12.062 30.1025   2 
  -4  10   3 27.9876 19.9366   3 
   4  10  -3 3.22794 14.3412   3 
  -2 -10   3 94.5771 40.2607   2 
   2 -10  -3 102.310 22.8448   1 
   2 -10  -3 62.8370 32.0778   2 
  -2  10   3 64.4828 20.9827   3 
   2  10  -3 86.3887 21.8851   3 
   0 -10  -3 45.0091 18.3648   1 
   0 -10   3 -4.7107 35.5383   2 
   0 -10  -3 21.9607 30.0738   2 
   0  10  -3 15.5472 17.3585   3 
   0  10   3 27.1219 19.8471   3 
   2 -10   3 25.3429 36.2519   2 
  -2 -10  -3 -0.5223 15.2702   1 
  -2 -10  -3 8.19346 22.4974   2 
  -2  10  -3 8.01963 18.1536   3 
   2  10   3 17.7634 18.0929   3 
   4 -10   3 40.3040 36.0692   2 
  -4 -10  -3 35.4478 22.9886   2 
  -4 -10  -3 12.6708 16.9531   1 
   4  10   3 -3.8619 16.1482   3 
  -4  10  -3 20.6083 20.4326   3 
  -6 -10  -3 12.9363 17.8902   1 
  -6 -10  -3 47.1448 23.0835   2 
   6 -10   3 34.5175 35.7636   2 
  -6  10  -3 22.0325 18.5385   3 
   6  10   3 5.81971 14.8322   3 
   8 -10   3 67.7466 40.9537   2 
  -8 -10  -3 81.8621 27.1732   2 
   8  10   3 45.8344 23.6665   1 
   8  10   3 33.6232 18.4082   3 
  -8  10  -3 16.4217 19.5706   3 
   9 -11  -3 145.178 42.3429   2 
  -9 -11   3 66.3294 34.2182   2 
  -7 -11   3 78.2602 30.8906   2 
   7 -11  -3 70.3201 36.8873   2 
   7  11  -3 64.5391 20.8806   3 
  -7  11   3 91.5687 27.8166   3 
   5 -11  -3 45.5724 24.2258   1 
   5 -11  -3 -20.019 31.3248   2 
  -5 -11   3 11.1913 29.1843   2 
   5  11  -3 -14.034 16.3160   3 
  -5  11   3 21.5683 20.4247   3 
  -3 -11   3 38.0237 36.5557   2 
   3 -11  -3 3.20572 32.7168   2 
   3 -11  -3 28.7399 20.2658   1 
  -3  11   3 17.3197 19.4903   3 
   3  11  -3 0.23164 15.6822   3 
   1 -11  -3 124.269 37.2155   2 
  -1 -11   3 144.845 46.3001   2 
   1 -11  -3 176.559 26.8312   1 
   1  11  -3 198.986 30.0935   3 
  -1 -11  -3 0.77474 17.9466   1 
   1 -11   3 -41.524 35.3845   2 
  -1 -11  -3 21.6645 28.1338   2 
  -1  11  -3 9.12695 20.2971   3 
   1  11   3 31.8777 19.9264   3 
  -3 -11  -3 51.3759 24.8280   2 
  -3 -11  -3 54.2504 20.8251   1 
   3 -11   3 24.4321 41.3159   2 
   3  11   3 49.2656 21.0730   3 
  -3  11  -3 38.0305 23.2155   3 
  -5 -11  -3 111.780 28.7728   2 
  -5 -11  -3 81.8463 22.9894   1 
   5 -11   3 43.8288 41.7577   2 
  -5  11  -3 69.3581 26.5158   3 
   5  11   3 61.8586 23.2724   3 
   7 -11   3 27.7897 38.8263   2 
  -7 -11  -3 52.5275 22.8206   2 
   7  11   3 16.2180 16.3521   3 
  -7  11  -3 -6.8647 20.5019   3 
   8 -12  -3 20.0476 40.2137   2 
  -8 -12   3 83.2748 33.8659   2 
   8  12  -3 18.8763 18.5797   3 
  -8  12   3 44.7167 26.4913   3 
  -6 -12   3 43.1315 29.2725   2 
   6 -12  -3 7.84991 37.7384   2 
  -6  12   3 6.17727 20.9219   3 
   6  12  -3 -29.140 18.3070   3 
  -4 -12   3 43.6596 33.8814   2 
   4 -12  -3 -36.427 34.8792   2 
  -4  12   3 -11.623 22.3340   3 
   4  12  -3 -4.7438 17.0877   3 
  -2 -12   3 12.4181 38.1449   2 
   2 -12  -3 63.9129 40.3086   2 
  -2  12   3 63.4704 26.5837   3 
   2  12  -3 57.8351 23.8355   3 
   0 -12  -3 40.2148 33.2158   2 
   0 -12  -3 15.6876 20.0723   1 
   0 -12   3 -8.6412 40.3160   2 
   0  12   3 -6.2874 19.3875   3 
   0  12  -3 29.1714 23.4373   3 
   2 -12   3 -3.3957 41.0079   2 
  -2 -12  -3 41.1975 20.5180   1 
  -2 -12  -3 19.2295 24.3594   2 
  -2  12  -3 35.7909 25.0156   3 
   2  12   3 -5.2647 19.1334   3 
   4 -12   3 36.5134 43.0224   2 
  -4 -12  -3 41.1987 21.7193   1 
   4  12   3 25.5051 20.1133   3 
  -4  12  -3 156.526 33.4471   3 
  -6 -12  -3 12.1579 19.9784   1 
  -6 -12  -3 94.4934 28.3012   2 
   6 -12   3 -32.578 39.2743   2 
   6  12   3 29.1772 19.3458   3 
  -6  12  -3 62.0859 26.4422   3 
   5 -13  -3 -31.543 38.5700   2 
  -5 -13   3 65.1397 36.5392   2 
  -5  13   3 48.3456 24.6796   3 
   5  13  -3 -6.5134 19.5198   3 
   3 -13  -3 3.57891 38.6081   2 
  -3 -13   3 56.2692 38.3642   2 
   3  13  -3 15.1483 21.9905   3 
  -3  13   3 27.3226 22.6083   3 
  -1 -13   3 93.3940 48.2724   2 
   1 -13  -3 31.4451 38.5768   2 
   1  13  -3 38.6811 26.9347   3 
  -1  13   3 90.9429 27.6951   3 
  -1 -13  -3 25.0287 29.1325   2 
   1 -13   3 1.24113 43.9578   2 
   1  13   3 -18.248 19.6520   3 
  -1  13  -3 -28.595 20.4240   3 
  -3 -13  -3 152.068 50.9280   2 
   3 -13   3 -31.049 46.5971   2 
  -3  13  -3 32.3002 25.4275   3 
   3  13   3 6.61433 21.0235   3 
   5 -13   3 -80.324 46.1393   2 
  -5  13  -3 36.7723 26.9577   3 
   5  13   3 19.4105 25.0653   3 
  -4 -14   3 25.8380 36.5423   2 
  -4  14   3 -18.902 25.0812   3 
   4  14  -3 8.22256 20.8987   3 
  -2 -14   3 18.3123 42.8119   2 
  -2  14   3 46.6279 29.9115   3 
   2  14  -3 60.8675 28.1724   3 
   0 -14   3 -8.9298 47.8375   2 
   0  14  -3 13.6995 28.4436   3 
   0  14   3 0.06423 25.0434   3 
   2 -14   3 -59.693 47.6128   2 
   2  14   3 5.81319 24.5534   3 
  -2  14  -3 23.5057 26.9650   3 
 -14   0   4 40.9850 23.3396   2 
  14   0  -4 -14.581 20.4240   1 
 -12   0   4 230.980 38.8661   2 
  12   0  -4 162.600 32.2402   1 
 -10   0   4 -12.334 16.0696   2 
  10   0  -4 -14.488 12.4174   1 
   8   0  -4 19.4253 13.8915   1 
  -8   0   4 10.2111 14.9802   2 
  -6   0   4 12.7155 12.4322   2 
   6   0  -4 35.9023 11.7748   1 
  -6   0   4 22.5955 5.92477   3 
   4   0  -4 546.107 29.4508   1 
  -4   0   4 459.633 24.8466   3 
  -4   0   4 496.501 30.7001   2 
  -2   0   4 536.221 27.8498   2 
   2   0  -4 414.348 24.2949   3 
   2   0  -4 571.114 28.0175   1 
   0   0   4 1314.92 56.5509   2 
   0   0  -4 1373.00 58.4428   1 
   0   0   4 1417.24 57.8982   2 
   0   0  -4 1356.58 58.0268   3 
  -2   0  -4 1837.08 78.0618   1 
  -2   0  -4 1809.19 76.5370   3 
  -2   0  -4 1864.21 77.8672   2 
  -4   0  -4 2802.22 120.145   2 
  -4   0  -4 2751.07 114.232   3 
  -4   0  -4 2889.65 119.300   1 
   6   0   4 90.6169 17.1638   1 
   6   0   4 97.8066 13.2938   3 
  -6   0  -4 117.877 21.0577   2 
  -8   0  -4 1156.13 67.1683   2 
   8   0   4 1170.79 52.5264   3 
   8   0   4 1145.81 64.8627   1 
 -10   0  -4 218.594 35.4921   2 
  10   0   4 206.776 31.9975   1 
  12   0   4 -9.2694 14.7230   1 
 -12   0  -4 -30.481 16.2123   2 
  13  -1  -4 210.763 37.2032   1 
 -13  -1   4 268.104 41.6535   2 
  13   1  -4 240.473 38.4647   1 
 -13   1   4 285.182 44.2091   2 
  11  -1  -4 30.6771 19.0474   1 
 -11  -1   4 45.3882 22.1112   2 
 -11   1   4 70.1612 25.5136   2 
  11   1  -4 35.8463 19.7157   1 
  -9  -1   4 -11.235 15.6719   2 
   9  -1  -4 22.2653 16.2381   1 
  -9   1   4 0.15618 15.1570   2 
   9   1  -4 0.58010 13.9260   1 
   7  -1  -4 1004.93 54.7942   1 
  -7  -1   4 1017.75 58.6651   2 
   7   1  -4 1075.51 55.5646   1 
  -7   1   4 1048.82 57.8730   2 
  -7   1   4 1005.20 43.7406   3 
  -5  -1   4 254.096 24.7301   2 
   5  -1  -4 286.285 22.6662   1 
   5   1  -4 257.164 15.5060   3 
  -5   1   4 282.754 23.1251   2 
   5   1  -4 264.886 21.4119   1 
  -5   1   4 292.484 16.5528   3 
   3  -1  -4 683.617 34.6237   1 
  -3  -1   4 596.776 35.4738   2 
  -3   1   4 623.269 32.7299   2 
   3   1  -4 682.980 32.7209   1 
  -3   1   4 690.495 31.3910   3 
   3   1  -4 604.020 29.7017   3 
   1  -1  -4 3881.53 153.555   1 
  -1  -1   4 3837.59 154.470   2 
   1  -1  -4 3846.16 148.746   2 
   1   1  -4 3940.06 151.439   1 
   1   1  -4 3748.61 151.585   3 
  -1   1   4 3723.24 148.587   2 
  -1   1   4 3911.93 153.380   3 
  -1  -1  -4 847.888 40.3369   1 
  -1  -1  -4 873.273 36.1438   2 
  -1   1  -4 832.647 38.2044   3 
   1   1   4 851.268 40.0897   3 
  -1   1  -4 847.300 39.2605   2 
   1   1   4 809.995 38.0972   2 
  -1   1  -4 767.416 37.4036   1 
  -3  -1  -4 1189.61 55.1270   2 
  -3  -1  -4 1216.25 56.5120   1 
  -3   1  -4 1145.20 52.3881   3 
   3   1   4 1221.60 54.1123   3 
  -3   1  -4 1194.21 54.4903   1 
  -3   1  -4 1204.88 56.8917   2 
   5  -1   4 420.502 28.3628   1 
  -5  -1  -4 438.161 30.0580   1 
  -5  -1  -4 400.129 30.2738   2 
  -5   1  -4 421.906 24.2897   3 
   5   1   4 434.345 25.1824   3 
  -5   1  -4 420.997 30.7218   2 
   7  -1   4 153.828 23.1701   1 
  -7  -1  -4 195.063 28.4341   2 
  -7   1  -4 135.190 14.3035   3 
   7   1   4 127.515 14.0055   3 
   7   1   4 126.266 21.2607   1 
  -7   1  -4 132.528 24.5961   2 
  -9  -1  -4 832.953 56.0028   2 
   9  -1   4 762.487 52.6632   1 
   9   1   4 850.106 54.1457   1 
  -9   1  -4 798.513 56.1969   2 
  11  -1   4 36.6726 19.8219   1 
 -11  -1  -4 0.26420 21.6435   2 
  11   1   4 25.0288 18.4274   1 
 -11   1  -4 57.0374 25.5507   2 
 -13  -1  -4 -29.944 19.5545   2 
  13  -1   4 28.4280 23.1552   1 
 -13   1  -4 19.6157 24.6022   2 
  13   1   4 21.6830 20.3539   1 
  14  -2  -4 21.0066 25.9597   1 
 -14  -2   4 17.0078 25.4068   2 
 -14   2   4 -11.893 23.5580   2 
  14   2  -4 -13.245 19.8521   1 
 -12  -2   4 51.3884 24.1670   2 
  12  -2  -4 -4.1617 20.4906   1 
  12   2  -4 50.8457 23.3406   1 
 -12   2   4 49.2400 25.4277   2 
 -10  -2   4 52.0624 21.6216   2 
  10  -2  -4 43.7479 20.4959   1 
 -10   2   4 40.5997 19.2183   2 
  10   2  -4 51.4177 18.0583   1 
   8  -2  -4 487.015 36.7672   1 
  -8  -2   4 457.000 39.7840   2 
  -8   2   4 474.574 24.2325   3 
   8   2  -4 436.076 34.5908   1 
  -8   2   4 489.914 38.3732   2 
   6  -2  -4 436.030 31.2521   1 
  -6  -2   4 470.966 35.3196   2 
  -6   2   4 490.977 24.3365   3 
   6   2  -4 418.146 29.2881   1 
  -6   2   4 459.487 32.9385   2 
   6   2  -4 426.146 22.1557   3 
   4  -2  -4 374.839 25.4188   1 
  -4  -2   4 373.650 28.8070   2 
   4   2  -4 358.924 22.7367   1 
   4   2  -4 359.515 19.1970   3 
  -4   2   4 341.793 23.9121   2 
  -4   2   4 337.041 20.5611   3 
  -2  -2   4 557.853 34.7687   2 
   2  -2  -4 528.366 31.4982   1 
   2   2  -4 552.189 26.8876   3 
  -2   2   4 533.396 28.1766   3 
  -2   2   4 528.086 25.2998   2 
   2   2  -4 510.298 26.0687   1 
   0  -2  -4 459.483 26.4363   1 
   0  -2   4 424.795 22.8174   1 
   0  -2   4 503.903 30.9036   2 
   0   2  -4 394.257 23.3980   3 
   0   2   4 495.407 25.9418   3 
   0   2  -4 447.606 21.3687   1 
  -2  -2  -4 30.7303 7.87047   2 
  -2  -2  -4 23.6272 10.0290   1 
  -2   2  -4 15.7472 7.21121   3 
   2   2   4 26.2661 8.34307   3 
  -2   2  -4 21.9324 6.73813   1 
  -2   2  -4 34.2784 10.8402   2 
  -4  -2  -4 608.161 35.7943   1 
  -4  -2  -4 624.667 35.3064   2 
   4  -2   4 595.075 33.5585   1 
  -4   2  -4 586.890 37.0252   2 
   4   2   4 594.719 31.7433   3 
  -4   2  -4 610.374 31.3770   3 
  -6  -2  -4 8.60999 11.1741   1 
   6  -2   4 10.0373 9.91130   1 
  -6  -2  -4 26.3555 13.8242   2 
  -6   2  -4 14.6948 8.03283   3 
  -6   2  -4 8.93535 11.2439   2 
   6   2   4 12.3190 7.33373   3 
  -8  -2  -4 217.450 31.8317   2 
   8  -2   4 235.476 30.2317   1 
  -8   2  -4 226.554 33.1250   2 
  -8   2  -4 193.309 17.8228   3 
   8   2   4 194.612 16.7480   3 
   8   2   4 231.833 26.0740   1 
 -10  -2  -4 -4.7964 18.2206   2 
  10  -2   4 -12.727 13.6394   1 
  10   2   4 -14.186 12.1510   1 
 -10   2  -4 25.5297 21.2260   2 
  12  -2   4 -6.2030 16.7114   1 
 -12  -2  -4 -9.6435 21.8904   2 
 -12   2  -4 28.5521 26.4652   2 
  12   2   4 14.6593 18.0745   1 
 -13  -3   4 94.9105 29.7443   2 
  13  -3  -4 70.3668 29.1914   1 
 -13   3   4 111.156 31.5895   2 
  13   3  -4 81.1019 28.4110   1 
 -11  -3   4 -10.568 15.6893   2 
  11  -3  -4 -13.469 19.2005   1 
 -11   3   4 -3.2725 17.6562   2 
  11   3  -4 -9.3349 15.0249   1 
  -9  -3   4 14.3503 16.4017   2 
   9  -3  -4 24.8436 20.0291   1 
   9   3  -4 22.9739 13.7099   1 
  -9   3   4 -10.398 15.9500   2 
   7  -3  -4 847.190 50.0158   1 
  -7  -3   4 835.432 53.5965   2 
  -7   3   4 807.599 50.5673   2 
   7   3  -4 865.295 47.9145   1 
  -7   3   4 848.007 40.3205   3 
   7   3  -4 835.119 37.5008   3 
   5  -3  -4 336.129 26.8553   1 
  -5  -3   4 285.863 27.6374   2 
   5   3  -4 275.031 17.2236   3 
  -5   3   4 290.525 19.3750   3 
   5   3  -4 288.472 22.1366   1 
  -5   3   4 260.409 22.5595   2 
  -3  -3   4 985.206 53.2066   2 
   3  -3  -4 994.397 49.2305   1 
   3   3  -4 999.009 44.1880   1 
  -3   3   4 992.656 45.2335   2 
  -3   3   4 882.257 44.9518   3 
   3   3  -4 1003.10 44.3801   3 
   1  -3  -4 1889.96 73.7237   2 
   1  -3  -4 1889.20 74.4641   2 
  -1  -3   4 1777.63 85.6711   2 
   1  -3  -4 1916.13 80.9090   1 
   1   3  -4 1708.74 73.5341   1 
  -1   3   4 1941.26 79.7946   3 
   1   3  -4 1866.48 78.5027   3 
  -1  -3  -4 258.832 20.1162   1 
   1  -3   4 214.854 13.0353   1 
  -1  -3  -4 225.092 14.1103   2 
   1  -3   4 217.614 24.1308   2 
  -1   3  -4 196.971 15.8932   3 
  -1   3  -4 203.960 12.5246   1 
   1   3   4 251.987 17.9958   3 
  -3  -3  -4 946.466 47.7731   1 
  -3  -3  -4 961.720 45.3018   2 
   3  -3   4 854.111 42.7923   1 
   3   3   4 930.656 44.4798   3 
  -3   3  -4 938.383 49.5761   2 
  -3   3  -4 873.011 43.5923   3 
  -5  -3  -4 610.134 37.6641   2 
  -5  -3  -4 608.430 38.2210   1 
   5  -3   4 615.961 36.2351   1 
  -5   3  -4 638.786 33.1971   3 
  -5   3  -4 586.507 40.8481   2 
   5   3   4 654.364 33.5680   3 
   7  -3   4 37.1581 15.2044   1 
  -7  -3  -4 20.4727 12.9454   1 
  -7  -3  -4 55.6908 18.4669   2 
   7   3   4 39.3861 10.4815   3 
  -7   3  -4 18.6905 16.6535   2 
  -7   3  -4 11.4957 9.58528   3 
  -9  -3  -4 394.503 38.4821   2 
   9  -3   4 376.439 34.5658   1 
   9   3   4 369.954 34.8205   1 
  -9   3  -4 414.726 42.1804   2 
 -11  -3  -4 5.35824 22.2890   2 
  11  -3   4 41.0465 20.1087   1 
  11   3   4 36.8828 19.8103   1 
 -11   3  -4 -13.088 20.7058   2 
 -13  -3  -4 -23.009 21.7134   2 
  13  -3   4 10.3482 23.0115   1 
 -13   3  -4 21.4202 30.5035   2 
  13   3   4 -16.820 13.6896   1 
 -14  -4   4 63.8850 30.9383   2 
  14  -4  -4 -26.312 27.6570   1 
 -14   4   4 50.5668 31.0665   2 
  14   4  -4 24.4411 24.2056   1 
  12  -4  -4 160.604 35.0773   1 
 -12  -4   4 164.282 34.1151   2 
 -12   4   4 250.986 41.4397   2 
  12   4  -4 180.825 32.5930   1 
  10  -4  -4 9.38020 20.9229   1 
 -10  -4   4 16.9255 18.2948   2 
 -10   4   4 -3.3751 18.1046   2 
  10   4  -4 12.9730 14.5662   1 
  -8  -4   4 28.0219 20.9424   2 
   8  -4  -4 -1.8373 17.9003   1 
  -8   4   4 14.5538 9.91880   3 
   8   4  -4 13.4838 12.9978   1 
  -8   4   4 5.47354 15.6837   2 
   8   4  -4 20.0830 6.76649   3 
  -6  -4   4 -27.968 13.9731   2 
   6  -4  -4 32.1763 17.9620   1 
  -6   4   4 17.1503 13.1124   2 
   6   4  -4 -10.646 8.09486   1 
  -6   4   4 -3.6987 8.14874   3 
   6   4  -4 8.78983 6.08160   3 
  -4  -4   4 -6.5434 15.1373   2 
   4  -4  -4 9.04710 14.4315   1 
   4   4  -4 6.89846 6.35003   1 
  -4   4   4 -6.0319 9.62014   2 
   4   4  -4 2.94112 6.04053   3 
  -4   4   4 11.2547 8.80870   3 
  -2  -4   4 83.9045 23.4379   2 
   2  -4  -4 55.5038 15.2916   1 
  -2   4   4 41.7723 10.9767   3 
   2   4  -4 66.9048 10.8158   3 
   2   4  -4 57.8277 7.94159   1 
   0  -4   4 11.0813 17.0129   2 
   0  -4  -4 8.91981 9.06722   2 
   0  -4  -4 8.80808 10.0280   1 
   0   4   4 0.46465 8.19703   3 
   0   4  -4 8.70078 7.07031   3 
   2  -4   4 -6.0166 16.4941   2 
   2  -4   4 9.92492 4.82936   1 
  -2  -4  -4 -5.9744 8.69249   2 
  -2  -4  -4 3.29301 9.89150   1 
  -2   4  -4 3.19881 7.04390   3 
   2   4   4 -0.7392 8.29546   3 
   4  -4   4 151.587 15.3690   1 
  -4  -4  -4 176.480 19.7627   2 
  -4  -4  -4 169.317 20.4602   1 
  -4   4  -4 169.077 16.1092   3 
   4   4   4 151.153 16.8216   3 
  -4   4  -4 215.497 27.6408   2 
  -6  -4  -4 84.2327 20.9088   2 
   6  -4   4 107.722 18.1837   1 
  -6  -4  -4 107.160 20.1306   1 
   6   4   4 93.6176 15.0003   3 
  -6   4  -4 153.397 17.1430   3 
  -6   4  -4 104.997 23.2154   2 
  -8  -4  -4 181.184 30.6243   2 
   8  -4   4 174.900 26.5355   1 
  -8   4  -4 156.837 30.3056   2 
  -8   4  -4 148.084 17.8035   3 
   8   4   4 169.477 17.7960   3 
   8   4   4 162.337 26.3218   1 
 -10  -4  -4 30.9359 22.9327   2 
  10  -4   4 21.7892 18.6627   1 
  10   4   4 -19.544 12.9180   1 
 -10   4  -4 31.1279 25.8897   2 
  12  -4   4 5.20461 19.2735   1 
 -12  -4  -4 -27.962 18.7812   2 
 -12   4  -4 -24.613 19.0268   2 
  12   4   4 49.7053 21.7996   1 
 -13  -5   4 85.5221 32.7927   2 
  13  -5  -4 121.373 35.6609   1 
  13   5  -4 151.342 33.3668   1 
 -13   5   4 160.202 38.0159   2 
  11  -5  -4 16.0794 24.6189   1 
 -11  -5   4 38.6926 23.4078   2 
 -11   5   4 23.3716 24.2491   2 
  11   5  -4 -7.7846 13.7767   1 
  -9  -5   4 104.324 27.9614   2 
   9  -5  -4 67.3068 26.3906   1 
  -9   5   4 101.130 25.7903   2 
  -9   5   4 83.9826 15.5589   3 
   9   5  -4 74.6861 20.9815   1 
   7  -5  -4 110.363 26.1219   1 
  -7  -5   4 81.3736 26.8825   2 
   7   5  -4 101.032 13.1577   3 
  -7   5   4 144.067 25.6346   2 
   7   5  -4 97.1021 17.7952   1 
  -7   5   4 105.535 17.4883   3 
   5  -5  -4 91.5636 21.8296   1 
  -5  -5   4 51.3945 22.8120   2 
  -5   5   4 119.738 19.9913   2 
   5   5  -4 94.2132 13.1491   3 
   5   5  -4 76.1701 13.3969   1 
  -5   5   4 89.6948 15.2598   3 
  -3  -5   4 453.162 39.7444   2 
   3  -5  -4 484.888 35.3368   1 
  -3   5   4 437.738 30.2905   3 
  -3   5   4 478.898 29.8591   2 
   3   5  -4 557.293 30.0792   3 
   3   5  -4 497.538 25.7907   1 
   1  -5  -4 1942.55 86.7508   1 
   1  -5  -4 2082.18 84.5881   2 
  -1  -5   4 1799.32 95.9298   2 
  -1   5   4 1820.28 86.2353   3 
   1   5  -4 2054.61 85.6568   3 
  -1  -5  -4 200.850 18.2424   2 
   1  -5   4 215.114 30.9660   2 
  -1  -5  -4 212.209 21.1413   1 
   1   5   4 205.459 19.9656   3 
  -1   5  -4 186.613 18.6365   3 
   3  -5   4 832.332 40.8757   1 
  -3  -5  -4 928.079 47.1013   2 
   3  -5   4 789.434 57.7604   2 
  -3  -5  -4 925.725 49.4654   1 
   3   5   4 933.064 46.9059   3 
  -3   5  -4 883.859 45.9126   3 
  -5  -5  -4 349.143 28.9340   1 
  -5  -5  -4 308.989 28.7186   2 
   5  -5   4 307.861 23.7976   1 
  -5   5  -4 357.244 34.7935   2 
  -5   5  -4 274.576 23.6955   3 
   5   5   4 350.605 25.8997   3 
   7  -5   4 85.4307 19.3527   1 
  -7  -5  -4 124.924 24.8163   2 
  -7  -5  -4 99.2215 22.3339   1 
  -7   5  -4 77.6710 25.6538   2 
   7   5   4 91.7660 16.5550   3 
  -7   5  -4 71.9280 14.2778   3 
   9  -5   4 490.823 40.4032   1 
  -9  -5  -4 552.262 45.5205   2 
   9   5   4 514.064 42.4414   1 
  -9   5  -4 433.796 45.8509   2 
  11  -5   4 -12.127 17.9635   1 
 -11  -5  -4 49.1929 24.5725   2 
  11   5   4 47.0806 23.2826   1 
 -11   5  -4 29.3301 28.9949   2 
  12  -6  -4 -21.431 28.1054   1 
 -12  -6   4 24.3880 22.4948   2 
 -12   6   4 23.4677 28.7122   2 
  12   6  -4 35.6267 22.0245   1 
  10  -6  -4 -15.909 24.4611   1 
 -10  -6   4 26.3114 20.7584   2 
 -10   6   4 -14.871 22.5416   2 
  10   6  -4 16.2399 17.3693   1 
  -8  -6   4 157.253 33.5493   2 
   8  -6  -4 178.546 32.9118   1 
  -8   6   4 243.775 35.0970   2 
   8   6  -4 169.295 24.3687   1 
  -8   6   4 202.174 25.3290   3 
   8   6  -4 166.381 17.5696   3 
   6  -6  -4 276.196 35.7275   1 
  -6  -6   4 245.381 37.6117   2 
  -6   6   4 294.871 26.3086   3 
  -6   6   4 324.132 31.1078   2 
   6   6  -4 242.476 23.5157   1 
   6   6  -4 260.908 21.0577   3 
   4  -6  -4 371.666 34.3996   1 
  -4  -6   4 297.725 39.4224   2 
  -4   6   4 373.083 29.2291   2 
   4   6  -4 389.384 26.1088   3 
   4   6  -4 369.466 22.9379   1 
  -4   6   4 335.582 27.1133   3 
   2  -6  -4 537.864 35.3174   1 
   2  -6  -4 537.556 34.3071   2 
  -2  -6   4 466.163 46.2249   2 
   2   6  -4 487.640 31.6045   3 
   2   6  -4 495.153 23.9577   1 
  -2   6   4 472.232 33.4354   3 
   0  -6  -4 467.062 31.7366   2 
   0  -6  -4 460.845 32.4454   1 
   0  -6   4 387.849 41.3666   2 
   0   6  -4 430.139 29.1312   3 
   0   6   4 457.078 31.2501   3 
  -2  -6  -4 149.334 20.4229   2 
  -2  -6  -4 138.328 21.5790   1 
   2  -6   4 64.7944 24.3410   2 
   2   6   4 130.195 19.0403   3 
  -2   6  -4 109.574 17.9038   3 
   4  -6   4 508.330 29.7199   1 
  -4  -6  -4 515.174 36.3418   2 
  -4  -6  -4 527.786 37.6760   1 
   4  -6   4 458.641 49.4320   2 
  -4   6  -4 532.832 35.0048   3 
   4   6   4 509.018 33.9191   3 
   6  -6   4 38.5120 14.7425   1 
  -6  -6  -4 39.0093 17.2593   1 
  -6  -6  -4 56.5184 20.1780   2 
  -6   6  -4 15.9049 20.7993   2 
  -6   6  -4 50.1793 14.4908   3 
   6   6   4 40.4579 14.3408   3 
  -8  -6  -4 360.293 36.8959   2 
   8  -6   4 367.528 34.1011   1 
   8   6   4 384.947 28.1813   3 
  -8   6  -4 418.307 45.0004   2 
  -8   6  -4 383.327 29.0947   3 
  10  -6   4 69.6002 24.5616   1 
 -10  -6  -4 98.7926 29.1555   2 
 -10   6  -4 69.8077 31.4723   2 
  10   6   4 93.6757 25.6357   1 
  12  -6   4 -4.5569 22.1771   1 
 -12  -6  -4 -3.9299 25.9869   2 
  12   6   4 51.1399 27.6647   1 
 -12   6  -4 20.9972 33.3911   2 
 -11  -7   4 7.89108 22.7406   2 
  11  -7  -4 13.4655 30.6328   1 
 -11   7   4 0.85562 27.6164   2 
  11   7  -4 24.0057 18.7653   1 
  -9  -7   4 43.4784 27.3461   2 
   9  -7  -4 75.6038 32.7931   1 
  -9   7   4 69.1614 27.2017   2 
  -9   7   4 83.4991 19.7533   3 
   9   7  -4 72.2625 20.3049   1 
  -7  -7   4 753.250 60.8490   2 
   7  -7  -4 884.034 60.4129   1 
   7   7  -4 833.744 45.2549   3 
  -7   7   4 854.375 56.9346   2 
  -7   7   4 961.268 51.2669   3 
   7   7  -4 825.532 49.1069   1 
  -5  -7   4 30.7458 27.8124   2 
   5  -7  -4 12.4104 24.4736   1 
   5   7  -4 38.5477 10.8464   1 
   5   7  -4 26.8553 11.2136   3 
  -5   7   4 30.3240 16.1792   3 
  -5   7   4 52.6871 22.8437   2 
  -3  -7   4 14.8855 28.9649   2 
   3  -7  -4 -13.868 15.3027   2 
   3  -7  -4 7.23538 17.9185   1 
   3   7  -4 11.6525 7.38773   1 
  -3   7   4 -16.915 11.3687   3 
   3   7  -4 -0.9206 9.05466   3 
  -1  -7   4 622.871 55.7019   2 
   1  -7  -4 653.691 43.1763   2 
   1  -7  -4 631.793 40.5766   1 
   1   7  -4 694.074 40.3659   3 
  -1   7   4 581.275 39.8973   3 
  -1  -7  -4 66.8576 18.4283   1 
  -1  -7  -4 70.8524 19.0263   2 
   1  -7   4 36.3604 28.5268   2 
  -1   7  -4 40.4080 13.5018   3 
   1   7   4 56.1147 16.8412   3 
   3  -7   4 182.352 36.9110   2 
  -3  -7  -4 210.398 28.7256   2 
  -3  -7  -4 178.122 25.7450   1 
  -3   7  -4 192.221 24.0062   3 
   3   7   4 194.313 24.6823   3 
  -5  -7  -4 215.871 30.8591   2 
  -5  -7  -4 191.012 27.4953   1 
   5  -7   4 142.061 40.8750   2 
   5  -7   4 169.877 22.8993   1 
   5   7   4 209.895 25.5730   3 
  -5   7  -4 179.741 24.8347   3 
   7  -7   4 -14.089 14.4912   1 
  -7  -7  -4 -3.4086 14.9190   2 
  -7  -7  -4 5.56442 16.4960   1 
  -7   7  -4 0.50643 12.8308   3 
  -7   7  -4 -24.367 19.2842   2 
   7   7   4 2.30562 11.7108   3 
  -9  -7  -4 208.512 36.9738   2 
   9  -7   4 167.175 30.1066   1 
  -9   7  -4 214.694 26.4259   3 
  -9   7  -4 152.550 37.7651   2 
   9   7   4 195.998 34.0737   1 
  11  -7   4 -31.155 25.0185   1 
 -11  -7  -4 62.8708 30.3988   2 
 -11   7  -4 -13.229 27.1686   2 
  11   7   4 -17.205 15.7796   1 
 -12  -8   4 37.8879 30.6052   2 
  12  -8  -4 -39.813 35.6193   1 
  12   8  -4 20.7544 24.8005   1 
 -12   8   4 -3.0536 31.8463   2 
  10  -8  -4 -61.934 28.6763   1 
 -10  -8   4 -4.7254 22.3505   2 
 -10   8   4 -36.360 22.9554   2 
  10   8  -4 -18.081 15.3221   1 
  -8  -8   4 -30.793 22.0314   2 
   8  -8  -4 8.53293 27.9828   1 
  -8   8   4 23.6022 26.8697   2 
   8   8  -4 -1.9119 13.5407   1 
   8   8  -4 -2.3275 10.1892   3 
  -8   8   4 21.9880 16.8927   3 
  -6  -8   4 -27.414 22.6705   2 
   6  -8  -4 -14.758 25.6865   1 
   6   8  -4 7.20559 10.2393   1 
  -6   8   4 2.94405 14.5906   3 
  -6   8   4 -13.067 21.8758   2 
   6   8  -4 2.49751 10.2103   3 
   4  -8  -4 30.9567 23.6054   1 
   4  -8  -4 24.1186 23.2260   2 
  -4  -8   4 -3.0281 29.5004   2 
  -4   8   4 0.56977 14.9889   3 
   4   8  -4 1.23696 11.4266   3 
   4   8  -4 3.22237 8.75052   1 
   2  -8  -4 73.9542 25.7160   2 
   2  -8  -4 116.011 23.8299   1 
  -2  -8   4 62.5307 37.7219   2 
  -2   8   4 65.1193 19.2181   3 
   2   8  -4 72.4574 17.3179   3 
   0  -8   4 67.4206 35.3038   2 
   0  -8  -4 140.502 28.9913   2 
   0  -8  -4 104.584 22.1625   1 
   0   8  -4 106.429 20.2397   3 
   0   8   4 81.6174 19.9398   3 
  -2  -8  -4 56.8529 19.5001   1 
  -2  -8  -4 78.3315 22.2962   2 
   2  -8   4 54.0411 32.8671   2 
   2   8   4 70.2157 19.2298   3 
  -2   8  -4 60.3392 18.4024   3 
   4  -8   4 184.176 40.3951   2 
  -4  -8  -4 214.046 30.8694   1 
  -4  -8  -4 218.342 30.6585   2 
   4   8   4 204.001 27.2897   3 
  -4   8  -4 237.002 27.2935   3 
  -6  -8  -4 22.1909 18.3876   2 
  -6  -8  -4 23.4555 16.5134   1 
   6  -8   4 -32.007 24.7911   2 
  -6   8  -4 -8.0197 14.4294   3 
   6   8   4 -2.7187 13.1342   3 
  -8  -8  -4 71.2036 25.3954   2 
  -8  -8  -4 61.0387 21.2632   1 
  -8   8  -4 66.6146 19.5973   3 
  -8   8  -4 56.2551 30.8426   2 
   8   8   4 43.4594 17.3124   3 
 -10  -8  -4 -23.816 20.9897   2 
 -10   8  -4 17.8569 31.1964   2 
  10   8   4 4.07465 18.7741   1 
  11  -9  -4 -13.911 36.9110   1 
 -11  -9   4 4.50410 28.2931   2 
 -11   9   4 -0.6963 32.0454   2 
  11   9  -4 -17.281 18.2980   1 
   9  -9  -4 28.2567 34.8112   1 
  -9  -9   4 19.5139 24.6175   2 
  -9   9   4 -5.1726 26.4525   2 
   9   9  -4 21.1974 16.6257   1 
  -9   9   4 -6.5438 16.8776   3 
  -7  -9   4 42.7325 30.5432   2 
   7  -9  -4 9.59256 28.4806   1 
   7   9  -4 -4.4883 12.9845   1 
  -7   9   4 20.8591 20.7012   3 
   7   9  -4 -24.034 10.7211   3 
   5  -9  -4 -4.9046 24.8574   2 
  -5  -9   4 25.8199 27.7919   2 
   5  -9  -4 -11.725 22.2851   1 
   5   9  -4 33.8357 11.7464   1 
  -5   9   4 1.50936 16.0273   3 
   5   9  -4 14.3962 13.8697   3 
   3  -9  -4 -0.1468 19.7019   1 
   3  -9  -4 42.0620 26.7563   2 
  -3  -9   4 -1.8344 33.3168   2 
   3   9  -4 17.7552 14.6038   3 
  -3   9   4 7.28193 15.9572   3 
  -1  -9   4 83.2210 40.6862   2 
   1  -9  -4 146.769 33.2616   2 
   1  -9  -4 140.865 25.9051   1 
  -1   9   4 156.751 26.4971   3 
   1   9  -4 164.218 26.0687   3 
  -1  -9  -4 85.1868 22.2439   1 
   1  -9   4 72.8700 40.5232   2 
  -1  -9  -4 67.5997 26.0079   2 
   1   9   4 103.206 22.2836   3 
  -1   9  -4 91.2710 20.7435   3 
  -3  -9  -4 86.0522 21.5625   1 
   3  -9   4 63.9251 36.7368   2 
  -3  -9  -4 110.408 26.2267   2 
  -3   9  -4 73.8211 21.7706   3 
   3   9   4 79.4318 21.4574   3 
  -5  -9  -4 5.24638 15.7739   1 
  -5  -9  -4 43.0297 20.7577   2 
   5  -9   4 42.1197 31.2749   2 
   5   9   4 -10.172 13.8952   3 
  -5   9  -4 -0.3205 16.6550   3 
  -7  -9  -4 79.5897 23.9748   1 
  -7  -9  -4 90.4445 27.0499   2 
   7  -9   4 45.9530 31.2663   2 
  -7   9  -4 77.7878 22.0728   3 
   7   9   4 37.1998 18.1916   3 
  -9  -9  -4 110.747 30.0158   2 
  -9   9  -4 126.159 23.5745   3 
   9   9   4 59.4150 22.7339   1 
  10 -10  -4 -2.5853 37.8755   1 
 -10 -10   4 -2.8304 30.1797   2 
 -10  10   4 -5.8131 34.2868   2 
  -8 -10   4 42.0513 28.6333   2 
   8 -10  -4 167.065 38.1667   2 
   8 -10  -4 -0.5698 32.2691   1 
   8  10  -4 0.38045 13.3070   3 
  -8  10   4 24.0118 22.9447   3 
   6 -10  -4 87.5923 31.0421   1 
  -6 -10   4 54.4167 33.2759   2 
   6 -10  -4 55.7729 31.6866   2 
   6  10  -4 9.41279 15.6816   3 
  -6  10   4 31.7950 24.1474   3 
  -4 -10   4 49.9054 33.6190   2 
   4 -10  -4 10.0615 20.4129   1 
   4 -10  -4 13.8336 28.1612   2 
  -4  10   4 -11.138 18.2306   3 
   4  10  -4 -2.0515 14.2720   3 
   2 -10  -4 33.4523 28.7922   2 
  -2 -10   4 -42.521 35.2081   2 
   2 -10  -4 53.6330 21.5438   1 
  -2  10   4 31.6408 20.1460   3 
   2  10  -4 10.2992 15.3371   3 
   0 -10   4 -16.318 34.6250   2 
   0 -10  -4 -6.2970 15.1390   1 
   0 -10  -4 -7.6549 25.3561   2 
   0  10   4 -8.2904 14.8341   3 
   0  10  -4 0.53318 15.1245   3 
  -2 -10  -4 -28.435 12.2480   1 
  -2 -10  -4 37.4625 21.5444   2 
   2 -10   4 -5.2102 35.0174   2 
  -2  10  -4 -34.704 13.0195   3 
   2  10   4 5.67039 17.5691   3 
  -4 -10  -4 1.68138 17.3482   1 
  -4 -10  -4 45.6017 23.0325   2 
   4 -10   4 -36.139 30.9964   2 
   4  10   4 10.0739 17.8850   3 
  -4  10  -4 21.5890 18.9369   3 
   6 -10   4 8.57735 35.9490   2 
  -6 -10  -4 35.0904 22.6545   2 
  -6 -10  -4 43.5097 20.2558   1 
   6  10   4 -8.0796 16.2496   3 
  -6  10  -4 17.9737 18.7132   3 
   8 -10   4 -10.250 30.6177   2 
  -8 -10  -4 71.4123 25.5844   2 
   8  10   4 11.9449 24.7266   3 
  -8  10  -4 32.9390 21.8537   3 
  -9 -11   4 -47.465 24.5155   2 
   9 -11  -4 102.821 37.7111   2 
  -9  11   4 2.12251 23.0436   3 
  -7 -11   4 126.900 35.7418   2 
   7 -11  -4 106.314 33.0638   1 
   7 -11  -4 87.1907 38.3808   2 
   7  11  -4 28.1450 17.5822   3 
  -7  11   4 81.5892 27.7237   3 
   5 -11  -4 40.2270 23.8990   1 
   5 -11  -4 -34.169 27.3376   2 
  -5 -11   4 13.9107 31.7575   2 
  -5  11   4 -1.7629 18.1106   3 
   5  11  -4 -13.203 13.2975   3 
  -3 -11   4 -42.323 33.4865   2 
   3 -11  -4 24.8059 20.8947   1 
   3 -11  -4 -3.3617 32.0911   2 
   3  11  -4 3.09658 16.7095   3 
  -3  11   4 17.4916 18.7618   3 
   1 -11  -4 183.453 38.6371   2 
  -1 -11   4 133.572 45.4218   2 
   1 -11  -4 165.764 28.6416   1 
   1  11  -4 134.335 27.9309   3 
  -1  11   4 215.105 32.0455   3 
  -1 -11  -4 21.4769 25.1121   2 
  -1 -11  -4 21.6060 18.1990   1 
   1 -11   4 -27.652 37.7988   2 
  -1  11  -4 4.63577 19.1648   3 
   1  11   4 -26.637 15.3088   3 
   3 -11   4 36.2851 42.2974   2 
  -3 -11  -4 134.498 27.6682   2 
  -3 -11  -4 96.7104 24.9371   1 
  -3  11  -4 103.063 27.5155   3 
   3  11   4 58.6646 23.3062   3 
   5 -11   4 30.6071 42.3913   2 
  -5 -11  -4 152.859 31.0032   2 
  -5 -11  -4 72.5399 24.3291   1 
   5  11   4 48.6729 22.2620   3 
  -5  11  -4 108.794 29.5347   3 
  -7 -11  -4 17.7017 22.1180   1 
   7 -11   4 20.3856 40.1726   2 
  -7 -11  -4 26.7074 25.7633   2 
  -7  11  -4 -16.060 18.0621   3 
   7  11   4 -12.816 18.2538   3 
  -8 -12   4 42.8964 29.3918   2 
   8 -12  -4 67.8145 41.3383   2 
   8  12  -4 -1.5970 17.2398   3 
  -8  12   4 57.4632 27.6682   3 
   6 -12  -4 -15.704 35.9687   2 
  -6 -12   4 57.0064 36.8372   2 
   6  12  -4 1.90461 19.4107   3 
  -6  12   4 27.2215 26.2127   3 
  -4 -12   4 28.2564 35.7808   2 
   4 -12  -4 -64.163 31.5728   2 
  -4  12   4 13.8790 22.4882   3 
   4  12  -4 13.0827 18.6917   3 
  -2 -12   4 61.8592 43.7112   2 
   2 -12  -4 -1.6499 33.5987   2 
   2 -12  -4 84.1901 23.6130   1 
   2  12  -4 35.5904 22.8976   3 
  -2  12   4 25.7272 24.1759   3 
   0 -12  -4 114.514 24.7067   1 
   0 -12   4 -6.6598 42.1606   2 
   0 -12  -4 33.0756 29.8517   2 
   0  12  -4 30.8223 21.8180   3 
   0  12   4 21.2253 21.5496   3 
   2 -12   4 -4.8443 43.3229   2 
  -2 -12  -4 34.9448 19.6934   1 
  -2 -12  -4 31.7811 37.2473   2 
   2  12   4 -13.993 17.9060   3 
  -2  12  -4 46.3480 25.0159   3 
   4 -12   4 -18.134 44.4889   2 
  -4 -12  -4 22.3400 20.8418   1 
  -4  12  -4 85.1092 28.7498   3 
   4  12   4 51.9652 23.3435   3 
  -6 -12  -4 32.5894 21.3772   1 
   6 -12   4 33.3995 46.8353   2 
   6  12   4 -9.4277 18.4621   3 
  -6  12  -4 24.4561 25.1019   3 
  -5 -13   4 54.2233 37.9892   2 
   5  13  -4 1.79261 19.6716   3 
  -5  13   4 -13.142 20.4260   3 
  -3 -13   4 93.7049 42.6895   2 
  -3  13   4 40.1757 24.2170   3 
   3  13  -4 31.6833 23.5785   3 
  -1 -13   4 61.3884 48.7471   2 
  -1  13   4 99.2036 27.1708   3 
   1  13  -4 111.917 29.4621   3 
   1 -13   4 5.83269 50.0988   2 
  -1  13  -4 -51.627 18.7082   3 
   1  13   4 -52.660 19.0129   3 
   3 -13   4 52.4611 53.4389   2 
   3  13   4 39.9553 23.1151   3 
  -3  13  -4 16.0598 22.7608   3 
   5 -13   4 -2.1283 50.5794   2 
   5  13   4 41.8076 24.4194   3 
  -5  13  -4 5.17203 28.7521   3 
  -2 -14   4 21.1658 45.8758   2 
  -2  14   4 52.9266 29.1772   3 
   2  14  -4 45.0456 26.9653   3 
   0 -14   4 18.7992 52.5332   2 
   0  14  -4 4.07477 24.4256   3 
   0  14   4 -7.7791 24.9874   3 
   2 -14   4 29.6540 55.3450   2 
   2  14   4 -0.2238 24.0467   3 
  -2  14  -4 50.0107 30.6294   3 
  14   0  -5 54.9058 26.8380   1 
 -14   0   5 56.1218 28.1026   2 
  12   0  -5 235.122 36.8856   1 
 -12   0   5 275.955 40.6542   2 
 -10   0   5 16.6110 17.3083   2 
  10   0  -5 45.9817 19.9690   1 
   8   0  -5 32.3329 16.0612   1 
  -8   0   5 25.8472 18.1250   2 
   6   0  -5 148.744 20.0448   1 
  -6   0   5 159.840 23.7310   2 
  -6   0   5 141.724 12.2413   3 
  -4   0   5 321.150 20.7074   3 
  -4   0   5 322.469 24.6638   2 
   4   0  -5 321.788 23.2337   1 
   2   0  -5 2157.36 87.0901   1 
   2   0  -5 2062.93 85.3522   3 
  -2   0   5 1951.71 85.4088   2 
   0   0   5 677.608 32.8657   2 
   0   0  -5 632.698 32.5420   3 
   0   0  -5 657.356 33.0462   1 
  -2   0  -5 8872.84 348.827   1 
  -2   0  -5 8960.14 347.816   2 
  -2   0  -5 8952.11 347.572   3 
  -4   0  -5 1813.82 82.3335   2 
  -4   0  -5 1812.04 81.4708   1 
  -4   0  -5 1798.68 77.5397   3 
  -6   0  -5 563.469 38.5729   2 
   6   0   5 569.249 32.8891   3 
   8   0   5 69.3379 19.7910   1 
   8   0   5 71.0012 13.4527   3 
  -8   0  -5 84.1235 23.7088   2 
 -10   0  -5 205.173 36.0483   2 
  10   0   5 180.213 31.2290   1 
  12   0   5 19.5976 19.6206   1 
 -12   0  -5 16.0674 23.2358   2 
 -13  -1   5 260.168 41.8741   2 
  13  -1  -5 190.144 36.1469   1 
  13   1  -5 230.229 37.4100   1 
 -11  -1   5 55.6323 21.5868   2 
  11  -1  -5 17.7049 18.5910   1 
 -11   1   5 57.3614 23.1600   2 
  11   1  -5 44.1001 21.4100   1 
   9  -1  -5 252.471 29.0514   1 
  -9  -1   5 184.783 31.3062   2 
  -9   1   5 238.176 30.6628   2 
   9   1  -5 189.440 27.4771   1 
  -7  -1   5 1287.93 71.9664   2 
   7  -1  -5 1266.64 68.5099   1 
  -7  -1   5 1388.08 57.8746   3 
  -7   1   5 1388.00 57.7595   3 
   7   1  -5 1440.85 68.6889   1 
  -7   1   5 1388.00 70.6022   2 
  -5  -1   5 349.943 28.9872   2 
   5  -1  -5 406.495 28.4400   1 
  -5   1   5 406.814 28.3040   2 
   5   1  -5 375.905 26.1337   1 
   5   1  -5 370.096 20.8188   3 
  -5   1   5 350.938 21.0768   3 
   3  -1  -5 2939.34 125.066   1 
  -3  -1   5 2984.73 126.552   2 
  -3   1   5 2915.56 123.305   2 
  -3   1   5 3205.85 123.890   3 
   3   1  -5 3039.27 123.156   1 
   3   1  -5 3078.11 121.907   3 
   1  -1  -5 172.409 12.3320   2 
  -1  -1   5 209.958 21.1562   2 
   1  -1  -5 169.955 17.8756   1 
   1   1  -5 169.688 13.7972   3 
  -1   1   5 176.283 16.0860   3 
   1   1  -5 162.969 14.5527   1 
   1  -1   5 143.510 18.8653   2 
  -1  -1  -5 153.643 10.6955   2 
  -1  -1  -5 148.613 15.4737   1 
  -1   1  -5 146.225 13.4105   1 
  -1   1  -5 163.184 13.8251   3 
   1   1   5 165.128 16.1066   3 
  -3  -1  -5 2599.60 109.370   2 
  -3  -1  -5 2618.12 111.539   1 
  -3   1  -5 2596.22 111.249   2 
  -3   1  -5 2649.52 109.431   1 
   3   1   5 2534.98 109.298   3 
  -3   1  -5 2657.84 108.145   3 
  -5  -1  -5 0.93613 9.51627   1 
  -5  -1  -5 17.9010 10.1190   2 
  -5   1  -5 -0.7190 8.48749   3 
   5   1   5 4.26408 8.41838   3 
  -5   1  -5 33.9629 13.9103   2 
  -5   1  -5 18.2452 11.3844   1 
  -7  -1  -5 13.3162 14.5298   2 
   7  -1   5 27.0634 13.2069   1 
  -7   1  -5 35.2990 16.5845   2 
   7   1   5 31.2905 10.2030   3 
   7   1   5 30.5415 13.1750   1 
  -7   1  -5 25.8406 9.97383   3 
   9  -1   5 543.217 42.7427   1 
  -9  -1  -5 535.604 44.2860   2 
   9   1   5 515.110 42.8242   1 
  -9   1  -5 443.732 43.1807   2 
 -11  -1  -5 2.13941 19.5221   2 
  11  -1   5 54.8682 22.5168   1 
 -11   1  -5 50.6808 24.4859   2 
  11   1   5 61.4483 21.5787   1 
 -13  -1  -5 85.2275 31.7023   2 
  13  -1   5 24.0752 24.0892   1 
  13   1   5 80.1802 27.7194   1 
 -13   1  -5 107.288 35.6297   2 
 -14  -2   5 4.23216 20.1991   2 
  14  -2  -5 -18.713 24.1747   1 
  14   2  -5 -46.719 17.0643   1 
 -14   2   5 -11.439 22.5062   2 
 -12  -2   5 -0.6172 19.0376   2 
  12  -2  -5 18.2084 22.6939   1 
 -12   2   5 19.9293 22.5766   2 
  12   2  -5 10.4149 19.1640   1 
  10  -2  -5 12.3847 19.2809   1 
 -10  -2   5 0.50645 16.5446   2 
 -10   2   5 -3.3608 18.8283   2 
  10   2  -5 -16.254 13.2403   1 
  -8  -2   5 339.212 34.7248   2 
   8  -2  -5 383.408 33.1041   1 
  -8   2   5 363.575 33.7654   2 
   8   2  -5 377.604 31.5493   1 
  -8   2   5 355.372 21.1942   3 
  -6  -2   5 562.281 41.3681   2 
   6  -2  -5 684.708 39.9737   1 
   6   2  -5 669.911 37.7437   1 
   6   2  -5 643.877 30.5952   3 
  -6   2   5 587.344 31.2026   3 
  -6   2   5 639.926 39.0374   2 
   4  -2  -5 24.6461 13.6327   1 
  -4  -2   5 -1.6689 14.4967   2 
  -4   2   5 7.93089 8.88592   2 
   4   2  -5 11.4192 5.89353   3 
  -4   2   5 20.8707 7.46329   3 
   4   2  -5 17.3105 9.09992   1 
  -2  -2   5 464.692 32.1991   2 
   2  -2  -5 450.752 28.9071   1 
  -2   2   5 428.161 21.0737   2 
   2   2  -5 439.460 24.0240   3 
   2   2  -5 444.703 23.8613   1 
  -2   2   5 375.937 24.7377   3 
   0  -2   5 137.544 19.6262   2 
   0  -2  -5 110.902 15.9971   1 
   0   2   5 115.304 13.7986   3 
   0   2  -5 94.1047 10.3751   1 
   0   2  -5 117.903 11.8223   3 
  -2  -2  -5 56.4586 13.6038   1 
  -2  -2  -5 64.6769 10.0599   2 
  -2   2  -5 46.2165 12.5648   2 
  -2   2  -5 44.8472 9.95493   3 
   2   2   5 48.9583 11.0763   3 
  -2   2  -5 57.4381 9.86023   1 
  -4  -2  -5 259.944 22.0290   2 
  -4  -2  -5 254.004 22.7541   1 
   4   2   5 260.498 20.3660   3 
  -4   2  -5 269.259 19.8816   3 
  -4   2  -5 255.054 23.7671   2 
  -4   2  -5 296.882 21.2870   1 
   6  -2   5 271.029 25.0473   1 
  -6  -2  -5 257.359 26.5214   1 
  -6  -2  -5 243.435 26.0747   2 
  -6   2  -5 280.009 29.3463   2 
  -6   2  -5 267.504 20.8447   3 
   6   2   5 248.565 20.0514   3 
   8  -2   5 186.901 28.8786   1 
  -8  -2  -5 196.319 31.2828   2 
  -8   2  -5 174.067 17.7766   3 
   8   2   5 154.942 25.5327   1 
   8   2   5 168.579 17.2609   3 
  -8   2  -5 175.644 30.5023   2 
  10  -2   5 37.4175 19.6191   1 
 -10  -2  -5 72.9425 26.1262   2 
  10   2   5 30.4920 17.2859   1 
 -10   2  -5 41.4350 24.6134   2 
  12  -2   5 23.5927 21.1880   1 
 -12  -2  -5 46.2079 25.0342   2 
 -12   2  -5 7.44272 24.6455   2 
  12   2   5 23.9648 20.2431   1 
  13  -3  -5 47.2680 27.6058   1 
 -13  -3   5 53.5452 25.5878   2 
  13   3  -5 92.7606 29.8013   1 
 -13   3   5 96.5520 31.2613   2 
  11  -3  -5 121.226 29.1490   1 
 -11  -3   5 109.022 28.9003   2 
 -11   3   5 130.223 30.2997   2 
  11   3  -5 103.365 26.0146   1 
   9  -3  -5 48.3787 22.2086   1 
  -9  -3   5 33.9048 21.2285   2 
   9   3  -5 26.1021 16.6698   1 
  -9   3   5 50.3774 20.7919   2 
  -9   3   5 47.4230 10.6668   3 
  -7  -3   5 610.471 45.1971   2 
   7  -3  -5 594.343 41.7565   1 
  -7   3   5 668.619 42.7866   2 
   7   3  -5 601.596 38.9883   1 
   7   3  -5 593.292 29.9395   3 
  -7   3   5 638.487 32.8257   3 
  -5  -3   5 447.005 35.6916   2 
   5  -3  -5 414.085 31.9785   1 
  -5   3   5 451.342 26.2903   3 
   5   3  -5 452.788 24.2801   3 
  -5   3   5 386.676 28.8014   2 
   5   3  -5 478.989 28.7072   1 
   3  -3  -5 1289.74 61.6048   1 
  -3  -3   5 1276.28 65.1202   2 
  -3   3   5 1191.13 56.7024   3 
  -3   3   5 1295.04 55.0930   2 
   3   3  -5 1199.52 55.4006   3 
   3   3  -5 1237.51 54.7545   1 
   1  -3  -5 119.663 17.4958   1 
  -1  -3   5 101.895 22.0231   2 
   1   3  -5 110.091 12.4737   3 
  -1   3   5 94.3149 13.8713   3 
   1   3  -5 97.9163 9.71017   1 
  -1  -3  -5 12.0464 10.6226   1 
  -1  -3  -5 17.5775 5.04950   2 
   1  -3   5 12.0017 15.9763   2 
  -1   3  -5 7.05691 5.63443   1 
  -1   3  -5 35.3182 8.71354   3 
   1   3   5 26.4424 9.93290   3 
   1   3   5 17.8882 8.49707   2 
  -3  -3  -5 873.391 47.5355   1 
   3  -3   5 885.961 42.9239   1 
  -3  -3  -5 897.082 44.0018   2 
  -3   3  -5 888.192 43.9557   3 
   3   3   5 885.311 45.1501   3 
  -3   3  -5 933.783 49.8564   2 
  -5  -3  -5 34.2290 13.6847   1 
  -5  -3  -5 39.9010 14.6283   2 
   5  -3   5 48.7059 13.0931   1 
  -5   3  -5 19.5188 13.9863   2 
  -5   3  -5 47.8087 11.5059   3 
   5   3   5 37.7048 10.8621   3 
  -7  -3  -5 32.5655 15.2560   1 
   7  -3   5 31.3465 15.2783   1 
  -7  -3  -5 59.7193 18.8022   2 
  -7   3  -5 58.5973 13.6946   3 
   7   3   5 32.5235 11.3374   3 
  -7   3  -5 48.2278 21.1190   2 
   9  -3   5 654.522 45.6584   1 
  -9  -3  -5 577.046 46.8138   2 
  -9   3  -5 586.999 49.5358   2 
   9   3   5 567.842 45.3862   1 
 -11  -3  -5 24.3054 22.5658   2 
  11  -3   5 14.3289 17.5985   1 
  11   3   5 37.2038 19.5867   1 
 -11   3  -5 -6.6180 24.9785   2 
 -14  -4   5 38.1535 24.0444   2 
  14  -4  -5 32.4537 33.2206   1 
  14   4  -5 29.3580 27.7884   1 
 -14   4   5 20.9587 27.7389   2 
 -12  -4   5 197.266 35.7959   2 
  12  -4  -5 234.809 39.1644   1 
 -12   4   5 241.111 39.8690   2 
  12   4  -5 227.637 36.8830   1 
  10  -4  -5 1.11468 20.5962   1 
 -10  -4   5 19.7071 21.5426   2 
  10   4  -5 28.6444 17.0314   1 
 -10   4   5 29.0073 20.8731   2 
   8  -4  -5 31.3717 22.2195   1 
  -8  -4   5 -15.743 17.4359   2 
  -8   4   5 6.95980 18.7363   2 
   8   4  -5 -15.620 12.0212   1 
  -8   4   5 2.37983 9.04539   3 
   8   4  -5 -1.3503 6.36318   3 
  -6  -4   5 -9.7536 16.9321   2 
   6  -4  -5 30.0243 19.2977   1 
  -6   4   5 6.88821 12.7529   2 
  -6   4   5 -3.6486 9.30685   3 
   6   4  -5 -8.4657 9.41771   1 
   6   4  -5 8.66309 7.08803   3 
  -4  -4   5 -15.512 17.3901   2 
   4  -4  -5 -8.2127 14.3217   1 
  -4   4   5 -3.1521 9.48861   2 
   4   4  -5 0.62947 7.72439   1 
   4   4  -5 4.75928 5.97445   3 
  -4   4   5 10.9678 9.52597   3 
  -2  -4   5 623.081 45.3519   2 
   2  -4  -5 622.107 37.4211   1 
   2   4  -5 555.838 27.2389   1 
   2   4  -5 603.795 32.0246   3 
  -2   4   5 512.587 32.7194   3 
   0  -4   5 33.3162 20.4806   2 
   0  -4  -5 37.8049 7.64409   2 
   0  -4  -5 32.3926 13.0167   1 
   0   4  -5 28.7012 9.38662   3 
   0   4   5 30.2608 10.6434   3 
  -2  -4  -5 945.534 50.2359   1 
  -2  -4  -5 963.355 44.3874   2 
   2  -4   5 900.729 56.0448   2 
   2  -4   5 907.851 41.6114   1 
  -2   4  -5 921.296 46.2589   3 
   2   4   5 982.314 48.2449   3 
   4  -4   5 118.673 14.5221   1 
  -4  -4  -5 136.990 17.5714   2 
  -4  -4  -5 125.533 20.8134   1 
  -4   4  -5 139.314 23.8676   2 
  -4   4  -5 144.328 16.8661   3 
   4   4   5 133.652 17.4968   3 
  -6  -4  -5 91.5712 20.2208   2 
  -6  -4  -5 71.7123 18.3610   1 
   6  -4   5 74.2955 16.6634   1 
  -6   4  -5 45.6535 13.9523   3 
   6   4   5 77.9880 14.8533   3 
  -6   4  -5 75.9299 22.2989   2 
  -8  -4  -5 40.6785 19.1820   2 
   8  -4   5 0.11584 13.1948   1 
  -8  -4  -5 13.0882 15.8694   1 
  -8   4  -5 4.13843 20.1758   2 
  -8   4  -5 -4.3473 11.0802   3 
   8   4   5 15.2835 11.0008   3 
  10  -4   5 48.4032 21.4551   1 
 -10  -4  -5 60.0405 24.0360   2 
  10   4   5 35.9160 20.0961   1 
 -10   4  -5 44.4557 24.3424   2 
 -12  -4  -5 -39.012 19.2195   2 
  12  -4   5 13.1336 21.4079   1 
 -12   4  -5 -17.059 27.0327   2 
  12   4   5 4.24683 16.3179   1 
  13  -5  -5 15.4484 32.2731   1 
 -13  -5   5 79.4856 29.4047   2 
  13   5  -5 34.4680 25.2441   1 
 -13   5   5 60.3719 31.6583   2 
  11  -5  -5 -19.014 24.9327   1 
 -11  -5   5 38.1378 23.2124   2 
  11   5  -5 34.7209 18.8752   1 
 -11   5   5 3.02110 23.1484   2 
   9  -5  -5 108.561 29.0297   1 
  -9  -5   5 132.501 30.9807   2 
  -9   5   5 146.235 29.3923   2 
   9   5  -5 116.783 23.6998   1 
  -9   5   5 124.403 18.0372   3 
   7  -5  -5 345.984 38.4336   1 
  -7  -5   5 315.089 37.5705   2 
   7   5  -5 398.865 29.2680   1 
  -7   5   5 341.447 32.7740   2 
  -7   5   5 326.018 26.1840   3 
   7   5  -5 339.102 22.6878   3 
  -5  -5   5 290.486 37.4175   2 
   5  -5  -5 276.019 33.1663   1 
  -5   5   5 256.414 22.1784   3 
  -5   5   5 299.813 25.4885   2 
   5   5  -5 280.245 20.6944   3 
   5   5  -5 289.610 22.1749   1 
   3  -5  -5 1402.33 68.9564   1 
  -3  -5   5 1229.85 74.3191   2 
   3   5  -5 1378.22 58.8888   1 
   3   5  -5 1380.04 63.1976   3 
  -3   5   5 1359.31 61.7064   2 
  -3   5   5 1417.09 65.2539   3 
   1  -5  -5 166.097 18.6470   2 
  -1  -5   5 196.282 33.6987   2 
   1  -5  -5 197.950 24.4583   1 
   1   5  -5 179.875 17.8673   3 
  -1   5   5 166.791 18.8303   3 
   1  -5   5 -10.149 18.7492   2 
  -1  -5  -5 -6.7369 10.4633   1 
  -1  -5  -5 29.4823 9.42542   2 
   1   5   5 2.88108 9.39815   3 
  -1   5  -5 7.41528 8.49619   3 
   3  -5   5 1624.12 92.2329   2 
   3  -5   5 1676.22 73.6721   1 
  -3  -5  -5 1818.05 83.9663   1 
  -3  -5  -5 1874.41 79.7013   2 
  -3   5  -5 1701.47 79.3828   3 
   3   5   5 1803.44 80.9051   3 
   5  -5   5 121.259 17.8593   1 
  -5  -5  -5 130.879 21.8384   1 
  -5  -5  -5 127.396 22.3289   2 
   5   5   5 100.953 17.5017   3 
  -5   5  -5 100.157 17.3633   3 
  -5   5  -5 141.091 27.2670   2 
   7  -5   5 -14.514 10.8591   1 
  -7  -5  -5 0.34677 14.6086   1 
  -7  -5  -5 45.0101 18.1045   2 
   7   5   5 9.90598 11.9719   3 
  -7   5  -5 22.7168 12.4220   3 
  -7   5  -5 9.91143 20.5837   2 
   9  -5   5 247.639 33.7717   1 
  -9  -5  -5 247.758 36.9722   2 
  -9   5  -5 210.725 39.5505   2 
   9   5   5 198.480 33.5650   1 
  11  -5   5 5.63125 20.1532   1 
 -11  -5  -5 -4.4812 21.2361   2 
 -11   5  -5 -40.328 19.8628   2 
  11   5   5 15.2636 20.1808   1 
  12  -6  -5 -19.219 29.7172   1 
 -12  -6   5 -12.773 18.5018   2 
 -12   6   5 -12.763 26.4945   2 
  12   6  -5 -21.676 17.5476   1 
 -10  -6   5 22.1714 21.4230   2 
  10  -6  -5 -5.4798 26.9359   1 
 -10   6   5 -28.079 19.7265   2 
  10   6  -5 -11.031 16.3655   1 
  -8  -6   5 307.900 43.9437   2 
   8  -6  -5 297.584 40.3404   1 
  -8   6   5 318.785 34.6330   2 
   8   6  -5 302.605 22.5274   3 
   8   6  -5 361.242 31.0819   1 
  -8   6   5 298.118 26.2181   3 
   6  -6  -5 643.097 49.3259   1 
  -6  -6   5 497.149 48.3462   2 
  -6   6   5 570.879 37.4977   3 
   6   6  -5 609.311 34.5776   3 
   6   6  -5 610.759 36.7213   1 
  -6   6   5 639.417 42.3228   2 
   4  -6  -5 183.682 29.8072   1 
  -4  -6   5 147.603 33.8453   2 
  -4   6   5 196.753 20.8300   3 
  -4   6   5 157.173 22.6095   2 
   4   6  -5 182.463 16.7221   1 
   4   6  -5 154.905 17.5008   3 
   2  -6  -5 328.051 26.4265   2 
   2  -6  -5 296.932 29.2852   1 
  -2  -6   5 272.227 40.5931   2 
   2   6  -5 323.824 25.0460   3 
  -2   6   5 330.386 27.7465   3 
   0  -6   5 36.9208 26.3580   2 
   0  -6  -5 5.37952 13.3759   1 
   0  -6  -5 16.7121 12.7855   2 
   0   6   5 -6.7835 10.7901   3 
   0   6  -5 0.75258 7.28942   3 
  -2  -6  -5 77.0714 18.9249   1 
   2  -6   5 88.2760 28.9096   2 
  -2  -6  -5 108.773 16.0980   2 
   2   6   5 82.9983 17.1455   3 
  -2   6  -5 71.8498 14.6038   3 
  -4  -6  -5 0.95756 13.7097   1 
   4  -6   5 3.11494 9.75386   1 
   4  -6   5 10.7581 26.6380   2 
  -4  -6  -5 -7.4490 11.8445   2 
   4   6   5 10.5961 12.7012   3 
  -4   6  -5 14.6093 12.5993   3 
  -6  -6  -5 138.682 24.9396   2 
  -6  -6  -5 105.731 22.9945   1 
   6  -6   5 103.277 19.1498   1 
  -6   6  -5 113.003 29.6350   2 
   6   6   5 115.373 19.8370   3 
  -6   6  -5 92.2867 18.5202   3 
   8  -6   5 45.1378 19.9841   1 
  -8  -6  -5 91.8429 25.3345   2 
  -8  -6  -5 59.8560 20.9972   1 
   8   6   5 76.2611 17.1467   3 
  -8   6  -5 122.349 19.1735   3 
  -8   6  -5 75.7564 30.2789   2 
 -10  -6  -5 84.1949 27.4962   2 
  10  -6   5 16.1167 20.2909   1 
  10   6   5 42.5030 22.2971   1 
 -10   6  -5 30.4701 30.1021   2 
 -11  -7   5 19.3571 22.6101   2 
  11  -7  -5 -41.331 29.1083   1 
 -11   7   5 -36.232 24.3162   2 
  11   7  -5 19.3424 19.9419   1 
   9  -7  -5 -0.8069 29.8801   1 
  -9  -7   5 75.9525 28.2037   2 
   9   7  -5 55.7362 20.1165   1 
  -9   7   5 22.8567 15.7112   3 
  -9   7   5 48.0318 25.7463   2 
   7  -7  -5 509.402 48.7577   1 
  -7  -7   5 377.036 46.2594   2 
  -7   7   5 502.677 36.8661   3 
  -7   7   5 538.469 43.0731   2 
   7   7  -5 548.452 36.9629   1 
   7   7  -5 492.592 32.2276   3 
  -5  -7   5 0.16518 25.7410   2 
   5  -7  -5 -8.9750 25.8345   1 
  -5   7   5 -7.3221 18.8465   2 
   5   7  -5 12.4239 10.2147   1 
   5   7  -5 6.30472 9.95658   3 
  -5   7   5 -5.9878 13.1232   3 
  -3  -7   5 365.245 47.7391   2 
   3  -7  -5 377.093 33.8515   2 
   3  -7  -5 446.089 37.4558   1 
  -3   7   5 414.283 33.1254   3 
   3   7  -5 429.371 23.5195   1 
   3   7  -5 511.227 31.9155   3 
  -1  -7   5 -9.3506 28.2882   2 
   1  -7  -5 18.3430 16.6006   1 
   1  -7  -5 -10.255 17.2142   2 
  -1   7   5 -9.1208 11.3717   3 
   1   7  -5 4.09052 10.4861   3 
  -1  -7  -5 44.5104 17.3503   1 
  -1  -7  -5 45.1129 16.1531   2 
   1  -7   5 48.8287 30.2359   2 
  -1   7  -5 23.1249 11.6870   3 
   1   7   5 31.3848 15.1628   3 
  -3  -7  -5 208.102 28.4304   1 
   3  -7   5 128.835 36.1102   2 
  -3  -7  -5 197.012 26.6847   2 
  -3   7  -5 175.423 22.8114   3 
   3   7   5 169.395 24.2478   3 
   5  -7   5 2.63049 27.8006   2 
  -5  -7  -5 29.7865 17.7910   2 
   5  -7   5 -6.4181 12.8583   1 
  -5  -7  -5 38.8586 16.9163   1 
  -5   7  -5 28.9974 15.3027   3 
   5   7   5 15.7425 13.7904   3 
  -7  -7  -5 61.0746 21.1887   2 
  -7  -7  -5 44.1133 20.1996   1 
   7  -7   5 41.0587 18.5062   1 
  -7   7  -5 56.5824 26.5812   2 
   7   7   5 39.5728 15.2649   3 
  -7   7  -5 51.0550 17.0425   3 
  -9  -7  -5 279.219 40.3940   2 
   9  -7   5 269.983 44.2050   1 
   9   7   5 249.295 39.0421   1 
  -9   7  -5 171.641 38.1029   3 
  -9   7  -5 189.942 41.3049   2 
 -11  -7  -5 41.3116 25.9479   2 
 -11   7  -5 7.67615 32.0840   2 
  11   7   5 14.6324 20.1355   1 
 -12  -8   5 92.4353 33.2910   2 
  12  -8  -5 -11.906 37.3299   1 
  12   8  -5 32.0204 24.6544   1 
 -12   8   5 3.01781 31.0082   2 
  10  -8  -5 -32.348 29.7495   1 
 -10  -8   5 18.2271 26.1266   2 
 -10   8   5 -19.056 25.8008   2 
  10   8  -5 -33.799 13.3401   1 
  -8  -8   5 -5.8720 21.0753   2 
   8  -8  -5 -12.991 29.0172   1 
  -8   8   5 -8.2705 25.1356   2 
   8   8  -5 -22.859 12.9429   1 
   8   8  -5 -1.7434 9.20544   3 
  -8   8   5 -6.7391 16.2183   3 
   6  -8  -5 8.43312 26.3256   1 
  -6  -8   5 40.7455 29.6448   2 
  -6   8   5 3.07032 22.6023   2 
   6   8  -5 1.56767 10.4718   3 
  -6   8   5 17.7016 17.0062   3 
   6   8  -5 -10.270 11.0993   1 
  -4  -8   5 30.4094 34.1381   2 
   4  -8  -5 18.7418 23.4906   1 
   4  -8  -5 34.8766 22.1456   2 
  -4   8   5 35.7752 17.0830   3 
   4   8  -5 30.6000 10.4594   1 
   4   8  -5 36.5739 14.2423   3 
  -2  -8   5 138.282 42.8016   2 
   2  -8  -5 168.710 27.9114   1 
   2  -8  -5 113.822 27.8061   2 
   2   8  -5 111.789 20.3602   3 
  -2   8   5 146.169 23.9001   3 
   0  -8  -5 79.2950 21.3168   1 
   0  -8   5 98.2226 39.3054   2 
   0  -8  -5 106.504 25.1100   2 
   0   8  -5 86.6435 18.1654   3 
   0   8   5 77.4598 20.3514   3 
  -2  -8  -5 287.646 31.1081   1 
   2  -8   5 305.255 50.1876   2 
  -2  -8  -5 281.748 30.2561   2 
  -2   8  -5 339.372 30.6967   3 
   2   8   5 318.560 32.1589   3 
  -4  -8  -5 133.671 23.7585   2 
   4  -8   5 62.9264 34.4009   2 
  -4  -8  -5 90.4435 22.9287   1 
  -4   8  -5 129.536 22.8353   3 
   4   8   5 99.4782 21.9918   3 
  -6  -8  -5 126.505 26.8117   2 
  -6  -8  -5 123.062 25.6279   1 
   6  -8   5 65.8132 34.3600   2 
   6   8   5 98.6845 20.8993   3 
  -6   8  -5 111.162 22.9040   3 
  -8  -8  -5 86.7635 26.0170   2 
  -8  -8  -5 58.1149 22.9143   1 
  -8   8  -5 69.3623 32.1030   2 
  -8   8  -5 102.481 20.2673   3 
   8   8   5 77.5042 19.8682   3 
 -10  -8  -5 53.1211 25.4762   2 
  10   8   5 45.4211 23.7756   1 
 -10   8  -5 11.4264 30.6339   2 
 -11  -9   5 38.8599 29.2730   2 
  11  -9  -5 -29.360 37.4165   1 
 -11   9   5 -28.930 31.4915   2 
  11   9  -5 1.37995 19.3093   1 
  -9  -9   5 73.8613 33.1930   2 
   9  -9  -5 -30.954 32.0741   1 
  -9   9   5 -2.5404 15.4941   3 
   9   9  -5 29.1064 19.2906   1 
  -9   9   5 -4.8033 29.1423   2 
  -7  -9   5 42.9883 29.5759   2 
   7  -9  -5 39.5871 30.5944   1 
   7   9  -5 19.2741 13.5448   3 
  -7   9   5 20.1679 20.7318   3 
   7   9  -5 21.6452 14.8470   1 
   5  -9  -5 101.571 29.2876   1 
  -5  -9   5 67.3801 33.9489   2 
   5  -9  -5 95.2073 29.8927   2 
  -5   9   5 88.1460 21.3747   3 
   5   9  -5 112.749 20.2990   3 
   3  -9  -5 160.372 32.2567   2 
   3  -9  -5 158.460 29.6102   1 
  -3  -9   5 165.312 42.9920   2 
  -3   9   5 168.236 26.9514   3 
   3   9  -5 216.685 25.3132   3 
  -1  -9   5 -4.6176 35.3296   2 
   1  -9  -5 11.2987 19.2671   1 
   1  -9  -5 3.70755 23.9900   2 
   1   9  -5 15.0319 14.6614   3 
  -1   9   5 -0.1122 16.0066   3 
  -1  -9  -5 -4.3344 17.5296   2 
  -1  -9  -5 -2.3148 16.2296   1 
   1  -9   5 30.6929 36.3050   2 
  -1   9  -5 8.08888 13.5906   3 
   1   9   5 14.9888 16.4950   3 
   3  -9   5 238.810 47.1998   2 
  -3  -9  -5 330.079 31.7230   2 
  -3  -9  -5 231.159 32.2138   1 
  -3   9  -5 281.006 31.5816   3 
   3   9   5 302.172 32.3698   3 
  -5  -9  -5 -8.3380 16.0510   1 
  -5  -9  -5 -17.315 13.6388   2 
   5  -9   5 -13.448 28.9753   2 
  -5   9  -5 12.5015 17.4260   3 
   5   9   5 -15.757 13.3316   3 
  -7  -9  -5 -4.4289 16.7342   1 
   7  -9   5 -0.1054 32.7567   2 
  -7  -9  -5 23.1632 21.1383   2 
  -7   9  -5 9.94607 18.6477   3 
   7   9   5 14.6638 17.0421   3 
  -9  -9  -5 74.1999 27.6873   2 
   9  -9   5 149.683 42.8888   2 
   9   9   5 93.5214 27.0196   1 
  -9   9  -5 63.3216 27.6049   3 
 -10 -10   5 75.9287 32.9146   2 
  10 -10  -5 -25.811 36.1313   1 
 -10  10   5 -19.242 31.8452   2 
   8 -10  -5 131.491 33.3299   2 
   8 -10  -5 40.7812 33.0452   1 
  -8 -10   5 39.7461 31.2369   2 
  -8  10   5 18.2926 22.9297   3 
   8  10  -5 10.6212 14.2527   3 
   6 -10  -5 79.1716 30.7237   2 
  -6 -10   5 43.5125 31.7341   2 
   6 -10  -5 13.8931 27.0086   1 
   6  10  -5 9.50822 15.2646   3 
  -6  10   5 69.0540 24.5308   3 
   4 -10  -5 42.0383 22.7359   1 
  -4 -10   5 41.6513 35.6802   2 
   4 -10  -5 -22.607 25.7732   2 
  -4  10   5 34.0132 22.5351   3 
   4  10  -5 34.3421 15.7683   3 
   2 -10  -5 92.6294 24.4271   1 
  -2 -10   5 47.3043 41.6139   2 
   2 -10  -5 66.8411 29.0273   2 
   2  10  -5 53.4584 19.1495   3 
  -2  10   5 82.2141 23.6788   3 
   0 -10  -5 36.1160 24.2900   2 
   0 -10   5 23.6724 39.6710   2 
   0 -10  -5 17.7172 18.8220   1 
   0  10  -5 14.5468 16.7772   3 
   0  10   5 2.85198 17.3142   3 
  -2 -10  -5 21.7538 17.3022   1 
   2 -10   5 -31.070 34.8672   2 
  -2 -10  -5 38.5550 19.7110   2 
  -2  10  -5 23.8695 17.4462   3 
   2  10   5 23.8046 19.1693   3 
  -4 -10  -5 58.2942 22.7731   2 
   4 -10   5 34.9728 37.1087   2 
  -4 -10  -5 11.6008 18.8181   1 
  -4  10  -5 22.9115 18.8890   3 
   4  10   5 10.9674 17.5781   3 
  -6 -10  -5 26.8854 20.1242   2 
   6 -10   5 5.26472 35.2394   2 
  -6 -10  -5 -1.4949 17.8042   1 
   6  10   5 2.78388 17.3461   3 
  -6  10  -5 38.0603 21.6523   3 
  -8 -10  -5 7.42364 20.1220   1 
   8 -10   5 15.6866 36.5487   2 
  -8  10  -5 25.0517 19.7747   3 
   9 -11  -5 147.622 38.9770   2 
   9 -11  -5 63.3014 38.5535   1 
  -9 -11   5 31.3196 30.2014   2 
  -9  11   5 45.6858 25.2312   3 
   7 -11  -5 155.713 36.8111   1 
   7 -11  -5 31.5773 32.9377   2 
  -7 -11   5 62.7234 37.5487   2 
   7  11  -5 45.0473 18.7080   3 
  -7  11   5 60.0998 27.4162   3 
  -5 -11   5 -17.937 28.8345   2 
   5 -11  -5 7.76390 30.2270   2 
   5 -11  -5 36.7455 25.1682   1 
  -5  11   5 -27.020 16.5125   3 
   5  11  -5 15.8620 14.8550   3 
  -3 -11   5 93.3349 42.1614   2 
   3 -11  -5 99.3545 26.5007   1 
   3 -11  -5 23.1027 32.1034   2 
  -3  11   5 91.1190 26.5139   3 
   3  11  -5 138.487 26.5521   3 
   1 -11  -5 28.4338 28.6872   2 
   1 -11  -5 54.6608 21.5544   1 
  -1 -11   5 23.5994 40.4700   2 
  -1  11   5 46.5615 23.0287   3 
   1  11  -5 0.93992 17.6911   3 
  -1 -11  -5 17.7775 18.2256   1 
   1 -11   5 -22.781 39.3854   2 
  -1  11  -5 -5.4548 18.1352   3 
   1  11   5 15.4432 20.6577   3 
  -3 -11  -5 70.8956 24.3742   1 
   3 -11   5 51.5456 44.0038   2 
   3  11   5 60.6075 24.2509   3 
  -3  11  -5 104.698 26.8394   3 
  -5 -11  -5 -1.7102 18.0783   1 
   5 -11   5 -33.219 37.4518   2 
  -5  11  -5 3.19214 21.1961   3 
   5  11   5 -7.6925 17.5844   3 
   7 -11   5 -16.935 37.5344   2 
  -7 -11  -5 47.5896 26.1602   1 
  -7  11  -5 55.2263 24.5828   3 
   7  11   5 12.9379 20.4794   3 
  -8 -12   5 37.4622 34.1643   2 
   8  12  -5 24.5210 18.5960   3 
  -8  12   5 68.4527 27.2222   3 
  -6 -12   5 6.16015 33.1840   2 
  -6  12   5 37.6506 24.6946   3 
   6  12  -5 31.5390 19.0160   3 
   4 -12  -5 35.8003 22.9347   1 
  -4 -12   5 52.2970 38.5327   2 
  -4  12   5 22.0108 21.8830   3 
   4  12  -5 6.54105 17.9831   3 
   2 -12  -5 83.1566 25.1305   1 
  -2 -12   5 50.9775 45.1853   2 
  -2  12   5 25.2024 24.8124   3 
   2  12  -5 67.0233 24.0281   3 
   0 -12   5 -11.443 42.9038   2 
   0 -12  -5 30.2207 21.7990   1 
   0  12   5 4.55193 20.9198   3 
   0  12  -5 26.1778 21.4855   3 
  -2 -12  -5 44.6460 23.3520   1 
   2 -12   5 -15.133 41.5333   2 
   2  12   5 1.69411 20.8439   3 
  -2  12  -5 40.9662 22.6324   3 
  -4 -12  -5 44.8163 22.4349   1 
   4 -12   5 5.51725 45.3132   2 
   4  12   5 12.3399 20.9505   3 
  -4  12  -5 77.0746 26.8143   3 
  -6 -12  -5 14.9318 21.8891   1 
   6 -12   5 26.7222 48.3695   2 
   6  12   5 -18.104 19.3494   3 
  -6  12  -5 32.5521 26.7785   3 
  -5 -13   5 70.9938 38.5554   2 
   5  13  -5 25.6286 19.3119   3 
  -5  13   5 37.2969 24.0461   3 
  -3 -13   5 60.7090 44.1690   2 
   3  13  -5 19.8904 21.1016   3 
  -3  13   5 38.0596 27.0048   3 
  -1 -13   5 4.67810 46.3772   2 
   1  13  -5 25.3998 24.4438   3 
  -1  13   5 -2.4563 19.8182   3 
   1 -13   5 -63.575 42.6047   2 
  -1  13  -5 11.0425 23.4102   3 
   1  13   5 -9.3462 20.3864   3 
   3 -13   5 11.9675 55.0112   2 
  -3 -13  -5 116.814 28.7412   1 
  -3  13  -5 83.5526 29.1253   3 
   3  13   5 32.6099 23.9369   3 
  -2 -14   5 54.4636 48.6093   2 
  -2  14   5 22.9089 25.6689   3 
   2  14  -5 71.9714 26.8867   3 
   0 -14   5 -33.983 50.3568   2 
   0  14  -5 32.3094 25.0663   3 
   0  14   5 -17.708 23.2427   3 
  14   0  -6 36.0821 28.3028   1 
 -14   0   6 77.3709 30.8961   2 
  12   0  -6 306.597 41.1464   1 
 -12   0   6 339.447 40.3905   2 
  10   0  -6 132.915 26.4841   1 
 -10   0   6 193.965 33.6371   2 
  -8   0   6 235.656 33.1844   2 
  -8   0   6 184.995 14.4276   3 
   8   0  -6 236.171 26.9658   1 
  -6   0   6 113.921 13.4540   3 
  -6   0   6 142.620 23.0830   2 
   6   0  -6 154.292 21.2877   1 
   4   0  -6 385.782 26.5976   1 
  -4   0   6 318.597 25.4947   2 
  -2   0   6 576.522 30.7740   2 
   2   0  -6 541.774 31.9626   1 
   2   0  -6 561.017 29.9522   3 
   0   0  -6 691.916 35.1343   3 
   0   0  -6 674.176 35.7356   1 
   0   0   6 695.037 34.9323   2 
  -2   0  -6 639.154 32.0750   3 
  -2   0  -6 520.558 33.0149   1 
  -2   0  -6 534.900 31.0822   2 
  -4   0  -6 5056.85 207.589   2 
  -4   0  -6 5075.36 207.074   1 
  -4   0  -6 5104.46 203.355   3 
  -6   0  -6 16.3909 12.3837   1 
  -6   0  -6 0.74932 11.4148   2 
   6   0   6 11.6492 10.3018   3 
  -8   0  -6 -14.888 13.3060   2 
   8   0   6 18.1322 14.1203   1 
   8   0   6 4.77120 11.0868   3 
 -10   0  -6 19.9708 21.0739   2 
  10   0   6 -14.787 13.2435   1 
  12   0   6 36.6490 22.5214   1 
 -12   0  -6 -0.3474 23.0923   2 
  13  -1  -6 112.583 31.1337   1 
 -13  -1   6 217.819 38.0850   2 
  13   1  -6 131.868 31.5660   1 
 -13   1   6 169.085 36.2958   2 
  11  -1  -6 -2.2322 20.1344   1 
 -11  -1   6 -13.005 17.0049   2 
  11   1  -6 4.91503 18.5699   1 
 -11   1   6 0.46264 18.7449   2 
  -9  -1   6 837.943 55.8738   2 
   9  -1  -6 691.122 50.4197   1 
  -9   1   6 821.693 54.6704   2 
   9   1  -6 790.219 50.8246   1 
  -7  -1   6 76.5115 11.4821   3 
  -7  -1   6 83.8181 21.1701   2 
   7  -1  -6 75.6764 19.3464   1 
   7   1  -6 115.336 20.5599   1 
  -7   1   6 82.9962 12.1848   3 
  -7   1   6 121.203 23.2096   2 
  -5  -1   6 28.2255 15.3780   2 
   5  -1  -6 55.5804 16.5688   1 
   5   1  -6 50.9168 14.5278   1 
  -5   1   6 47.3522 11.1490   3 
  -5   1   6 60.1548 14.8685   2 
   5   1  -6 46.2196 8.95850   3 
   3  -1  -6 904.018 45.2156   1 
  -3  -1   6 945.936 46.3849   2 
  -3   1   6 793.738 42.3557   3 
  -3   1   6 744.624 40.6313   2 
   3   1  -6 890.003 40.8827   3 
   3   1  -6 904.021 43.1567   1 
   1  -1  -6 170.403 18.3325   1 
  -1  -1   6 202.324 22.5952   2 
   1  -1  -6 203.457 12.8946   2 
   1   1  -6 182.320 15.4741   3 
  -1   1   6 194.297 13.7332   2 
   1   1  -6 171.558 16.1550   1 
  -1   1   6 188.517 18.3228   3 
  -1  -1  -6 92.1617 14.6728   1 
  -1  -1  -6 72.2747 8.87090   2 
   1  -1   6 76.4561 16.0760   2 
  -1   1  -6 76.8333 12.1512   1 
  -1   1  -6 73.8667 11.7355   3 
   1   1   6 56.0615 12.2157   3 
  -3  -1  -6 1439.13 65.8765   1 
  -3  -1  -6 1396.79 62.5750   2 
   3   1   6 1366.97 64.5442   3 
  -3   1  -6 1255.28 61.3589   3 
  -3   1  -6 1363.12 64.6532   2 
  -3   1  -6 1390.06 63.6257   1 
  -5  -1  -6 356.846 28.4491   2 
  -5  -1  -6 366.687 28.9623   1 
   5   1   6 342.224 25.6197   3 
  -5   1  -6 370.685 28.2069   1 
  -5   1  -6 353.514 30.0064   2 
  -5   1  -6 419.942 25.8369   3 
  -7  -1  -6 240.562 28.4327   2 
  -7  -1  -6 233.015 29.1597   1 
   7  -1   6 197.078 24.4080   1 
  -7   1  -6 264.111 35.2255   2 
   7   1   6 249.391 21.6501   3 
  -7   1  -6 203.561 19.6993   3 
  -9  -1  -6 245.076 37.4095   2 
   9  -1   6 219.260 34.1192   1 
   9   1   6 274.922 37.3817   1 
  -9   1  -6 272.355 38.4658   2 
  11  -1   6 16.6968 19.0275   1 
 -11  -1  -6 15.1120 19.9553   2 
 -11   1  -6 44.2464 26.9419   2 
  11   1   6 21.4751 18.7047   1 
  14  -2  -6 -13.665 27.8447   1 
 -14  -2   6 19.9940 26.1022   2 
 -14   2   6 43.5976 28.0192   2 
  14   2  -6 -4.6699 21.4515   1 
  12  -2  -6 -26.403 22.6801   1 
 -12  -2   6 -20.563 14.9556   2 
 -12   2   6 -25.814 17.4920   2 
  12   2  -6 28.6563 21.3107   1 
  10  -2  -6 172.293 30.3872   1 
 -10  -2   6 216.667 33.2643   2 
  10   2  -6 232.186 31.5615   1 
 -10   2   6 244.947 36.3251   2 
   8  -2  -6 174.673 27.7493   1 
  -8  -2   6 222.155 33.0974   2 
  -8   2   6 194.253 29.5838   2 
  -8   2   6 147.985 15.3780   3 
   8   2  -6 209.045 25.0723   1 
   6  -2  -6 1006.88 56.8201   1 
  -6  -2   6 1101.73 60.5750   2 
  -6   2   6 1002.21 48.6883   3 
  -6   2   6 1026.77 55.6092   2 
   6   2  -6 1093.30 48.0932   3 
   6   2  -6 1124.80 55.0968   1 
  -4  -2   6 343.550 29.4568   2 
   4  -2  -6 318.850 28.1519   1 
   4   2  -6 295.218 19.7362   3 
   4   2  -6 329.518 23.2882   1 
  -4   2   6 311.177 21.9603   3 
  -4   2   6 286.108 21.5882   2 
   2  -2  -6 689.977 31.5053   2 
  -2  -2   6 714.906 43.4871   2 
   2  -2  -6 736.311 40.0746   1 
  -2   2   6 709.686 37.2172   3 
   2   2  -6 674.656 34.9436   3 
  -2   2   6 667.387 30.6561   2 
   2   2  -6 711.654 35.3101   1 
   0  -2  -6 994.633 49.8606   1 
   0  -2   6 1021.82 52.9679   2 
   0   2  -6 906.340 46.2640   3 
   0   2  -6 970.212 44.6149   1 
   0   2   6 1061.41 49.6815   3 
  -2  -2  -6 438.531 29.4130   1 
  -2  -2  -6 405.293 22.1589   2 
   2   2   6 422.360 27.6574   3 
  -2   2  -6 406.056 28.0400   2 
  -2   2  -6 370.177 23.5185   1 
  -2   2  -6 387.632 25.0425   3 
  -4  -2  -6 195.375 19.4034   2 
  -4  -2  -6 191.033 20.9262   1 
  -4   2  -6 205.290 22.7441   2 
   4   2   6 210.358 19.6243   3 
  -4   2  -6 202.151 18.5364   3 
  -4   2  -6 187.303 18.8591   1 
  -6  -2  -6 -8.5996 11.3870   1 
  -6  -2  -6 6.45977 12.7873   2 
   6  -2   6 16.2097 11.8260   1 
  -6   2  -6 11.6927 14.3319   2 
   6   2   6 13.8744 10.3499   3 
  -6   2  -6 41.1512 11.9419   3 
  -8  -2  -6 970.448 58.6233   2 
   8  -2   6 901.672 55.4390   1 
  -8   2  -6 813.942 58.7775   2 
  -8   2  -6 855.736 45.5128   3 
   8   2   6 851.424 55.7197   1 
   8   2   6 883.868 45.9430   3 
 -10  -2  -6 183.676 34.5975   2 
  10  -2   6 162.596 30.6471   1 
 -10   2  -6 166.481 36.4545   2 
  10   2   6 156.173 30.7223   1 
 -12  -2  -6 4.87870 21.2619   2 
  12  -2   6 5.85550 19.0046   1 
  12   2   6 -6.8991 16.3741   1 
 -12   2  -6 -2.1968 25.2987   2 
  13  -3  -6 34.8555 29.3868   1 
 -13  -3   6 102.080 31.4556   2 
 -13   3   6 151.413 34.7456   2 
  13   3  -6 98.2050 28.7343   1 
 -11  -3   6 106.086 26.9954   2 
  11  -3  -6 81.6768 28.1345   1 
  11   3  -6 125.095 27.6218   1 
 -11   3   6 106.369 29.1844   2 
   9  -3  -6 76.8782 25.7340   1 
  -9  -3   6 97.5196 25.6308   2 
  -9   3   6 60.4935 12.6984   3 
   9   3  -6 92.2644 20.8498   1 
  -9   3   6 65.0000 22.2116   2 
  -7  -3   6 -5.4093 17.7325   2 
   7  -3  -6 3.37887 18.6034   1 
  -7   3   6 16.6156 9.06863   3 
   7   3  -6 2.65862 6.75327   3 
  -7   3   6 11.9891 13.8877   2 
   7   3  -6 -18.592 10.1076   1 
   5  -3  -6 144.404 24.2129   1 
  -5  -3   6 130.798 24.8524   2 
   5   3  -6 138.737 16.5413   1 
   5   3  -6 117.478 13.2858   3 
  -5   3   6 123.347 15.4903   3 
  -5   3   6 123.058 18.4341   2 
   3  -3  -6 876.727 47.5295   1 
  -3  -3   6 867.745 51.5389   2 
   3   3  -6 831.386 40.8498   3 
  -3   3   6 805.902 42.4325   3 
   3   3  -6 824.173 40.2616   1 
  -3   3   6 827.953 38.7375   2 
   1  -3  -6 105.461 17.7779   1 
  -1  -3   6 65.0843 22.8944   2 
   1   3  -6 75.7655 12.0938   3 
   1   3  -6 85.2460 10.5703   1 
  -1   3   6 85.4821 14.4792   3 
  -1  -3  -6 102.627 18.0345   1 
   1  -3   6 95.3780 22.0814   2 
   1   3   6 71.0039 13.3786   3 
  -1   3  -6 61.7552 9.40275   1 
  -1   3  -6 84.0897 12.7578   3 
  -3  -3  -6 2504.13 103.875   2 
  -3  -3  -6 2432.94 109.444   1 
  -3   3  -6 2461.81 105.053   3 
  -3   3  -6 2395.69 109.991   2 
  -3   3  -6 2460.03 103.259   1 
   3   3   6 2544.48 107.053   3 
   5  -3   6 13.0685 9.82815   1 
  -5  -3  -6 19.0134 12.2055   1 
  -5  -3  -6 13.0152 12.7836   2 
  -5   3  -6 -0.9755 9.03080   3 
  -5   3  -6 11.6252 15.5382   2 
   5   3   6 4.76350 9.55061   3 
  -7  -3  -6 558.981 41.8295   1 
   7  -3   6 563.159 39.9160   1 
  -7  -3  -6 538.763 40.9593   2 
   7   3   6 542.722 33.9136   3 
  -7   3  -6 556.683 44.7098   2 
  -7   3  -6 519.655 34.1225   3 
   9  -3   6 263.599 30.5879   1 
  -9  -3  -6 265.447 34.4035   2 
   9   3   6 274.308 37.6688   1 
  -9   3  -6 257.343 40.3250   2 
 -11  -3  -6 130.929 33.1400   2 
  11  -3   6 50.6883 23.5057   1 
 -11   3  -6 17.9234 24.2323   2 
  11   3   6 33.9323 20.4174   1 
 -14  -4   6 4.32180 26.1038   2 
 -14   4   6 26.3229 30.1886   2 
 -12  -4   6 146.535 32.5996   2 
  12  -4  -6 117.784 34.3526   1 
 -12   4   6 226.870 40.2269   2 
  12   4  -6 206.387 34.5454   1 
 -10  -4   6 133.982 29.5722   2 
  10  -4  -6 143.974 31.6995   1 
 -10   4   6 176.379 32.3059   2 
  10   4  -6 186.290 29.2443   1 
  -8  -4   6 486.539 44.7411   2 
   8  -4  -6 460.367 44.4385   1 
  -8   4   6 538.860 31.9422   3 
  -8   4   6 621.884 43.0032   2 
   8   4  -6 484.664 28.0254   3 
   8   4  -6 508.738 37.9013   1 
  -6  -4   6 76.8409 24.4333   2 
   6  -4  -6 94.6021 25.2280   1 
  -6   4   6 135.934 18.1003   3 
   6   4  -6 71.1151 11.5780   3 
  -6   4   6 118.277 20.2384   2 
   6   4  -6 122.039 18.5690   1 
  -4  -4   6 19.6205 21.0272   2 
   4  -4  -6 88.2948 21.1970   1 
   4   4  -6 58.7024 13.3693   1 
   4   4  -6 51.2815 10.4755   3 
  -4   4   6 69.9222 13.4794   2 
  -4   4   6 69.7921 13.5774   3 
   2  -4  -6 167.509 22.7921   1 
  -2  -4   6 182.592 30.9368   2 
   2  -4  -6 153.608 12.7454   2 
   2   4  -6 157.756 14.5464   1 
  -2   4   6 142.709 18.4116   3 
   2   4  -6 150.168 15.4999   3 
   0  -4   6 54.6247 22.7924   2 
   0  -4  -6 45.6723 14.2545   1 
   0  -4   6 18.9816 7.92401   1 
   0   4   6 38.5716 11.6279   3 
   0   4  -6 45.7733 10.8258   3 
  -2  -4  -6 8.93817 11.7525   1 
   2  -4   6 7.02551 18.3137   2 
  -2  -4  -6 -7.3805 5.15356   2 
   2   4   6 1.57743 9.72504   3 
  -2   4  -6 18.9500 9.35299   3 
  -4  -4  -6 1170.12 62.5205   1 
  -4  -4  -6 1202.95 57.6111   2 
   4  -4   6 1130.89 55.4282   1 
  -4   4  -6 1139.47 64.4682   2 
  -4   4  -6 1117.85 56.1973   3 
   4   4   6 1196.49 58.3554   3 
  -6  -4  -6 38.7562 15.8639   2 
   6  -4   6 38.6960 14.9501   1 
  -6  -4  -6 38.7846 16.3559   1 
   6   4   6 48.9825 13.8610   3 
  -6   4  -6 23.7792 13.6112   3 
  -6   4  -6 22.9813 20.4036   2 
  -8  -4  -6 62.0148 22.3249   2 
   8  -4   6 52.0453 18.4948   1 
  -8  -4  -6 32.1588 17.4360   1 
  -8   4  -6 60.7059 14.6008   3 
  -8   4  -6 41.6516 23.0864   2 
   8   4   6 37.4841 13.4544   3 
  10  -4   6 7.17957 17.8503   1 
 -10  -4  -6 -12.848 16.5961   2 
  10   4   6 -2.2406 13.6476   1 
 -10   4  -6 -6.8960 23.9527   2 
 -12  -4  -6 -34.191 20.3848   2 
  12  -4   6 32.0853 21.2802   1 
  12   4   6 23.2793 22.9201   1 
 -12   4  -6 24.1920 28.8145   2 
 -13  -5   6 60.6366 27.6073   2 
  13  -5  -6 -44.893 28.7020   1 
  13   5  -6 91.1401 28.7632   1 
 -13   5   6 68.8780 33.0530   2 
 -11  -5   6 21.0317 22.4467   2 
  11  -5  -6 -15.783 26.1644   1 
 -11   5   6 -33.967 19.8713   2 
  11   5  -6 -4.1796 16.2693   1 
  -9  -5   6 431.502 44.0652   2 
   9  -5  -6 381.071 44.8192   1 
   9   5  -6 498.542 38.8525   1 
  -9   5   6 471.343 31.4816   3 
  -9   5   6 436.489 40.3356   2 
  -7  -5   6 25.3467 22.9744   2 
   7  -5  -6 48.1386 27.2082   1 
  -7   5   6 56.2755 13.3522   3 
  -7   5   6 58.5843 20.3343   2 
   7   5  -6 47.1754 16.3384   1 
   7   5  -6 14.2520 9.53588   3 
  -5  -5   6 -6.0778 20.5859   2 
   5  -5  -6 -19.834 19.6866   1 
  -5   5   6 -2.7008 13.2882   2 
   5   5  -6 0.67773 7.40433   3 
  -5   5   6 -7.4962 10.5944   3 
   5   5  -6 14.7741 10.8106   1 
  -3  -5   6 238.664 35.6863   2 
   3  -5  -6 212.893 27.6201   1 
   3   5  -6 235.247 19.6264   3 
  -3   5   6 172.972 20.5350   3 
   3   5  -6 191.528 16.9405   1 
   1  -5  -6 75.4780 17.8714   1 
   1  -5  -6 72.7674 11.9857   2 
  -1  -5   6 52.0435 27.3996   2 
  -1   5   6 96.5518 15.9182   3 
   1   5  -6 55.3802 11.9712   3 
   1  -5   6 -8.9070 21.2039   2 
  -1  -5  -6 0.19054 11.6850   1 
  -1  -5  -6 29.1110 7.62905   2 
   1   5   6 8.32208 11.5038   3 
  -1   5  -6 -6.9259 7.51858   3 
  -3  -5  -6 1038.67 56.9801   1 
  -3  -5  -6 1023.47 50.2226   2 
   3  -5   6 1006.54 46.6564   1 
   3  -5   6 968.364 65.2818   2 
  -3   5  -6 986.376 52.2443   3 
   3   5   6 1049.75 53.9217   3 
  -5  -5  -6 11.0531 14.2115   1 
   5  -5   6 5.03544 9.61859   1 
  -5  -5  -6 8.98982 14.0301   2 
   5   5   6 15.0378 12.8768   3 
  -5   5  -6 50.7949 14.5308   3 
  -5   5  -6 1.46308 18.3734   2 
   7  -5   6 197.784 26.3288   1 
  -7  -5  -6 213.449 31.3094   2 
  -7  -5  -6 169.065 28.6387   1 
  -7   5  -6 179.200 35.1569   2 
   7   5   6 200.817 24.3215   3 
  -7   5  -6 182.719 22.5880   3 
  -9  -5  -6 212.655 35.1548   2 
   9  -5   6 147.379 27.7677   1 
   9   5   6 163.112 30.6742   1 
  -9   5  -6 141.854 33.9062   2 
  11  -5   6 -4.0164 19.4664   1 
 -11  -5  -6 39.2033 26.7995   2 
  11   5   6 -43.371 14.4944   1 
 -11   5  -6 22.4870 28.9654   2 
  12  -6  -6 23.6547 33.4678   1 
 -12  -6   6 1.46101 21.8710   2 
  12   6  -6 60.6831 24.8443   1 
 -12   6   6 15.1564 27.8184   2 
 -10  -6   6 45.1336 27.3121   2 
  10  -6  -6 -10.173 28.0448   1 
  10   6  -6 23.3553 20.0526   1 
 -10   6   6 26.0316 25.0607   2 
  -8  -6   6 40.1540 23.6937   2 
   8  -6  -6 40.7680 29.1860   1 
   8   6  -6 22.8094 17.5105   1 
  -8   6   6 39.1884 23.6844   2 
   8   6  -6 8.63643 9.54110   3 
  -8   6   6 15.7942 13.7453   3 
  -6  -6   6 63.3742 30.5690   2 
   6  -6  -6 106.867 31.2413   1 
   6   6  -6 120.020 19.3964   1 
   6   6  -6 98.9618 15.1911   3 
  -6   6   6 96.7766 22.2283   2 
  -6   6   6 96.0149 17.8471   3 
   4  -6  -6 71.8830 24.9577   1 
  -4  -6   6 31.1293 29.7899   2 
   4   6  -6 69.3453 13.4697   1 
   4   6  -6 71.6364 14.0447   3 
  -4   6   6 67.7157 16.4039   3 
  -4   6   6 103.098 18.9500   2 
  -2  -6   6 508.991 52.5363   2 
   2  -6  -6 606.800 34.4518   2 
   2  -6  -6 577.453 40.1861   1 
  -2   6   6 549.735 36.9063   3 
   2   6  -6 528.214 34.5117   3 
   0  -6   6 263.522 40.2808   2 
   0  -6  -6 223.726 18.7455   2 
   0  -6  -6 226.784 26.5767   1 
   0   6  -6 270.464 23.4938   3 
   0   6   6 245.352 24.2078   3 
   2  -6   6 10.5314 25.2089   2 
  -2  -6  -6 3.62450 9.61248   2 
  -2  -6  -6 25.8876 15.7075   1 
   2   6   6 6.03008 12.7868   3 
  -2   6  -6 17.3095 11.0604   3 
   4  -6   6 274.168 43.7992   2 
   4  -6   6 275.726 21.2165   1 
  -4  -6  -6 250.523 29.9388   1 
  -4  -6  -6 267.004 25.6435   2 
   4   6   6 278.457 27.2477   3 
  -4   6  -6 279.411 26.7718   3 
  -6  -6  -6 -9.7034 12.4965   2 
   6  -6   6 11.9219 13.0144   1 
  -6  -6  -6 7.72196 14.2185   1 
  -6   6  -6 0.87787 19.2334   2 
   6   6   6 12.7658 13.8116   3 
  -6   6  -6 23.4943 14.2224   3 
  -8  -6  -6 184.037 32.5488   2 
   8  -6   6 196.347 29.4885   1 
  -8  -6  -6 210.410 32.6852   1 
  -8   6  -6 157.123 36.3368   2 
   8   6   6 192.154 24.6503   3 
  -8   6  -6 177.432 23.9522   3 
 -10  -6  -6 89.4929 30.6015   2 
  10  -6   6 7.00258 20.1545   1 
  10   6   6 36.9186 21.7063   1 
 -10   6  -6 15.5310 28.8272   2 
  11  -7  -6 -62.179 29.4867   1 
 -11  -7   6 0.25443 22.8019   2 
  11   7  -6 36.7681 21.6529   1 
 -11   7   6 -0.7116 27.3430   2 
  -9  -7   6 87.9705 31.1487   2 
   9  -7  -6 91.3929 33.3541   1 
   9   7  -6 98.7815 23.3872   1 
  -9   7   6 84.9072 28.6627   2 
  -9   7   6 86.6846 18.5173   3 
   7  -7  -6 17.4242 28.8557   1 
  -7  -7   6 18.4606 25.5438   2 
   7   7  -6 25.3890 16.2171   1 
  -7   7   6 32.9033 18.3065   3 
   7   7  -6 12.2089 10.7354   3 
  -7   7   6 24.4050 22.6695   2 
   5  -7  -6 36.2966 27.6219   1 
  -5  -7   6 44.0585 29.9756   2 
  -5   7   6 38.9402 16.8623   3 
  -5   7   6 88.5643 23.1233   2 
   5   7  -6 40.1648 13.6789   1 
   5   7  -6 44.7115 13.3084   3 
  -3  -7   6 262.452 45.1076   2 
   3  -7  -6 278.340 33.0203   1 
   3  -7  -6 266.900 28.8185   2 
   3   7  -6 254.624 18.6278   1 
   3   7  -6 318.479 26.5230   3 
  -3   7   6 280.928 28.2928   3 
   1  -7  -6 24.7157 17.1943   1 
   1  -7  -6 12.3085 16.9144   2 
  -1  -7   6 38.9833 32.6019   2 
   1   7  -6 24.7516 11.9560   3 
  -1   7   6 35.2048 15.6532   3 
  -1  -7  -6 12.3710 13.1887   2 
  -1  -7  -6 0.74073 15.0217   1 
   1  -7   6 12.2558 30.7583   2 
  -1   7  -6 -9.3397 10.7864   3 
   1   7   6 1.41233 13.6719   3 
  -3  -7  -6 202.013 29.1586   1 
   3  -7   6 171.566 39.8985   2 
  -3  -7  -6 190.329 22.4279   2 
  -3   7  -6 157.662 23.4994   3 
   3   7   6 181.734 26.3613   3 
  -5  -7  -6 143.078 27.8182   1 
   5  -7   6 135.071 37.6464   2 
  -5  -7  -6 191.537 27.9202   2 
   5   7   6 123.896 22.8944   3 
  -5   7  -6 140.721 22.4194   3 
  -7  -7  -6 67.2962 22.8616   1 
  -7  -7  -6 18.7371 17.0493   2 
  -7   7  -6 5.71715 14.4284   3 
   7   7   6 65.7939 17.8095   3 
  -7   7  -6 34.7453 27.8090   2 
  -9  -7  -6 136.444 30.8826   2 
  -9   7  -6 41.7230 30.9029   2 
  12  -8  -6 -31.364 35.0448   1 
 -12  -8   6 39.3153 27.1945   2 
  12   8  -6 -15.375 20.6160   1 
 -12   8   6 -38.196 27.4791   2 
 -10  -8   6 66.2739 29.6392   2 
  10  -8  -6 -8.1520 32.4090   1 
 -10   8   6 -6.9864 27.0271   2 
  10   8  -6 -17.296 16.0535   1 
  -8  -8   6 33.3217 29.0823   2 
   8  -8  -6 22.8901 30.0272   1 
  -8   8   6 72.3476 21.8480   3 
   8   8  -6 66.6999 20.2836   1 
   8   8  -6 63.7325 14.9166   3 
  -8   8   6 41.5325 26.6089   2 
   6  -8  -6 20.8421 27.5307   1 
  -6  -8   6 17.7382 27.5455   2 
  -6   8   6 16.2045 23.8902   2 
  -6   8   6 32.9409 18.2861   3 
   6   8  -6 27.7598 12.5631   3 
   6   8  -6 -6.7009 11.4039   1 
  -4  -8   6 -28.589 29.7209   2 
   4  -8  -6 38.2060 24.6409   1 
   4  -8  -6 25.2879 21.3859   2 
  -4   8   6 18.4192 16.4581   3 
   4   8  -6 16.3643 12.9872   3 
   2  -8  -6 61.6374 22.7413   1 
   2  -8  -6 36.2038 23.5689   2 
  -2  -8   6 5.03911 37.6003   2 
  -2   8   6 77.7483 19.5046   3 
   2   8  -6 50.0778 15.5735   3 
   0  -8  -6 -8.8553 16.3388   1 
   0  -8   6 52.0257 36.6971   2 
   0  -8  -6 28.7173 18.3116   2 
   0   8   6 2.80720 15.4710   3 
   0   8  -6 36.8694 14.3808   3 
  -2  -8  -6 59.6628 16.8958   2 
  -2  -8  -6 50.4011 20.7365   1 
   2  -8   6 12.2775 33.1926   2 
  -2   8  -6 47.3885 17.5252   3 
   2   8   6 35.1873 19.0828   3 
  -4  -8  -6 360.818 31.9419   2 
  -4  -8  -6 298.254 35.2196   1 
   4  -8   6 245.362 48.2920   2 
   4   8   6 319.399 33.1569   3 
  -4   8  -6 305.389 30.8435   3 
  -6  -8  -6 8.53078 16.1221   1 
  -6  -8  -6 -8.2334 13.8260   2 
   6  -8   6 40.3284 29.9592   2 
   6   8   6 -9.1064 14.0547   3 
  -6   8  -6 4.39914 16.2555   3 
  -8  -8  -6 109.598 27.8809   2 
  -8  -8  -6 76.0278 25.8493   1 
  -8   8  -6 73.7946 20.0522   3 
   8   8   6 69.2733 20.6595   3 
 -10  -8  -6 49.9379 35.6864   2 
 -10   8  -6 -29.241 30.1438   2 
  10   8   6 29.6670 24.2887   1 
  11  -9  -6 -56.122 34.6857   1 
 -11  -9   6 33.6012 29.1722   2 
 -11   9   6 -22.252 30.6505   2 
  11   9  -6 11.9255 25.5790   1 
   9  -9  -6 30.3400 34.8964   1 
  -9  -9   6 36.2619 25.7558   2 
  -9   9   6 66.8879 32.4208   2 
  -9   9   6 24.6751 20.3732   3 
  -7  -9   6 27.2975 29.5681   2 
   7  -9  -6 -8.1482 27.5120   1 
  -7   9   6 -4.0215 15.7771   3 
   7   9  -6 -19.467 10.1379   3 
  -5  -9   6 10.5813 28.6963   2 
   5  -9  -6 26.8515 25.1651   1 
   5  -9  -6 22.4306 24.4399   2 
  -5   9   6 -2.6596 16.1621   3 
   5   9  -6 5.09869 11.8453   3 
   3  -9  -6 60.6016 23.7396   1 
  -3  -9   6 53.6177 36.8439   2 
   3  -9  -6 45.0234 25.9290   2 
   3   9  -6 54.8680 16.4465   3 
  -3   9   6 44.0123 20.1581   3 
   1  -9  -6 6.20066 18.6795   1 
  -1  -9   6 -2.6137 35.0982   2 
   1  -9  -6 12.9418 22.8635   2 
  -1   9   6 12.5203 17.3009   3 
   1   9  -6 -3.5438 12.4698   3 
  -1  -9  -6 -24.927 13.1518   1 
  -1  -9  -6 21.4680 15.8790   2 
   1  -9   6 17.9796 37.7788   2 
   1   9   6 -23.039 15.5754   3 
  -1   9  -6 5.74564 13.6566   3 
  -3  -9  -6 406.577 32.6780   2 
  -3  -9  -6 285.983 32.9636   1 
   3  -9   6 186.733 47.1616   2 
   3   9   6 253.376 33.7518   3 
  -3   9  -6 374.219 34.6690   3 
  -5  -9  -6 -2.5870 16.8763   1 
  -5  -9  -6 24.8758 20.0837   2 
   5  -9   6 47.6078 37.7252   2 
   5   9   6 5.77036 16.8868   3 
  -5   9  -6 8.14880 16.8692   3 
   7  -9   6 27.4492 32.2570   2 
  -7  -9  -6 16.7707 21.3143   1 
  -7   9  -6 43.7339 20.4046   3 
   7   9   6 34.1060 18.3041   3 
   9  -9   6 94.1547 42.4585   2 
  10 -10  -6 9.31991 36.4611   1 
 -10 -10   6 45.0079 33.5247   2 
 -10  10   6 -78.176 31.5072   2 
  -8 -10   6 55.5504 31.1637   2 
   8 -10  -6 115.582 36.0291   1 
   8 -10  -6 133.708 30.5615   2 
  -8  10   6 86.3898 26.7220   3 
   6 -10  -6 81.7406 30.4971   1 
  -6 -10   6 41.6474 32.3467   2 
   6 -10  -6 39.6227 28.0429   2 
  -6  10   6 22.4769 22.8920   3 
   6  10  -6 3.07035 14.3608   3 
  -4 -10   6 71.9202 38.4595   2 
   4 -10  -6 3.93303 25.4648   2 
   4 -10  -6 34.3494 23.2646   1 
  -4  10   6 -20.526 16.7962   3 
   4  10  -6 13.8686 15.1116   3 
   2 -10  -6 113.566 26.3274   1 
   2 -10  -6 109.157 36.7542   2 
  -2 -10   6 92.2573 43.8567   2 
  -2  10   6 120.666 26.6883   3 
   2  10  -6 118.448 23.0720   3 
   0 -10  -6 20.1584 19.9769   1 
   0 -10   6 41.5732 40.7701   2 
   0  10   6 4.67117 16.0388   3 
   0  10  -6 -8.5013 13.0016   3 
   2 -10   6 24.4369 40.1767   2 
  -2 -10  -6 4.31018 16.8627   1 
   2  10   6 17.8861 18.3681   3 
  -2  10  -6 32.5121 17.9681   3 
  -4 -10  -6 17.9504 20.7008   1 
   4 -10   6 8.49033 37.2643   2 
   4  10   6 32.1167 18.9547   3 
  -4  10  -6 54.4109 22.6180   3 
   6 -10   6 60.0687 34.0072   2 
  -6 -10  -6 -10.118 16.1413   1 
   6  10   6 -6.1053 16.9947   3 
  -6  10  -6 9.84845 20.8211   3 
  -8 -10  -6 4.24654 21.1394   1 
   8 -10   6 -28.452 29.7229   2 
  -8  10  -6 11.8643 19.8993   3 
   9 -11  -6 -20.757 30.2261   1 
  -9 -11   6 44.5837 33.5892   2 
  -9  11   6 32.9721 22.9312   3 
  -7 -11   6 75.1413 33.3674   2 
   7 -11  -6 28.4481 31.5097   1 
  -7  11   6 29.8346 24.4986   3 
   7  11  -6 13.1179 14.9119   3 
   5 -11  -6 29.5295 25.1124   1 
  -5 -11   6 52.6358 36.0437   2 
  -5  11   6 33.2999 21.7528   3 
   5  11  -6 -5.9551 14.1253   3 
   3 -11  -6 87.8016 26.3976   1 
  -3 -11   6 55.2804 39.9054   2 
   3  11  -6 78.4543 22.8858   3 
  -3  11   6 65.4572 25.6583   3 
  -1 -11   6 42.6827 41.9303   2 
   1 -11  -6 20.6666 21.2072   1 
   1  11  -6 13.5808 18.4440   3 
  -1  11   6 -8.1734 18.5154   3 
  -1 -11  -6 37.8734 20.5478   1 
   1 -11   6 15.2415 43.4348   2 
  -1  11  -6 14.4724 18.2318   3 
   1  11   6 18.3032 21.4129   3 
   3 -11   6 -19.683 40.3584   2 
  -3 -11  -6 66.5690 23.5121   1 
  -3  11  -6 39.1979 23.4822   3 
   3  11   6 54.1048 24.1395   3 
   5 -11   6 -39.403 37.0365   2 
  -5 -11  -6 17.6562 21.4552   1 
  -5  11  -6 16.4102 22.0230   3 
   5  11   6 -2.7284 17.1302   3 
   7 -11   6 37.3160 44.2068   2 
  -7 -11  -6 23.7009 24.9948   1 
  -7  11  -6 110.414 27.4221   3 
   7  11   6 11.4645 18.3792   3 
  -8  12   6 67.0651 29.4533   3 
   6 -12  -6 56.4141 29.4582   1 
  -6 -12   6 88.7878 38.3189   2 
  -6  12   6 21.8332 23.7460   3 
   6  12  -6 7.13328 18.1663   3 
   4 -12  -6 51.2965 25.3238   1 
  -4 -12   6 10.9321 38.5908   2 
  -4  12   6 33.3244 21.7381   3 
   4  12  -6 22.0478 19.5817   3 
  -2 -12   6 23.9090 43.7349   2 
   2 -12  -6 37.5008 22.7161   1 
  -2  12   6 -2.5459 22.3724   3 
   2  12  -6 -7.8073 18.7514   3 
   0 -12  -6 2.03369 18.8305   1 
   0 -12   6 -3.4701 43.5817   2 
   0  12  -6 8.21976 19.8520   3 
   0  12   6 20.2753 23.1384   3 
   2 -12   6 62.9316 50.4160   2 
  -2 -12  -6 57.7127 23.0099   1 
  -2  12  -6 77.9778 25.6567   3 
   2  12   6 60.3197 26.2159   3 
   4 -12   6 -27.915 45.0061   2 
  -4 -12  -6 93.8313 25.9182   1 
   4  12   6 31.6017 22.7539   3 
  -4  12  -6 26.3242 24.2243   3 
   6 -12   6 -82.076 39.7996   2 
   6  12   6 -9.1520 18.4161   3 
  -6  12  -6 7.95193 24.3280   3 
  -5 -13   6 29.6259 40.4712   2 
   5  13  -6 -13.307 18.0486   3 
  -5  13   6 -25.839 23.0531   3 
  -3 -13   6 16.9332 40.6907   2 
   3  13  -6 40.7385 21.9439   3 
  -3  13   6 29.7484 27.4283   3 
  -1 -13   6 -4.0326 48.5658   2 
   1 -13  -6 38.4297 24.3059   1 
   1  13  -6 14.0571 20.9948   3 
  -1  13   6 -9.8408 21.5269   3 
  -1 -13  -6 22.0941 21.5728   1 
   1 -13   6 -20.154 48.3819   2 
  -1  13  -6 38.2419 26.3077   3 
   1  13   6 2.47411 22.1957   3 
   3 -13   6 -26.661 50.4542   2 
  -3 -13  -6 31.4573 24.0086   1 
   3  13   6 13.0913 25.1188   3 
  -3  13  -6 107.514 32.2962   3 
   0  14   6 2.88272 23.1562   3 
  14   0  -7 -3.2537 27.1919   1 
 -14   0   7 122.117 33.0440   2 
 -12   0   7 1.02468 18.6276   2 
  12   0  -7 -11.795 21.5676   1 
  10   0  -7 -19.989 16.6876   1 
 -10   0   7 -36.103 13.1100   2 
  -8   0   7 1022.52 60.6769   2 
  -8   0   7 1010.18 46.7174   3 
   8   0  -7 982.346 58.2317   1 
  -6   0   7 361.952 31.0941   2 
   6   0  -7 371.895 29.8388   1 
  -6   0   7 356.277 24.2226   3 
  -4   0   7 214.060 21.7131   2 
   4   0  -7 241.214 24.6713   1 
   2   0  -7 1233.56 56.0344   3 
  -2   0   7 1142.75 55.3816   2 
   2   0  -7 1245.75 57.7315   1 
   0   0   7 1982.69 87.0887   2 
   0   0  -7 2023.78 88.4705   1 
   0   0  -7 2110.84 88.4292   3 
  -2   0  -7 300.673 21.2984   2 
  -2   0  -7 281.230 22.4286   3 
  -2   0  -7 334.820 24.2295   1 
  -4   0  -7 1576.51 72.5437   3 
  -4   0  -7 1633.66 75.9981   2 
  -4   0  -7 1603.88 76.3719   1 
   6   0   7 1437.43 71.7805   3 
  -6   0  -7 1515.65 76.0794   1 
  -6   0  -7 1507.52 77.0874   2 
  -8   0  -7 1008.00 63.1535   2 
   8   0   7 1020.39 62.2142   1 
   8   0   7 1003.56 53.8544   3 
  10   0   7 56.4416 20.9649   1 
 -10   0  -7 64.1367 27.1799   2 
 -12   0  -7 -5.6144 24.0528   2 
  12   0   7 0.91962 17.2542   1 
 -13  -1   7 37.4986 26.1879   2 
  13  -1  -7 35.6714 27.9243   1 
  13   1  -7 -24.756 20.1174   1 
 -13   1   7 54.3462 26.6108   2 
 -11  -1   7 17.4258 20.4874   2 
  11  -1  -7 -20.091 21.2880   1 
  11   1  -7 16.3990 22.1571   1 
 -11   1   7 -7.4864 19.8679   2 
  -9  -1   7 334.313 35.0939   2 
   9  -1  -7 246.426 33.8836   1 
  -9   1   7 275.451 19.0328   3 
   9   1  -7 281.183 32.6886   1 
  -9   1   7 280.049 32.7115   2 
  -7  -1   7 146.193 26.6519   2 
  -7  -1   7 150.784 16.3636   3 
   7  -1  -7 149.387 25.7567   1 
   7   1  -7 137.079 23.6516   1 
  -7   1   7 118.958 14.2776   3 
  -7   1   7 155.275 25.6800   2 
   5  -1  -7 121.268 21.2264   1 
  -5  -1   7 80.5432 19.7213   2 
  -5   1   7 102.834 18.6079   2 
   5   1  -7 68.0690 11.4593   3 
   5   1  -7 107.347 19.4255   1 
  -5   1   7 84.5035 14.1287   3 
  -3  -1   7 2239.89 97.9790   2 
   3  -1  -7 2205.81 98.4250   1 
  -3   1   7 2199.41 96.4998   3 
   3   1  -7 2229.34 96.0440   1 
  -3   1   7 2311.13 93.9423   2 
   3   1  -7 2173.19 94.0694   3 
   1  -1  -7 664.490 35.9610   1 
  -1  -1   7 629.505 38.5064   2 
   1   1  -7 655.193 33.6875   1 
  -1   1   7 543.788 35.1788   3 
   1   1  -7 642.365 33.6543   3 
  -1   1   7 572.556 29.7820   2 
   1  -1   7 1559.04 71.9943   2 
  -1  -1  -7 1513.93 70.9101   1 
  -1   1  -7 1455.39 67.8210   1 
   1   1   7 1604.88 72.2361   3 
  -1   1  -7 1516.90 68.8078   3 
  -3  -1  -7 22.8900 10.0649   2 
  -3  -1  -7 32.8465 13.0285   1 
  -3   1  -7 9.48456 10.1057   3 
  -3   1  -7 7.47555 11.3264   2 
  -3   1  -7 11.8625 10.5882   1 
   3   1   7 17.0938 11.2558   3 
  -5  -1  -7 10.7830 11.6276   2 
  -5  -1  -7 18.4566 12.2249   1 
   5   1   7 13.9256 11.2180   3 
  -5   1  -7 23.3377 11.3369   3 
  -5   1  -7 6.31526 12.1484   1 
  -5   1  -7 24.7215 13.5322   2 
  -7  -1  -7 478.166 38.5534   2 
   7  -1   7 449.910 36.2496   1 
  -7  -1  -7 472.447 37.6066   1 
  -7   1  -7 464.225 30.3900   3 
   7   1   7 457.073 31.6661   3 
  -7   1  -7 398.061 39.3577   2 
   9  -1   7 28.4993 18.9641   1 
  -9  -1  -7 31.9107 19.3960   2 
   9   1   7 1.15356 15.5869   1 
  -9   1  -7 13.0857 21.3898   2 
  11  -1   7 31.1643 21.2807   1 
 -11  -1  -7 -12.016 18.3626   2 
  11   1   7 23.4562 20.2882   1 
 -11   1  -7 27.5368 25.0718   2 
 -14  -2   7 164.895 38.8786   2 
  14  -2  -7 73.0777 34.2222   1 
  14   2  -7 46.2088 27.4842   1 
 -14   2   7 93.9298 33.6565   2 
  12  -2  -7 50.0783 27.5723   1 
 -12  -2   7 77.5834 29.1808   2 
  12   2  -7 80.7417 26.7930   1 
 -12   2   7 38.8442 25.3357   2 
  10  -2  -7 27.6186 23.2332   1 
 -10  -2   7 58.4251 24.0229   2 
  10   2  -7 44.7881 20.2511   1 
 -10   2   7 73.0883 26.2634   2 
   8  -2  -7 399.885 39.6760   1 
  -8  -2   7 476.737 40.8168   2 
   8   2  -7 465.129 37.1151   1 
  -8   2   7 447.368 26.7925   3 
  -8   2   7 430.825 35.9405   2 
  -6  -2   7 81.8286 23.1859   2 
   6  -2  -7 78.3032 21.2922   1 
   6   2  -7 102.178 18.2399   1 
  -6   2   7 70.9913 13.0008   3 
   6   2  -7 63.7669 11.4426   3 
  -6   2   7 43.0575 15.8869   2 
   4  -2  -7 825.899 48.7144   1 
  -4  -2   7 903.546 51.4836   2 
  -4   2   7 946.133 45.3331   3 
  -4   2   7 827.293 42.5179   2 
   4   2  -7 842.346 44.3247   1 
   4   2  -7 799.651 41.5947   3 
   2  -2  -7 2249.08 99.3245   1 
  -2  -2   7 2230.42 101.729   2 
  -2   2   7 2369.55 98.7293   3 
  -2   2   7 2099.52 89.5143   2 
   2   2  -7 2306.54 95.3899   1 
   2   2  -7 2297.63 95.7804   3 
   0  -2   7 35.6413 18.2538   2 
   0  -2  -7 33.6629 13.7863   1 
   0   2  -7 42.9839 10.6988   1 
   0   2   7 44.0940 12.8983   3 
   0   2  -7 51.7917 10.0779   3 
  -2  -2  -7 1788.94 76.7604   2 
  -2  -2  -7 1761.34 84.3322   1 
   2  -2   7 1994.43 89.9246   2 
   2   2   7 1891.25 83.9341   3 
  -2   2  -7 1698.08 78.8947   1 
  -2   2  -7 1880.79 81.5029   3 
  -4  -2  -7 77.2092 17.4580   1 
  -4  -2  -7 69.0877 14.2655   2 
  -4   2  -7 76.4470 14.8735   3 
  -4   2  -7 50.5517 14.1142   1 
  -4   2  -7 68.4401 17.9481   2 
   4   2   7 62.2036 14.8666   3 
  -6  -2  -7 491.102 38.1336   1 
   6  -2   7 498.196 36.2114   1 
  -6  -2  -7 493.330 36.2253   2 
   6   2   7 483.174 32.4506   3 
  -6   2  -7 497.993 32.4882   3 
  -6   2  -7 455.088 39.1097   2 
  -8  -2  -7 38.8167 17.9493   1 
  -8  -2  -7 49.9956 21.1705   2 
   8  -2   7 57.3051 20.7266   1 
  -8   2  -7 24.8139 19.7394   2 
  -8   2  -7 66.6818 14.6135   3 
   8   2   7 55.4633 14.6270   3 
 -10  -2  -7 57.4048 25.2442   2 
  10  -2   7 40.2195 21.1605   1 
  10   2   7 79.3350 24.2556   1 
 -10   2  -7 49.5076 26.8820   2 
  12  -2   7 10.5470 19.2697   1 
 -12  -2  -7 36.5470 24.6877   2 
 -12   2  -7 41.2755 31.7467   2 
  12   2   7 21.1560 21.5709   1 
 -13  -3   7 69.6635 27.7299   2 
  13  -3  -7 -7.5476 26.8186   1 
 -13   3   7 55.8295 26.4793   2 
  13   3  -7 -18.222 20.5583   1 
  11  -3  -7 -16.205 24.7025   1 
 -11  -3   7 16.0627 21.1914   2 
 -11   3   7 22.7740 21.0358   2 
  11   3  -7 6.34782 19.2051   1 
   9  -3  -7 142.806 30.4281   1 
  -9  -3   7 149.657 30.7113   2 
   9   3  -7 114.047 24.1843   1 
   9   3  -7 114.549 14.0955   3 
  -9   3   7 140.833 17.0614   3 
  -9   3   7 139.183 27.3561   2 
   7  -3  -7 5.56790 20.7761   1 
  -7  -3   7 12.8954 19.6288   2 
  -7   3   7 13.0304 10.8113   3 
   7   3  -7 6.27770 7.61661   3 
   7   3  -7 7.55359 13.7947   1 
  -7   3   7 0.14584 14.5769   2 
   5  -3  -7 23.1312 18.6055   1 
  -5  -3   7 -8.0257 17.9624   2 
   5   3  -7 6.15807 6.97072   3 
   5   3  -7 13.3589 11.7843   1 
  -5   3   7 -13.269 8.28432   3 
  -5   3   7 4.56565 10.2399   2 
   3  -3  -7 815.254 47.4602   1 
  -3  -3   7 828.894 51.3674   2 
   3   3  -7 852.891 40.8990   3 
  -3   3   7 758.752 36.3610   2 
  -3   3   7 766.598 42.5330   3 
   3   3  -7 758.146 40.1787   1 
  -1  -3   7 290.488 33.8942   2 
   1  -3  -7 241.708 23.8034   1 
   1   3  -7 291.237 21.2194   3 
   1   3  -7 257.636 17.9625   1 
  -1   3   7 277.599 23.0647   3 
  -1  -3  -7 1862.60 86.2598   1 
   1  -3   7 1933.52 91.1349   2 
  -1   3  -7 1874.35 78.2978   1 
   1   3   7 1890.97 84.9943   3 
  -1   3  -7 1765.02 82.3532   3 
  -3  -3  -7 226.230 27.8135   1 
  -3  -3  -7 200.358 17.4469   2 
  -3   3  -7 209.699 24.8563   2 
  -3   3  -7 196.916 19.6730   3 
  -3   3  -7 180.672 18.1847   1 
   3   3   7 221.787 21.8729   3 
  -5  -3  -7 -0.4308 11.9558   2 
   5  -3   7 -0.2820 9.92712   1 
  -5  -3  -7 -2.0434 11.3928   1 
  -5   3  -7 -9.8145 8.97913   3 
   5   3   7 2.02763 10.4970   3 
  -5   3  -7 -10.186 14.1434   2 
  -7  -3  -7 599.596 43.2392   2 
  -7  -3  -7 610.226 44.9235   1 
   7  -3   7 605.004 42.3672   1 
  -7   3  -7 569.977 47.1560   2 
  -7   3  -7 578.732 36.5257   3 
   7   3   7 507.644 35.7925   3 
   9  -3   7 -1.2554 16.1490   1 
  -9  -3  -7 36.3012 21.7713   2 
  -9   3  -7 18.3184 20.0154   2 
   9   3   7 -1.3215 14.5962   1 
  11  -3   7 33.9329 21.8495   1 
 -11  -3  -7 6.20270 20.4997   2 
  11   3   7 7.43020 17.7815   1 
 -11   3  -7 -28.848 20.5192   2 
 -12  -4   7 29.1182 22.4380   2 
  12  -4  -7 -22.259 27.6444   1 
 -12   4   7 21.5603 25.7383   2 
  12   4  -7 19.6975 23.3767   1 
  10  -4  -7 -20.210 23.7130   1 
 -10  -4   7 44.3884 23.9083   2 
 -10   4   7 11.2004 21.7208   2 
  10   4  -7 -12.533 15.5035   1 
   8  -4  -7 914.299 62.2525   1 
  -8  -4   7 940.405 63.3061   2 
   8   4  -7 906.085 53.8050   1 
  -8   4   7 978.086 48.2220   3 
  -8   4   7 794.670 53.7591   2 
   8   4  -7 981.195 45.6821   3 
   6  -4  -7 16.7863 21.0958   1 
  -6  -4   7 1.27657 20.7574   2 
  -6   4   7 4.64446 13.3003   2 
  -6   4   7 11.1941 11.0120   3 
   6   4  -7 5.72582 7.73175   3 
   6   4  -7 17.3089 14.1074   1 
   4  -4  -7 29.8996 18.4215   1 
  -4  -4   7 8.90380 22.8730   2 
  -4   4   7 13.3294 11.3495   3 
   4   4  -7 -1.5691 11.4793   1 
   4   4  -7 24.2256 9.22578   3 
  -4   4   7 14.6049 10.2484   2 
   2  -4  -7 328.085 28.8401   1 
  -2  -4   7 315.395 37.6012   2 
  -2   4   7 338.986 26.0074   3 
   2   4  -7 284.355 22.4167   3 
   2   4  -7 297.631 19.9872   1 
   0  -4   7 435.379 40.9004   2 
   0  -4  -7 464.392 32.9701   1 
   0   4   7 465.749 31.4355   3 
   0   4  -7 425.584 28.2372   3 
   0   4  -7 425.953 22.2791   1 
   2  -4   7 437.950 40.6353   2 
  -2  -4  -7 437.814 33.3921   1 
  -2  -4  -7 428.110 23.4525   2 
  -2   4  -7 425.358 24.1273   1 
  -2   4  -7 418.922 29.1217   3 
   2   4   7 450.844 31.4507   3 
  -4  -4  -7 312.363 24.7783   2 
   4  -4   7 330.591 24.8188   1 
  -4  -4  -7 356.430 30.6770   1 
  -4   4  -7 317.180 25.6617   3 
   4   4   7 331.604 27.6722   3 
  -4   4  -7 343.446 33.8481   2 
   6  -4   7 181.877 25.5142   1 
  -6  -4  -7 206.292 24.6455   2 
  -6  -4  -7 164.846 27.8305   1 
   6   4   7 160.226 22.3033   3 
  -6   4  -7 176.926 22.7982   3 
  -6   4  -7 188.254 33.0455   2 
  -8  -4  -7 159.414 29.3530   2 
  -8  -4  -7 125.244 27.1190   1 
   8  -4   7 191.749 28.9005   1 
   8   4   7 123.277 19.7554   3 
  -8   4  -7 142.118 33.3332   2 
  -8   4  -7 102.012 19.4696   3 
 -10  -4  -7 -39.986 16.9463   2 
  10  -4   7 3.15003 18.5407   1 
 -10   4  -7 -30.747 21.3621   2 
  10   4   7 4.82194 16.7330   1 
 -13  -5   7 3.98090 20.6098   2 
  13  -5  -7 -58.952 31.1170   1 
  13   5  -7 -28.479 18.6524   1 
 -13   5   7 -12.575 27.3764   2 
  11  -5  -7 -56.269 26.6181   1 
 -11  -5   7 -14.567 18.0953   2 
  11   5  -7 -12.612 16.8685   1 
 -11   5   7 -13.963 22.3089   2 
   9  -5  -7 90.6444 31.7394   1 
  -9  -5   7 101.509 31.4230   2 
  -9   5   7 98.9832 17.4169   3 
   9   5  -7 104.839 15.1931   3 
   9   5  -7 108.134 25.5480   1 
  -9   5   7 106.131 26.7942   2 
  -7  -5   7 29.5457 25.6394   2 
   7  -5  -7 14.7467 25.9772   1 
   7   5  -7 2.40659 14.9521   1 
  -7   5   7 14.0041 17.4282   2 
  -7   5   7 0.60823 11.6213   3 
   7   5  -7 5.17094 8.78274   3 
  -5  -5   7 3.74648 22.1602   2 
   5  -5  -7 -8.8176 21.8204   1 
   5   5  -7 0.25141 8.38729   3 
  -5   5   7 8.77269 11.8624   3 
  -5   5   7 -5.9848 13.2097   2 
   5   5  -7 -9.3972 12.2460   1 
  -3  -5   7 694.417 54.5156   2 
   3  -5  -7 720.050 46.1758   1 
  -3   5   7 732.910 41.7527   3 
   3   5  -7 639.760 37.6535   3 
   3   5  -7 638.805 34.6598   1 
   1  -5  -7 155.410 24.5724   1 
  -1  -5   7 158.215 34.9677   2 
  -1   5   7 139.311 19.8815   3 
   1   5  -7 142.474 18.1034   3 
   1  -5   7 586.218 51.3415   2 
  -1  -5  -7 648.369 43.3195   1 
   1   5   7 642.720 40.5674   3 
  -1   5  -7 717.024 39.4398   3 
  -3  -5  -7 165.386 26.1819   1 
   3  -5   7 157.096 15.3228   1 
  -3  -5  -7 145.873 17.0371   2 
   3  -5   7 175.167 35.0614   2 
  -3   5  -7 214.948 22.7195   3 
   3   5   7 171.108 22.7478   3 
  -5  -5  -7 54.0007 19.7873   1 
   5  -5   7 48.5696 13.6981   1 
  -5  -5  -7 72.8250 18.3603   2 
   5   5   7 47.8635 16.4441   3 
  -5   5  -7 51.9518 15.8134   3 
  -5   5  -7 49.4564 22.9158   2 
   7  -5   7 436.485 35.2922   1 
  -7  -5  -7 490.435 39.4176   2 
  -7  -5  -7 487.728 41.6771   1 
   7   5   7 507.749 35.2789   3 
  -7   5  -7 443.396 46.2761   2 
  -7   5  -7 454.513 33.8810   3 
  -9  -5  -7 15.3302 20.6726   2 
  -9  -5  -7 23.9495 19.5120   1 
   9  -5   7 28.4318 18.8415   1 
  -9   5  -7 9.81939 27.0285   2 
  11  -5   7 -26.899 18.7630   1 
 -11  -5  -7 39.6694 27.6737   2 
  11   5   7 21.0727 24.3139   1 
 -11   5  -7 5.90180 29.9790   2 
 -12  -6   7 41.0451 27.3724   2 
  12  -6  -7 -69.673 29.0466   1 
 -12   6   7 -6.4747 28.3679   2 
  12   6  -7 12.4698 23.0781   1 
  10  -6  -7 -1.0193 29.7508   1 
 -10  -6   7 11.4683 23.3881   2 
  10   6  -7 14.9489 18.2795   1 
 -10   6   7 8.96447 23.9776   2 
  -8  -6   7 135.385 34.9228   2 
   8  -6  -7 143.332 34.3581   1 
  -8   6   7 194.450 31.9193   2 
   8   6  -7 209.761 28.2977   1 
   8   6  -7 140.348 18.3645   3 
  -8   6   7 192.743 22.5306   3 
   6  -6  -7 -4.4877 27.0106   1 
  -6  -6   7 15.9481 26.8062   2 
  -6   6   7 11.8027 17.9018   2 
   6   6  -7 7.49745 10.0069   3 
  -6   6   7 -10.825 13.0264   3 
   6   6  -7 2.73311 13.8476   1 
  -4  -6   7 217.351 40.8038   2 
   4  -6  -7 229.307 33.3817   1 
  -4   6   7 249.586 25.7968   3 
   4   6  -7 224.797 21.8219   3 
   4   6  -7 226.618 21.0118   1 
   2  -6  -7 847.742 43.9409   2 
  -2  -6   7 824.806 65.3011   2 
   2  -6  -7 876.910 53.2165   1 
  -2   6   7 965.457 51.6879   3 
   2   6  -7 936.620 48.6771   3 
   0  -6   7 -2.8667 28.6321   2 
   0  -6  -7 21.9354 17.2061   1 
   0   6   7 18.3873 13.7332   3 
   0   6  -7 1.45743 9.94315   3 
  -2  -6  -7 298.009 31.4334   1 
  -2  -6  -7 313.187 21.7486   2 
   2  -6   7 306.690 45.0941   2 
  -2   6  -7 273.750 26.3692   3 
   2   6   7 274.132 28.0586   3 
   4  -6   7 -7.5742 8.24578   1 
   4  -6   7 -21.491 25.5414   2 
  -4  -6  -7 2.84774 15.6024   1 
  -4  -6  -7 -1.2153 11.1813   2 
  -4   6  -7 4.20638 12.8210   3 
   4   6   7 -5.9548 13.1446   3 
  -6  -6  -7 12.5622 15.4900   2 
  -6  -6  -7 -6.1545 12.5569   1 
   6  -6   7 9.70185 11.9815   1 
  -6   6  -7 4.95984 22.2807   2 
   6   6   7 -11.593 11.1284   3 
  -6   6  -7 -2.1835 12.8703   3 
   8  -6   7 225.363 32.3013   1 
  -8  -6  -7 269.325 38.6126   1 
  -8  -6  -7 253.253 31.7834   2 
  -8   6  -7 252.505 26.7598   3 
   8   6   7 287.011 28.7614   3 
  -8   6  -7 223.106 42.3532   2 
 -10  -6  -7 159.348 33.0590   2 
  10   6   7 69.1196 24.3871   1 
 -10   6  -7 75.3363 34.3071   2 
 -11  -7   7 -11.930 23.6142   2 
  11  -7  -7 -22.216 33.2749   1 
  11   7  -7 13.4617 21.2081   1 
 -11   7   7 -41.982 23.3031   2 
  -9  -7   7 62.5848 28.9043   2 
   9  -7  -7 89.2013 34.1694   1 
   9   7  -7 62.5488 21.2928   1 
   9   7  -7 46.1849 17.4482   3 
  -9   7   7 99.0705 28.7773   2 
  -9   7   7 65.3728 18.6768   3 
   7  -7  -7 31.5079 29.7724   1 
  -7  -7   7 52.4617 29.6705   2 
   7   7  -7 36.7538 16.5118   1 
   7   7  -7 53.8012 13.7132   3 
  -7   7   7 53.1107 23.7074   2 
  -7   7   7 41.1351 17.1054   3 
   5  -7  -7 52.4047 28.5738   1 
  -5  -7   7 51.7976 33.0075   2 
  -5   7   7 51.2098 20.6209   2 
   5   7  -7 61.1410 15.7813   1 
   5   7  -7 44.0979 14.4137   3 
  -5   7   7 48.0162 17.3735   3 
   3  -7  -7 371.884 30.8971   2 
   3  -7  -7 425.246 39.3097   1 
  -3  -7   7 322.391 51.5604   2 
   3   7  -7 429.449 31.4044   3 
  -3   7   7 371.149 33.2064   3 
   1  -7  -7 17.0285 17.9817   1 
   1  -7  -7 29.4564 13.9197   2 
  -1  -7   7 11.6535 34.6285   2 
   1   7  -7 38.2787 14.1328   3 
  -1   7   7 9.65113 14.6924   3 
   1  -7   7 251.459 47.5135   2 
  -1  -7  -7 309.728 22.6399   2 
  -1  -7  -7 282.330 31.8920   1 
  -1   7  -7 310.418 28.3634   3 
   1   7   7 276.536 30.0846   3 
   3  -7   7 22.4827 30.8215   2 
  -3  -7  -7 2.81820 15.5659   1 
  -3  -7  -7 -7.6293 10.3301   2 
  -3   7  -7 22.2386 14.3104   3 
   3   7   7 19.5642 16.4010   3 
   5  -7   7 62.8034 33.2441   2 
  -5  -7  -7 123.350 22.3002   2 
  -5  -7  -7 112.016 26.0146   1 
  -5   7  -7 120.115 21.8424   3 
   5   7   7 89.8563 20.4841   3 
  -7  -7  -7 117.946 25.2724   2 
  -7  -7  -7 90.7475 26.1589   1 
  -7   7  -7 90.9819 20.2725   3 
   7   7   7 99.4229 22.6598   3 
  -9  -7  -7 -8.8268 18.9468   1 
  -9  -7  -7 24.8965 19.7711   2 
  -9   7  -7 -37.016 24.4345   2 
 -12  -8   7 10.4772 28.8268   2 
 -12   8   7 -37.800 29.6572   2 
  10  -8  -7 -48.967 30.0288   1 
 -10  -8   7 34.5669 27.7539   2 
  10   8  -7 -17.577 18.4795   1 
 -10   8   7 5.93841 26.9296   2 
  -8  -8   7 71.9766 30.8151   2 
   8  -8  -7 78.8778 34.5060   1 
   8   8  -7 120.805 23.9874   1 
   8   8  -7 119.588 18.2731   3 
  -8   8   7 150.639 34.5851   2 
  -8   8   7 104.732 23.3079   3 
  -6  -8   7 3.05897 27.9957   2 
   6  -8  -7 -13.917 24.3918   1 
   6   8  -7 13.4542 12.1488   3 
   6   8  -7 4.06784 19.4290   1 
  -6   8   7 -19.061 14.1263   3 
   4  -8  -7 12.6790 23.0248   1 
  -4  -8   7 -1.6012 31.7935   2 
   4  -8  -7 25.9865 20.3225   2 
   4   8  -7 3.04802 11.8029   3 
  -4   8   7 -18.301 15.1192   3 
  -2  -8   7 45.7781 39.6058   2 
   2  -8  -7 93.3457 25.4517   1 
   2  -8  -7 23.8459 20.6402   2 
   2   8  -7 76.9309 17.6853   3 
  -2   8   7 45.8690 19.5714   3 
   0  -8   7 25.8237 37.6856   2 
   0  -8  -7 7.19758 18.1009   1 
   0  -8  -7 48.3315 20.3249   2 
   0   8   7 8.94702 17.1757   3 
   0   8  -7 24.3913 14.0195   3 
  -2  -8  -7 302.753 34.2478   1 
   2  -8   7 267.906 50.0030   2 
   2   8   7 333.848 34.3708   3 
  -2   8  -7 305.486 30.0577   3 
  -4  -8  -7 107.468 26.2295   1 
   4  -8   7 42.9669 32.6902   2 
   4   8   7 104.685 23.7764   3 
  -4   8  -7 96.8914 21.7452   3 
   6  -8   7 51.9917 35.1466   2 
  -6  -8  -7 11.2861 17.6943   1 
  -6   8  -7 29.7073 17.1232   3 
   6   8   7 -7.3176 15.6219   3 
   8  -8   7 94.2431 38.4933   2 
  -8  -8  -7 43.9003 23.0571   1 
   8   8   7 54.1915 29.5788   3 
  -8   8  -7 59.3809 20.4934   3 
 -11  -9   7 25.4271 29.7142   2 
  11  -9  -7 -49.580 35.6095   1 
 -11   9   7 -32.715 31.1044   2 
   9  -9  -7 63.1193 35.3031   1 
  -9  -9   7 34.9323 29.5163   2 
  -9   9   7 58.3376 24.7836   3 
  -9   9   7 84.8240 34.1661   2 
   7  -9  -7 5.05104 29.5607   1 
  -7  -9   7 2.52880 27.9025   2 
   7   9  -7 7.77028 12.3235   3 
  -7   9   7 -17.836 14.7536   3 
  -5  -9   7 0.01533 30.6294   2 
   5  -9  -7 -18.591 20.5361   2 
   5  -9  -7 16.5562 23.6054   1 
  -5   9   7 4.01012 17.7557   3 
   5   9  -7 -12.693 10.8584   3 
   3  -9  -7 88.3130 25.9480   1 
  -3  -9   7 50.1976 38.3378   2 
   3   9  -7 94.4822 20.1167   3 
  -3   9   7 54.2836 20.9287   3 
  -1  -9   7 24.0966 36.7653   2 
   1  -9  -7 18.2719 21.1007   1 
   1   9  -7 49.2179 17.3722   3 
  -1   9   7 27.4939 18.4797   3 
   1  -9   7 59.8914 41.7935   2 
  -1  -9  -7 39.7851 20.3455   1 
   1   9   7 41.8994 20.1745   3 
  -1   9  -7 48.7180 18.6284   3 
  -3  -9  -7 34.6699 19.6371   1 
   3  -9   7 39.9140 36.3955   2 
   3   9   7 29.5046 18.8071   3 
  -3   9  -7 31.4074 16.6673   3 
  -5  -9  -7 15.8171 19.6708   1 
   5  -9   7 -34.102 27.9792   2 
  -5   9  -7 20.2522 16.8143   3 
   5   9   7 4.48179 17.5674   3 
   7  -9   7 94.4380 41.4622   2 
  -7  -9  -7 86.5986 27.0557   1 
  -7   9  -7 103.794 22.5924   3 
   7   9   7 87.2142 23.5420   3 
   9  -9   7 92.6510 41.1469   2 
  10 -10  -7 -19.724 33.7822   1 
 -10 -10   7 -12.221 27.6127   2 
 -10  10   7 -93.157 31.8074   2 
  -8 -10   7 117.612 39.9235   2 
   8 -10  -7 111.422 35.7452   1 
  -8  10   7 99.6884 26.8578   3 
   6 -10  -7 27.0888 27.3292   1 
  -6 -10   7 -15.068 26.0734   2 
   6  10  -7 -1.6289 12.8791   3 
  -6  10   7 -1.4368 17.7181   3 
  -4 -10   7 71.0727 39.5853   2 
   4 -10  -7 104.569 28.5740   1 
  -4  10   7 11.2994 19.6532   3 
   4  10  -7 56.7875 19.7569   3 
   2 -10  -7 144.088 28.9324   1 
  -2 -10   7 117.345 48.2093   2 
   2  10  -7 125.364 24.4101   3 
  -2  10   7 162.621 29.5684   3 
   0 -10   7 -1.5625 40.6978   2 
   0 -10  -7 32.7074 21.3562   1 
   0  10   7 3.62848 19.2301   3 
   0  10  -7 17.4731 15.7916   3 
  -2 -10  -7 28.4061 20.9619   1 
   2 -10   7 31.9751 41.9483   2 
   2  10   7 4.16993 18.7559   3 
  -2  10  -7 56.6921 22.3624   3 
  -4 -10  -7 -5.8252 18.5629   1 
   4 -10   7 48.9712 41.2795   2 
  -4  10  -7 40.0249 22.5823   3 
   4  10   7 20.0041 17.9217   3 
  -6 -10  -7 20.1742 21.0814   1 
   6 -10   7 -43.154 31.7003   2 
  -6  10  -7 -8.6442 16.8462   3 
   6  10   7 -12.175 16.1855   3 
   8 -10   7 -47.364 34.3947   2 
  -8  10  -7 24.4114 22.8353   3 
  -9 -11   7 48.2229 31.5659   2 
  -9  11   7 20.4857 23.4691   3 
   7 -11  -7 30.8465 30.6843   1 
  -7 -11   7 -0.4894 34.6861   2 
   7  11  -7 -8.8701 12.9814   3 
  -7  11   7 -3.3912 19.9413   3 
  -5 -11   7 15.6629 35.2235   2 
   5 -11  -7 21.7927 26.1007   1 
   5  11  -7 2.71643 15.4553   3 
  -5  11   7 -8.5469 20.9226   3 
  -3 -11   7 78.7046 43.5513   2 
   3 -11  -7 48.5688 23.5438   1 
   3  11  -7 51.7826 20.7928   3 
  -3  11   7 31.9286 23.8561   3 
   1 -11  -7 5.65433 20.2618   1 
  -1 -11   7 -1.4395 42.0327   2 
   1  11  -7 14.1342 18.1804   3 
  -1  11   7 9.03743 19.2008   3 
  -1 -11  -7 90.9798 26.5909   1 
   1 -11   7 13.0011 42.8222   2 
  -1  11  -7 105.120 25.4025   3 
   1  11   7 46.6529 23.8496   3 
  -3 -11  -7 30.9114 21.7141   1 
   3 -11   7 12.9486 44.7408   2 
  -3  11  -7 60.1809 23.9597   3 
   3  11   7 47.1256 22.0992   3 
  -5 -11  -7 3.71025 21.1857   1 
   5 -11   7 -9.6554 43.5947   2 
   5  11   7 -6.8304 19.7030   3 
  -5  11  -7 15.4013 20.5901   3 
   7  11   7 34.2879 23.5862   3 
  -6 -12   7 92.2819 41.0459   2 
   6 -12  -7 49.5283 28.5750   1 
  -6  12   7 24.1791 24.6080   3 
   6  12  -7 13.9020 17.0804   3 
   4 -12  -7 43.4096 25.4127   1 
  -4 -12   7 72.0999 44.2833   2 
  -4  12   7 -15.385 18.9202   3 
   4  12  -7 -6.9286 17.7462   3 
  -2 -12   7 72.1682 45.3832   2 
   2 -12  -7 6.50129 19.5422   1 
   2  12  -7 12.4470 20.2568   3 
  -2  12   7 -42.008 16.7826   3 
   0 -12  -7 -7.3187 18.6293   1 
   0 -12   7 -58.788 40.4240   2 
   0  12   7 15.3771 23.4699   3 
   0  12  -7 -11.371 17.7290   3 
   2 -12   7 -30.000 43.5714   2 
  -2 -12  -7 90.5015 26.7565   1 
  -2  12  -7 74.4515 25.9708   3 
   2  12   7 70.8264 28.8815   3 
  -4 -12  -7 22.2340 22.2316   1 
   4 -12   7 14.2973 51.2381   2 
  -4  12  -7 17.4642 24.2624   3 
   4  12   7 -13.660 17.8447   3 
  -5 -13   7 88.8557 44.0075   2 
  -5  13   7 7.72520 24.1292   3 
   5  13  -7 6.04658 19.4919   3 
   3 -13  -7 61.3530 26.9041   1 
  -3 -13   7 9.85133 46.2158   2 
  -3  13   7 17.5646 27.6016   3 
   3  13  -7 13.6528 22.0598   3 
  -1 -13   7 -10.508 47.9767   2 
   1 -13  -7 -5.9353 19.6240   1 
  -1  13   7 -11.219 24.3312   3 
   1  13  -7 -9.6244 20.6732   3 
   1 -13   7 -5.5303 53.4984   2 
  -1 -13  -7 47.9892 24.1124   1 
  -1  13  -7 31.3794 25.3876   3 
   1  13   7 -5.3889 24.9922   3 
   3 -13   7 3.53006 55.0028   2 
  -3  13  -7 82.5802 29.8378   3 
   3  13   7 -4.3183 24.7813   3 
 -14   0   8 181.624 40.1105   2 
  14   0  -8 76.8835 34.9314   1 
 -12   0   8 109.040 30.4910   2 
  12   0  -8 45.4640 26.9024   1 
  10   0  -8 68.7513 25.1445   1 
 -10   0   8 51.3441 23.9979   2 
  -8   0   8 920.148 57.0898   2 
   8   0  -8 914.377 56.5232   1 
  -8   0   8 865.915 44.2758   3 
  -6   0   8 5.59060 15.6351   2 
  -6   0   8 12.0798 10.0050   3 
   6   0  -8 39.9479 18.6016   1 
  -4   0   8 268.024 24.1121   2 
   4   0  -8 242.861 26.6223   1 
   2   0  -8 864.879 45.7585   1 
   2   0  -8 914.196 44.2582   3 
  -2   0   8 802.698 43.5403   2 
   0   0  -8 52.0438 11.7442   3 
   0   0   8 50.6852 15.7294   2 
   0   0  -8 42.1457 12.5329   1 
  -2   0  -8 1406.26 68.4458   1 
  -2   0  -8 1506.28 67.3867   3 
  -2   0  -8 1370.11 64.5319   2 
  -4   0  -8 902.969 46.4892   3 
  -4   0  -8 889.228 49.3979   1 
  -4   0  -8 807.777 47.1981   2 
  -6   0  -8 477.828 38.0241   2 
   6   0   8 456.495 34.7506   3 
  -6   0  -8 460.303 37.3244   1 
  -8   0  -8 1972.03 100.143   2 
   8   0   8 1810.91 89.8639   3 
   8   0   8 2003.46 100.157   1 
 -10   0  -8 20.4082 21.0223   2 
  10   0   8 -22.519 11.8042   1 
  13  -1  -8 -4.2416 26.3450   1 
 -13  -1   8 62.4280 28.9842   2 
 -13   1   8 89.3334 29.0239   2 
  13   1  -8 55.4846 27.2668   1 
  11  -1  -8 40.0209 26.3252   1 
 -11  -1   8 49.4680 25.1383   2 
  11   1  -8 41.8560 26.0063   1 
 -11   1   8 49.4258 24.5405   2 
  -9  -1   8 303.335 21.9395   3 
  -9  -1   8 333.693 35.8594   2 
   9  -1  -8 328.915 37.5768   1 
  -9   1   8 280.334 21.0440   3 
  -9   1   8 309.410 32.9396   2 
   9   1  -8 263.087 34.5490   1 
  -7  -1   8 63.9417 13.6728   3 
   7  -1  -8 63.4626 23.2238   1 
  -7  -1   8 90.4143 23.1678   2 
  -7   1   8 54.7108 19.6770   2 
  -7   1   8 78.0227 14.2535   3 
   7   1  -8 77.6436 22.0471   1 
   5  -1  -8 797.361 48.0270   1 
  -5  -1   8 814.273 47.8269   2 
  -5   1   8 790.319 42.5426   3 
   5   1  -8 790.049 40.5139   3 
   5   1  -8 797.136 45.8460   1 
  -5   1   8 691.051 42.7357   2 
   3  -1  -8 17.2912 15.2593   1 
  -3  -1   8 29.8507 16.1030   2 
   3   1  -8 11.6575 13.7787   1 
  -3   1   8 29.7700 10.8634   2 
   3   1  -8 21.1937 9.24043   3 
  -3   1   8 20.5168 10.9714   3 
   1  -1  -8 504.703 31.8454   1 
  -1  -1   8 524.679 34.8335   2 
   1   1  -8 426.236 27.9921   3 
  -1   1   8 465.515 25.8691   2 
   1   1  -8 469.288 28.7768   1 
  -1   1   8 360.117 29.7242   3 
   1  -1   8 106.298 20.9191   2 
  -1  -1  -8 104.667 18.5855   1 
  -1   1  -8 81.9117 14.9494   1 
  -1   1  -8 114.603 16.2149   3 
   1   1   8 127.531 18.6232   3 
   1   1   8 104.409 15.5838   2 
  -3  -1  -8 343.908 28.8825   1 
  -3  -1  -8 343.072 24.2721   2 
  -3   1  -8 376.746 28.2127   2 
  -3   1  -8 398.379 27.4205   3 
  -3   1  -8 321.591 26.4030   1 
   3   1   8 352.654 29.2364   3 
  -5  -1  -8 158.148 22.9198   2 
  -5  -1  -8 114.387 21.6507   1 
  -5   1  -8 131.238 21.0784   1 
  -5   1  -8 137.234 24.3727   2 
   5   1   8 115.090 19.7810   3 
  -5   1  -8 165.274 21.1817   3 
  -7  -1  -8 480.259 39.2305   2 
  -7  -1  -8 537.473 41.4628   1 
   7  -1   8 554.644 40.6301   1 
   7   1   8 443.425 34.3070   3 
  -7   1  -8 470.736 41.7173   2 
  -7   1  -8 493.339 32.7519   3 
   9  -1   8 8.44060 15.8208   1 
  -9  -1  -8 -11.092 17.2374   2 
   9   1   8 8.07917 16.0296   1 
  -9   1  -8 -6.2726 19.6686   2 
 -11  -1  -8 -1.1871 21.0022   2 
  11  -1   8 45.1168 22.9632   1 
 -11   1  -8 50.3797 28.4443   2 
  11   1   8 29.3322 24.6265   1 
 -14  -2   8 103.205 31.6128   2 
  14  -2  -8 29.9529 33.9055   1 
 -14   2   8 113.384 36.3662   2 
  14   2  -8 99.8469 33.4210   1 
  12  -2  -8 24.7549 27.1289   1 
 -12  -2   8 28.0424 24.2024   2 
 -12   2   8 -28.067 18.0338   2 
  12   2  -8 -18.305 21.7134   1 
 -10  -2   8 91.8943 28.4987   2 
  10  -2  -8 64.9607 26.5799   1 
  10   2  -8 59.6691 24.3332   1 
 -10   2   8 114.763 29.7965   2 
   8  -2  -8 98.5514 28.2429   1 
  -8  -2   8 115.255 28.7730   2 
  -8   2   8 112.808 15.6773   3 
   8   2  -8 117.075 25.0325   1 
  -8   2   8 84.4008 22.1537   2 
  -6  -2   8 231.351 31.8819   2 
   6  -2  -8 180.187 29.7463   1 
  -6   2   8 172.731 21.6456   2 
   6   2  -8 177.002 16.7795   3 
  -6   2   8 178.613 19.2657   3 
  -4  -2   8 463.012 36.9792   2 
   4  -2  -8 453.153 38.0652   1 
  -4   2   8 500.665 29.1819   2 
  -4   2   8 497.547 32.2115   3 
   4   2  -8 500.363 33.6889   1 
   4   2  -8 483.853 29.0707   3 
  -2  -2   8 262.724 31.3806   2 
   2  -2  -8 267.287 25.6728   1 
   2   2  -8 272.933 21.1131   3 
  -2   2   8 223.534 22.5179   3 
   2   2  -8 276.795 21.8703   1 
   0  -2   8 248.629 28.7086   2 
   0  -2  -8 212.107 23.2834   1 
   0   2  -8 245.358 20.4987   3 
   0   2  -8 222.321 18.5029   1 
   0   2   8 234.652 22.9684   3 
  -2  -2  -8 840.809 48.6824   1 
   2  -2   8 849.309 51.9811   2 
  -2  -2  -8 846.468 40.1476   2 
  -2   2  -8 853.706 45.8580   3 
   2   2   8 915.512 49.3827   3 
  -2   2  -8 867.213 44.0633   1 
  -4  -2  -8 48.2097 17.4897   1 
  -4  -2  -8 65.2647 13.0134   2 
   4   2   8 51.3223 14.7075   3 
  -4   2  -8 60.7009 14.6985   3 
  -4   2  -8 64.1566 14.9836   1 
  -4   2  -8 37.8257 16.4683   2 
  -6  -2  -8 377.660 31.8665   2 
  -6  -2  -8 354.585 33.8187   1 
   6   2   8 414.539 31.7313   3 
  -6   2  -8 350.717 36.0856   2 
  -6   2  -8 374.294 29.0468   3 
  -8  -2  -8 242.216 31.3878   2 
   8  -2   8 303.711 38.2852   1 
  -8  -2  -8 272.058 36.3905   1 
  -8   2  -8 195.256 22.9701   3 
  -8   2  -8 238.571 38.1125   2 
   8   2   8 239.101 27.0945   3 
  10  -2   8 -9.6510 16.1660   1 
 -10  -2  -8 -12.030 18.2293   2 
 -10   2  -8 12.9262 24.9397   2 
  10   2   8 31.6576 20.0661   1 
  13  -3  -8 -6.2178 28.3919   1 
 -13  -3   8 21.1919 23.2046   2 
  13   3  -8 27.7727 26.5502   1 
 -13   3   8 25.9752 27.2107   2 
 -11  -3   8 -37.889 15.1997   2 
  11  -3  -8 8.00897 27.0667   1 
 -11   3   8 -4.7520 21.6758   2 
  11   3  -8 -8.8132 20.6371   1 
   9  -3  -8 42.5814 25.2518   1 
  -9  -3   8 25.9215 21.3075   2 
   9   3  -8 17.3108 10.4178   3 
  -9   3   8 18.5373 10.6393   3 
  -9   3   8 18.8985 18.9253   2 
   9   3  -8 11.7285 18.0482   1 
  -7  -3   8 69.5120 25.0747   2 
   7  -3  -8 79.1430 26.5894   1 
  -7   3   8 37.8634 17.0307   2 
   7   3  -8 79.9260 20.5514   1 
  -7   3   8 47.2192 12.9513   3 
   7   3  -8 43.9541 12.0094   3 
   5  -3  -8 150.149 27.5426   1 
  -5  -3   8 195.342 31.6023   2 
  -5   3   8 149.008 21.0437   3 
   5   3  -8 211.390 23.7791   1 
   5   3  -8 189.093 17.5200   3 
  -5   3   8 141.411 17.8483   2 
   3  -3  -8 -1.0165 15.1895   1 
  -3  -3   8 10.8848 21.1516   2 
  -3   3   8 17.5843 12.1158   3 
   3   3  -8 18.0565 13.0076   1 
   3   3  -8 9.73965 8.57748   3 
  -3   3   8 8.46509 6.67283   2 
  -1  -3   8 356.060 37.3918   2 
   1  -3  -8 299.248 27.9532   1 
   1   3  -8 316.199 23.7651   3 
  -1   3   8 356.688 26.7924   3 
   1   3  -8 336.462 21.8254   1 
  -1  -3  -8 153.637 23.2000   1 
   1  -3   8 231.613 31.3368   2 
   1   3   8 161.514 21.7631   3 
  -1   3  -8 187.969 18.9516   3 
  -1   3  -8 179.146 15.8755   1 
   3  -3   8 46.0969 25.0498   2 
  -3  -3  -8 33.6594 9.47059   2 
  -3  -3  -8 52.7689 17.1572   1 
  -3   3  -8 47.8807 12.6893   1 
   3   3   8 49.3215 15.1791   3 
  -3   3  -8 69.3928 14.3287   3 
   5  -3   8 151.905 22.0306   1 
  -5  -3  -8 149.261 22.6253   2 
  -5  -3  -8 116.740 24.3193   1 
  -5   3  -8 154.933 21.8754   3 
  -5   3  -8 157.237 28.3175   2 
   5   3   8 149.476 22.3243   3 
  -7  -3  -8 143.995 28.5827   1 
  -7  -3  -8 126.475 24.7404   2 
   7  -3   8 150.047 26.7509   1 
  -7   3  -8 133.287 20.4417   3 
   7   3   8 124.808 20.5028   3 
  -7   3  -8 144.977 31.3527   2 
  -9  -3  -8 1.56387 18.3054   2 
   9  -3   8 -9.1586 16.4533   1 
  -9   3  -8 37.4462 24.1770   2 
  11  -3   8 40.2946 22.3406   1 
 -11  -3  -8 25.9524 23.6159   2 
  11   3   8 61.7706 26.5889   1 
 -11   3  -8 99.4227 36.4404   2 
  12  -4  -8 32.6473 32.2946   1 
 -12  -4   8 23.5926 24.3641   2 
 -12   4   8 -7.4309 22.0487   2 
  12   4  -8 -24.051 20.3357   1 
 -10  -4   8 57.8406 25.6230   2 
  10  -4  -8 65.5922 30.7786   1 
 -10   4   8 104.566 27.9463   2 
  10   4  -8 10.4812 19.6461   1 
   8  -4  -8 392.215 46.2761   1 
  -8  -4   8 471.494 45.3476   2 
  -8   4   8 412.656 29.5793   3 
  -8   4   8 468.215 37.4632   2 
   8   4  -8 462.116 38.6050   1 
   8   4  -8 430.367 27.7205   3 
  -6  -4   8 -24.310 21.3230   2 
   6  -4  -8 14.3275 22.3953   1 
  -6   4   8 33.1303 12.3493   3 
  -6   4   8 4.18917 13.7023   2 
   6   4  -8 3.25375 8.55125   3 
   6   4  -8 49.4787 17.5013   1 
  -4  -4   8 389.292 40.1092   2 
   4  -4  -8 362.026 35.7260   1 
   4   4  -8 376.385 28.2335   1 
  -4   4   8 369.615 28.4915   3 
   4   4  -8 425.829 27.4636   3 
  -4   4   8 328.219 23.0589   2 
  -2  -4   8 313.871 40.6058   2 
   2  -4  -8 296.036 28.8322   1 
  -2   4   8 318.032 26.5150   3 
   2   4  -8 315.225 21.1476   1 
   2   4  -8 292.346 23.5080   3 
   0  -4  -8 118.305 21.3697   1 
   0  -4   8 92.3189 30.0357   2 
   0   4  -8 84.7306 11.2915   1 
   0   4   8 86.2868 18.0775   3 
   0   4  -8 87.6991 15.1393   3 
   2  -4   8 172.517 33.3499   2 
  -2  -4  -8 161.466 12.8238   2 
  -2  -4  -8 196.086 26.7881   1 
   2   4   8 193.975 22.8013   3 
  -2   4  -8 190.751 16.0335   1 
  -2   4  -8 193.730 20.6816   3 
  -4  -4  -8 58.9870 13.2255   2 
  -4  -4  -8 56.3962 18.9676   1 
   4  -4   8 36.7822 12.7081   1 
  -4   4  -8 30.8168 14.4413   3 
   4   4   8 42.7326 14.7288   3 
  -6  -4  -8 -17.352 10.3937   2 
  -6  -4  -8 17.4764 16.3730   1 
   6  -4   8 1.22813 12.5900   1 
  -6   4  -8 -7.3620 18.9446   2 
  -6   4  -8 13.5735 13.4028   3 
   6   4   8 19.4587 13.9530   3 
  -8  -4  -8 469.105 40.2389   2 
   8  -4   8 483.179 39.2873   1 
  -8  -4  -8 448.029 41.5381   1 
   8   4   8 453.920 33.9137   3 
  -8   4  -8 395.966 32.5131   3 
  -8   4  -8 407.146 46.7607   2 
 -10  -4  -8 86.4614 27.4327   2 
  10  -4   8 107.556 26.4025   1 
 -10   4  -8 50.8029 28.4756   2 
  10   4   8 83.1481 26.9248   1 
 -13  -5   8 1.27600 22.8900   2 
  13  -5  -8 -69.103 31.3499   1 
  13   5  -8 24.7157 26.1589   1 
 -13   5   8 -13.380 27.2059   2 
  11  -5  -8 -33.661 29.7154   1 
 -11  -5   8 -1.4160 22.9460   2 
  11   5  -8 -21.489 19.0271   1 
 -11   5   8 -14.910 21.9022   2 
   9  -5  -8 90.9173 34.0345   1 
   9   5  -8 145.196 27.4909   1 
  -9   5   8 127.719 28.9281   2 
  -9   5   8 161.516 20.1151   3 
   9   5  -8 156.521 17.8070   3 
   7  -5  -8 30.7090 27.3558   1 
  -7  -5   8 2.66528 24.6621   2 
  -7   5   8 10.6343 13.7203   3 
  -7   5   8 20.2234 18.4285   2 
   7   5  -8 26.0966 11.1746   3 
   7   5  -8 14.1401 18.0502   1 
   5  -5  -8 187.819 33.2218   1 
  -5  -5   8 179.523 35.7540   2 
  -5   5   8 208.793 22.7831   3 
  -5   5   8 210.444 22.2637   2 
   5   5  -8 236.506 21.3972   3 
   5   5  -8 189.300 23.4245   1 
   3  -5  -8 43.3016 9.47334   2 
  -3  -5   8 28.8241 31.0236   2 
   3  -5  -8 19.8795 18.2662   1 
  -3   5   8 22.2332 14.1275   3 
   3   5  -8 33.7853 12.8132   1 
   3   5  -8 6.32210 9.77129   3 
   1  -5  -8 127.920 23.2246   1 
  -1  -5   8 189.376 39.8482   2 
  -1   5   8 163.428 22.4146   3 
   1   5  -8 150.684 11.7347   1 
   1   5  -8 157.816 19.9480   3 
   1  -5   8 55.9785 29.4103   2 
  -1  -5  -8 30.3338 18.0248   1 
  -1   5  -8 38.7437 13.4249   3 
   1   5   8 60.1544 17.0320   3 
  -1   5  -8 49.4458 8.03951   1 
  -3  -5  -8 271.701 30.1213   1 
  -3  -5  -8 283.468 20.7442   2 
   3  -5   8 262.258 20.6189   1 
   3  -5   8 225.327 40.2746   2 
  -3   5  -8 258.865 25.1205   3 
   3   5   8 303.512 28.4277   3 
  -5  -5  -8 297.009 33.2379   1 
  -5  -5  -8 302.516 26.6308   2 
   5  -5   8 260.946 25.2118   1 
   5   5   8 301.931 29.0866   3 
  -5   5  -8 261.384 26.7375   3 
  -7  -5  -8 459.468 38.4115   2 
  -7  -5  -8 433.548 40.7725   1 
   7  -5   8 461.287 36.5138   1 
  -7   5  -8 446.065 47.5207   2 
   7   5   8 489.181 36.1490   3 
  -7   5  -8 452.391 35.3319   3 
   9  -5   8 87.3217 21.8800   1 
  -9  -5  -8 16.7999 20.0057   2 
  -9  -5  -8 30.4294 21.9252   1 
  -9   5  -8 -5.0397 24.6964   2 
  12  -6  -8 -36.051 33.0201   1 
 -12  -6   8 8.33392 24.9430   2 
  12   6  -8 3.93709 21.9641   1 
 -12   6   8 -8.3511 26.1394   2 
  10  -6  -8 2.07291 30.3736   1 
 -10  -6   8 34.5841 26.3321   2 
 -10   6   8 2.61972 23.6799   2 
  10   6  -8 31.1497 20.5681   1 
   8  -6  -8 122.035 34.7844   1 
  -8  -6   8 125.937 33.3508   2 
  -8   6   8 140.258 28.4181   2 
   8   6  -8 109.314 16.4801   3 
   8   6  -8 115.211 24.6300   1 
  -8   6   8 112.431 22.1849   3 
  -6  -6   8 1.91567 26.8815   2 
   6  -6  -8 65.3068 30.1478   1 
   6   6  -8 18.8793 11.1661   3 
  -6   6   8 9.60151 16.8687   2 
   6   6  -8 2.46858 15.9679   1 
  -6   6   8 8.02117 15.6486   3 
  -4  -6   8 167.322 40.2435   2 
   4   6  -8 207.451 23.3789   1 
  -4   6   8 258.699 27.5764   3 
   4   6  -8 249.571 23.8569   3 
   2  -6  -8 264.151 32.1091   1 
  -2  -6   8 272.619 45.6547   2 
   2   6  -8 273.366 25.0033   3 
  -2   6   8 266.847 28.1837   3 
   0  -6   8 25.8537 33.9344   2 
   0  -6  -8 26.8285 17.3089   1 
   0   6   8 8.03278 15.3195   3 
   0   6  -8 22.0541 12.6220   3 
  -2  -6  -8 646.165 32.6952   2 
  -2  -6  -8 563.052 44.4230   1 
   2  -6   8 578.565 58.5552   2 
   2   6   8 704.639 44.7727   3 
  -2   6  -8 676.451 41.9885   3 
   4  -6   8 87.1033 33.5925   2 
   4  -6   8 110.361 16.0924   1 
  -4  -6  -8 139.085 26.6742   1 
  -4  -6  -8 131.341 19.1781   2 
   4   6   8 144.739 23.9950   3 
  -4   6  -8 142.561 22.5946   3 
   6  -6   8 -6.5580 11.9648   1 
  -6  -6  -8 29.1194 18.1503   1 
   6  -6   8 34.6091 29.9142   2 
  -6  -6  -8 45.1395 16.7801   2 
   6   6   8 14.5199 15.2299   3 
  -6   6  -8 26.6235 16.8788   3 
  -8  -6  -8 353.425 37.8235   2 
  -8  -6  -8 319.780 38.4911   1 
   8   6   8 307.785 31.9897   3 
  -8   6  -8 297.921 48.2506   2 
  -8   6  -8 311.034 29.7788   3 
  10   6   8 -1.9397 16.5528   1 
 -10   6  -8 -31.330 29.5761   2 
 -11  -7   8 39.7761 29.5676   2 
  11  -7  -8 -24.439 32.0528   1 
 -11   7   8 11.7055 27.9157   2 
  11   7  -8 10.3380 22.2770   1 
  -9  -7   8 49.8496 29.9679   2 
   9  -7  -8 39.4449 33.3717   1 
   9   7  -8 37.3055 13.2513   3 
  -9   7   8 68.7157 20.1726   3 
  -9   7   8 36.0704 25.1980   2 
   9   7  -8 42.5260 21.3883   1 
  -7  -7   8 7.60267 24.8998   2 
   7  -7  -8 7.58442 28.3112   1 
  -7   7   8 33.6977 17.1937   3 
   7   7  -8 -5.1635 15.4586   1 
  -7   7   8 22.0306 22.0062   2 
   7   7  -8 9.03776 10.7014   3 
  -5  -7   8 119.594 36.3239   2 
   5  -7  -8 151.314 32.2620   1 
  -5   7   8 190.487 25.3646   3 
   5   7  -8 131.118 19.0621   3 
   5   7  -8 93.0543 19.8550   1 
   3  -7  -8 29.1346 22.1789   1 
  -3  -7   8 27.7485 37.5185   2 
   3  -7  -8 18.5102 19.2292   2 
   3   7  -8 35.8390 14.3515   3 
  -3   7   8 44.9429 18.8149   3 
   1  -7  -8 79.1150 23.6810   1 
  -1  -7   8 43.4010 39.0053   2 
   1   7  -8 95.4828 18.3385   3 
  -1   7   8 111.398 22.5012   3 
   1  -7   8 142.629 42.3484   2 
  -1  -7  -8 158.191 28.5577   1 
  -1   7  -8 190.589 24.9709   3 
   1   7   8 158.242 26.2879   3 
  -3  -7  -8 108.809 25.3301   1 
   3  -7   8 133.746 40.7270   2 
   3   7   8 109.290 23.2171   3 
  -3   7  -8 91.0391 20.9345   3 
   5  -7   8 45.3148 31.7563   2 
  -5  -7  -8 25.5244 18.9694   1 
  -5   7  -8 36.1099 17.8384   3 
   5   7   8 -5.1173 15.0275   3 
  -7  -7  -8 92.3278 26.9521   1 
   7  -7   8 118.232 38.1790   2 
  -7   7  -8 94.6275 22.0685   3 
   7   7   8 63.0124 21.0848   3 
  -9  -7  -8 -2.0576 20.7578   1 
  -9   7  -8 -33.695 25.9902   2 
  10  -8  -8 13.9074 33.7710   1 
 -10  -8   8 65.1411 30.9271   2 
 -10   8   8 9.85768 28.7610   2 
  10   8  -8 -18.019 19.0115   1 
   8  -8  -8 58.8444 33.4776   1 
  -8  -8   8 44.5669 29.2394   2 
  -8   8   8 43.3356 27.3723   2 
   8   8  -8 45.4082 14.4323   3 
  -8   8   8 44.6108 18.7756   3 
   6  -8  -8 13.2917 25.3632   1 
  -6  -8   8 17.8528 28.3367   2 
  -6   8   8 -4.3439 16.5310   3 
   6   8  -8 24.8186 13.8993   3 
  -4  -8   8 21.7457 33.9642   2 
   4  -8  -8 70.4292 25.5900   1 
   4   8  -8 71.9709 16.8741   3 
  -4   8   8 34.8038 18.8059   3 
  -2  -8   8 43.2252 40.0504   2 
   2  -8  -8 18.9120 20.8857   1 
   2   8  -8 22.3964 13.7650   3 
  -2   8   8 33.9935 20.2888   3 
   0  -8  -8 16.5554 19.3037   1 
   0  -8   8 12.1616 37.9902   2 
   0   8   8 28.1591 18.8558   3 
   0   8  -8 30.1395 15.4217   3 
  -2  -8  -8 165.496 30.2966   1 
   2  -8   8 116.243 41.7084   2 
  -2   8  -8 137.335 23.7327   3 
   2   8   8 147.633 27.0346   3 
   4  -8   8 98.8479 38.3901   2 
  -4  -8  -8 99.1720 25.0450   1 
  -4   8  -8 91.5905 21.4600   3 
   4   8   8 91.3185 22.7387   3 
  -6  -8  -8 16.3944 20.3433   1 
   6  -8   8 26.6859 31.1320   2 
  -6   8  -8 0.71742 16.5974   3 
   6   8   8 4.22290 16.7433   3 
   8  -8   8 201.868 48.9975   2 
  -8  -8  -8 181.115 35.1634   1 
  -8   8  -8 203.808 28.5992   3 
 -11  -9   8 15.7597 29.3946   2 
 -11   9   8 -38.406 45.7817   2 
   9  -9  -8 81.3195 38.2340   1 
  -9  -9   8 69.8417 31.8066   2 
  -9   9   8 71.1438 24.9691   3 
  -9   9   8 28.0900 35.0215   2 
   7  -9  -8 18.0346 29.6462   1 
  -7  -9   8 37.2961 32.7670   2 
   7   9  -8 24.3672 13.7869   3 
  -7   9   8 16.4860 17.8971   3 
  -5  -9   8 37.9522 32.7784   2 
   5  -9  -8 38.0820 25.3488   1 
   5   9  -8 43.5864 15.5160   3 
  -5   9   8 42.4591 21.1598   3 
   3  -9  -8 27.1266 21.8665   1 
  -3  -9   8 29.5844 37.4366   2 
   3   9  -8 39.1452 16.6590   3 
  -3   9   8 24.4597 19.7441   3 
  -1  -9   8 1.93111 36.9481   2 
   1  -9  -8 7.20346 19.8232   1 
  -1   9   8 24.2104 19.0413   3 
   1   9  -8 3.04733 14.2059   3 
   1  -9   8 -3.7218 37.8308   2 
  -1  -9  -8 21.4181 19.6968   1 
  -1   9  -8 23.6962 17.3951   3 
   1   9   8 57.5707 22.5783   3 
   3  -9   8 24.3464 36.9699   2 
  -3  -9  -8 1.60588 16.8691   1 
  -3   9  -8 24.3894 17.4559   3 
   3   9   8 5.42640 18.3454   3 
   5  -9   8 -19.542 34.0119   2 
  -5  -9  -8 4.56059 18.4489   1 
  -5   9  -8 -19.547 17.7465   3 
   5   9   8 18.2504 16.8862   3 
   7  -9   8 81.8311 40.0955   2 
  -7  -9  -8 78.4479 28.9168   1 
   7   9   8 55.3852 21.6684   3 
  -7   9  -8 45.1650 21.4862   3 
 -10 -10   8 87.1934 36.2725   2 
  -8 -10   8 -38.747 24.9338   2 
   8 -10  -8 50.6845 33.0852   1 
  -8  10   8 11.5643 21.2203   3 
   8  10  -8 -2.6461 14.3057   3 
   6 -10  -8 15.0628 26.2764   1 
  -6 -10   8 3.50605 29.9318   2 
   6  10  -8 17.3614 14.5550   3 
  -6  10   8 -30.116 16.1881   3 
   4 -10  -8 83.9428 27.9698   1 
  -4 -10   8 44.2837 39.2201   2 
   4  10  -8 74.3812 20.8734   3 
  -4  10   8 89.5435 24.9435   3 
  -2 -10   8 20.0703 43.3088   2 
   2 -10  -8 53.2085 23.9908   1 
  -2  10   8 50.7798 23.8620   3 
   2  10  -8 22.3766 17.1877   3 
   0 -10  -8 19.5073 20.5447   1 
   0 -10   8 -42.139 40.4610   2 
   0  10  -8 27.8693 18.1635   3 
   0  10   8 15.3073 20.5304   3 
  -2 -10  -8 16.3824 20.2575   1 
   2 -10   8 26.3368 42.6759   2 
   2  10   8 38.1641 21.9000   3 
  -2  10  -8 48.8711 20.8624   3 
   4 -10   8 2.14531 38.9137   2 
  -4 -10  -8 10.1331 20.1878   1 
   4  10   8 15.8497 20.3007   3 
  -4  10  -8 -32.460 16.3162   3 
  -6 -10  -8 57.9849 25.3997   1 
   6 -10   8 23.3747 41.6487   2 
   6  10   8 1.31995 19.1173   3 
  -6  10  -8 65.7381 22.5089   3 
  -7 -11   8 31.6220 32.1659   2 
   7 -11  -8 35.7988 30.9264   1 
  -7  11   8 -16.643 19.4917   3 
   7  11  -8 -14.818 12.4986   3 
  -5 -11   8 25.8548 34.8028   2 
   5 -11  -8 2.15104 23.9827   1 
  -5  11   8 33.5168 24.1077   3 
   5  11  -8 9.81435 17.0098   3 
  -3 -11   8 29.5721 39.9315   2 
   3 -11  -8 1.39413 21.3586   1 
  -3  11   8 -24.071 20.9078   3 
   3  11  -8 -10.213 15.8360   3 
   1 -11  -8 4.40275 19.7824   1 
  -1 -11   8 -58.090 39.1911   2 
   1  11  -8 9.86086 18.7999   3 
  -1  11   8 32.7993 22.1414   3 
   1 -11   8 76.2559 49.1005   2 
  -1 -11  -8 105.457 28.1744   1 
   1  11   8 69.5732 25.7373   3 
  -1  11  -8 79.3814 24.8464   3 
   3 -11   8 36.2224 47.3621   2 
  -3 -11  -8 10.2522 20.8399   1 
  -3  11  -8 90.6876 24.8389   3 
   3  11   8 56.0497 23.9341   3 
  -5 -11  -8 37.4487 23.4889   1 
   5 -11   8 -103.46 38.1729   2 
  -5  11  -8 -5.1200 22.5709   3 
   5  11   8 12.8914 19.3086   3 
   6 -12  -8 1.73059 26.3542   1 
  -6 -12   8 47.6455 33.6418   2 
  -6  12   8 -21.437 19.1262   3 
   6  12  -8 -7.7002 15.1117   3 
  -4 -12   8 1.63697 42.7231   2 
   4 -12  -8 74.8017 30.3695   1 
  -4  12   8 14.2534 23.8176   3 
   4  12  -8 35.8039 20.3426   3 
   2 -12  -8 19.2340 21.5754   1 
  -2 -12   8 -13.168 43.3991   2 
  -2  12   8 -11.851 20.0194   3 
   2  12  -8 1.75473 18.6533   3 
   0 -12   8 28.1766 49.6488   2 
   0 -12  -8 17.2693 21.2451   1 
   0  12  -8 -0.4798 20.3564   3 
   0  12   8 11.1696 20.9373   3 
  -2 -12  -8 69.0036 24.5753   1 
   2 -12   8 -39.799 45.7257   2 
  -2  12  -8 117.013 28.4263   3 
   2  12   8 58.3047 26.1760   3 
   4 -12   8 -27.650 50.7940   2 
  -4 -12  -8 25.6168 23.2573   1 
   4  12   8 16.8792 23.5517   3 
  -4  12  -8 -10.570 23.7819   3 
  -3 -13   8 81.2787 50.8479   2 
   3 -13  -8 67.6789 28.5822   1 
  -3  13   8 17.8679 27.7783   3 
   3  13  -8 2.30438 20.9439   3 
  -1 -13   8 -46.995 50.0647   2 
   1 -13  -8 21.8848 24.7835   1 
   1  13  -8 -13.471 19.0661   3 
  -1  13   8 17.9660 26.3721   3 
  -1 -13  -8 59.8905 25.7219   1 
   1 -13   8 -51.111 47.8555   2 
   1  13   8 20.2823 27.0463   3 
  -1  13  -8 44.6245 25.1433   3 
 -14   0   9 328.277 52.0229   2 
  14   0  -9 149.266 41.8861   1 
  12   0  -9 -59.978 21.1832   1 
 -12   0   9 10.2120 24.3527   2 
 -10   0   9 257.551 38.1894   2 
  10   0  -9 162.979 33.9224   1 
   8   0  -9 219.934 33.6102   1 
  -8   0   9 207.952 20.1985   3 
  -8   0   9 261.861 35.2849   2 
   6   0  -9 165.201 28.3236   1 
  -6   0   9 129.272 20.5089   3 
  -6   0   9 146.828 25.3783   2 
   4   0  -9 699.911 44.3990   1 
  -4   0   9 652.080 39.7217   2 
  -2   0   9 72.5705 17.1215   2 
   2   0  -9 53.7875 15.5937   1 
   2   0  -9 78.4929 13.6462   3 
   0   0   9 354.941 30.1529   2 
   0   0  -9 389.860 29.9250   1 
   0   0  -9 374.626 26.6141   3 
   2   0   9 2689.50 118.679   2 
  -2   0  -9 2676.03 118.623   1 
  -2   0  -9 2760.77 117.298   3 
  -4   0  -9 166.005 24.0902   2 
  -4   0  -9 165.903 24.3693   1 
  -6   0  -9 550.725 41.7831   2 
  -6   0  -9 601.187 42.6951   1 
   6   0   9 549.801 40.7560   3 
   8   0   9 296.261 34.8669   1 
   8   0   9 249.092 28.6979   3 
  -8   0  -9 314.635 36.5550   2 
 -10   0  -9 17.2761 22.1926   2 
  10   0   9 7.77046 18.2411   1 
 -13  -1   9 71.2282 27.5723   2 
  13  -1  -9 12.8046 28.8565   1 
  13   1  -9 2.85254 27.4199   1 
 -13   1   9 55.5993 30.2767   2 
 -11  -1   9 35.1449 25.5122   2 
  11  -1  -9 -19.109 24.3660   1 
 -11   1   9 9.96122 20.6470   2 
  11   1  -9 19.8528 25.0742   1 
   9  -1  -9 186.933 33.4453   1 
  -9  -1   9 236.333 20.8689   3 
  -9  -1   9 257.632 37.5315   2 
  -9   1   9 231.243 19.7256   3 
   9   1  -9 212.847 33.4293   1 
  -9   1   9 249.506 29.4294   2 
   7  -1  -9 312.125 36.1325   1 
  -7  -1   9 278.703 32.4006   2 
  -7  -1   9 276.978 24.4965   3 
  -7   1   9 270.934 23.3609   3 
   7   1  -9 259.610 33.6426   1 
  -7   1   9 281.322 29.6403   2 
   5  -1  -9 60.5884 21.5287   1 
  -5  -1   9 63.6667 19.9896   2 
   5   1  -9 115.543 23.0236   1 
  -5   1   9 86.4381 16.8883   3 
  -5   1   9 90.4486 18.5048   2 
   5   1  -9 68.9615 13.4013   3 
  -3  -1   9 1003.15 53.3854   2 
   3  -1  -9 984.483 54.1766   1 
   3   1  -9 1019.82 52.8820   1 
   3   1  -9 963.805 49.2041   3 
  -3   1   9 943.358 46.9366   2 
  -3   1   9 938.068 51.8503   3 
  -1  -1   9 138.042 24.1844   2 
   1  -1  -9 166.637 23.3946   1 
  -1   1   9 103.544 19.0630   3 
   1   1  -9 175.111 20.9265   1 
  -1   1   9 122.463 15.9166   2 
   1   1  -9 149.644 17.0943   3 
  -1  -1  -9 803.392 47.1928   1 
   1  -1   9 807.664 48.7120   2 
   1   1   9 789.184 42.3459   2 
  -1   1  -9 833.316 45.0395   3 
  -1   1  -9 837.990 44.7306   1 
   1   1   9 897.879 49.5609   3 
  -3  -1  -9 1.34593 13.0617   1 
  -3  -1  -9 15.5315 9.40584   2 
   3   1   9 24.3450 13.6777   3 
  -3   1  -9 -5.2960 12.1435   1 
  -3   1  -9 29.9614 12.9470   3 
  -3   1  -9 20.2156 12.8681   2 
  -5  -1  -9 242.791 30.4013   1 
  -5  -1  -9 170.312 25.2281   2 
  -5   1  -9 216.521 24.4841   1 
  -5   1  -9 221.716 30.0262   2 
   5   1   9 191.990 25.7877   3 
  -5   1  -9 204.994 23.3712   3 
  -7  -1  -9 112.660 25.1680   1 
  -7  -1  -9 128.852 25.7758   2 
   7   1   9 66.5247 18.7823   3 
  -7   1  -9 90.7440 26.0077   2 
  -9  -1  -9 12.9336 18.5733   2 
   9  -1   9 26.6915 17.5358   1 
  -9   1  -9 11.9580 20.4958   2 
   9   1   9 10.1927 18.7695   1 
  11  -1   9 51.1849 25.5189   1 
 -11  -1  -9 91.5535 30.5502   2 
  11   1   9 94.6978 30.4757   1 
 -11   1  -9 41.5772 29.4285   2 
 -14  -2   9 60.6374 28.3788   2 
  14   2  -9 11.9358 29.6314   1 
 -14   2   9 0.84532 26.9788   2 
 -12  -2   9 31.4568 26.5434   2 
  12  -2  -9 -10.475 27.1905   1 
  12   2  -9 25.2402 26.8002   1 
 -12   2   9 46.6259 24.3543   2 
 -10  -2   9 164.833 33.3047   2 
  10  -2  -9 75.6451 30.6397   1 
 -10   2   9 172.572 31.0331   2 
  10   2  -9 106.011 29.0337   1 
   8  -2  -9 101.545 29.8575   1 
  -8  -2   9 86.2568 26.7033   2 
  -8   2   9 113.936 25.4251   2 
   8   2  -9 98.3966 26.0996   1 
  -8   2   9 104.940 16.8056   3 
   6  -2  -9 97.2638 26.5304   1 
  -6  -2   9 65.1635 23.5231   2 
  -6   2   9 106.904 20.5817   2 
  -6   2   9 98.5955 17.4372   3 
   6   2  -9 88.1565 14.7891   3 
   6   2  -9 110.566 23.0840   1 
   4  -2  -9 2076.84 101.917   1 
  -4  -2   9 2130.19 101.690   2 
  -4   2   9 2258.07 98.1661   3 
   4   2  -9 2169.12 97.6268   1 
   4   2  -9 2260.50 95.2220   3 
  -4   2   9 2130.17 92.6127   2 
  -2  -2   9 34.5243 21.9476   2 
   2  -2  -9 22.3265 14.8043   1 
   2   2  -9 22.4526 10.3878   3 
   2   2  -9 17.6750 12.7672   1 
  -2   2   9 0.15613 12.4842   3 
   0  -2  -9 7.78757 12.8351   1 
   0  -2   9 4.39950 19.7925   2 
   0   2  -9 27.7167 10.8997   1 
   0   2  -9 4.50197 9.21699   3 
   0   2   9 19.7433 12.7066   3 
   2  -2   9 1484.18 77.9329   2 
  -2  -2  -9 1431.86 63.8958   2 
  -2  -2  -9 1466.24 74.2689   1 
  -2   2  -9 1533.26 71.2480   3 
  -2   2  -9 1474.95 69.1348   1 
   2   2   9 1509.25 74.1885   3 
  -4  -2  -9 125.690 18.5248   2 
  -4  -2  -9 166.946 27.5276   1 
  -4   2  -9 180.797 22.7372   3 
   4   2   9 132.632 21.6118   3 
  -4   2  -9 147.966 20.8962   1 
  -4   2  -9 127.887 24.3845   2 
  -6  -2  -9 456.509 35.4222   2 
  -6  -2  -9 435.935 37.5493   1 
  -6   2  -9 398.982 40.2072   2 
   6   2   9 449.043 34.8200   3 
  -6   2  -9 465.531 34.8538   1 
  -6   2  -9 471.209 33.8809   3 
   8  -2   9 127.117 27.3407   1 
  -8  -2  -9 104.258 26.2161   1 
  -8  -2  -9 116.663 27.1923   2 
  -8   2  -9 114.098 30.8035   2 
  -8   2  -9 101.039 18.5957   3 
   8   2   9 99.6722 20.1154   3 
  10  -2   9 47.3823 23.9276   1 
 -10  -2  -9 41.2791 24.6357   2 
  10   2   9 29.0125 19.1383   1 
 -10   2  -9 52.8314 28.6138   2 
  13  -3  -9 -30.630 30.4691   1 
 -13  -3   9 54.8968 30.9955   2 
 -13   3   9 53.4291 30.4495   2 
  13   3  -9 -39.490 24.8920   1 
  11  -3  -9 -62.053 25.1069   1 
 -11  -3   9 1.65298 21.6010   2 
 -11   3   9 37.7899 25.8015   2 
  11   3  -9 -29.986 21.7616   1 
   9  -3  -9 -24.932 24.3373   1 
  -9  -3   9 27.4354 22.0710   2 
  -9   3   9 31.0564 12.9243   3 
   9   3  -9 -18.499 18.7841   1 
  -9   3   9 17.3698 17.7921   2 
   9   3  -9 7.40649 10.2226   3 
   7  -3  -9 13.0401 24.7517   1 
  -7  -3   9 -4.9327 21.2581   2 
   7   3  -9 1.43206 9.98642   3 
   7   3  -9 24.5224 19.5085   1 
  -7   3   9 -9.2006 10.7504   3 
  -7   3   9 1.29095 15.2877   2 
  -5  -3   9 -10.456 20.0082   2 
   5  -3  -9 18.6993 21.4128   1 
  -5   3   9 5.61375 10.7895   2 
  -5   3   9 12.7385 12.9169   3 
   5   3  -9 7.23513 10.1285   3 
   5   3  -9 -4.6281 17.2350   1 
   3  -3  -9 50.9490 20.2628   1 
  -3  -3   9 130.211 29.2570   2 
  -3   3   9 58.5159 16.9400   3 
   3   3  -9 65.7361 16.6928   1 
   3   3  -9 85.9072 14.3788   3 
   1  -3  -9 324.354 29.7881   1 
  -1  -3   9 421.235 42.7690   2 
  -1   3   9 339.572 28.8286   3 
   1   3  -9 426.087 27.9809   3 
   1   3  -9 375.042 24.8432   1 
   1  -3   9 384.009 39.6458   2 
  -1  -3  -9 362.124 32.0416   1 
  -1   3  -9 361.392 28.1046   3 
   1   3   9 390.403 31.0798   3 
  -1   3  -9 351.124 24.0145   1 
   3  -3   9 124.776 30.9975   2 
  -3  -3  -9 131.028 23.8571   1 
  -3  -3  -9 96.0163 14.0418   2 
   3   3   9 108.678 21.2455   3 
  -3   3  -9 120.574 19.8966   3 
  -3   3  -9 132.137 18.4949   1 
  -5  -3  -9 311.354 27.2120   2 
  -5  -3  -9 324.382 32.9238   1 
   5   3   9 315.258 29.5917   3 
  -5   3  -9 339.335 29.5317   3 
  -5   3  -9 301.634 26.4258   1 
  -5   3  -9 338.705 35.7081   2 
  -7  -3  -9 101.640 26.3833   1 
  -7  -3  -9 59.6863 20.0836   2 
   7  -3   9 103.126 22.8766   1 
   7   3   9 76.9552 18.6633   3 
  -7   3  -9 89.6885 28.0131   2 
  -7   3  -9 109.062 21.0798   3 
  -9  -3  -9 31.4203 20.6700   2 
  -9  -3  -9 23.3484 20.3203   1 
   9  -3   9 18.5257 18.0749   1 
  -9   3  -9 11.9643 26.5211   2 
 -11  -3  -9 113.265 32.2939   2 
 -11   3  -9 88.8525 37.0303   2 
  12  -4  -9 -62.876 27.4863   1 
 -12  -4   9 -1.5305 22.9177   2 
 -12   4   9 -10.871 23.9938   2 
  10  -4  -9 194.731 39.5721   1 
 -10  -4   9 204.845 39.4655   2 
  10   4  -9 185.110 32.3553   1 
 -10   4   9 209.990 34.0303   2 
   8  -4  -9 154.155 33.7239   1 
  -8  -4   9 215.229 37.7200   2 
  -8   4   9 206.084 22.6403   3 
   8   4  -9 198.583 29.0124   1 
   8   4  -9 205.690 20.3106   3 
  -8   4   9 224.055 28.2763   2 
  -6  -4   9 34.8541 26.6442   2 
   6  -4  -9 34.0667 26.5743   1 
   6   4  -9 73.3580 22.1345   1 
   6   4  -9 23.6508 11.3888   3 
  -6   4   9 62.4141 16.5913   3 
  -6   4   9 35.6413 15.1030   2 
   4  -4  -9 685.933 49.8038   1 
  -4  -4   9 669.852 53.6011   2 
   4   4  -9 704.566 41.6164   1 
  -4   4   9 672.536 34.9427   2 
  -4   4   9 662.900 42.6027   3 
   4   4  -9 759.924 40.5756   3 
   2  -4  -9 105.038 22.1462   1 
  -2  -4   9 127.679 34.2468   2 
   2   4  -9 96.6762 14.7509   1 
  -2   4   9 108.747 19.3277   3 
   2   4  -9 99.9849 16.3841   3 
   0  -4   9 81.4170 30.8927   2 
   0  -4  -9 66.4496 19.0925   1 
   0   4  -9 79.1310 12.4497   1 
   0   4  -9 71.4214 15.5326   3 
   0   4   9 85.2694 18.7430   3 
   2  -4   9 316.103 40.7605   2 
  -2  -4  -9 328.091 31.6985   1 
  -2   4  -9 321.146 27.4281   3 
  -2   4  -9 283.668 21.1283   1 
   2   4   9 312.062 29.3712   3 
  -4  -4  -9 558.516 33.7076   2 
   4  -4   9 562.033 54.1993   2 
  -4  -4  -9 570.367 43.3024   1 
  -4   4  -9 557.285 37.8123   3 
   4   4   9 591.758 40.5819   3 
   6  -4   9 173.587 26.5929   1 
  -6  -4  -9 189.184 31.2492   1 
  -6  -4  -9 172.308 25.5103   2 
  -6   4  -9 158.848 32.7073   2 
   6   4   9 123.946 22.6661   3 
  -6   4  -9 131.304 22.5442   3 
   8  -4   9 226.977 34.0348   1 
  -8  -4  -9 183.709 31.0811   2 
  -8  -4  -9 195.008 33.2595   1 
   8   4   9 163.884 24.5344   3 
  -8   4  -9 131.169 35.4876   2 
  -8   4  -9 143.160 24.3395   3 
  10  -4   9 -25.006 16.5191   1 
 -10  -4  -9 28.1298 21.8749   2 
  10   4   9 17.6350 20.2647   1 
 -10   4  -9 -11.327 25.3970   2 
 -13  -5   9 -21.903 20.9226   2 
  13  -5  -9 -7.7265 37.8416   1 
 -13   5   9 -18.397 26.8922   2 
  13   5  -9 -52.619 24.9504   1 
  11  -5  -9 -39.934 31.2453   1 
 -11  -5   9 21.5673 24.1880   2 
  11   5  -9 -44.847 20.0205   1 
 -11   5   9 -43.403 19.8863   2 
   9  -5  -9 72.8630 31.2166   1 
  -9  -5   9 85.7907 29.8101   2 
   9   5  -9 77.8866 14.9394   3 
  -9   5   9 85.1374 24.0963   2 
  -9   5   9 61.8706 16.2356   3 
   9   5  -9 85.3879 23.9986   1 
   7  -5  -9 51.8998 30.1125   1 
  -7  -5   9 65.5037 28.3157   2 
   7   5  -9 75.8101 21.6669   1 
   7   5  -9 64.3896 13.9142   3 
  -7   5   9 84.2585 18.3446   3 
  -7   5   9 42.6654 18.7605   2 
  -5  -5   9 1.59153 27.8956   2 
   5  -5  -9 39.6098 26.7019   1 
  -5   5   9 13.8489 13.5301   2 
   5   5  -9 7.09665 10.4005   3 
  -5   5   9 22.6957 14.6979   3 
   5   5  -9 -14.338 17.9123   1 
   3  -5  -9 333.006 35.5488   1 
  -3  -5   9 358.262 48.6465   2 
   3   5  -9 371.080 28.2842   3 
   3   5  -9 351.196 25.6274   1 
  -3   5   9 396.579 32.0932   3 
  -1  -5   9 109.751 37.1351   2 
   1  -5  -9 95.1142 23.3886   1 
   1   5  -9 105.585 11.8976   1 
  -1   5   9 127.067 21.8702   3 
   1   5  -9 120.007 18.5280   3 
   1  -5   9 412.240 51.2898   2 
  -1  -5  -9 286.930 33.3801   1 
  -1   5  -9 364.745 29.0643   3 
   1   5   9 403.611 33.0685   3 
  -1   5  -9 338.022 20.6597   1 
   3  -5   9 57.8253 31.5765   2 
   3  -5   9 63.4483 12.8289   1 
  -3  -5  -9 66.1455 21.8740   1 
  -3  -5  -9 37.6000 13.1176   2 
  -3   5  -9 79.2716 18.4345   3 
   3   5   9 41.2806 17.8813   3 
  -5  -5  -9 124.429 18.6875   2 
   5  -5   9 70.2880 16.3827   1 
  -5  -5  -9 30.6665 18.3056   1 
   5  -5   9 62.7460 31.9728   2 
  -5   5  -9 61.1759 17.5569   3 
   5   5   9 61.7542 18.4827   3 
   7  -5   9 195.662 28.7906   1 
  -7  -5  -9 155.592 31.5763   1 
  -7  -5  -9 194.211 35.4983   2 
   7   5   9 156.341 25.3389   3 
  -7   5  -9 198.552 26.2795   3 
  -7   5  -9 150.043 36.9632   2 
  -9  -5  -9 13.8855 20.8129   1 
   9  -5   9 26.0966 18.1035   1 
  -9   5  -9 37.2379 27.9106   2 
 -12  -6   9 -11.134 23.9721   2 
  12  -6  -9 -10.997 37.0910   1 
 -12   6   9 -0.4858 26.7851   2 
  12   6  -9 -62.842 20.0367   1 
  10  -6  -9 25.7895 35.0817   1 
 -10  -6   9 79.9234 31.5157   2 
 -10   6   9 51.7110 26.1846   2 
  10   6  -9 -2.8165 23.1542   1 
  -8  -6   9 17.1448 27.0978   2 
   8  -6  -9 52.5227 32.4146   1 
   8   6  -9 53.7567 14.0238   3 
  -8   6   9 42.3713 22.8036   2 
  -8   6   9 87.3468 19.8134   3 
   8   6  -9 37.5381 21.5132   1 
  -6  -6   9 0.50386 26.5820   2 
   6  -6  -9 0.83821 25.6132   1 
   6   6  -9 2.15231 17.2998   1 
   6   6  -9 25.1391 12.1709   3 
  -6   6   9 22.0114 16.3065   3 
  -6   6   9 3.99769 16.7674   2 
   4  -6  -9 565.213 49.0403   1 
  -4  -6   9 482.052 57.1209   2 
  -4   6   9 677.291 43.6235   3 
   4   6  -9 693.877 40.4315   3 
   4   6  -9 625.961 37.9205   1 
  -2  -6   9 46.9586 38.0064   2 
   2  -6  -9 63.8443 22.1779   1 
  -2   6   9 62.6082 18.9236   3 
   2   6  -9 60.8568 15.9544   3 
   0  -6  -9 232.860 33.2444   1 
   0  -6   9 237.177 47.2410   2 
   0   6  -9 293.163 27.5841   3 
   0   6   9 260.863 29.9310   3 
  -2  -6  -9 1218.51 72.8403   1 
   2  -6   9 1247.69 85.7112   2 
  -2   6  -9 1396.77 69.2138   3 
   2   6   9 1391.93 72.1473   3 
   4  -6   9 12.5708 29.5571   2 
  -4  -6  -9 12.2316 16.9421   1 
   4   6   9 -3.9368 15.5502   3 
  -4   6  -9 14.3472 15.6920   3 
   6  -6   9 129.121 39.6472   2 
  -6  -6  -9 172.873 31.2136   1 
   6   6   9 130.978 24.6285   3 
  -6   6  -9 137.899 24.4010   3 
  -8  -6  -9 48.3214 24.7336   1 
  -8   6  -9 3.70393 16.4145   3 
  -8   6  -9 -3.9806 27.8736   2 
   8   6   9 36.6683 23.2035   3 
 -10   6  -9 -20.504 29.7252   2 
  11  -7  -9 -30.785 32.7413   1 
 -11  -7   9 32.5396 29.3919   2 
 -11   7   9 50.3183 29.9741   2 
  11   7  -9 -1.9099 23.9173   1 
   9  -7  -9 63.5064 35.0757   1 
  -9  -7   9 126.500 34.3930   2 
   9   7  -9 86.1147 26.5152   1 
  -9   7   9 115.180 22.7833   3 
  -9   7   9 98.2093 28.0461   2 
   9   7  -9 103.581 17.1615   3 
   7  -7  -9 71.3528 31.9901   1 
  -7  -7   9 92.0359 33.3193   2 
   7   7  -9 55.4322 14.2910   3 
   7   7  -9 50.6565 21.5358   1 
  -7   7   9 28.9279 22.8214   2 
  -7   7   9 82.5624 20.6994   3 
   5  -7  -9 69.5755 27.8062   1 
  -5  -7   9 59.5082 34.5861   2 
  -5   7   9 91.4945 21.8226   3 
   5   7  -9 79.2876 17.2404   3 
  -3  -7   9 127.190 44.7602   2 
   3  -7  -9 194.607 31.7246   1 
   3   7  -9 237.754 25.6127   3 
  -3   7   9 220.657 29.3428   3 
   1  -7  -9 -2.5429 18.5792   1 
  -1  -7   9 -8.5320 37.5744   2 
   1   7  -9 -7.7672 13.4320   3 
  -1   7   9 14.8818 17.1974   3 
  -1  -7  -9 308.544 33.8670   1 
   1  -7   9 217.501 48.3750   2 
  -1   7  -9 250.961 28.1534   3 
   1   7   9 266.827 32.6402   3 
  -3  -7  -9 78.2533 23.5118   1 
   3  -7   9 97.5596 38.2923   2 
   3   7   9 86.3021 22.9481   3 
  -3   7  -9 111.002 22.8036   3 
  -5  -7  -9 68.1576 24.7052   1 
   5  -7   9 65.7302 36.0288   2 
  -5   7  -9 82.5615 21.2922   3 
   5   7   9 54.5104 20.7391   3 
  -7  -7  -9 24.2395 20.3925   1 
   7  -7   9 27.5778 31.3706   2 
   7   7   9 1.28997 15.8155   3 
  -7   7  -9 21.9738 18.8944   3 
   9  -7   9 131.464 40.4442   2 
  -9  -7  -9 -28.904 19.7940   1 
  10  -8  -9 29.7092 35.2694   1 
 -10  -8   9 12.4762 28.6042   2 
  -8  -8   9 32.8665 28.3663   2 
   8  -8  -9 27.9764 31.7017   1 
  -8   8   9 -3.0779 16.6229   3 
   8   8  -9 20.9411 13.4295   3 
  -6  -8   9 17.4332 30.7635   2 
   6  -8  -9 8.69558 25.5005   1 
  -6   8   9 43.3236 18.5356   3 
   6   8  -9 39.4556 14.4345   3 
  -4  -8   9 125.140 41.7261   2 
   4  -8  -9 120.408 29.6399   1 
   4   8  -9 183.860 23.7439   3 
  -4   8   9 108.282 24.8939   3 
   2  -8  -9 21.8718 20.8720   1 
  -2  -8   9 25.0189 40.1884   2 
  -2   8   9 1.76443 17.2122   3 
   2   8  -9 14.3764 14.5595   3 
   0  -8   9 -3.2180 37.5941   2 
   0  -8  -9 41.7943 21.2712   1 
   0   8   9 34.7591 20.3107   3 
   0   8  -9 30.2418 16.4229   3 
  -2  -8  -9 117.289 27.6453   1 
   2  -8   9 93.5152 43.5037   2 
   2   8   9 134.984 25.6510   3 
  -2   8  -9 114.664 22.3003   3 
   4  -8   9 30.0132 35.3834   2 
  -4  -8  -9 26.5987 18.7302   1 
   4   8   9 18.9873 18.1811   3 
  -4   8  -9 -14.382 14.7449   3 
   6  -8   9 154.872 46.5218   2 
  -6  -8  -9 137.185 31.6668   1 
  -6   8  -9 166.271 28.4091   3 
   6   8   9 160.483 27.8212   3 
   8  -8   9 170.393 45.7032   2 
  -8  -8  -9 106.185 31.0229   1 
  -8   8  -9 105.962 24.8972   3 
   9  -9  -9 20.8042 33.5318   1 
  -9  -9   9 11.7067 30.3564   2 
  -9   9   9 9.57634 19.7758   3 
   7  -9  -9 -4.0869 26.9221   1 
  -7  -9   9 7.38193 28.4395   2 
   7   9  -9 -5.7856 12.3295   3 
  -7   9   9 21.2874 18.9855   3 
  -5  -9   9 40.0934 35.6222   2 
   5  -9  -9 -23.981 20.1096   1 
   5   9  -9 16.1128 14.6793   3 
  -5   9   9 -36.286 17.3366   3 
   3  -9  -9 14.7070 21.3149   1 
  -3  -9   9 10.2590 38.7684   2 
   3   9  -9 20.6765 15.2288   3 
  -1  -9   9 72.8228 44.0311   2 
   1  -9  -9 -7.0917 19.1006   1 
   1   9  -9 3.33261 14.9195   3 
  -1   9   9 -19.252 17.3536   3 
   1  -9   9 10.8396 40.5921   2 
  -1  -9  -9 27.2029 20.6005   1 
   1   9   9 40.0182 23.0589   3 
  -1   9  -9 62.4355 20.4747   3 
   3  -9   9 -15.719 37.4752   2 
  -3  -9  -9 -7.3389 18.0045   1 
  -3   9  -9 15.7625 19.1324   3 
   3   9   9 28.1387 20.8793   3 
  -5  -9  -9 7.49819 19.9695   1 
   5  -9   9 -26.536 33.9642   2 
   5   9   9 6.29719 19.9567   3 
  -5   9  -9 22.7762 20.6370   3 
  -7  -9  -9 38.7071 25.6237   1 
   7  -9   9 60.6258 44.6773   2 
   7   9   9 48.6447 22.0591   3 
  -7   9  -9 80.9152 23.8163   3 
   8 -10  -9 6.65373 28.9450   1 
  -8 -10   9 85.0825 36.2264   2 
  -8  10   9 11.8038 20.3468   3 
   8  10  -9 12.5970 16.2095   3 
   6 -10  -9 -5.2351 24.0006   1 
  -6 -10   9 29.8290 32.6343   2 
   6  10  -9 23.0298 15.4491   3 
  -6  10   9 9.61042 17.7767   3 
   4 -10  -9 75.1948 26.4270   1 
  -4 -10   9 50.0085 41.3225   2 
  -4  10   9 20.1551 21.5606   3 
   4  10  -9 94.2424 22.3883   3 
  -2 -10   9 -46.019 41.1746   2 
   2 -10  -9 10.3550 21.3837   1 
   2  10  -9 -22.470 14.0515   3 
  -2  10   9 16.4903 20.7966   3 
   0 -10   9 19.5914 43.2999   2 
   0 -10  -9 65.0778 24.4620   1 
   0  10  -9 20.3893 17.0924   3 
   0  10   9 -26.389 20.1618   3 
  -2 -10  -9 96.1332 26.7718   1 
   2 -10   9 53.2195 47.3128   2 
   2  10   9 54.5834 25.1080   3 
  -2  10  -9 54.8953 22.3922   3 
  -4 -10  -9 32.7105 25.2963   1 
   4 -10   9 53.7589 43.7868   2 
   4  10   9 32.6377 23.0598   3 
  -4  10  -9 46.7666 20.7900   3 
  -6 -10  -9 1.39540 19.4642   1 
   6 -10   9 -1.6307 41.0908   2 
  -6  10  -9 22.5169 21.3184   3 
   6  10   9 -2.6886 19.5986   3 
  -7 -11   9 7.22131 33.5712   2 
   7 -11  -9 58.4107 31.9939   1 
  -7  11   9 -27.079 17.4169   3 
   7  11  -9 10.4249 15.5779   3 
  -5 -11   9 34.6459 37.3903   2 
   5 -11  -9 26.9880 25.9239   1 
  -5  11   9 -35.555 19.3330   3 
   5  11  -9 -9.1592 15.5084   3 
   3 -11  -9 37.1991 23.3651   1 
  -3 -11   9 -14.850 41.4547   2 
   3  11  -9 27.6352 18.6707   3 
  -3  11   9 -12.588 21.3489   3 
   1 -11  -9 -3.3577 21.4078   1 
  -1 -11   9 7.20980 43.2250   2 
   1  11  -9 5.42692 18.0720   3 
  -1  11   9 -4.7619 21.6398   3 
  -1 -11  -9 50.4260 24.7193   1 
   1 -11   9 -34.367 44.0815   2 
   1  11   9 18.0627 23.7063   3 
  -1  11  -9 44.4801 21.7137   3 
  -3 -11  -9 12.7645 19.8465   1 
   3 -11   9 -4.1420 46.2436   2 
  -3  11  -9 9.40556 20.8503   3 
   3  11   9 27.9064 24.0159   3 
   5 -11   9 26.9560 50.6979   2 
  -5 -11  -9 20.9711 23.2751   1 
   5  11   9 5.03771 20.8115   3 
  -5  11  -9 -32.239 21.0365   3 
  -6 -12   9 3.13775 35.5597   2 
   6 -12  -9 48.9150 30.0105   1 
  -6  12   9 -16.942 19.7634   3 
   6  12  -9 -10.993 16.4834   3 
   4 -12  -9 78.2658 29.9136   1 
  -4 -12   9 98.8946 47.5000   2 
   4  12  -9 69.0028 22.8106   3 
  -4  12   9 53.6190 27.0244   3 
  -2 -12   9 -14.784 45.7398   2 
   2 -12  -9 16.8394 23.0618   1 
  -2  12   9 32.6576 23.4320   3 
   2  12  -9 2.20627 18.9073   3 
   0 -12   9 10.2196 53.4953   2 
   0 -12  -9 15.3874 20.9852   1 
   0  12   9 10.4901 22.6538   3 
   0  12  -9 9.41158 19.4051   3 
  -2 -12  -9 56.7803 25.7643   1 
   2 -12   9 39.6405 55.1597   2 
   2  12   9 46.1888 24.4821   3 
  -2  12  -9 9.21726 22.6417   3 
  -3  13   9 -45.460 19.9352   3 
  -1 -13   9 -8.7173 54.0209   2 
   1  13  -9 -27.278 19.1102   3 
  -1  13   9 11.6960 25.9425   3 
 -14   0  10 81.2487 33.8836   2 
 -12   0  10 0.04107 20.9515   2 
  12   0 -10 24.9906 28.9047   1 
 -10   0  10 391.148 41.0106   2 
  10   0 -10 319.634 43.4888   1 
  -8   0  10 43.1723 21.7825   2 
   8   0 -10 19.5357 24.5898   1 
  -8   0  10 8.45405 13.8856   3 
  -6   0  10 132.162 25.5275   2 
  -6   0  10 117.040 20.7432   3 
   6   0 -10 163.351 29.5497   1 
  -4   0  10 297.803 27.7928   3 
  -4   0  10 282.480 25.9059   2 
   4   0 -10 320.110 32.9418   1 
   2   0 -10 197.575 23.9150   1 
  -2   0  10 201.679 24.2307   2 
   2   0 -10 213.337 20.9755   3 
   0   0  10 259.257 28.7197   2 
   0   0 -10 305.684 27.8130   1 
   0   0 -10 255.986 23.7295   3 
  -2   0 -10 153.302 21.2191   3 
   2   0  10 158.899 24.7141   2 
  -2   0 -10 162.961 23.4440   1 
  -4   0 -10 11.0531 13.5352   2 
  -4   0 -10 2.64976 14.3355   1 
  -6   0 -10 1199.52 67.1418   2 
   6   0  10 1145.56 66.1204   3 
  -6   0 -10 1192.62 67.4760   1 
   8   0  10 350.677 34.3717   3 
  -8   0 -10 378.368 39.5579   2 
 -10   0 -10 -14.982 21.9123   2 
  10   0  10 -23.665 19.1128   1 
  13  -1 -10 -32.213 29.6555   1 
 -13  -1  10 70.2498 28.5342   2 
 -13   1  10 49.3295 31.5167   2 
  13   1 -10 -17.114 27.8157   1 
 -11  -1  10 -10.389 18.3827   2 
  11  -1 -10 -39.605 25.4467   1 
 -11   1  10 1.65325 20.9211   2 
  11   1 -10 -36.261 24.9364   1 
   9  -1 -10 213.968 38.2605   1 
  -9  -1  10 373.488 39.2171   2 
  -9  -1  10 308.052 26.3776   3 
  -9   1  10 352.015 35.0966   2 
   9   1 -10 264.213 38.2761   1 
  -9   1  10 287.366 24.5838   3 
  -7  -1  10 52.9243 23.2358   2 
  -7  -1  10 79.6502 19.3174   3 
   7  -1 -10 53.1301 26.4303   1 
  -7   1  10 35.3003 13.2396   3 
  -7   1  10 66.1447 20.8321   2 
   7   1 -10 133.283 29.0376   1 
   5  -1 -10 271.902 34.9417   1 
  -5  -1  10 256.045 29.1560   2 
   5   1 -10 251.719 22.3775   3 
  -5   1  10 225.248 25.2244   3 
   5   1 -10 271.288 33.2621   1 
  -5   1  10 283.456 25.8616   2 
  -3  -1  10 221.150 28.2095   2 
   3  -1 -10 255.139 30.1463   1 
   3   1 -10 288.312 28.0964   1 
   3   1 -10 216.901 21.4326   3 
  -3   1  10 210.518 19.8942   2 
  -3   1  10 236.151 25.6309   3 
  -1  -1  10 473.892 37.8239   2 
   1  -1 -10 496.670 35.2003   1 
  -1   1  10 467.236 29.2513   2 
   1   1 -10 511.869 32.7791   3 
  -1   1  10 424.094 34.0485   3 
   1   1 -10 496.532 32.5296   1 
   1  -1  10 22.8937 19.4427   2 
  -1  -1 -10 13.3883 15.3195   1 
   1   1  10 13.4720 14.6985   2 
  -1   1 -10 15.4452 11.5358   3 
   1   1  10 15.0808 14.7614   3 
  -1   1 -10 7.34256 11.7105   1 
  -3  -1 -10 371.173 26.4635   2 
   3  -1  10 366.760 37.8231   2 
  -3  -1 -10 332.613 31.0379   1 
  -3   1 -10 337.350 29.6110   1 
   3   1  10 418.962 33.6953   3 
  -3   1 -10 341.163 28.6604   3 
  -5  -1 -10 44.0717 15.8061   2 
  -5  -1 -10 76.9654 20.8569   1 
  -5   1 -10 102.646 21.3157   1 
   5   1  10 61.8176 19.3841   3 
  -5   1 -10 60.7041 20.0361   2 
  -5   1 -10 75.0976 18.1036   3 
   7  -1  10 147.763 25.2857   3 
  -7  -1 -10 149.962 28.4832   2 
  -7  -1 -10 199.884 32.0093   1 
   7   1  10 118.294 22.9625   3 
  -7   1 -10 108.581 23.4661   1 
  -7   1 -10 140.125 31.0191   2 
  -9  -1 -10 18.4319 21.2161   2 
   9  -1  10 0.01033 17.5853   1 
  -9   1 -10 -11.646 19.6306   2 
   9   1  10 25.0762 19.9289   1 
  12  -2 -10 46.4589 32.4004   1 
 -12  -2  10 38.0679 27.5088   2 
 -12   2  10 24.2533 22.6815   2 
  12   2 -10 -4.3229 26.1536   1 
 -10  -2  10 324.000 44.6775   2 
  10  -2 -10 157.146 37.6203   1 
 -10   2  10 293.417 34.3534   2 
  10   2 -10 225.054 37.2444   1 
  -8  -2  10 -11.648 17.8192   2 
   8  -2 -10 3.51778 24.3719   1 
   8   2 -10 -23.811 20.7640   1 
  -8   2  10 38.1376 12.4783   3 
  -8   2  10 30.0810 19.1016   2 
  -6  -2  10 119.840 28.3119   2 
   6  -2 -10 95.9967 28.8833   1 
   6   2 -10 131.594 18.1555   3 
  -6   2  10 140.679 21.0064   3 
   6   2 -10 118.740 27.0826   1 
  -6   2  10 89.1989 19.3974   2 
  -4  -2  10 600.103 45.7826   2 
   4  -2 -10 660.697 47.6309   1 
  -4   2  10 650.360 35.6132   2 
  -4   2  10 686.692 41.4609   3 
   4   2 -10 665.838 39.1329   3 
   4   2 -10 695.665 44.1852   1 
   2  -2 -10 24.7906 16.0146   1 
  -2  -2  10 -10.210 21.8406   2 
  -2   2  10 -9.1710 10.2512   3 
   2   2 -10 8.89927 9.64037   3 
   2   2 -10 1.23345 12.3393   1 
   0  -2  10 565.185 46.4889   2 
   0  -2 -10 567.600 40.0420   1 
   0   2  10 557.777 39.9017   3 
   0   2 -10 598.861 35.4091   1 
   0   2 -10 590.698 36.9758   3 
  -2  -2 -10 331.141 31.2362   1 
   2  -2  10 303.423 36.7868   2 
  -2   2 -10 319.014 26.7708   1 
   2   2  10 310.464 30.8452   3 
  -2   2 -10 333.647 27.7556   3 
  -4  -2 -10 63.3960 14.1825   2 
  -4  -2 -10 64.9548 21.8931   1 
  -4   2 -10 44.0877 16.4838   1 
   4   2  10 61.0244 18.5986   3 
  -4   2 -10 63.1854 17.4300   3 
  -6  -2 -10 108.119 24.6277   1 
  -6  -2 -10 144.473 23.7421   2 
  -6   2 -10 97.5903 26.6209   2 
  -6   2 -10 110.601 21.7720   3 
  -6   2 -10 132.985 23.1977   1 
   6   2  10 110.973 22.8696   3 
   8  -2  10 -29.828 12.6047   1 
  -8  -2 -10 -8.0127 15.6013   1 
  -8  -2 -10 -5.5474 16.4855   2 
   8   2  10 -4.7914 13.0628   3 
  -8   2 -10 5.65794 21.3127   2 
  -8   2 -10 -13.265 11.2901   3 
  10  -2  10 82.7398 28.8892   1 
 -10  -2 -10 46.0958 25.4014   2 
  10   2  10 41.1590 23.2066   1 
 -10   2 -10 -10.916 24.7954   2 
  13  -3 -10 -64.543 30.7678   1 
 -13  -3  10 27.5083 26.8042   2 
  13   3 -10 5.66888 30.6601   1 
 -13   3  10 -2.0038 25.2470   2 
 -11  -3  10 19.2106 23.8824   2 
  11  -3 -10 49.0603 32.8511   1 
  11   3 -10 -31.233 23.4084   1 
 -11   3  10 16.9189 23.3408   2 
  -9  -3  10 159.812 34.4230   2 
   9  -3 -10 100.179 32.1727   1 
   9   3 -10 86.6357 27.8665   1 
  -9   3  10 167.616 20.9910   3 
  -9   3  10 158.037 29.1539   2 
   9   3 -10 121.968 16.9693   3 
   7  -3 -10 35.5330 27.5675   1 
  -7  -3  10 44.7580 25.9521   2 
   7   3 -10 35.0030 23.4402   1 
  -7   3  10 0.31755 13.8267   3 
   7   3 -10 5.43572 11.6424   3 
  -7   3  10 4.64027 14.5867   2 
   5  -3 -10 41.2765 24.5220   1 
  -5  -3  10 17.5521 22.7588   2 
  -5   3  10 35.1015 12.6647   2 
   5   3 -10 26.0163 20.5944   1 
   5   3 -10 20.1528 12.1284   3 
  -5   3  10 48.7150 16.6892   3 
   3  -3 -10 28.7461 19.3028   1 
  -3  -3  10 49.3441 27.1919   2 
   3   3 -10 48.6687 16.6801   1 
  -3   3  10 54.4104 16.9428   3 
   3   3 -10 71.9178 15.1469   3 
   1  -3 -10 -22.686 13.1083   1 
  -1  -3  10 7.95438 26.5023   2 
  -1   3  10 16.8476 14.3206   3 
   1   3 -10 11.9645 10.7689   3 
   1   3 -10 -2.6226 10.4017   1 
   1  -3  10 24.9241 25.9207   2 
  -1  -3 -10 -2.6489 15.2611   1 
  -1   3 -10 39.4923 14.3777   3 
  -1   3 -10 29.9603 11.5790   1 
   1   3  10 28.0642 15.8157   3 
  -3  -3 -10 811.735 41.0770   2 
  -3  -3 -10 868.331 53.7925   1 
   3  -3  10 832.240 61.4448   2 
  -3   3 -10 865.779 49.6404   3 
   3   3  10 857.351 51.7618   3 
  -3   3 -10 778.059 45.2174   1 
  -5  -3 -10 166.080 22.3137   2 
  -5  -3 -10 137.406 27.6140   1 
  -5   3 -10 170.827 23.8200   1 
  -5   3 -10 167.779 24.1345   3 
  -5   3 -10 123.400 28.2115   2 
   5   3  10 142.860 24.5677   3 
  -7  -3 -10 304.691 40.7775   1 
   7  -3  10 265.346 32.0363   1 
  -7  -3 -10 243.013 29.7683   2 
  -7   3 -10 247.211 27.6772   3 
   7   3  10 230.487 29.1959   3 
  -7   3 -10 293.525 42.2539   2 
  -9  -3 -10 0.09615 20.2770   1 
   9  -3  10 15.9040 20.6287   1 
  -9  -3 -10 6.71016 16.5087   2 
  -9   3 -10 -41.533 21.7682   2 
 -12  -4  10 31.8204 24.4780   2 
  12  -4 -10 -51.078 29.3177   1 
  12   4 -10 -54.225 22.0110   1 
 -12   4  10 20.5647 24.4509   2 
  10  -4 -10 184.850 41.1950   1 
 -10  -4  10 283.472 44.7507   2 
 -10   4  10 315.729 36.0970   2 
  10   4 -10 278.901 39.3134   1 
  -8  -4  10 27.0476 25.8436   2 
   8  -4 -10 6.75480 27.2398   1 
  -8   4  10 -0.3378 15.6491   2 
   8   4 -10 -7.6868 9.88825   3 
  -8   4  10 -7.2523 13.1314   3 
   8   4 -10 7.21043 21.9386   1 
   6  -4 -10 73.6540 28.5876   1 
  -6  -4  10 56.6464 29.2083   2 
   6   4 -10 90.8448 16.8206   3 
   6   4 -10 33.6740 23.0500   1 
  -6   4  10 130.244 21.3863   3 
  -6   4  10 101.465 19.0024   2 
  -4  -4  10 214.939 39.0996   2 
   4  -4 -10 196.104 32.1952   1 
   4   4 -10 263.748 23.2831   3 
   4   4 -10 244.651 27.3208   1 
  -4   4  10 220.306 28.2616   3 
  -4   4  10 183.511 16.3351   2 
  -2  -4  10 39.5180 33.0229   2 
   2  -4 -10 28.2086 17.7635   1 
   2   4 -10 32.1517 13.1133   3 
   2   4 -10 40.7542 12.9388   1 
  -2   4  10 23.3426 16.1297   3 
   0  -4 -10 365.335 34.4939   1 
   0  -4  10 370.405 48.7135   2 
   0   4  10 406.226 33.6501   3 
   0   4 -10 389.339 25.2579   1 
   0   4 -10 367.503 29.6868   3 
  -2  -4 -10 223.534 31.1671   1 
   2  -4  10 226.413 40.1434   2 
  -2   4 -10 213.977 20.3417   1 
   2   4  10 254.119 28.3419   3 
  -2   4 -10 213.477 24.4609   3 
   4  -4  10 6.45898 26.3793   2 
  -4  -4 -10 20.6247 17.1286   1 
  -4   4 -10 5.92582 13.5304   3 
   4   4  10 -7.1641 13.9657   3 
  -4   4 -10 -15.603 8.88737   1 
   6  -4  10 431.029 35.8758   1 
  -6  -4 -10 430.037 39.4815   1 
   6   4  10 377.903 34.3985   3 
  -6   4 -10 354.205 41.9512   2 
  -6   4 -10 371.137 32.7899   3 
   8  -4  10 91.1467 24.8018   1 
  -8  -4 -10 117.396 28.9573   1 
   8   4  10 61.2974 19.5538   3 
  -8   4 -10 49.5870 18.1034   3 
  -8   4 -10 4.10253 24.9212   2 
  10  -4  10 1.85946 20.5751   1 
 -10   4 -10 12.1983 30.7370   2 
  10   4  10 184.000 35.0278   1 
 -13  -5  10 9.81273 27.3533   2 
 -13   5  10 70.0820 32.5436   2 
 -11  -5  10 38.6053 27.2238   2 
  11  -5 -10 -59.805 30.6758   1 
 -11   5  10 12.7942 26.0097   2 
  11   5 -10 -34.200 23.8381   1 
   9  -5 -10 65.8466 33.3007   1 
  -9  -5  10 113.118 32.4513   2 
  -9   5  10 136.291 22.4665   3 
   9   5 -10 60.0835 26.7330   1 
  -9   5  10 135.860 29.0483   2 
   9   5 -10 149.511 19.4456   3 
   7  -5 -10 6.40025 26.2424   1 
  -7  -5  10 24.3156 26.0422   2 
   7   5 -10 3.64812 10.9371   3 
  -7   5  10 -0.2662 16.3496   2 
   7   5 -10 12.5640 20.4524   1 
  -7   5  10 10.1227 14.2627   3 
   5  -5 -10 41.3873 26.7784   1 
  -5  -5  10 11.4707 29.6282   2 
   5   5 -10 26.8923 20.8815   1 
   5   5 -10 21.1103 12.6975   3 
  -5   5  10 53.7818 18.0132   3 
  -5   5  10 49.0208 15.2572   2 
  -3  -5  10 38.2573 34.2950   2 
   3  -5 -10 8.90249 20.0982   1 
  -3   5  10 9.34630 14.7270   3 
   3   5 -10 12.4489 13.2401   1 
   3   5 -10 28.0978 13.3796   3 
  -1  -5  10 270.390 47.3756   2 
   1  -5 -10 285.925 33.5592   1 
   1   5 -10 267.844 19.1668   1 
   1   5 -10 257.704 25.4148   3 
  -1   5  10 312.916 31.1222   3 
   1  -5  10 204.054 44.0108   2 
  -1  -5 -10 153.996 27.0910   1 
  -1   5 -10 218.819 25.5888   3 
   1   5  10 172.922 25.8858   3 
  -1   5 -10 174.815 16.6295   1 
  -3  -5 -10 148.862 27.9448   1 
   3  -5  10 145.023 38.1480   2 
   3   5  10 162.454 25.1783   3 
  -3   5 -10 182.451 24.6706   3 
   5  -5  10 21.0940 29.6388   2 
  -5  -5 -10 34.3578 20.0187   1 
   5  -5  10 25.1467 14.4849   1 
   5   5  10 25.4938 17.2963   3 
  -5   5 -10 18.5355 15.7436   3 
  -7  -5 -10 237.449 39.2039   1 
   7  -5  10 181.698 32.2413   1 
   7   5  10 135.050 25.5510   3 
  -7   5 -10 200.609 28.2061   3 
  -9  -5 -10 74.1469 27.1581   1 
  -9   5 -10 18.1968 29.5328   2 
 -12  -6  10 -19.888 23.5094   2 
  12  -6 -10 -80.190 32.8624   1 
 -12   6  10 -13.720 26.1631   2 
  12   6 -10 -48.951 24.9318   1 
  10  -6 -10 45.3521 35.7994   1 
 -10  -6  10 166.525 39.6520   2 
  10   6 -10 32.0376 26.3965   1 
 -10   6  10 118.551 30.5541   2 
  -8  -6  10 9.56301 24.7250   2 
   8  -6 -10 -5.2024 29.0846   1 
   8   6 -10 -10.437 9.37372   3 
  -8   6  10 -4.3668 13.7623   3 
  -8   6  10 -24.994 18.0327   2 
  -6  -6  10 87.7406 31.6206   2 
   6  -6 -10 99.1530 31.1295   1 
   6   6 -10 98.9233 25.1793   1 
   6   6 -10 100.876 18.4846   3 
  -6   6  10 96.3407 21.6234   3 
   4  -6 -10 324.184 39.1135   1 
  -4  -6  10 232.098 46.3785   2 
   4   6 -10 313.353 27.4658   1 
  -4   6  10 362.416 33.3751   3 
   4   6 -10 344.738 29.2359   3 
   2  -6 -10 -8.0652 18.3816   1 
  -2  -6  10 3.11465 37.7972   2 
  -2   6  10 13.3090 17.4260   3 
   2   6 -10 11.3147 13.6377   3 
   0  -6 -10 80.4804 24.6300   1 
   0  -6  10 123.960 43.2894   2 
   0   6  10 112.008 23.4580   3 
   0   6 -10 106.021 19.8115   3 
   2  -6  10 49.4811 35.1890   2 
  -2  -6 -10 27.6058 20.0855   1 
  -2   6 -10 48.0070 18.0889   3 
   2   6  10 45.7829 19.7325   3 
  -4  -6 -10 14.1362 17.4398   1 
   4  -6  10 11.6234 29.9986   2 
  -4   6 -10 48.6500 19.2437   3 
   4   6  10 36.5546 19.0520   3 
   6  -6  10 144.944 40.1690   2 
  -6  -6 -10 109.708 28.5886   1 
  -6   6 -10 165.161 25.9668   3 
   6   6  10 119.290 25.1650   3 
   8  -6  10 52.8539 32.5975   2 
  -8  -6 -10 51.2441 23.7850   1 
  -8   6 -10 69.1920 23.2315   3 
  11  -7 -10 -42.661 34.3141   1 
 -11  -7  10 30.2058 30.7833   2 
  11   7 -10 -61.993 24.3841   1 
   9  -7 -10 87.2517 37.4507   1 
  -9  -7  10 103.284 34.9016   2 
   9   7 -10 89.1080 16.7399   3 
   9   7 -10 9.95357 25.4291   1 
  -9   7  10 165.738 26.8291   3 
  -7  -7  10 10.4944 27.2585   2 
   7  -7 -10 -13.408 27.5092   1 
   7   7 -10 22.9952 13.4892   3 
  -7   7  10 32.8357 17.6300   3 
  -5  -7  10 108.046 36.6112   2 
   5  -7 -10 108.199 30.0509   1 
  -5   7  10 170.849 28.5463   3 
   5   7 -10 148.773 22.0779   3 
   3  -7 -10 156.015 30.1078   1 
  -3  -7  10 152.251 44.0295   2 
   3   7 -10 174.402 23.6821   3 
  -3   7  10 219.448 29.9199   3 
   1  -7 -10 4.67246 19.1868   1 
  -1  -7  10 2.86248 36.2346   2 
  -1   7  10 12.9076 17.5940   3 
   1   7 -10 23.7160 15.6253   3 
  -1  -7 -10 54.9584 22.8973   1 
   1  -7  10 -8.7800 36.4020   2 
  -1   7 -10 55.1173 17.3303   3 
   1   7  10 2.28968 19.1260   3 
   3  -7  10 98.6920 40.5743   2 
  -3  -7 -10 60.9878 23.4848   1 
   3   7  10 81.8303 23.0316   3 
  -3   7 -10 87.2090 20.5640   3 
   5  -7  10 -37.569 28.0184   2 
  -5  -7 -10 11.5551 20.7694   1 
   5   7  10 -12.517 15.3288   3 
  -5   7 -10 1.16521 14.8074   3 
   7  -7  10 26.4611 35.1631   2 
  -7  -7 -10 -4.5770 18.7974   1 
  -7   7 -10 19.7208 18.6659   3 
   7   7  10 10.8921 19.1997   3 
 -10  -8  10 72.5674 34.1009   2 
  10  -8 -10 15.7540 34.0700   1 
  -8  -8  10 -18.526 27.2981   2 
   8  -8 -10 46.5915 31.4678   1 
   8   8 -10 14.7936 14.2386   3 
  -8   8  10 -28.899 14.9846   3 
   6  -8 -10 20.4111 26.9610   1 
  -6  -8  10 17.2254 30.3166   2 
  -6   8  10 -24.884 14.8958   3 
   6   8 -10 17.1799 14.1829   3 
  -4  -8  10 5.16595 35.3417   2 
   4  -8 -10 7.60781 22.2159   1 
   4   8 -10 7.88870 14.4069   3 
  -4   8  10 26.2445 19.4295   3 
  -2  -8  10 11.5564 38.7241   2 
   2  -8 -10 8.70782 19.8269   1 
  -2   8  10 29.9992 21.0082   3 
   2   8 -10 13.9861 14.5814   3 
   0  -8  10 25.1140 41.1767   2 
   0  -8 -10 70.4987 23.3638   1 
   0   8  10 81.3031 25.3452   3 
   0   8 -10 85.3384 21.9872   3 
  -2  -8 -10 116.230 28.2499   1 
   2  -8  10 76.3194 43.6834   2 
   2   8  10 135.544 26.5777   3 
  -2   8 -10 78.0396 22.0784   3 
   4  -8  10 3.53919 37.1499   2 
  -4  -8 -10 -14.327 16.2400   1 
   4   8  10 -15.662 16.7906   3 
  -4   8 -10 -4.9677 16.9441   3 
  -6  -8 -10 120.539 32.9968   1 
   6  -8  10 68.9607 41.1490   2 
  -6   8 -10 93.5643 24.3475   3 
   6   8  10 81.3369 24.7703   3 
   8  -8  10 40.6301 40.6231   2 
  -8   8 -10 46.7345 23.3565   3 
   9  -9 -10 -1.3581 31.7686   1 
  -9  -9  10 -7.9131 29.0466   2 
  -9   9  10 29.3161 20.7974   3 
   7  -9 -10 49.9317 29.1516   1 
  -7  -9  10 51.5990 33.5260   2 
   7   9 -10 -2.7222 13.4400   3 
  -7   9  10 -11.659 17.8481   3 
  -5  -9  10 -9.7271 32.2879   2 
   5  -9 -10 39.4163 25.2410   1 
   5   9 -10 -5.0212 13.8898   3 
  -5   9  10 -10.176 19.7364   3 
  -3  -9  10 -17.020 39.0078   2 
   3  -9 -10 -19.447 18.7344   1 
   3   9 -10 -6.2207 15.4802   3 
  -3   9  10 -14.470 19.9154   3 
  -1  -9  10 10.4852 42.6268   2 
   1  -9 -10 40.0934 25.6711   1 
   1   9 -10 31.8086 18.0366   3 
  -1   9  10 19.6667 21.2992   3 
   1  -9  10 19.2192 43.8813   2 
  -1  -9 -10 84.2759 23.8079   1 
   1   9  10 77.8455 26.0777   3 
  -1   9 -10 52.4057 21.7929   3 
  -3  -9 -10 18.5123 21.0839   1 
   3  -9  10 30.8298 44.0785   2 
  -3   9 -10 67.2452 23.3263   3 
   3   9  10 36.8107 21.1752   3 
  -5  -9 -10 -5.6170 19.5527   1 
   5  -9  10 -41.681 37.6419   2 
  -5   9 -10 -6.1658 16.0330   3 
   5   9  10 13.3849 21.2210   3 
   7  -9  10 31.0157 42.3786   2 
   7   9  10 43.8984 23.3078   3 
  -7   9 -10 22.3482 20.1954   3 
   8 -10 -10 72.5256 34.9703   1 
  -8 -10  10 54.9659 35.4618   2 
  -8  10  10 -12.492 18.2607   3 
   8  10 -10 4.90449 14.7489   3 
   6 -10 -10 64.7766 30.3495   1 
  -6 -10  10 41.0083 35.1447   2 
   6  10 -10 4.41705 15.3408   3 
  -6  10  10 22.9670 20.8356   3 
  -4 -10  10 40.6999 40.0839   2 
   4 -10 -10 97.2658 28.7496   1 
   4  10 -10 68.3158 20.9028   3 
  -4  10  10 71.1275 25.8848   3 
   2 -10 -10 16.4657 21.8334   1 
  -2 -10  10 28.5215 46.2537   2 
  -2  10  10 28.5073 21.5282   3 
   2  10 -10 -8.4570 17.0228   3 
   0 -10 -10 86.0275 26.3945   1 
   0 -10  10 2.95756 44.6333   2 
   0  10 -10 51.5308 21.6250   3 
   0  10  10 48.8700 24.8443   3 
  -2 -10 -10 4.14643 19.4042   1 
   2 -10  10 -7.4134 44.3457   2 
  -2  10 -10 53.4069 21.5962   3 
   2  10  10 26.6207 23.6770   3 
   4 -10  10 -42.200 42.4023   2 
  -4 -10 -10 -11.612 21.5604   1 
   4  10  10 33.6183 20.9005   3 
  -4  10 -10 -28.226 15.7563   3 
   6 -10  10 -35.332 43.5430   2 
   6  10  10 48.1456 26.1187   3 
  -6  10 -10 -10.770 17.6283   3 
  -7 -11  10 3.16998 32.5712   2 
   7 -11 -10 0.96398 28.3909   1 
   7  11 -10 27.0829 18.3504   3 
  -7  11  10 1.87097 20.1414   3 
  -5 -11  10 20.2441 38.3880   2 
   5 -11 -10 55.8424 29.2050   1 
  -5  11  10 2.81467 21.8543   3 
   5  11 -10 -12.170 16.0538   3 
   3 -11 -10 17.9340 22.9487   1 
  -3 -11  10 17.7670 44.2556   2 
  -3  11  10 39.2676 25.5612   3 
   3  11 -10 6.08857 17.7426   3 
  -1 -11  10 -2.1066 48.9185   2 
   1 -11 -10 -5.9034 21.5054   1 
   1  11 -10 -35.320 15.9736   3 
  -1  11  10 -4.1181 23.1970   3 
  -1 -11 -10 47.1466 24.0611   1 
   1 -11  10 90.9632 55.2312   2 
  -1  11 -10 11.4795 22.0916   3 
   1  11  10 -32.912 22.2877   3 
   3 -11  10 -67.343 45.5582   2 
  -3 -11 -10 23.2124 22.3805   1 
  -3  11 -10 0.68381 23.2160   3 
   3  11  10 -5.1114 22.0503   3 
  -4 -12  10 39.8058 45.5253   2 
   4 -12 -10 49.7787 27.7650   1 
   4  12 -10 -6.6536 17.9236   3 
  -4  12  10 62.8830 28.1463   3 
   2 -12 -10 43.9056 28.0392   1 
  -2 -12  10 -4.0717 48.2429   2 
  -2  12  10 -38.062 22.2065   3 
   2  12 -10 15.3529 20.3769   3 
   0 -12  10 57.3181 53.0192   2 
   0 -12 -10 15.5691 22.8171   1 
   0  12  10 35.8182 25.4586   3 
   0  12 -10 -31.940 19.2508   3 
   2 -12  10 31.7923 56.0558   2 
  -2  12 -10 64.3925 25.0286   3 
   2  12  10 5.29461 24.0477   3 
  12   0 -11 -11.268 30.0947   1 
 -12   0  11 111.552 30.0924   2 
  10   0 -11 137.172 34.8454   1 
   8   0 -11 8.90295 26.1477   1 
  -8   0  11 54.7194 23.2358   2 
  -8   0  11 -0.0470 12.7222   3 
   6   0 -11 269.101 37.6045   1 
  -6   0  11 228.464 27.9768   2 
  -6   0  11 305.186 28.8838   3 
  -4   0  11 24.5968 15.5455   2 
  -4   0  11 32.6039 16.8285   3 
   4   0 -11 21.3608 20.6940   1 
  -2   0  11 454.721 33.1422   2 
   2   0 -11 423.303 33.7989   1 
   2   0 -11 378.395 29.7025   3 
   0   0 -11 830.560 49.1184   1 
   0   0 -11 853.847 47.3418   3 
   0   0  11 771.292 49.5383   2 
  -2   0 -11 2.45766 12.4872   3 
   2   0  11 -10.152 17.7077   2 
  -2   0 -11 6.21243 14.2348   1 
   4   0  11 11.2051 15.7722   3 
  -4   0 -11 13.3784 13.7684   2 
  -4   0 -11 7.47767 15.9581   1 
  -6   0 -11 1161.80 66.3718   2 
  -6   0 -11 1118.56 66.1523   1 
   6   0  11 1086.83 66.2309   3 
  -8   0 -11 -0.7574 18.5856   2 
  -8   0 -11 23.3286 18.2662   1 
   8   0  11 9.03472 16.1113   3 
  10   0  11 161.262 35.8937   1 
 -10   0 -11 150.493 37.9585   2 
  13  -1 -11 -46.797 31.5537   1 
 -13  -1  11 47.6684 28.7998   2 
  13   1 -11 -23.601 30.3711   1 
 -13   1  11 -3.1702 25.7028   2 
  11  -1 -11 21.7030 31.4644   1 
 -11  -1  11 14.6490 23.8998   2 
 -11   1  11 17.8635 22.4291   2 
  11   1 -11 16.5557 30.2459   1 
  -9  -1  11 302.351 27.3705   3 
  -9  -1  11 364.212 38.7845   2 
   9  -1 -11 164.567 36.7166   1 
  -9   1  11 244.763 24.5523   3 
  -9   1  11 304.639 33.7101   2 
   9   1 -11 231.276 38.7497   1 
  -7  -1  11 -9.4480 12.2192   3 
   7  -1 -11 16.4959 26.4460   1 
  -7  -1  11 -2.7982 18.4626   2 
  -7   1  11 5.39178 12.3467   3 
   7   1 -11 2.24362 25.0166   1 
  -7   1  11 -5.9697 15.2702   2 
   5  -1 -11 172.443 31.8190   1 
  -5  -1  11 202.610 30.1028   2 
  -5   1  11 185.255 23.0002   2 
  -5   1  11 278.204 28.4734   3 
   5   1 -11 225.385 32.6412   1 
   5   1 -11 207.084 21.9216   3 
  -3  -1  11 410.260 35.8108   2 
   3  -1 -11 409.164 36.5831   1 
  -3   1  11 406.266 34.4054   3 
   3   1 -11 411.823 35.0913   1 
  -3   1  11 397.183 27.3434   2 
   3   1 -11 434.981 31.0998   3 
  -1  -1  11 306.020 35.4709   2 
   1  -1 -11 312.189 29.9642   1 
  -1   1  11 276.781 29.4299   3 
  -1   1  11 297.369 25.4255   2 
   1   1 -11 292.447 26.3670   3 
   1   1 -11 342.684 29.1586   1 
   1  -1  11 1097.62 63.8285   2 
  -1  -1 -11 1144.83 62.5423   1 
  -1   1 -11 1169.26 59.7249   1 
   1   1  11 1034.16 57.0161   2 
   1   1  11 1217.82 65.9065   3 
  -1   1 -11 1211.54 61.1303   3 
   3  -1  11 11.5257 21.5537   2 
  -3  -1 -11 -6.8516 14.8092   1 
  -3   1 -11 12.3991 13.4304   3 
  -3   1 -11 6.95651 14.8511   1 
   3   1  11 16.9782 15.6818   3 
  -5  -1 -11 88.0628 22.8862   1 
  -5  -1 -11 74.5389 19.5771   2 
  -5   1 -11 86.0033 21.6691   1 
  -5   1 -11 100.670 23.3264   2 
  -5   1 -11 101.343 20.7117   3 
   5   1  11 106.281 24.1061   3 
   7  -1  11 161.015 28.7230   3 
  -7  -1 -11 177.997 32.3528   1 
  -7  -1 -11 164.204 28.8818   2 
  -7   1 -11 120.748 29.6241   2 
  -7   1 -11 173.750 29.3376   1 
   7   1  11 151.054 25.9028   3 
  -9  -1 -11 -21.521 16.9470   2 
   9  -1  11 22.6082 21.7229   1 
   9   1  11 31.6279 21.0872   1 
  -9   1 -11 18.3675 25.8276   2 
  12  -2 -11 -25.154 30.6324   1 
 -12  -2  11 7.11231 25.5664   2 
  12   2 -11 -36.048 28.2928   1 
 -12   2  11 5.51849 22.5386   2 
  10  -2 -11 -7.2114 30.0253   1 
 -10  -2  11 48.5007 25.5133   2 
 -10   2  11 57.8281 24.1884   2 
  10   2 -11 42.0891 29.1565   1 
   8  -2 -11 55.0875 28.6828   1 
  -8  -2  11 58.2963 24.7800   2 
  -8   2  11 47.6011 20.3113   2 
  -8   2  11 62.5761 16.7286   3 
   8   2 -11 30.8690 25.5300   1 
  -6  -2  11 30.8342 22.8323   2 
   6  -2 -11 27.7052 26.9941   1 
   6   2 -11 39.0388 24.7348   1 
  -6   2  11 65.8493 17.6188   2 
  -6   2  11 47.7808 17.1207   3 
   6   2 -11 58.2959 15.4491   3 
  -4  -2  11 454.325 40.4785   2 
   4  -2 -11 429.667 41.1971   1 
   4   2 -11 484.021 32.8321   3 
   4   2 -11 562.113 40.2969   1 
  -4   2  11 454.463 36.3894   3 
  -4   2  11 456.600 28.5614   2 
  -2  -2  11 10.8600 25.1833   2 
   2  -2 -11 -26.328 15.1579   1 
   2   2 -11 -3.9396 10.9598   3 
   2   2 -11 -7.8147 13.4001   1 
  -2   2  11 0.31918 12.2953   3 
   0  -2 -11 776.973 50.2063   1 
   0  -2  11 820.375 57.8942   2 
   0   2 -11 809.780 45.0994   1 
   0   2 -11 742.206 45.7863   3 
   0   2  11 799.435 50.5776   3 
  -2  -2 -11 5.31013 16.6764   1 
   2  -2  11 -21.868 22.7769   2 
   2   2  11 20.1110 16.1632   3 
  -2   2 -11 6.65512 13.4799   1 
  -2   2 -11 13.3872 13.9560   3 
   2   2  11 13.3972 14.4247   2 
  -4  -2 -11 -20.175 15.4771   1 
   4  -2  11 47.2502 25.0814   2 
  -4  -2 -11 19.8433 12.2451   2 
   4   2  11 -28.704 12.7228   3 
  -4   2 -11 6.54067 14.4919   3 
  -4   2 -11 27.6027 15.6042   1 
  -6  -2 -11 439.372 34.9145   2 
  -6  -2 -11 439.605 39.3412   1 
  -6   2 -11 480.441 36.5694   3 
  -6   2 -11 347.678 40.0970   2 
   6   2  11 347.805 36.4031   3 
  -6   2 -11 410.979 35.7975   1 
   8  -2  11 143.887 30.3776   1 
  -8  -2 -11 135.506 28.4975   2 
  -8  -2 -11 112.833 28.4549   1 
   8   2  11 109.758 23.5327   3 
  -8   2 -11 131.576 33.1599   2 
  10  -2  11 123.451 31.9041   1 
  10   2  11 176.445 37.1594   1 
 -10   2 -11 53.3985 33.5142   2 
 -13  -3  11 27.4262 26.1496   2 
  13  -3 -11 -12.757 36.0105   1 
 -13   3  11 -9.8554 23.7815   2 
  13   3 -11 -46.559 28.9791   1 
  11  -3 -11 -33.851 31.0273   1 
 -11  -3  11 69.7877 29.4574   2 
 -11   3  11 -15.972 21.2114   2 
  11   3 -11 2.35064 27.1681   1 
  -9  -3  11 163.489 33.8971   2 
   9  -3 -11 70.1459 31.9554   1 
   9   3 -11 133.754 18.4436   3 
  -9   3  11 108.031 23.8991   2 
   9   3 -11 37.2395 28.1099   1 
  -9   3  11 135.242 20.8529   3 
  -7  -3  11 87.0872 30.5171   2 
   7  -3 -11 59.7132 29.5907   1 
   7   3 -11 70.7632 28.3346   1 
  -7   3  11 66.8891 18.9517   2 
  -7   3  11 59.9573 18.3873   3 
   7   3 -11 98.8206 17.6691   3 
   5  -3 -11 30.6175 25.5599   1 
  -5  -3  11 25.7797 25.7189   2 
  -5   3  11 42.8828 16.3958   3 
  -5   3  11 37.8946 12.1014   2 
   5   3 -11 33.0631 23.1428   1 
   5   3 -11 36.9473 13.3018   3 
  -3  -3  11 908.335 61.8035   2 
   3  -3 -11 799.847 54.7790   1 
   3   3 -11 873.489 50.1119   3 
   3   3 -11 956.165 50.7949   1 
  -3   3  11 982.382 54.9697   3 
  -1  -3  11 36.3447 29.4700   2 
   1  -3 -11 -25.483 14.5480   1 
   1   3 -11 1.21486 12.0796   1 
   1   3 -11 -5.1127 10.5444   3 
  -1   3  11 5.54785 15.9164   3 
  -1  -3 -11 611.840 46.4711   1 
   1  -3  11 632.219 54.8234   2 
   1   3  11 709.201 46.8162   3 
  -1   3 -11 678.262 43.1363   3 
  -1   3 -11 682.721 39.4484   1 
  -3  -3 -11 60.6951 20.8151   1 
   3  -3  11 58.2483 29.6694   2 
   3   3  11 41.2391 19.9081   3 
  -3   3 -11 64.6465 17.9786   3 
  -3   3 -11 74.8624 16.8032   1 
  -5  -3 -11 43.3263 21.5288   1 
   5  -3  11 69.9318 28.2796   2 
  -5   3 -11 25.7573 16.2669   1 
   5   3  11 45.4324 17.5420   3 
  -5   3 -11 20.3758 16.7344   3 
   7  -3  11 125.176 28.0210   1 
  -7  -3 -11 133.388 30.7815   1 
   7   3  11 134.333 25.0139   3 
  -7   3 -11 118.978 23.0834   3 
  -7   3 -11 100.224 32.3714   2 
  -9  -3 -11 23.1629 22.5062   1 
   9  -3  11 6.27066 19.6061   1 
  -9   3 -11 -2.5149 25.0152   2 
 -12  -4  11 43.1568 29.6609   2 
  12  -4 -11 -33.729 32.6800   1 
  12   4 -11 -67.257 25.0030   1 
 -12   4  11 33.0756 26.6770   2 
  10  -4 -11 97.1359 36.7358   1 
 -10  -4  11 251.299 42.3576   2 
  10   4 -11 114.136 32.8381   1 
 -10   4  11 149.833 29.9179   2 
   8  -4 -11 26.0612 28.8093   1 
  -8  -4  11 116.846 33.0521   2 
  -8   4  11 82.1987 18.8274   3 
   8   4 -11 81.8936 28.6408   1 
  -8   4  11 90.9487 22.1652   2 
   8   4 -11 83.6451 16.6697   3 
   6  -4 -11 235.393 39.4064   1 
  -6  -4  11 346.392 43.6584   2 
  -6   4  11 341.084 32.0243   3 
  -6   4  11 329.036 26.9944   2 
   6   4 -11 292.599 34.3196   1 
   6   4 -11 311.509 26.8180   3 
  -4  -4  11 233.883 41.6623   2 
   4  -4 -11 209.720 32.7745   1 
   4   4 -11 263.596 26.0464   3 
  -4   4  11 229.264 30.4009   3 
   4   4 -11 226.077 27.3040   1 
  -2  -4  11 61.2942 34.7117   2 
   2  -4 -11 13.4562 18.8773   1 
  -2   4  11 52.8279 20.0293   3 
   2   4 -11 19.4709 12.2745   1 
   2   4 -11 32.9422 13.6425   3 
   0  -4 -11 710.641 49.8837   1 
   0  -4  11 727.607 63.8844   2 
   0   4 -11 750.199 45.9258   3 
   0   4 -11 717.291 39.4427   1 
   0   4  11 785.234 50.3102   3 
   2  -4  11 31.6639 30.1083   2 
  -2  -4 -11 26.3655 18.7978   1 
  -2   4 -11 -6.3608 10.3221   1 
  -2   4 -11 -1.1170 13.1438   3 
   2   4  11 22.4406 17.9837   3 
   4  -4  11 -1.3436 26.7539   2 
  -4  -4 -11 23.7163 18.5875   1 
  -4   4 -11 28.1523 13.0778   1 
  -4   4 -11 14.2668 15.6692   3 
   4   4  11 11.2828 17.1629   3 
   6  -4  11 346.567 51.1437   2 
   6  -4  11 357.827 34.6433   1 
  -6  -4 -11 325.353 36.8482   1 
   6   4  11 328.973 34.3591   3 
  -6   4 -11 304.303 31.5143   3 
  -8  -4 -11 96.6519 28.7460   1 
   8  -4  11 63.0462 23.5883   1 
  -8   4 -11 -2.9431 26.6123   2 
   8   4  11 88.9097 32.1469   3 
  -8   4 -11 69.9459 21.7248   3 
 -11  -5  11 -2.0202 26.2562   2 
  11  -5 -11 -22.656 32.0656   1 
  11   5 -11 7.35731 28.9385   1 
 -11   5  11 11.7307 25.3005   2 
  -9  -5  11 142.783 36.5221   2 
   9  -5 -11 64.7879 32.9345   1 
   9   5 -11 133.161 19.9194   3 
  -9   5  11 115.588 21.2776   3 
  -9   5  11 128.410 28.4762   2 
   9   5 -11 90.9678 31.0092   1 
   7  -5 -11 11.4677 28.5474   1 
  -7  -5  11 5.00049 24.5065   2 
   7   5 -11 4.31867 11.9895   3 
   7   5 -11 -13.314 22.8233   1 
  -7   5  11 31.4357 16.2924   3 
  -5  -5  11 125.681 34.9538   2 
   5  -5 -11 92.3716 28.5210   1 
   5   5 -11 132.412 24.7220   1 
   5   5 -11 84.3989 17.8314   3 
  -5   5  11 110.432 22.9265   3 
   3  -5 -11 18.1656 21.1292   1 
  -3  -5  11 -5.4729 33.4725   2 
   3   5 -11 42.3144 14.8559   1 
  -3   5  11 15.9284 15.9949   3 
   3   5 -11 43.8579 15.2988   3 
   1  -5 -11 253.763 34.9537   1 
  -1  -5  11 296.114 49.9949   2 
   1   5 -11 325.966 22.0319   1 
   1   5 -11 322.682 29.2063   3 
  -1   5  11 335.170 33.6863   3 
  -1  -5 -11 649.449 49.2395   1 
   1  -5  11 603.309 64.0903   2 
   1   5  11 733.079 49.3505   3 
  -1   5 -11 721.440 45.6687   3 
  -3  -5 -11 87.8992 23.8902   1 
   3  -5  11 67.2703 34.6025   2 
  -3   5 -11 93.5205 20.7517   3 
   3   5  11 101.578 22.5120   3 
  -5  -5 -11 80.6419 26.6882   1 
   5  -5  11 98.7088 36.3779   2 
   5   5  11 130.466 25.5277   3 
  -5   5 -11 153.186 26.5652   3 
  -7  -5 -11 113.925 30.6789   1 
   7  -5  11 173.645 41.3596   2 
  -7   5 -11 146.436 26.6523   3 
   7   5  11 128.679 24.6247   3 
  -9   5 -11 -9.6448 32.4665   2 
 -12  -6  11 29.2654 30.3574   2 
 -10  -6  11 36.6185 29.7889   2 
  10  -6 -11 18.6880 35.1353   1 
  10   6 -11 -39.332 25.1309   1 
  -8  -6  11 24.5950 29.2123   2 
   8  -6 -11 8.14798 29.7850   1 
   8   6 -11 -28.540 24.7046   1 
   8   6 -11 16.6287 12.9164   3 
  -8   6  11 14.9213 16.4273   3 
  -6  -6  11 16.2807 29.0345   2 
   6  -6 -11 4.03581 24.6626   1 
  -6   6  11 25.5968 17.8578   3 
   6   6 -11 -20.585 19.4323   1 
   6   6 -11 32.2709 14.6511   3 
  -4  -6  11 143.365 40.1770   2 
   4  -6 -11 130.676 29.4802   1 
  -4   6  11 116.614 24.6297   3 
   4   6 -11 98.6387 19.5290   3 
   2  -6 -11 2.26304 17.8216   1 
  -2  -6  11 -9.6883 36.7107   2 
  -2   6  11 -10.437 16.5706   3 
   2   6 -11 33.0170 15.9862   3 
   0  -6  11 247.373 50.6820   2 
   0  -6 -11 235.299 34.9578   1 
   0   6 -11 287.015 28.9197   3 
   0   6  11 247.239 32.2844   3 
  -2  -6 -11 16.0060 18.9574   1 
   2  -6  11 9.11726 34.1802   2 
   2   6  11 35.6885 19.9799   3 
  -2   6 -11 14.8579 14.7210   3 
   4  -6  11 -9.6559 32.0246   2 
  -4  -6 -11 7.33018 17.4701   1 
   4   6  11 -9.2065 15.4150   3 
  -4   6 -11 17.1742 17.9628   3 
   6  -6  11 322.880 53.6912   2 
  -6  -6 -11 368.897 39.8123   1 
  -6   6 -11 323.564 33.5765   3 
   6   6  11 383.103 37.4524   3 
  -8  -6 -11 3.86282 21.5203   1 
   8  -6  11 34.8328 32.1830   2 
  -8   6 -11 -34.345 16.6062   3 
  11  -7 -11 13.9291 38.1235   1 
 -11  -7  11 48.2762 31.8413   2 
   9  -7 -11 33.7789 33.5238   1 
  -9  -7  11 49.1582 30.9908   2 
   9   7 -11 45.9387 15.4804   3 
  -9   7  11 108.733 24.0331   3 
   7  -7 -11 13.6586 29.4905   1 
  -7  -7  11 12.4238 28.8862   2 
   7   7 -11 -8.6164 11.9807   3 
  -7   7  11 26.9588 19.0642   3 
  -5  -7  11 72.7053 36.7705   2 
   5  -7 -11 1.63047 21.8171   1 
  -5   7  11 44.3371 21.1663   3 
   5   7 -11 39.7508 15.5567   3 
   3  -7 -11 164.915 30.9898   1 
  -3  -7  11 210.076 48.5471   2 
   3   7 -11 243.662 26.9986   3 
  -3   7  11 272.278 35.2367   3 
  -1  -7  11 -17.393 36.6847   2 
   1  -7 -11 5.51960 20.2389   1 
   1   7 -11 -3.7136 14.4016   3 
  -1   7  11 36.7121 19.4820   3 
   1  -7  11 100.217 45.1122   2 
  -1  -7 -11 137.791 29.6595   1 
  -1   7 -11 138.788 24.4845   3 
   1   7  11 149.704 28.5505   3 
   3  -7  11 19.6827 38.5249   2 
  -3  -7 -11 18.3850 20.6485   1 
   3   7  11 7.33849 19.4023   3 
  -3   7 -11 9.36197 16.1223   3 
  -5  -7 -11 3.56941 20.7301   1 
   5   7  11 6.11931 18.3165   3 
  -5   7 -11 41.4034 20.1708   3 
  -7  -7 -11 26.5654 24.0823   1 
   7  -7  11 48.0512 38.4381   2 
  -7   7 -11 -0.9818 20.0820   3 
   7   7  11 55.1471 21.6517   3 
 -10  -8  11 62.1495 33.1650   2 
  10  -8 -11 37.7500 38.1557   1 
  -8  -8  11 87.4872 35.1480   2 
   8  -8 -11 47.5349 31.2208   1 
  -8   8  11 32.8666 20.1600   3 
   8   8 -11 -5.3150 13.2996   3 
   6  -8 -11 27.8306 27.4808   1 
  -6  -8  11 46.8159 34.7577   2 
  -6   8  11 40.5090 20.9992   3 
   6   8 -11 20.4030 14.4504   3 
   4  -8 -11 12.6048 23.6857   1 
  -4  -8  11 31.4358 39.1915   2 
   4   8 -11 18.8733 16.0140   3 
  -4   8  11 15.1741 19.7333   3 
   2  -8 -11 32.5767 22.0765   1 
  -2  -8  11 15.1581 40.1319   2 
  -2   8  11 26.9773 21.6380   3 
   2   8 -11 43.8594 18.4093   3 
   0  -8  11 79.7473 47.3586   2 
   0  -8 -11 73.7584 25.3397   1 
   0   8 -11 115.093 23.3611   3 
   0   8  11 75.0108 26.8983   3 
  -2  -8 -11 15.4214 20.3362   1 
   2  -8  11 -53.467 37.1410   2 
  -2   8 -11 -5.1379 17.7642   3 
   2   8  11 3.65666 19.3990   3 
   4  -8  11 9.41357 39.0897   2 
  -4  -8 -11 -9.2976 17.3424   1 
   4   8  11 4.80719 19.7298   3 
  -4   8 -11 7.80902 18.4524   3 
  -6  -8 -11 165.779 36.0580   1 
   6  -8  11 132.047 50.2498   2 
   6   8  11 167.740 30.7214   3 
  -6   8 -11 176.898 28.4334   3 
   9  -9 -11 81.6740 36.6720   1 
  -9  -9  11 58.1341 34.5852   2 
  -9   9  11 27.3023 21.2758   3 
   7  -9 -11 21.6930 27.6308   1 
  -7  -9  11 5.41463 28.7922   2 
   7   9 -11 -12.756 14.1347   3 
  -7   9  11 -17.684 17.7291   3 
  -5  -9  11 89.9466 41.1342   2 
   5  -9 -11 50.2670 25.8604   1 
   5   9 -11 18.6531 16.6947   3 
  -5   9  11 59.0971 24.6480   3 
  -3  -9  11 -12.579 39.6329   2 
   3  -9 -11 55.2549 25.6413   1 
  -3   9  11 27.5269 23.3323   3 
   3   9 -11 17.9323 17.6688   3 
  -1  -9  11 47.2173 46.2565   2 
   1  -9 -11 -5.4755 20.5006   1 
   1   9 -11 24.4493 18.3207   3 
  -1   9  11 15.8061 22.9400   3 
   1  -9  11 47.9666 47.7936   2 
  -1  -9 -11 121.437 28.1948   1 
   1   9  11 134.016 29.6323   3 
  -1   9 -11 149.363 27.0463   3 
  -3  -9 -11 -3.6677 20.4063   1 
   3  -9  11 -39.472 39.9679   2 
   3   9  11 5.11950 21.8285   3 
  -3   9 -11 1.40059 18.0563   3 
  -5  -9 -11 -7.2402 20.0408   1 
   5  -9  11 16.8277 43.7491   2 
  -5   9 -11 15.2952 19.8184   3 
   5   9  11 12.7998 20.4327   3 
   8 -10 -11 14.8341 28.5452   1 
  -8 -10  11 2.73496 30.5750   2 
  -8  10  11 -10.694 20.2890   3 
   8  10 -11 -8.4259 14.9436   3 
  -6 -10  11 46.8515 36.3550   2 
   6 -10 -11 42.1733 27.5443   1 
  -6  10  11 2.81784 22.4645   3 
   6  10 -11 51.8638 18.4591   3 
   4 -10 -11 64.4427 27.5209   1 
  -4 -10  11 53.2482 42.8952   2 
  -4  10  11 91.9540 28.6167   3 
   4  10 -11 56.8397 19.4185   3 
  -2 -10  11 -53.508 43.4281   2 
   2 -10 -11 14.9571 22.4183   1 
  -2  10  11 -34.440 18.8877   3 
   2  10 -11 29.1997 19.7563   3 
   0 -10  11 73.0707 51.7156   2 
   0 -10 -11 114.650 28.8074   1 
   0  10 -11 125.382 27.2024   3 
   0  10  11 138.157 31.6334   3 
  -2 -10 -11 39.1455 24.1144   1 
   2 -10  11 -9.0642 48.4559   2 
   2  10  11 21.4444 23.2810   3 
  -2  10 -11 -7.8389 19.1064   3 
  -4 -10 -11 -38.208 19.8412   1 
   4 -10  11 4.59057 47.2103   2 
  -4  10 -11 26.6490 22.6064   3 
   4  10  11 7.87620 23.8407   3 
   5 -11 -11 12.9674 25.8027   1 
  -5 -11  11 -9.5319 37.4408   2 
  -5  11  11 9.15434 24.5122   3 
   5  11 -11 27.1706 19.1364   3 
  -3 -11  11 -0.3462 44.7292   2 
   3 -11 -11 11.2266 23.4830   1 
  -3  11  11 24.0030 24.5569   3 
   3  11 -11 10.7068 18.1933   3 
  -1 -11  11 6.89157 50.4189   2 
   1 -11 -11 26.9563 24.5410   1 
   1  11 -11 35.8210 21.4931   3 
  -1  11  11 4.89514 24.5682   3 
   1 -11  11 -10.827 54.1165   2 
  -1 -11 -11 24.9417 22.6786   1 
   1  11  11 -5.6330 24.4301   3 
  -1  11 -11 13.6226 22.2422   3 
   3 -11  11 -52.073 49.7672   2 
   3  11  11 56.2430 26.4933   3 
  -3  11 -11 38.9658 23.6587   3 
   4  12 -11 45.4404 20.5550   3 
  -4  12  11 18.1926 27.9318   3 
  -2 -12  11 6.41135 52.5172   2 
  -2  12  11 20.2270 28.6978   3 
   2  12 -11 11.8401 20.5401   3 
   0 -12  11 -81.242 50.0948   2 
   0  12 -11 39.2979 21.8120   3 
   0  12  11 25.1340 27.5175   3 
 -12   0  12 80.6092 28.6344   2 
  12   0 -12 -20.713 31.5205   1 
  10   0 -12 54.5720 33.8337   1 
 -10   0  12 92.2986 28.6444   2 
   8   0 -12 6.62586 25.8185   1 
  -8   0  12 8.25760 19.8265   2 
  -8   0  12 23.4729 14.6534   3 
  -6   0  12 516.507 38.1744   3 
   6   0 -12 396.319 44.8318   1 
  -6   0  12 415.967 36.9578   2 
  -4   0  12 199.199 27.7277   3 
   4   0 -12 200.200 31.4166   1 
  -4   0  12 176.015 25.6114   2 
  -2   0  12 35.4084 19.1576   2 
   2   0 -12 8.63030 16.9095   1 
   0   0  12 153.795 27.6868   2 
   0   0 -12 116.585 20.5142   3 
   0   0 -12 170.728 26.4232   1 
   2   0  12 97.1284 25.9705   2 
  -2   0 -12 179.596 26.7620   1 
   2   0  12 124.566 25.0038   3 
  -4   0 -12 355.524 35.3157   1 
   4   0  12 413.290 37.8281   2 
   4   0  12 320.599 35.5762   3 
  -6   0 -12 277.173 37.3019   1 
   6   0  12 263.716 35.7264   3 
  -6   0 -12 276.583 32.4116   2 
  -8   0 -12 163.320 33.9464   2 
   8   0  12 160.436 29.1767   3 
  -8   0 -12 163.207 31.3453   1 
  13  -1 -12 -36.839 34.7357   1 
 -13  -1  12 70.9387 32.1917   2 
  13   1 -12 -12.283 34.1495   1 
 -13   1  12 -18.245 23.9184   2 
  11  -1 -12 91.7114 39.1406   1 
 -11  -1  12 190.911 38.2278   2 
  11   1 -12 31.1484 34.5814   1 
 -11   1  12 189.442 36.7950   2 
  -9  -1  12 129.575 23.2373   3 
   9  -1 -12 78.0574 32.9859   1 
  -9  -1  12 167.202 33.9310   2 
   9   1 -12 57.5262 32.5621   1 
  -9   1  12 105.808 26.7091   2 
  -9   1  12 93.1866 18.4338   3 
  -7  -1  12 1.91722 14.5226   3 
   7  -1 -12 33.3437 26.7122   1 
  -7  -1  12 14.4873 19.1438   2 
  -7   1  12 -4.2540 15.6271   2 
   7   1 -12 -6.9908 25.2321   1 
  -7   1  12 26.8473 16.7051   3 
  -5  -1  12 1070.29 61.4820   2 
   5  -1 -12 874.920 63.2729   1 
  -5   1  12 1158.57 62.0782   3 
   5   1 -12 1037.61 63.1303   1 
   5   1 -12 1000.83 54.9851   3 
  -5   1  12 1026.29 55.2535   2 
  -3  -1  12 2.18565 20.3320   2 
   3  -1 -12 25.1045 20.7548   1 
  -3   1  12 22.4350 13.3867   2 
  -3   1  12 33.1794 17.6851   3 
   3   1 -12 22.6435 19.1335   1 
   3   1 -12 8.55199 12.5007   3 
   1  -1 -12 182.376 28.3734   1 
  -1  -1  12 180.312 32.0448   2 
   1   1 -12 170.214 25.7758   1 
   1   1 -12 223.291 25.9479   3 
  -1   1  12 193.533 23.3079   2 
  -1   1  12 157.787 26.4660   3 
  -1  -1 -12 441.791 36.8353   1 
   1  -1  12 428.389 42.7652   2 
   1   1  12 401.912 35.4998   2 
  -1   1 -12 441.267 35.0407   3 
   1   1  12 434.595 38.7782   3 
  -1   1 -12 427.426 33.6918   1 
  -3  -1 -12 9.73077 16.5534   1 
   3  -1  12 38.0512 23.8965   2 
  -3   1 -12 52.4504 18.7202   1 
   3   1  12 68.4096 20.7025   2 
   3   1  12 19.0680 17.5536   3 
  -3   1 -12 38.8587 16.6069   3 
  -5  -1 -12 -0.9596 14.9556   2 
  -5  -1 -12 33.3331 19.6828   1 
   5   1  12 9.59159 18.3963   3 
  -5   1 -12 58.1122 20.2162   1 
   7  -1  12 295.611 37.1287   3 
  -7  -1 -12 333.564 42.5104   1 
  -7  -1 -12 302.731 39.6536   2 
   7   1  12 219.128 32.6581   3 
  -7   1 -12 265.408 39.7449   2 
  -7   1 -12 303.533 34.1649   1 
   9  -1  12 26.7502 22.7621   1 
  -9   1 -12 14.7749 24.9335   2 
   9   1  12 61.8196 24.7489   1 
  12  -2 -12 -58.043 31.7905   1 
 -12  -2  12 19.1346 24.4676   2 
 -12   2  12 17.9953 23.2753   2 
  12   2 -12 -53.679 29.7584   1 
  10  -2 -12 -22.549 30.4618   1 
 -10  -2  12 60.1401 29.9411   2 
 -10   2  12 43.9442 22.1516   2 
  10   2 -12 20.2790 31.5331   1 
   8  -2 -12 13.5681 28.4347   1 
  -8  -2  12 27.1858 22.9236   2 
  -8   2  12 33.9088 16.7734   3 
   8   2 -12 -3.9688 27.3239   1 
  -8   2  12 2.94973 16.7319   2 
  -6  -2  12 184.505 32.1321   2 
   6  -2 -12 125.497 33.0086   1 
   6   2 -12 165.512 32.0503   1 
  -6   2  12 141.392 24.3973   3 
   6   2 -12 210.231 24.9657   3 
  -6   2  12 165.101 23.8729   2 
  -4  -2  12 46.4784 24.7180   2 
   4  -2 -12 35.9833 23.9648   1 
  -4   2  12 27.3294 11.2982   2 
   4   2 -12 49.8951 22.6886   1 
  -4   2  12 57.2430 20.5998   3 
   4   2 -12 52.1390 16.3478   3 
   2  -2 -12 937.124 58.3608   1 
  -2  -2  12 919.281 61.9575   2 
  -2   2  12 963.323 58.3338   3 
   2   2 -12 1087.54 55.3487   3 
   2   2 -12 940.579 53.3074   1 
   0  -2  12 349.702 44.3172   2 
   0  -2 -12 317.313 33.3116   1 
   0   2  12 319.224 33.9339   3 
   0   2 -12 303.404 28.5242   3 
   0   2 -12 294.342 27.6481   1 
   2  -2  12 -20.419 23.5204   2 
  -2  -2 -12 -1.9108 16.8481   1 
  -2   2 -12 28.9911 15.7818   3 
  -2   2 -12 -2.5502 12.1592   1 
   2   2  12 -0.4988 15.8478   3 
   4  -2  12 160.761 33.6353   2 
  -4  -2 -12 130.966 28.5438   1 
   4   2  12 105.106 24.8929   3 
  -4   2 -12 144.571 24.5251   1 
  -4   2 -12 151.475 26.2545   3 
  -6  -2 -12 28.0498 19.8334   1 
  -6   2 -12 48.1773 21.2274   1 
  -6   2 -12 76.7490 21.0338   3 
   6   2  12 23.9639 17.6216   3 
  -6   2 -12 25.7962 22.1699   2 
   8  -2  12 86.2046 24.7056   3 
   8  -2  12 90.6522 25.7090   1 
  -8  -2 -12 108.738 28.1357   1 
  -8   2 -12 78.1463 32.3459   2 
   8   2  12 87.8349 25.1451   3 
 -11  -3  12 127.216 35.0118   2 
  11  -3 -12 -10.287 31.0895   1 
 -11   3  12 35.9568 25.3236   2 
  11   3 -12 -4.2376 30.0359   1 
   9  -3 -12 27.5151 31.6427   1 
  -9  -3  12 109.640 30.5744   2 
  -9   3  12 79.1711 24.1031   2 
   9   3 -12 56.5178 31.1116   1 
   9   3 -12 80.4239 16.6543   3 
  -9   3  12 92.3147 19.7341   3 
   7  -3 -12 35.0751 27.9240   1 
  -7  -3  12 58.8835 26.4255   2 
  -7   3  12 32.7492 16.6300   2 
  -7   3  12 35.5781 17.5553   3 
   7   3 -12 15.0258 25.4715   1 
   7   3 -12 60.5502 16.8674   3 
  -5  -3  12 211.934 37.0583   2 
   5  -3 -12 225.032 36.3694   1 
   5   3 -12 203.187 23.4128   3 
  -5   3  12 184.059 27.9744   3 
   5   3 -12 224.152 31.8261   1 
  -3  -3  12 77.0606 32.4183   2 
   3  -3 -12 31.7566 21.4644   1 
   3   3 -12 96.6631 18.4362   3 
  -3   3  12 65.1547 20.5389   3 
   3   3 -12 96.8592 20.7804   1 
  -1  -3  12 65.6197 33.0344   2 
   1  -3 -12 17.2795 17.8186   1 
  -1   3  12 57.1785 20.5383   3 
   1   3 -12 46.4737 16.7139   1 
   1   3 -12 30.3418 15.5251   3 
  -1  -3 -12 141.319 27.9154   1 
   1  -3  12 117.936 35.6471   2 
  -1   3 -12 172.847 22.2382   1 
   1   3  12 152.422 25.7642   3 
  -1   3 -12 139.637 22.7572   3 
   3  -3  12 -23.487 24.4565   2 
  -3  -3 -12 16.0029 17.5795   1 
   3   3  12 -1.4222 15.7186   3 
  -3   3 -12 43.1579 14.4879   1 
  -3   3 -12 5.57030 15.3847   3 
  -5  -3 -12 25.4930 20.2061   1 
   5  -3  12 36.6700 28.3125   2 
  -5   3 -12 -9.8000 14.9406   3 
   5   3  12 -4.0417 15.8070   3 
  -5   3 -12 25.2735 15.2342   1 
   7  -3  12 296.316 35.3209   1 
  -7  -3 -12 221.109 37.7630   1 
  -7   3 -12 243.965 33.2661   3 
   7   3  12 197.471 30.8691   3 
   9  -3  12 44.9790 25.5192   1 
  -9   3 -12 2.67426 29.4399   2 
  12  -4 -12 -52.327 33.3838   1 
 -12  -4  12 29.7290 29.5561   2 
 -12   4  12 4.54637 23.5262   2 
  12   4 -12 -7.4479 33.3291   1 
  10  -4 -12 81.6800 36.2072   1 
 -10  -4  12 115.690 34.5059   2 
 -10   4  12 75.2109 25.2815   2 
  10   4 -12 20.3045 31.5712   1 
  -8  -4  12 44.0117 26.8577   2 
   8  -4 -12 24.9930 29.0824   1 
  -8   4  12 66.3107 18.8435   3 
   8   4 -12 -28.541 25.3383   1 
   8   4 -12 28.2490 14.0465   3 
   6  -4 -12 510.759 49.7468   1 
  -6  -4  12 524.900 50.8208   2 
  -6   4  12 540.339 41.1632   3 
   6   4 -12 563.921 45.9320   1 
   6   4 -12 598.838 38.6697   3 
   4  -4 -12 19.3116 20.8666   1 
  -4  -4  12 5.10465 28.4693   2 
   4   4 -12 -3.5382 15.7165   1 
  -4   4  12 0.41516 16.7397   3 
   4   4 -12 9.66931 13.3636   3 
   2  -4 -12 2.27278 18.9653   1 
  -2  -4  12 -8.3304 31.8890   2 
   2   4 -12 2.95423 12.6774   3 
   2   4 -12 -6.5278 11.8198   1 
  -2   4  12 11.1506 18.2327   3 
   0  -4 -12 27.5110 18.9574   1 
   0  -4  12 -0.7619 33.8163   2 
   0   4 -12 -3.0799 10.2828   1 
   0   4 -12 26.1175 14.7004   3 
   0   4  12 0.15568 16.8224   3 
  -2  -4 -12 49.1289 21.6022   1 
   2  -4  12 50.4947 32.2281   2 
  -2   4 -12 8.20509 14.9858   3 
  -2   4 -12 42.0788 13.3102   1 
   2   4  12 51.1902 21.1900   3 
   4  -4  12 35.7084 31.7458   2 
  -4  -4 -12 32.5889 20.4321   1 
   4   4  12 38.9464 20.5507   3 
  -4   4 -12 28.1439 17.6167   3 
  -4   4 -12 11.3102 13.5444   1 
   6  -4  12 50.9602 20.8000   1 
   6  -4  12 100.636 35.0967   2 
  -6  -4 -12 95.3784 25.9684   1 
   6   4  12 17.7728 18.7446   3 
  -8  -4 -12 21.6552 21.6974   1 
  -8   4 -12 -3.1697 16.7183   3 
 -11  -5  12 38.8373 29.3267   2 
  11  -5 -12 -5.3471 34.8703   1 
  11   5 -12 -40.566 30.2064   1 
  -9  -5  12 91.3474 32.1045   2 
   9   5 -12 -34.519 26.4855   1 
   9   5 -12 -8.6103 12.3531   3 
  -9   5  12 18.6607 17.6311   3 
  -7  -5  12 1.09317 25.1094   2 
   7  -5 -12 26.2040 28.9003   1 
   7   5 -12 5.59710 12.3633   3 
  -7   5  12 44.9839 17.7581   3 
   7   5 -12 -7.9704 23.9981   1 
   5  -5 -12 354.926 42.7533   1 
  -5  -5  12 424.286 48.4573   2 
   5   5 -12 521.027 37.9376   1 
   5   5 -12 462.983 34.9119   3 
  -5   5  12 456.402 38.8946   3 
   3  -5 -12 -17.677 17.8628   1 
  -3  -5  12 21.6566 33.6649   2 
   3   5 -12 13.3602 12.2875   1 
   3   5 -12 -0.1725 13.6872   3 
  -3   5  12 -7.8695 15.9945   3 
   1  -5 -12 17.8544 18.9544   1 
  -1  -5  12 39.2397 36.8872   2 
  -1   5  12 34.3778 17.9348   3 
   1   5 -12 47.6323 15.2703   3 
  -1  -5 -12 151.021 29.1943   1 
   1  -5  12 144.956 41.6068   2 
  -1   5 -12 120.160 22.7157   3 
   1   5  12 150.457 28.3018   3 
  -3  -5 -12 29.0616 19.8711   1 
   3  -5  12 56.9968 35.8632   2 
  -3   5 -12 33.6807 18.1243   3 
   3   5  12 47.8250 20.1147   3 
   5  -5  12 25.0047 32.8113   2 
  -5  -5 -12 69.2995 26.9377   1 
   5   5  12 35.0175 19.7390   3 
  -5   5 -12 18.2261 19.0506   3 
   7  -5  12 204.578 46.1534   2 
  -7  -5 -12 235.514 40.5317   1 
  -7   5 -12 190.470 29.0817   3 
   7   5  12 193.190 31.9834   3 
 -10  -6  12 54.5628 31.6919   2 
  10  -6 -12 45.1179 36.7147   1 
  10   6 -12 -43.906 29.4683   1 
   8  -6 -12 24.0172 30.2516   1 
  -8  -6  12 6.96145 28.7001   2 
   8   6 -12 -4.3565 13.1519   3 
   8   6 -12 -23.998 29.1468   1 
  -8   6  12 18.7448 16.7994   3 
   6  -6 -12 27.4155 27.7308   1 
  -6  -6  12 22.7285 29.2133   2 
   6   6 -12 6.46915 13.8065   3 
  -6   6  12 48.0355 19.2263   3 
  -4  -6  12 11.9282 34.1732   2 
   4  -6 -12 16.2075 22.4534   1 
   4   6 -12 -2.2392 12.2151   3 
  -4   6  12 18.0160 18.2297   3 
   2  -6 -12 198.736 33.9103   1 
  -2  -6  12 222.625 49.2887   2 
  -2   6  12 263.638 34.5776   3 
   2   6 -12 274.303 28.7155   3 
   0  -6  12 446.546 62.0777   2 
   0  -6 -12 449.036 43.5228   1 
   0   6 -12 490.444 38.4770   3 
   0   6  12 542.575 44.0017   3 
   2  -6  12 93.2420 41.8678   2 
  -2  -6 -12 109.142 27.1354   1 
  -2   6 -12 96.5725 21.7602   3 
   2   6  12 128.407 26.3263   3 
   4  -6  12 146.094 45.4008   2 
  -4  -6 -12 195.477 34.5023   1 
  -4   6 -12 193.705 27.4638   3 
   4   6  12 134.739 27.8895   3 
   6  -6  12 48.1746 35.5316   2 
  -6  -6 -12 64.4126 25.4583   1 
  -6   6 -12 76.8738 24.4591   3 
   6   6  12 54.5168 22.5280   3 
 -11  -7  12 85.4261 34.9882   2 
   9  -7 -12 33.4881 34.5926   1 
  -9  -7  12 64.5361 31.6400   2 
  -9   7  12 43.9769 20.6765   3 
   9   7 -12 49.5674 17.8520   3 
   7  -7 -12 -5.9727 28.4796   1 
  -7  -7  12 39.5392 29.9572   2 
  -7   7  12 22.4378 20.7303   3 
   7   7 -12 -17.061 11.7624   3 
   5  -7 -12 103.588 30.4660   1 
  -5  -7  12 135.049 40.8427   2 
  -5   7  12 196.437 31.8811   3 
   5   7 -12 154.000 23.2709   3 
   3  -7 -12 18.9185 21.2030   1 
  -3  -7  12 144.384 45.1542   2 
  -3   7  12 -1.5336 20.0766   3 
   3   7 -12 -1.5135 14.1889   3 
  -1  -7  12 122.423 46.0977   2 
   1  -7 -12 90.8533 27.1485   1 
   1   7 -12 136.598 24.6535   3 
  -1   7  12 141.135 28.6456   3 
   1  -7  12 140.519 49.9322   2 
  -1  -7 -12 142.063 30.0498   1 
  -1   7 -12 235.631 30.8616   3 
   1   7  12 243.007 34.2002   3 
   3  -7  12 51.4315 41.2362   2 
  -3  -7 -12 -3.3467 19.6180   1 
   3   7  12 2.97678 17.6186   3 
  -3   7 -12 30.8841 19.3264   3 
   5  -7  12 -46.630 35.0576   2 
  -5  -7 -12 23.6113 23.2596   1 
  -5   7 -12 -15.603 17.4672   3 
   5   7  12 -2.4450 21.2306   3 
  -7  -7 -12 45.9210 26.8090   1 
   7  -7  12 105.126 45.6541   2 
  -7   7 -12 -3.1811 20.0824   3 
   7   7  12 56.3483 25.3915   3 
 -10  -8  12 65.6728 33.1616   2 
  -8  -8  12 4.54586 28.2361   2 
   8  -8 -12 18.5163 30.0839   1 
   8   8 -12 -6.4776 13.0432   3 
  -8   8  12 -25.565 18.4035   3 
   6  -8 -12 20.2424 27.1680   1 
  -6  -8  12 46.4609 33.8539   2 
  -6   8  12 93.5740 24.5556   3 
   6   8 -12 89.0168 20.1156   3 
   4  -8 -12 30.4749 24.2323   1 
  -4  -8  12 14.4735 38.2189   2 
   4   8 -12 -18.810 14.0960   3 
  -4   8  12 6.81977 20.2216   3 
   2  -8 -12 5.96736 19.7371   1 
  -2  -8  12 37.2988 45.7611   2 
   2   8 -12 -13.235 14.8905   3 
   0  -8  12 12.2991 45.0622   2 
   0  -8 -12 -10.032 19.1327   1 
   0   8  12 1.83535 20.3620   3 
   0   8 -12 0.19627 15.9883   3 
  -2  -8 -12 42.7426 24.1367   1 
   2  -8  12 9.51883 44.0392   2 
  -2   8 -12 32.8426 21.1532   3 
   2   8  12 49.1643 24.7640   3 
  -4  -8 -12 1.78174 21.6116   1 
   4  -8  12 -14.954 39.3793   2 
  -4   8 -12 45.6761 21.3685   3 
   4   8  12 -7.0089 19.2034   3 
   6  -8  12 64.6245 46.7916   2 
  -6  -8 -12 98.7469 30.2790   1 
   6   8  12 72.6846 26.0131   3 
  -6   8 -12 53.9785 24.9321   3 
  -9  -9  12 65.9358 37.7974   2 
  -9   9  12 19.2253 23.7745   3 
   7  -9 -12 13.5611 27.2148   1 
  -7  -9  12 26.0111 31.3779   2 
   7   9 -12 12.4115 15.9354   3 
  -7   9  12 -1.0401 21.0025   3 
  -5  -9  12 72.8707 40.2859   2 
   5  -9 -12 60.7726 27.9243   1 
  -5   9  12 25.1920 22.6293   3 
   5   9 -12 65.9252 20.7982   3 
  -3  -9  12 -38.692 39.7074   2 
   3  -9 -12 -10.476 20.8788   1 
  -3   9  12 -11.137 20.6923   3 
   3   9 -12 2.22320 17.0809   3 
  -1  -9  12 -46.068 42.0945   2 
   1  -9 -12 -11.344 20.3465   1 
   1   9 -12 8.86777 18.7059   3 
  -1   9  12 -19.672 21.7755   3 
  -1  -9 -12 -2.7946 20.4595   1 
   1  -9  12 -45.406 44.0482   2 
   1   9  12 4.99452 22.4300   3 
  -1   9 -12 -5.8674 17.7200   3 
   3  -9  12 -52.179 43.3308   2 
  -3  -9 -12 21.8377 21.9493   1 
  -3   9 -12 1.38901 18.4876   3 
   3   9  12 -3.6064 21.8868   3 
  -5  -9 -12 2.49215 23.5439   1 
   5  -9  12 -7.5369 46.4080   2 
  -5   9 -12 5.15711 20.3077   3 
   5   9  12 -1.4398 21.5942   3 
   6 -10 -12 53.9508 29.3948   1 
  -6 -10  12 66.5264 38.0541   2 
   6  10 -12 20.1428 16.6923   3 
  -6  10  12 52.6095 24.8115   3 
   4 -10 -12 22.9787 25.5228   1 
  -4 -10  12 30.1741 41.4763   2 
   4  10 -12 -9.2205 15.0951   3 
  -4  10  12 26.5808 25.9563   3 
   2 -10 -12 5.68370 23.8810   1 
  -2 -10  12 -26.239 45.7905   2 
  -2  10  12 18.9769 24.0246   3 
   2  10 -12 25.5052 19.7628   3 
   0 -10  12 24.9638 48.5069   2 
   0 -10 -12 34.0957 23.7215   1 
   0  10  12 36.1669 25.2425   3 
   0  10 -12 52.4472 22.9181   3 
  -2 -10 -12 25.7151 22.2242   1 
   2 -10  12 -51.689 46.5033   2 
   2  10  12 -19.571 20.7195   3 
  -2  10 -12 34.0878 23.2608   3 
   4 -10  12 7.83131 52.4884   2 
   4  10  12 -14.728 21.9876   3 
  -4  10 -12 -9.9871 20.6904   3 
  -5 -11  12 33.2710 41.2325   2 
   5 -11 -12 18.9235 26.4174   1 
   5  11 -12 5.23929 18.0263   3 
  -5  11  12 33.1002 27.4944   3 
  -3 -11  12 -33.787 43.4276   2 
   3 -11 -12 21.1013 26.0376   1 
  -3  11  12 31.4877 24.5876   3 
   3  11 -12 7.00468 18.8131   3 
   1 -11 -12 47.3638 27.4438   1 
  -1 -11  12 13.3582 53.5915   2 
  -1  11  12 -15.254 22.8797   3 
   1  11 -12 -8.0633 20.0689   3 
  -1 -11 -12 35.7105 24.7074   1 
   1 -11  12 -17.837 53.9772   2 
  -1  11 -12 74.7233 25.1238   3 
   1  11  12 13.2708 24.7855   3 
  12   0 -13 -14.437 34.6996   1 
 -12   0  13 74.0022 30.3289   2 
  10   0 -13 -46.325 28.9895   1 
 -10   0  13 46.8227 24.8007   2 
  -8   0  13 82.4720 22.6916   3 
   8   0 -13 32.9082 29.7148   1 
  -8   0  13 106.597 28.0549   2 
  -6   0  13 438.705 37.1107   2 
   6   0 -13 382.615 46.6020   1 
  -6   0  13 502.243 39.6868   3 
  -4   0  13 1141.39 65.6415   3 
  -4   0  13 1117.43 59.6512   2 
   4   0 -13 1071.21 65.1030   1 
   2   0 -13 14.8816 18.3054   1 
  -2   0  13 23.4282 20.0327   2 
  -2   0  13 35.5210 18.7892   3 
   0   0  13 39.8977 23.3427   2 
   0   0 -13 45.0137 19.4020   1 
   0   0  13 16.8408 19.7904   3 
   2   0  13 -3.2072 21.0552   2 
   2   0  13 6.97304 17.2567   3 
  -2   0 -13 19.6540 16.8300   1 
   4   0  13 267.648 36.3025   3 
  -4   0 -13 249.260 33.8803   1 
  -6   0 -13 147.113 32.4646   2 
  -6   0 -13 185.213 32.1749   1 
   6   0  13 180.661 31.3013   3 
   8   0  13 190.149 34.4967   3 
  -8   0 -13 205.293 35.3613   1 
 -11  -1  13 244.623 43.3718   2 
 -11   1  13 271.296 41.8093   2 
   9  -1 -13 -29.064 27.8192   1 
  -9  -1  13 26.0899 22.9632   2 
  -9  -1  13 12.4561 15.5592   3 
  -9   1  13 -18.905 17.2737   2 
  -9   1  13 -6.9086 11.4384   3 
   9   1 -13 -21.947 27.5334   1 
  -7  -1  13 62.8078 22.5395   2 
  -7  -1  13 51.0399 18.3655   3 
   7  -1 -13 40.0073 28.5668   1 
  -7   1  13 56.9724 20.0580   2 
   7   1 -13 44.4948 29.7997   1 
  -7   1  13 36.8758 19.5117   3 
   5  -1 -13 686.181 52.7963   1 
  -5  -1  13 763.960 49.8704   2 
   5   1 -13 738.114 51.4936   1 
  -5   1  13 693.020 48.5411   3 
  -5   1  13 692.370 42.9701   2 
  -3  -1  13 27.9198 22.7636   2 
   3  -1 -13 24.5599 20.9208   1 
  -3   1  13 45.8923 19.3151   3 
   3   1 -13 40.2548 15.9679   3 
  -3   1  13 44.3772 14.6238   2 
   3   1 -13 27.8358 19.3939   1 
  -1  -1  13 262.239 36.4269   2 
   1  -1 -13 306.360 32.4526   1 
   1   1 -13 299.470 28.9132   3 
   1   1 -13 286.349 30.9610   1 
  -1   1  13 274.351 35.3816   2 
  -1   1  13 276.699 34.8297   3 
  -1  -1 -13 712.217 48.3598   1 
   1  -1  13 638.928 51.5330   2 
  -1   1 -13 753.071 46.8709   3 
   1   1  13 692.724 50.7373   3 
  -1   1 -13 714.678 45.9362   1 
   3  -1  13 187.756 34.1443   2 
  -3  -1 -13 222.666 32.0236   1 
  -3   1 -13 207.198 28.7939   1 
   3   1  13 180.177 30.4281   3 
  -3   1 -13 227.329 29.1087   3 
   5  -1  13 598.146 49.4701   2 
  -5  -1 -13 499.684 44.7269   1 
   5  -1  13 552.558 47.9476   3 
  -5   1 -13 523.408 42.3721   1 
   5   1  13 529.458 46.7402   3 
   7  -1  13 -1.1481 18.5358   3 
  -7  -1 -13 27.8809 21.5901   1 
   7   1  13 -1.5147 18.7743   3 
  -7   1 -13 -9.7906 15.6806   1 
  -7   1 -13 -4.3375 20.6283   2 
  12  -2 -13 -0.5548 35.9469   1 
 -12  -2  13 55.4358 31.7147   2 
  12   2 -13 -71.601 31.5502   1 
 -12   2  13 23.8911 24.5558   2 
 -10  -2  13 75.6658 30.0609   2 
  10  -2 -13 14.1741 32.8458   1 
 -10   2  13 90.8580 25.0755   2 
  10   2 -13 21.4898 33.2896   1 
  -8  -2  13 68.3880 19.9813   3 
   8  -2 -13 -7.9401 27.8908   1 
  -8  -2  13 34.7541 23.8695   2 
  -8   2  13 39.8600 19.6223   2 
  -8   2  13 38.3709 18.3002   3 
   8   2 -13 11.9366 29.6094   1 
  -6  -2  13 57.0389 23.5144   2 
   6  -2 -13 67.4206 28.9315   1 
   6   2 -13 82.4733 27.3583   1 
  -6   2  13 46.3584 17.2085   2 
   6   2 -13 93.2877 19.3057   3 
  -6   2  13 48.5062 20.0784   3 
   4  -2 -13 -0.7750 19.7167   1 
  -4  -2  13 43.0950 22.7831   2 
   4   2 -13 6.64118 19.9780   1 
  -4   2  13 13.4918 18.3361   3 
   4   2 -13 21.8254 14.0386   3 
   2  -2 -13 15.7164 19.6214   1 
  -2  -2  13 -2.2204 26.2787   2 
  -2   2  13 7.93009 17.4181   3 
   2   2 -13 27.9018 17.1845   1 
   2   2 -13 11.9873 14.8055   3 
   0  -2 -13 477.880 40.2653   1 
   0  -2  13 432.127 48.8103   2 
   0   2 -13 493.447 35.5497   1 
   0   2 -13 481.239 36.7912   3 
   0   2  13 457.990 41.3111   3 
  -2  -2 -13 16.9180 18.6317   1 
   2  -2  13 23.9597 26.7682   2 
  -2   2 -13 -0.9436 14.0421   3 
  -2   2 -13 4.00774 13.4094   1 
   2   2  13 22.3096 19.6217   3 
   4  -2  13 121.677 32.8194   2 
  -4  -2 -13 53.7294 24.7006   1 
   4   2  13 99.6769 25.5588   3 
  -4   2 -13 104.622 22.2868   1 
  -4   2 -13 124.593 24.1181   3 
  -6  -2 -13 21.0217 21.3691   1 
   6  -2  13 85.6602 28.4431   2 
  -6   2 -13 5.58277 18.4996   3 
  -6   2 -13 44.2630 18.5922   1 
   6   2  13 25.7313 20.1813   3 
  -8  -2 -13 38.0630 24.3671   1 
   8  -2  13 28.9482 21.5999   1 
   8  -2  13 47.1653 24.8438   3 
  -8   2 -13 -35.008 21.2686   2 
 -11  -3  13 138.448 36.2421   2 
  11  -3 -13 43.6999 35.1457   1 
  11   3 -13 47.8819 37.3486   1 
 -11   3  13 232.874 56.0985   2 
  -9  -3  13 18.7802 24.7232   2 
   9  -3 -13 -12.283 29.2754   1 
  -9   3  13 17.2001 17.3874   3 
   9   3 -13 -60.881 27.1834   1 
   7  -3 -13 27.6325 28.3099   1 
  -7  -3  13 24.0654 23.1711   2 
   7   3 -13 -0.4889 13.5881   3 
  -7   3  13 -18.756 14.3954   3 
   7   3 -13 -7.7367 25.6879   1 
  -5  -3  13 102.169 29.8461   2 
   5  -3 -13 49.5367 26.2599   1 
   5   3 -13 49.8541 17.0938   3 
  -5   3  13 72.4503 21.9404   3 
   5   3 -13 75.8032 23.4773   1 
   3  -3 -13 300.513 36.8953   1 
  -3  -3  13 362.582 43.8422   2 
  -3   3  13 360.380 35.2574   3 
   3   3 -13 388.766 32.3529   1 
   3   3 -13 405.119 32.7174   3 
  -1  -3  13 17.1729 30.3510   2 
   1  -3 -13 47.7520 21.8956   1 
  -1   3  13 20.3338 17.6180   3 
   1   3 -13 -4.7106 12.7582   1 
   1   3 -13 0.70623 13.3508   3 
  -1  -3 -13 257.062 35.0162   1 
   1  -3  13 250.403 43.8682   2 
  -1   3 -13 228.031 24.5697   1 
  -1   3 -13 261.542 28.5200   3 
   1   3  13 230.472 32.1756   3 
   3  -3  13 173.735 38.2663   2 
  -3  -3 -13 159.468 29.5729   1 
  -3   3 -13 118.741 23.7423   3 
   3   3  13 112.680 26.1145   3 
  -3   3 -13 167.303 24.1038   1 
   5  -3  13 533.086 54.5960   2 
  -5  -3 -13 540.847 47.2209   1 
   5   3  13 515.138 45.6091   3 
  -5   3 -13 539.350 43.1917   3 
  -5   3 -13 532.862 40.1532   1 
   7  -3  13 77.9963 29.9741   2 
   7  -3  13 39.6936 20.2256   1 
  -7  -3 -13 -15.122 21.3942   1 
  -7   3 -13 -30.518 15.9789   3 
   7   3  13 -10.958 17.9856   3 
 -12  -4  13 -15.570 26.5990   2 
  12  -4 -13 -53.778 35.9591   1 
  10  -4 -13 -10.436 32.8221   1 
 -10  -4  13 46.6970 30.0121   2 
  10   4 -13 -39.621 30.3012   1 
   8  -4 -13 19.9082 29.1027   1 
  -8  -4  13 12.3570 26.2835   2 
   8   4 -13 24.9329 15.5406   3 
  -8   4  13 37.0183 18.6960   3 
   8   4 -13 16.4954 30.2935   1 
   6  -4 -13 103.072 32.2801   1 
  -6  -4  13 133.842 33.6336   2 
  -6   4  13 162.418 26.4855   3 
   6   4 -13 97.8376 27.9952   1 
   6   4 -13 133.351 22.7000   3 
   4  -4 -13 318.610 39.5168   1 
  -4  -4  13 406.411 45.3924   2 
  -4   4  13 375.398 37.0595   3 
   4   4 -13 399.012 33.1707   3 
   4   4 -13 424.990 33.6184   1 
   2  -4 -13 33.6412 21.8502   1 
  -2  -4  13 -16.337 30.6684   2 
  -2   4  13 17.5648 20.2156   3 
   2   4 -13 28.9773 14.3947   1 
   2   4 -13 16.4009 13.9045   3 
   0  -4 -13 18.7019 19.5139   1 
   0  -4  13 -2.2454 32.9075   2 
   0   4  13 37.2652 19.8176   3 
   0   4 -13 39.8524 14.8311   1 
   0   4 -13 21.2862 16.2586   3 
  -2  -4 -13 24.8142 21.3315   1 
   2  -4  13 24.2165 32.0466   2 
   2   4  13 -1.5734 18.1277   3 
  -2   4 -13 -12.695 15.3754   3 
  -2   4 -13 -6.4639 11.1504   1 
   4  -4  13 27.5671 32.7475   2 
  -4  -4 -13 70.7284 25.2910   1 
  -4   4 -13 38.0510 21.2691   3 
   4   4  13 42.4364 19.4841   3 
   6  -4  13 80.6624 34.8176   2 
  -6  -4 -13 41.7988 22.6098   1 
   6   4  13 42.4471 20.8270   3 
  -6   4 -13 35.6756 21.6528   3 
   8  -4  13 90.7234 34.0065   2 
  -8   4 -13 5.99750 21.4162   3 
 -11  -5  13 73.1703 32.7689   2 
  11  -5 -13 138.461 43.4866   1 
  11   5 -13 15.6802 36.1644   1 
  -9  -5  13 9.57419 24.9460   2 
   9  -5 -13 13.7524 33.2958   1 
   9   5 -13 -63.589 28.2603   1 
  -9   5  13 -6.0153 16.0498   3 
   9   5 -13 12.4031 14.0038   3 
  -7  -5  13 18.2763 27.1757   2 
   7  -5 -13 -8.5227 23.4030   1 
  -7   5  13 14.9095 18.6039   3 
   7   5 -13 4.14339 24.6145   1 
   7   5 -13 5.57975 13.1499   3 
   5  -5 -13 172.309 34.1894   1 
  -5  -5  13 319.973 47.2876   2 
  -5   5  13 307.355 34.0682   3 
   5   5 -13 302.677 31.3962   1 
   5   5 -13 332.093 30.2193   3 
   3  -5 -13 4.65955 21.4058   1 
  -3  -5  13 26.3994 33.7879   2 
  -3   5  13 2.45814 19.6664   3 
   3   5 -13 28.3569 17.2065   3 
  -1  -5  13 58.2984 38.5419   2 
   1  -5 -13 79.4487 24.1461   1 
   1   5 -13 119.842 23.4188   3 
  -1   5  13 143.124 27.6264   3 
   1  -5  13 303.343 53.3205   2 
  -1  -5 -13 279.785 38.8532   1 
   1   5  13 318.655 38.9699   3 
  -1   5 -13 292.970 31.7128   3 
  -3  -5 -13 145.736 30.8340   1 
   3  -5  13 49.9719 37.5968   2 
  -3   5 -13 95.9158 23.6747   3 
   3   5  13 84.9801 25.5600   3 
  -5  -5 -13 302.352 45.6208   1 
   5  -5  13 267.488 52.6999   2 
  -5   5 -13 318.957 34.4695   3 
   5   5  13 260.365 35.1275   3 
   7  -5  13 32.3161 33.5657   2 
  -7  -5 -13 0.17440 23.0534   1 
  -7   5 -13 55.9013 23.9957   3 
   7   5  13 -0.3009 18.8775   3 
 -10  -6  13 33.7455 30.0897   2 
  10  -6 -13 7.17361 34.7177   1 
   8  -6 -13 -6.2916 27.1992   1 
  -8  -6  13 3.55338 25.1413   2 
  -8   6  13 12.3428 19.5940   3 
   8   6 -13 19.3767 15.4466   3 
  -6  -6  13 68.3931 30.7672   2 
   6  -6 -13 3.89155 25.6024   1 
  -6   6  13 56.6695 22.7008   3 
   6   6 -13 16.6517 15.5723   3 
  -4  -6  13 60.7283 37.4935   2 
   4  -6 -13 19.1177 23.7467   1 
  -4   6  13 41.5094 21.6305   3 
   4   6 -13 39.5304 16.9143   3 
  -2  -6  13 69.5274 40.7415   2 
   2  -6 -13 19.7198 21.1287   1 
  -2   6  13 5.88162 18.3775   3 
   2   6 -13 63.8882 19.0885   3 
   0  -6  13 109.523 46.8698   2 
   0  -6 -13 144.287 30.4342   1 
   0   6 -13 165.571 27.2346   3 
   0   6  13 180.572 31.6817   3 
   2  -6  13 13.6725 39.3637   2 
  -2  -6 -13 2.46957 18.4297   1 
   2   6  13 32.6714 20.8256   3 
  -2   6 -13 16.4917 17.6216   3 
   4  -6  13 63.8563 41.9330   2 
  -4  -6 -13 103.742 28.9683   1 
  -4   6 -13 92.8165 23.5878   3 
   4   6  13 104.618 27.0118   3 
  -6  -6 -13 51.5628 25.6428   1 
   6  -6  13 64.1009 40.4534   2 
   6   6  13 35.9403 21.4742   3 
  -6   6 -13 19.1687 20.4259   3 
   9  -7 -13 40.1598 34.3032   1 
  -9  -7  13 -2.1240 27.9090   2 
   9   7 -13 8.37720 15.3579   3 
  -9   7  13 -5.5676 17.8591   3 
  -7  -7  13 79.9963 33.5015   2 
   7  -7 -13 32.2204 30.9310   1 
   7   7 -13 27.7587 16.8981   3 
  -7   7  13 24.6602 23.5798   3 
  -5  -7  13 148.492 42.1569   2 
   5  -7 -13 124.897 32.2046   1 
   5   7 -13 164.947 25.7804   3 
  -5   7  13 185.856 31.7615   3 
  -3  -7  13 -30.829 34.8731   2 
   3  -7 -13 -10.707 20.4414   1 
  -3   7  13 -20.072 20.0257   3 
   3   7 -13 -18.306 13.3898   3 
  -1  -7  13 83.2397 45.1541   2 
   1  -7 -13 89.5545 27.8050   1 
   1   7 -13 102.188 22.4923   3 
  -1   7  13 68.9511 25.5471   3 
   1  -7  13 179.262 54.4176   2 
  -1  -7 -13 180.267 33.7832   1 
   1   7  13 293.634 37.9772   3 
  -1   7 -13 290.410 32.7941   3 
  -3  -7 -13 -1.4046 22.2725   1 
   3  -7  13 -2.3604 41.0639   2 
   3   7  13 29.1394 22.4192   3 
  -3   7 -13 -16.559 18.7205   3 
   5  -7  13 162.247 52.5152   2 
  -5  -7 -13 186.317 36.3254   1 
  -5   7 -13 118.366 27.1577   3 
   5   7  13 157.061 30.8454   3 
   8  -8 -13 19.5573 31.4520   1 
  -8  -8  13 35.0721 34.1938   2 
   8   8 -13 -0.5773 14.7180   3 
  -8   8  13 17.3902 22.4440   3 
   6  -8 -13 26.5388 27.7085   1 
  -6  -8  13 36.7924 33.7929   2 
   6   8 -13 -12.486 12.6216   3 
  -6   8  13 15.7836 22.2820   3 
   4  -8 -13 -1.3705 22.3940   1 
  -4  -8  13 71.6441 42.0127   2 
  -4   8  13 15.9079 22.7852   3 
   4   8 -13 10.7074 16.7496   3 
   2  -8 -13 5.42855 20.5320   1 
  -2  -8  13 5.08413 44.3402   2 
   2   8 -13 4.19668 17.7113   3 
   0  -8 -13 24.3202 23.4133   1 
   0  -8  13 32.5558 47.2391   2 
   0   8 -13 -1.7153 16.6410   3 
   0   8  13 14.5663 22.8497   3 
  -2  -8 -13 20.1632 22.5286   1 
   2  -8  13 -19.111 44.6145   2 
  -2   8 -13 -20.416 16.3592   3 
   2   8  13 -9.4384 21.3463   3 
   4  -8  13 -6.7244 42.4759   2 
  -4  -8 -13 25.9512 24.7638   1 
  -4   8 -13 42.6511 21.4056   3 
   4   8  13 5.27053 22.4133   3 
  -7  -9  13 73.2440 37.9848   2 
   7  -9 -13 27.6461 31.4447   1 
   7   9 -13 -5.3846 15.0143   3 
  -7   9  13 9.24535 23.1990   3 
   5  -9 -13 41.5803 27.6068   1 
  -5  -9  13 32.9730 38.1365   2 
   5   9 -13 66.2252 21.7850   3 
  -5   9  13 16.6833 23.9125   3 
  -3  -9  13 89.8983 48.2276   2 
   3  -9 -13 15.2383 24.0795   1 
  -3   9  13 -8.4489 20.7282   3 
   3   9 -13 15.5473 18.2368   3 
   1  -9 -13 -7.5466 19.9017   1 
  -1  -9  13 -26.218 46.2836   2 
   1   9 -13 24.2660 20.9532   3 
  -1   9  13 2.74499 24.4890   3 
   1  -9  13 19.4382 52.9688   2 
  -1  -9 -13 12.7699 22.8059   1 
   1   9  13 59.1725 28.5459   3 
  -1   9 -13 52.4137 23.8406   3 
  -3  -9 -13 48.9672 24.1108   1 
   3  -9  13 8.67659 52.6949   2 
  -3   9 -13 7.99640 20.9308   3 
   3   9  13 18.4532 22.9821   3 
   6 -10 -13 35.2433 31.4359   1 
  -6 -10  13 52.4583 39.1730   2 
   6  10 -13 8.76653 16.4329   3 
  -6  10  13 8.68949 25.8408   3 
   4 -10 -13 55.1564 29.0261   1 
  -4 -10  13 38.0079 44.8830   2 
  -4  10  13 35.2484 27.9080   3 
   4  10 -13 34.9659 20.4512   3 
  -2 -10  13 13.8378 50.5438   2 
   2 -10 -13 9.55826 25.7464   1 
   2  10 -13 1.25604 18.3396   3 
  -2  10  13 14.3686 27.5329   3 
   0 -10 -13 12.2669 21.4719   1 
   0 -10  13 -83.417 43.9972   2 
   0  10  13 8.59596 25.7520   3 
   0  10 -13 7.95700 21.0006   3 
  -2 -10 -13 9.72586 24.3247   1 
   2 -10  13 44.4319 59.9563   2 
  -2  10 -13 -15.547 19.7034   3 
   2  10  13 48.8344 29.2277   3 
  -3 -11  13 74.0728 53.2547   2 
   3  11 -13 -0.0618 19.1102   3 
  -3  11  13 4.47869 24.6243   3 
  -1 -11  13 35.7445 59.0041   2 
  -1  11  13 -50.274 22.1054   3 
   1  11 -13 11.1007 20.9567   3 
 -12   0  14 80.3637 32.6989   2 
  12   0 -14 -45.305 35.0405   1 
  10   0 -14 57.8801 36.6934   1 
  -8   0  14 29.3966 19.9707   3 
   8   0 -14 -0.2281 29.1336   1 
  -8   0  14 5.35637 18.1007   2 
   6   0 -14 202.857 36.2507   1 
  -6   0  14 222.302 27.4744   2 
  -6   0  14 293.674 35.5491   3 
  -4   0  14 223.890 26.5971   2 
   4   0 -14 220.852 33.4351   1 
  -4   0  14 282.154 36.0398   3 
  -2   0  14 144.739 25.5921   2 
   2   0 -14 110.562 24.3165   1 
  -2   0  14 117.931 25.8420   3 
   0   0 -14 23.8905 18.9380   1 
   0   0  14 60.7057 22.9767   3 
   0   0  14 7.82836 31.9249   2 
  -2   0 -14 31.7278 18.3988   1 
   2   0  14 2.57449 18.4932   3 
   4   0  14 -4.1235 21.2718   3 
  -4   0 -14 9.38808 16.1858   1 
  -6   0 -14 24.5220 20.7143   1 
   6   0  14 -5.7725 21.5087   3 
 -11  -1  14 148.646 35.0642   2 
  11  -1 -14 64.7896 39.0285   1 
 -11   1  14 135.391 33.1355   2 
  11   1 -14 48.7832 38.5517   1 
  -9  -1  14 1.02595 18.0661   3 
  -9  -1  14 51.4021 26.0555   2 
   9  -1 -14 30.1922 33.2906   1 
  -9   1  14 0.84467 16.2265   3 
   9   1 -14 -16.557 28.5026   1 
  -9   1  14 34.6268 21.2625   2 
   7  -1 -14 199.222 39.7367   1 
  -7  -1  14 271.646 34.7355   3 
  -7  -1  14 265.183 33.0233   2 
  -7   1  14 275.250 29.3771   2 
   7   1 -14 173.569 36.3601   1 
  -7   1  14 234.786 33.9901   3 
  -5  -1  14 219.886 32.4836   3 
   5  -1 -14 240.626 37.2082   1 
  -5  -1  14 270.316 30.7345   2 
   5   1 -14 222.031 35.0082   1 
  -5   1  14 175.873 30.5579   3 
  -3  -1  14 55.1118 22.1803   2 
   3  -1 -14 66.6769 23.9706   1 
   3   1 -14 58.6132 21.4456   1 
   3   1 -14 22.5723 16.2334   3 
  -3   1  14 63.3535 21.9060   3 
   1  -1 -14 672.773 48.8065   1 
  -1  -1  14 587.460 48.9410   2 
  -1   1  14 752.667 53.1327   3 
   1   1 -14 692.664 46.7715   1 
   1   1 -14 709.197 45.4254   3 
   1  -1  14 -9.3299 26.5697   2 
  -1  -1 -14 5.05581 17.6706   1 
  -1   1 -14 23.9191 16.7353   1 
  -1   1 -14 15.7943 16.7881   3 
   1   1  14 -0.3439 16.9262   3 
   3  -1  14 11.0938 26.8468   2 
  -3  -1 -14 65.6090 22.6576   1 
   3   1  14 81.6811 23.4324   3 
  -3   1 -14 62.4876 20.1183   1 
  -3   1 -14 20.5926 18.3117   3 
   5  -1  14 268.554 41.6247   2 
   5  -1  14 241.549 37.3563   3 
  -5  -1 -14 258.904 37.5635   1 
  -5   1 -14 244.727 34.3890   1 
   5   1  14 298.059 39.9420   3 
   7  -1  14 28.2810 24.5841   3 
   7  -1  14 122.526 41.1054   2 
  -7  -1 -14 -3.4652 20.9849   1 
   7   1  14 30.5519 20.8896   3 
  -7   1 -14 21.9863 21.9191   1 
 -12  -2  14 10.6405 27.1615   2 
  12  -2 -14 -61.355 32.5922   1 
  12   2 -14 -63.313 33.3417   1 
  10  -2 -14 7.63941 35.4231   1 
 -10  -2  14 31.9124 26.0855   2 
  10   2 -14 -17.247 32.1196   1 
  -8  -2  14 13.1337 23.0985   2 
   8  -2 -14 9.89266 28.5462   1 
  -8  -2  14 -15.103 14.2360   3 
   8   2 -14 -10.729 29.3261   1 
  -8   2  14 2.14956 16.0292   3 
  -6  -2  14 137.628 29.5596   2 
   6  -2 -14 78.7564 30.0356   1 
   6   2 -14 108.625 20.8351   3 
  -6   2  14 111.915 25.7128   3 
   6   2 -14 122.186 30.6526   1 
  -4  -2  14 54.0964 23.6645   2 
   4  -2 -14 51.7813 22.7544   1 
   4   2 -14 35.6754 20.2612   1 
  -4   2  14 37.1805 21.6621   3 
   4   2 -14 38.3456 16.9123   3 
   2  -2 -14 53.1376 22.6630   1 
  -2  -2  14 20.7007 25.8208   2 
   2   2 -14 6.17863 14.6630   3 
   2   2 -14 47.3373 18.0899   1 
  -2   2  14 63.5056 23.6481   3 
   0  -2  14 256.836 41.4171   2 
   0  -2 -14 272.030 35.7656   1 
   0   2  14 253.363 34.9016   3 
   0   2 -14 257.308 28.9969   3 
   0   2 -14 282.735 28.5015   1 
  -2  -2 -14 301.017 35.0426   1 
   2  -2  14 253.403 42.7273   2 
  -2   2 -14 285.126 31.2040   3 
  -2   2 -14 298.658 29.6094   1 
   2   2  14 340.534 37.9309   3 
   4  -2  14 130.841 36.1136   2 
  -4  -2 -14 149.605 32.3982   1 
  -4   2 -14 208.165 30.0442   1 
  -4   2 -14 148.618 27.2614   3 
   4   2  14 165.742 30.4838   3 
  -6  -2 -14 197.837 36.3635   1 
   6  -2  14 194.700 38.2265   2 
   6   2  14 140.324 30.4317   3 
  -6   2 -14 148.677 29.0203   1 
 -11  -3  14 126.450 36.5526   2 
  11  -3 -14 -0.0089 37.2844   1 
  11   3 -14 -24.191 34.6929   1 
   9  -3 -14 41.1200 33.5189   1 
  -9  -3  14 67.5006 28.4239   2 
  -9   3  14 55.2256 20.1208   3 
   9   3 -14 59.4076 34.4897   1 
   7  -3 -14 10.8956 27.3083   1 
  -7  -3  14 51.2199 26.7526   2 
   7   3 -14 17.0674 27.5098   1 
  -7   3  14 35.6543 19.1812   3 
   7   3 -14 32.5191 16.3318   3 
   5  -3 -14 13.6363 23.7970   1 
  -5  -3  14 71.1920 26.5765   2 
   5   3 -14 50.6760 23.4975   1 
  -5   3  14 26.7813 20.7022   3 
   5   3 -14 15.9454 15.7700   3 
  -3  -3  14 76.3443 30.3446   2 
   3  -3 -14 19.5600 20.9752   1 
   3   3 -14 75.2619 19.9075   1 
  -3   3  14 62.6164 23.6679   3 
   3   3 -14 51.1774 17.7756   3 
  -1  -3  14 513.674 53.9231   2 
   1  -3 -14 546.006 46.0714   1 
   1   3 -14 641.154 42.9647   3 
   1   3 -14 575.250 38.4572   1 
  -1   3  14 471.361 43.3801   3 
   1  -3  14 -18.495 29.4860   2 
  -1  -3 -14 37.0335 20.4065   1 
  -1   3 -14 -2.6591 12.3105   1 
   1   3  14 25.7511 21.3397   3 
  -1   3 -14 21.3839 17.3021   3 
   3  -3  14 2.34889 30.3963   2 
  -3  -3 -14 -17.409 14.7954   1 
  -3   3 -14 27.7549 15.8737   1 
   3   3  14 -9.6164 18.0814   3 
  -3   3 -14 -16.193 17.2462   3 
   5  -3  14 242.695 45.9043   2 
  -5  -3 -14 244.755 39.6055   1 
   5   3  14 218.867 33.3111   3 
  -5   3 -14 231.589 33.4993   3 
  -5   3 -14 240.574 30.8238   1 
   7  -3  14 25.5458 26.4830   1 
   7  -3  14 81.4958 33.6068   2 
  -7  -3 -14 4.73511 22.6080   1 
  -7   3 -14 -12.782 17.4845   3 
   7   3  14 5.94355 19.1611   3 
  10  -4 -14 67.1309 37.6074   1 
 -10  -4  14 141.206 37.1238   2 
  10   4 -14 -57.559 30.7494   1 
  -8  -4  14 -11.606 24.2331   2 
   8  -4 -14 16.4855 28.8191   1 
   8   4 -14 -37.080 25.8028   1 
   8   4 -14 8.38415 14.7577   3 
  -8   4  14 -5.5233 15.9140   3 
   6  -4 -14 61.1093 30.3395   1 
  -6  -4  14 192.979 37.9037   2 
  -6   4  14 189.129 30.5217   3 
   6   4 -14 157.635 24.5919   3 
   6   4 -14 144.816 29.4359   1 
  -4  -4  14 156.330 36.7411   2 
   4  -4 -14 141.947 29.9817   1 
   4   4 -14 127.062 23.7043   3 
  -4   4  14 160.988 28.9117   3 
   4   4 -14 146.905 24.0133   1 
   2  -4 -14 168.043 32.0795   1 
  -2  -4  14 219.623 43.1530   2 
   2   4 -14 280.324 25.8656   1 
   2   4 -14 247.584 28.5983   3 
  -2   4  14 202.018 32.6928   3 
   0  -4 -14 20.0908 19.8285   1 
   0  -4  14 16.7848 33.6543   2 
   0   4  14 5.50122 18.6162   3 
   0   4 -14 11.9796 16.4241   3 
   2  -4  14 -21.585 32.4084   2 
  -2  -4 -14 -3.7413 18.9736   1 
  -2   4 -14 13.4104 17.7104   3 
   2   4  14 -11.537 16.8888   3 
  -4  -4 -14 -8.5528 19.3991   1 
   4  -4  14 -18.900 30.9371   2 
  -4   4 -14 -1.5212 17.6418   3 
   4   4  14 31.5949 19.2821   3 
  -6  -4 -14 -1.7914 19.6062   1 
   6  -4  14 -33.746 27.4139   2 
   6   4  14 -23.387 18.8076   3 
  -6   4 -14 -6.0648 18.6659   3 
 -11  -5  14 106.452 39.5966   2 
   9  -5 -14 13.6943 33.7718   1 
  -9  -5  14 14.3045 26.2028   2 
   9   5 -14 -24.843 29.0467   1 
  -9   5  14 34.5226 18.9234   3 
   9   5 -14 -7.8296 14.9187   3 
   7  -5 -14 60.0605 28.9478   1 
  -7  -5  14 155.176 37.3655   2 
  -7   5  14 119.423 25.5027   3 
   7   5 -14 49.3138 37.3440   1 
   7   5 -14 69.7124 19.3142   3 
  -5  -5  14 118.108 36.4498   2 
   5  -5 -14 65.4466 27.3094   1 
   5   5 -14 95.9078 22.1486   3 
  -5   5  14 160.082 31.0159   3 
   3  -5 -14 44.8214 23.9865   1 
  -3  -5  14 41.7810 33.3077   2 
   3   5 -14 30.0895 17.4627   3 
  -3   5  14 29.3243 23.2845   3 
  -1  -5  14 164.774 44.0659   2 
   1  -5 -14 205.664 34.2671   1 
   1   5 -14 234.980 30.6754   3 
  -1   5  14 178.173 31.3219   3 
  -1  -5 -14 33.0753 21.5788   1 
   1  -5  14 1.42076 37.5464   2 
  -1   5 -14 18.6360 18.5012   3 
   1   5  14 40.2617 22.2476   3 
   3  -5  14 55.4436 38.9790   2 
  -3  -5 -14 15.6247 18.4571   1 
  -3   5 -14 61.5229 20.8089   3 
   3   5  14 58.0033 23.2159   3 
   5  -5  14 59.2212 38.3619   2 
  -5  -5 -14 87.3351 31.0301   1 
   5   5  14 107.728 28.5452   3 
  -5   5 -14 83.8244 25.4149   3 
  10  -6 -14 76.5161 39.3301   1 
 -10  -6  14 53.2203 33.3268   2 
   8  -6 -14 10.4697 28.1394   1 
  -8  -6  14 25.1755 28.3715   2 
  -8   6  14 -5.9022 17.8973   3 
   8   6 -14 -16.081 14.8219   3 
   6  -6 -14 53.7059 28.3735   1 
  -6  -6  14 63.0377 32.8623   2 
  -6   6  14 85.3779 26.6033   3 
   6   6 -14 64.3896 19.5335   3 
  -4  -6  14 7.52473 33.0649   2 
   4  -6 -14 22.4941 22.0408   1 
   4   6 -14 -2.6785 15.6199   3 
  -4   6  14 21.7555 20.5374   3 
  -2  -6  14 48.5904 41.3428   2 
   2  -6 -14 5.17116 21.7648   1 
   2   6 -14 13.2381 17.2364   3 
  -2   6  14 -28.519 17.9656   3 
   0  -6  14 21.0359 40.6552   2 
   0  -6 -14 55.3523 23.2704   1 
   0   6 -14 49.2539 20.7265   3 
   0   6  14 32.6706 24.1504   3 
  -2  -6 -14 71.2154 27.5608   1 
   2  -6  14 39.3894 44.0668   2 
  -2   6 -14 27.3696 20.9319   3 
   2   6  14 86.9957 27.2448   3 
   4  -6  14 71.4781 45.4972   2 
  -4  -6 -14 126.029 31.8085   1 
   4   6  14 98.3117 27.4899   3 
  -4   6 -14 108.577 26.1947   3 
   6  -6  14 84.9818 44.2642   2 
  -6   6 -14 47.7492 23.4205   3 
   6   6  14 51.8236 25.4311   3 
  -9  -7  14 52.5671 33.0473   2 
   9  -7 -14 67.7571 38.3776   1 
   9   7 -14 -0.7808 15.2843   3 
  -9   7  14 40.0340 23.2392   3 
   7  -7 -14 45.5481 30.0061   1 
  -7  -7  14 78.0181 35.3562   2 
  -7   7  14 64.8239 24.7291   3 
   7   7 -14 88.4601 21.8290   3 
   5  -7 -14 38.2481 25.6855   1 
  -5  -7  14 38.0753 33.7931   2 
   5   7 -14 53.5358 19.4184   3 
  -5   7  14 47.3084 23.9364   3 
  -3  -7  14 -31.836 36.3586   2 
   3  -7 -14 14.2401 22.4394   1 
   3   7 -14 -16.919 15.8164   3 
  -3   7  14 -21.996 19.9959   3 
   1  -7 -14 193.048 36.0547   1 
  -1  -7  14 224.384 53.2224   2 
  -1   7  14 233.217 36.7498   3 
   1   7 -14 359.952 35.0147   3 
  -1  -7 -14 15.4499 21.3756   1 
   1  -7  14 -35.701 43.4067   2 
   1   7  14 16.3881 22.3805   3 
  -1   7 -14 21.0955 19.5781   3 
  -3  -7 -14 11.4360 19.4822   1 
   3  -7  14 -12.542 43.3670   2 
   3   7  14 -13.432 22.2348   3 
  -3   7 -14 0.05667 19.7867   3 
  -5  -7 -14 105.075 34.9147   1 
   5  -7  14 35.8168 45.9227   2 
  -5   7 -14 47.7344 24.9015   3 
   5   7  14 109.140 30.2994   3 
  -8  -8  14 48.3828 34.3542   2 
   8  -8 -14 35.9488 34.3178   1 
  -8   8  14 -10.526 22.9985   3 
   8   8 -14 19.0018 18.1389   3 
   6  -8 -14 21.6491 27.8952   1 
  -6  -8  14 56.8188 35.8400   2 
  -6   8  14 27.5081 23.8829   3 
   6   8 -14 40.9725 18.3820   3 
   4  -8 -14 29.0642 25.6690   1 
  -4  -8  14 22.1998 39.9418   2 
  -4   8  14 24.4353 23.9542   3 
   4   8 -14 -17.184 15.3570   3 
   2  -8 -14 12.9792 21.7201   1 
  -2  -8  14 -12.520 41.8245   2 
   2   8 -14 -3.4516 17.8582   3 
  -2   8  14 -36.960 20.3026   3 
   0  -8 -14 17.3717 22.7462   1 
   0  -8  14 -55.793 41.4223   2 
   0   8  14 1.82533 22.9232   3 
   0   8 -14 5.85241 18.6035   3 
   2  -8  14 -4.3176 48.0671   2 
  -2  -8 -14 21.0656 21.6737   1 
  -2   8 -14 34.8548 21.6167   3 
   2   8  14 -5.0365 21.2551   3 
   4  -8  14 -42.903 45.1605   2 
   4   8  14 -12.063 21.6289   3 
  -4   8 -14 -31.416 19.0884   3 
  -7  -9  14 23.7724 33.4053   2 
   7   9 -14 19.5719 17.5221   3 
  -7   9  14 -7.8999 25.3477   3 
   5  -9 -14 34.3748 28.3407   1 
  -5  -9  14 21.5642 37.6618   2 
   5   9 -14 37.4650 19.9733   3 
  -5   9  14 61.8104 26.6369   3 
   3  -9 -14 34.0967 27.3676   1 
  -3  -9  14 -2.3044 42.7008   2 
   3   9 -14 -7.6095 17.0614   3 
  -3   9  14 7.62903 22.0831   3 
   1  -9 -14 94.2731 29.8972   1 
  -1  -9  14 -8.1028 46.7037   2 
   1   9 -14 53.5789 23.4459   3 
  -1   9  14 38.0384 27.4962   3 
  -1  -9 -14 14.4183 25.4050   1 
   1  -9  14 22.3203 52.9436   2 
  -1   9 -14 21.2184 22.7020   3 
   1   9  14 -8.4040 24.3215   3 
   3   9  14 35.5964 25.7740   3 
  -4 -10  14 1.39523 44.7048   2 
   4  10 -14 -2.3764 18.6746   3 
  -4  10  14 13.2484 28.7165   3 
  -2 -10  14 20.0159 52.1373   2 
   2 -10 -14 39.7409 28.6398   1 
  -2  10  14 -0.5748 28.3719   3 
   2  10 -14 8.45860 19.2440   3 
   0 -10  14 -8.0051 53.9547   2 
   0  10 -14 -29.594 17.5939   3 
   0  10  14 3.23895 27.7430   3 
  10   0 -15 87.8025 39.8051   1 
 -10   0  15 135.073 33.4290   2 
  -8   0  15 49.4828 22.5325   3 
   8   0 -15 16.2834 30.6287   1 
  -8   0  15 28.3255 24.2272   2 
   6   0 -15 23.5615 25.3121   1 
  -6   0  15 1.15824 18.4198   3 
   4   0 -15 26.0532 21.5416   1 
  -4   0  15 -22.768 20.1416   3 
  -2   0  15 -0.4058 19.4246   3 
   2   0 -15 14.5171 18.2336   1 
   0   0 -15 297.533 34.0880   1 
   0   0  15 328.825 41.2112   3 
   2   0  15 -8.0031 22.3066   3 
  -2   0 -15 -24.809 15.7742   1 
   4   0  15 88.8965 28.5477   3 
  -4   0 -15 143.294 30.2921   1 
  -6   0 -15 99.6778 28.5366   1 
   6   0  15 95.9482 28.9668   3 
 -11  -1  15 76.6213 30.4532   2 
  11  -1 -15 22.9900 39.5798   1 
  11   1 -15 13.6490 38.6029   1 
   9  -1 -15 17.6881 32.5364   1 
  -9  -1  15 -30.139 14.5686   3 
  -9  -1  15 3.78531 21.2602   2 
  -9   1  15 -10.009 16.0981   3 
   9   1 -15 48.5761 34.9346   1 
  -7  -1  15 250.668 35.8432   2 
   7  -1 -15 140.915 35.5309   1 
  -7  -1  15 220.794 33.0247   3 
  -7   1  15 184.725 31.4478   3 
   7   1 -15 180.332 36.9390   1 
  -5  -1  15 32.3183 21.7531   3 
   5  -1 -15 2.53376 22.8038   1 
  -5  -1  15 34.1577 18.9680   2 
  -5   1  15 25.8421 20.8241   3 
   5   1 -15 57.6865 25.5578   1 
   3  -1 -15 43.1863 22.3262   1 
  -3  -1  15 72.7081 22.3204   2 
   3   1 -15 73.2734 22.5125   1 
  -3   1  15 54.0224 22.5612   3 
  -1  -1  15 278.879 49.4430   2 
   1  -1 -15 309.354 33.9371   1 
   1   1 -15 289.727 30.7156   3 
   1   1 -15 271.603 34.1925   1 
  -1   1  15 305.506 38.4569   3 
  -1  -1 -15 10.9303 18.5694   1 
   1   1  15 41.7911 22.5784   3 
  -1   1 -15 36.3080 18.4079   3 
  -1   1 -15 28.3518 19.4045   1 
  -3  -1 -15 34.0999 21.9085   1 
   3  -1  15 52.8629 24.3341   3 
   3   1  15 32.2019 23.2077   3 
  -3   1 -15 54.8762 23.0309   1 
  -5  -1 -15 270.408 40.6952   1 
   5  -1  15 301.910 43.1282   3 
  -5   1 -15 295.899 34.9831   1 
   5   1  15 256.888 38.6267   3 
   7  -1  15 119.477 30.9574   3 
   7   1  15 64.0805 25.8348   3 
  10  -2 -15 29.1033 34.7071   1 
 -10  -2  15 20.9616 24.2770   2 
  10   2 -15 32.0835 38.0701   1 
   8  -2 -15 44.9727 31.6328   1 
  -8  -2  15 -4.4691 18.1159   3 
  -8  -2  15 18.0862 22.9876   2 
   8   2 -15 28.8766 30.0495   1 
  -8   2  15 -2.2688 16.5481   3 
   6  -2 -15 139.869 34.9869   1 
  -6  -2  15 286.745 39.3783   2 
  -6   2  15 231.647 34.6711   3 
   6   2 -15 304.610 30.5575   3 
   6   2 -15 243.892 37.5026   1 
   4  -2 -15 124.247 29.3993   1 
  -4  -2  15 259.411 35.3866   2 
  -4   2  15 160.902 30.2280   3 
   4   2 -15 258.354 30.9417   1 
   4   2 -15 194.145 27.1498   3 
   2  -2 -15 30.1241 22.3534   1 
  -2  -2  15 31.2448 26.9765   2 
  -2   2  15 14.7777 21.6990   3 
   2   2 -15 12.3924 16.8889   1 
   2   2 -15 15.2423 16.2024   3 
   0  -2  15 277.307 42.9250   2 
   0  -2 -15 354.757 36.4744   1 
   0   2  15 294.668 39.1684   3 
   0   2 -15 337.462 31.9356   1 
   0   2 -15 280.774 32.1245   3 
   2  -2  15 -11.428 30.2491   2 
  -2  -2 -15 10.2200 17.9558   1 
  -2   2 -15 -14.957 15.2008   3 
  -2   2 -15 19.1587 16.3195   1 
   2   2  15 17.3155 21.0165   3 
  -4  -2 -15 15.2150 23.4523   1 
   4  -2  15 -3.8491 30.1977   2 
   4   2  15 58.9578 24.2326   3 
  -4   2 -15 40.6868 21.7575   3 
  -4   2 -15 26.6113 18.1761   1 
  -6  -2 -15 76.3206 29.2331   1 
   6  -2  15 49.9789 26.9802   3 
  -6   2 -15 128.941 27.2888   1 
   6   2  15 55.8780 25.7474   3 
  11  -3 -15 -16.751 35.2183   1 
 -11  -3  15 15.4269 25.9156   2 
  11   3 -15 -52.017 33.3223   1 
  -9  -3  15 12.9181 22.9914   2 
  -9  -3  15 3.55370 17.5260   3 
   9  -3 -15 38.8198 37.3184   1 
   9   3 -15 -11.063 32.3077   1 
  -9   3  15 1.59462 20.2236   3 
  -7  -3  15 226.044 38.4947   2 
   7  -3 -15 147.233 36.6828   1 
   7   3 -15 206.523 37.7776   1 
   7   3 -15 274.734 29.1713   3 
  -7   3  15 200.596 32.5987   3 
   5  -3 -15 -7.5014 22.6640   1 
  -5  -3  15 12.3024 23.3960   2 
   5   3 -15 -16.545 14.5763   3 
  -5   3  15 -10.704 19.2302   3 
   5   3 -15 20.7426 20.3275   1 
   3  -3 -15 -4.7390 18.1077   1 
  -3  -3  15 7.20016 25.8557   2 
   3   3 -15 7.66090 16.6434   1 
   3   3 -15 -13.423 14.7203   3 
  -3   3  15 -32.724 17.6195   3 
  -1  -3  15 114.324 36.2625   2 
   1  -3 -15 149.660 30.5954   1 
  -1   3  15 125.091 27.6762   3 
   1   3 -15 161.064 24.5441   1 
   1   3 -15 126.725 24.4390   3 
   1  -3  15 -12.793 32.3181   2 
  -1  -3 -15 28.3294 21.8334   1 
  -1   3 -15 -24.184 15.8177   3 
   1   3  15 18.9646 22.1875   3 
  -1   3 -15 -12.191 12.0171   1 
  -3  -3 -15 6.27438 17.5854   1 
   3  -3  15 -36.197 29.1299   2 
  -3   3 -15 5.35068 17.8859   1 
  -3   3 -15 -6.6960 18.3748   3 
   3   3  15 -17.741 19.9467   3 
  -5  -3 -15 295.244 42.6541   1 
   5  -3  15 292.827 51.5659   2 
  -5   3 -15 283.852 37.8896   3 
   5   3  15 291.482 41.2997   3 
  10  -4 -15 14.6380 33.4797   1 
 -10  -4  15 63.6172 32.6759   2 
  10   4 -15 -54.097 32.4056   1 
  -8  -4  15 38.2174 28.7902   2 
   8  -4 -15 48.1308 31.2573   1 
   8   4 -15 17.8021 30.6551   1 
   8   4 -15 27.1845 17.3848   3 
  -8   4  15 -34.067 17.1996   3 
  -6  -4  15 128.948 34.2454   2 
   6  -4 -15 111.658 32.3578   1 
   6   4 -15 112.862 27.4583   1 
   6   4 -15 88.5801 21.6975   3 
  -6   4  15 147.304 29.0559   3 
   4  -4 -15 78.8558 26.4276   1 
  -4  -4  15 116.124 34.5108   2 
   4   4 -15 118.312 23.9673   3 
  -4   4  15 135.339 29.1853   3 
   4   4 -15 148.591 25.2925   1 
   2  -4 -15 -4.5003 20.3673   1 
  -2  -4  15 46.4043 34.1307   2 
  -2   4  15 -11.755 17.0895   3 
   2   4 -15 12.4353 17.9784   3 
   0  -4  15 205.350 45.8893   2 
   0  -4 -15 241.115 36.2764   1 
   0   4  15 239.065 36.6704   3 
   0   4 -15 253.469 31.9112   3 
   2  -4  15 -15.973 34.1233   2 
  -2  -4 -15 28.4242 22.1234   1 
  -2   4 -15 -14.412 16.3117   3 
   2   4  15 -7.3229 20.4226   3 
   4  -4  15 -2.3810 33.4425   2 
  -4  -4 -15 35.1082 26.3790   1 
  -4   4 -15 6.23900 19.5391   3 
   4   4  15 39.4038 25.0980   3 
   6  -4  15 53.2932 39.5898   2 
   6   4  15 38.1955 23.3309   3 
  -6   4 -15 44.7551 23.1034   3 
  -9  -5  15 42.8081 30.4404   2 
   9  -5 -15 -3.4156 31.8845   1 
   9   5 -15 -12.760 16.0402   3 
  -9   5  15 7.59457 18.7111   3 
   7  -5 -15 56.0024 29.7619   1 
  -7  -5  15 118.539 35.2604   2 
  -7   5  15 68.9961 26.0413   3 
   7   5 -15 54.7871 19.3929   3 
  -5  -5  15 29.3175 28.6256   2 
   5  -5 -15 -20.544 21.1810   1 
   5   5 -15 3.73719 14.5793   3 
  -5   5  15 24.9035 23.1771   3 
  -3  -5  15 32.8712 33.5242   2 
   3  -5 -15 33.7854 23.4123   1 
  -3   5  15 38.7919 24.1535   3 
   3   5 -15 47.7723 19.3654   3 
   1  -5 -15 84.6145 27.1872   1 
  -1  -5  15 122.165 42.7183   2 
  -1   5  15 107.051 28.6319   3 
   1   5 -15 110.492 25.1680   3 
  -1  -5 -15 -15.707 18.5976   1 
   1  -5  15 -54.607 36.1991   2 
   1   5  15 -2.1147 19.9638   3 
  -1   5 -15 2.34673 17.6530   3 
  -3  -5 -15 39.3611 23.0837   1 
   3  -5  15 16.7936 39.6402   2 
   3   5  15 43.5149 24.0358   3 
  -3   5 -15 56.3120 22.3450   3 
  -5  -5 -15 94.3907 32.5703   1 
   5  -5  15 154.577 50.0617   2 
   5   5  15 131.153 30.9049   3 
  -5   5 -15 91.4054 26.0747   3 
   8  -6 -15 26.4214 30.3237   1 
  -8  -6  15 63.3655 34.5170   2 
  -8   6  15 -31.712 19.8933   3 
   8   6 -15 24.1194 17.9805   3 
   6  -6 -15 -8.1797 24.7712   1 
  -6  -6  15 24.9635 28.9379   2 
  -6   6  15 2.05014 20.3447   3 
   6   6 -15 28.3651 17.8390   3 
  -4  -6  15 -5.5046 31.3304   2 
   4  -6 -15 -19.937 19.9470   1 
  -4   6  15 56.5058 25.8584   3 
   4   6 -15 -12.518 15.6410   3 
   2  -6 -15 10.3903 23.6597   1 
  -2  -6  15 37.2777 39.2811   2 
   2   6 -15 -3.2804 17.1852   3 
  -2   6  15 -21.833 19.1767   3 
   0  -6  15 69.7155 45.0122   2 
   0  -6 -15 102.975 27.8831   1 
   0   6  15 148.479 31.6172   3 
   0   6 -15 125.308 26.9100   3 
  -2  -6 -15 21.8087 23.5497   1 
   2  -6  15 2.10271 42.2728   2 
  -2   6 -15 17.1947 21.1309   3 
   2   6  15 18.6699 23.2514   3 
   4  -6  15 18.9109 42.9420   2 
  -4  -6 -15 24.0572 25.5329   1 
  -4   6 -15 77.4495 23.3508   3 
   4   6  15 45.9001 25.5608   3 
  -7  -7  15 137.131 39.5828   2 
   7  -7 -15 86.4770 34.2261   1 
  -7   7  15 133.034 30.3241   3 
   7   7 -15 133.564 26.1340   3 
  -5  -7  15 49.5957 35.3121   2 
   5  -7 -15 5.87157 25.5069   1 
  -5   7  15 61.7553 25.8019   3 
   5   7 -15 9.57350 18.5190   3 
   3  -7 -15 10.5569 25.0068   1 
  -3  -7  15 -22.002 36.3495   2 
   3   7 -15 11.1271 17.9829   3 
  -3   7  15 24.8625 23.8338   3 
   1  -7 -15 43.9244 25.4594   1 
  -1  -7  15 71.3543 46.6947   2 
   1   7 -15 67.0556 22.7707   3 
  -1   7  15 74.5859 28.7295   3 
  -1  -7 -15 46.1544 27.2404   1 
   1  -7  15 -33.776 44.7780   2 
   1   7  15 -31.338 22.8266   3 
  -1   7 -15 -19.170 17.5312   3 
   3  -7  15 -2.4993 46.6135   2 
  -3  -7 -15 49.1626 24.5187   1 
  -3   7 -15 3.71625 19.9227   3 
   3   7  15 -8.6907 20.7924   3 
  -6  -8  15 101.925 41.3226   2 
   6  -8 -15 51.0645 30.7712   1 
  -6   8  15 21.8393 24.9065   3 
   6   8 -15 14.3806 17.1025   3 
   4  -8 -15 10.3621 26.5785   1 
  -4  -8  15 37.1668 40.3256   2 
  -4   8  15 47.4689 29.2558   3 
   4   8 -15 -17.573 16.4606   3 
   2  -8 -15 -11.110 22.7066   1 
  -2  -8  15 -49.804 40.1895   2 
  -2   8  15 -49.280 23.5233   3 
   2   8 -15 -15.668 19.0975   3 
   0  -8  15 -27.279 44.3583   2 
   0  -8 -15 31.8974 24.5349   1 
   0   8 -15 2.62935 20.8226   3 
   0   8  15 55.8462 27.9203   3 
  -2  -8 -15 13.0962 23.3277   1 
   2  -8  15 -13.742 50.1412   2 
  -2   8 -15 -7.5778 21.6947   3 
   2   8  15 10.0488 25.9283   3 
  -5  -9  15 78.6329 42.4573   2 
  -5   9  15 -24.261 20.5670   3 
   5   9 -15 -5.6832 17.6210   3 
   3  -9 -15 11.9873 26.6107   1 
  -3  -9  15 61.3175 48.3596   2 
  -3   9  15 -17.648 23.0487   3 
   3   9 -15 46.1167 21.4940   3 
   1  -9 -15 76.6686 29.2348   1 
  -1  -9  15 15.4372 50.1101   2 
  -1   9  15 16.6772 27.3003   3 
   1   9 -15 51.4229 23.1493   3 
   1  -9  15 -34.581 50.8795   2 
   1   9  15 -40.100 22.0373   3 
  -1   9 -15 -33.859 18.8186   3 
  10   0 -16 -6.9271 33.3718   1 
  -8   0  16 56.7616 25.3157   3 
   8   0 -16 29.9070 30.2003   1 
  -6   0  16 532.946 47.5700   3 
   6   0 -16 411.914 45.9918   1 
  -4   0  16 8.21235 22.3437   3 
   4   0 -16 35.3264 24.2168   1 
   2   0 -16 285.243 36.6482   1 
  -2   0  16 314.333 42.9511   3 
   0   0 -16 90.2683 24.3933   1 
   2   0  16 -15.935 20.4150   3 
  -2   0 -16 -2.8672 17.9272   1 
   4   0  16 123.879 31.4754   3 
  -4   0 -16 102.606 28.3205   1 
   6   0  16 61.1313 29.0132   3 
  -9  -1  16 15.3927 20.4429   3 
   9  -1 -16 7.50632 30.1413   1 
   9   1 -16 -4.3979 34.7661   1 
  -9   1  16 -12.443 18.1060   3 
   7  -1 -16 105.217 34.4523   1 
  -7  -1  16 142.391 30.5806   3 
   7   1 -16 129.652 33.8548   1 
  -7   1  16 129.984 30.1147   3 
  -5  -1  16 -12.407 20.1470   3 
   5  -1 -16 57.0064 27.7678   1 
  -5   1  16 -11.479 18.9778   3 
   5   1 -16 61.1398 27.1813   1 
  -3  -1  16 220.940 36.5260   3 
   3  -1 -16 186.691 32.7605   1 
  -3   1  16 158.242 31.8511   3 
   3   1 -16 169.071 29.6357   1 
   1  -1 -16 368.137 38.2337   1 
  -1  -1  16 372.483 46.2489   3 
  -1   1  16 399.526 42.3010   3 
   1   1 -16 359.762 36.2034   1 
  -1  -1 -16 51.1367 23.3781   1 
   1  -1  16 50.6664 24.5292   3 
   1   1  16 46.3676 27.0475   3 
  -1   1 -16 55.5607 21.1264   1 
  -3  -1 -16 447.786 42.7966   1 
   3  -1  16 493.728 51.7673   3 
  -3   1 -16 504.859 43.2705   1 
   3   1  16 480.820 49.5940   3 
  -5  -1 -16 12.9417 20.0967   1 
   5  -1  16 16.6912 22.9937   3 
   5   1  16 0.05030 22.5657   3 
  -5   1 -16 -7.0218 18.7044   1 
 -10  -2  16 18.1491 24.1986   2 
  10  -2 -16 1.35160 37.3258   1 
  10   2 -16 -45.169 32.2139   1 
  -8  -2  16 55.9573 24.5385   3 
  -8  -2  16 70.0213 27.6545   2 
   8  -2 -16 76.5527 32.3805   1 
   8   2 -16 5.76353 29.8417   1 
   6  -2 -16 142.232 35.1056   1 
  -6  -2  16 196.672 33.7829   2 
  -6   2  16 166.792 31.1442   3 
   6   2 -16 172.071 34.1060   1 
  -4  -2  16 146.931 31.5029   2 
   4  -2 -16 113.235 29.5112   1 
   4   2 -16 128.939 27.5611   1 
  -4   2  16 117.851 28.4899   3 
   4   2 -16 126.501 23.7406   3 
  -2  -2  16 81.9754 40.6755   2 
   2  -2 -16 86.0626 27.7808   1 
   2   2 -16 84.0157 22.3807   1 
   2   2 -16 72.7637 21.6591   3 
  -2   2  16 71.4100 26.3963   3 
   0  -2 -16 32.8030 23.2203   1 
   0   2 -16 81.8717 22.4958   3 
   0   2  16 60.5447 25.0079   3 
   0   2 -16 73.7035 20.9443   1 
  -2  -2 -16 4.47079 18.9512   1 
  -2   2 -16 21.1297 19.6394   3 
  -2   2 -16 4.63199 15.9572   1 
   2   2  16 -4.6173 18.4708   3 
  -4  -2 -16 153.919 32.6166   1 
  -4   2 -16 150.849 28.9022   1 
   4   2  16 65.1314 28.3401   3 
  -9  -3  16 -11.747 20.1399   3 
  -9  -3  16 20.9092 24.7321   2 
   9  -3 -16 5.10459 33.7330   1 
   9   3 -16 -3.7634 32.0453   1 
  -9   3  16 -11.876 18.6592   3 
   7  -3 -16 123.072 34.3018   1 
  -7  -3  16 191.538 38.1259   2 
   7   3 -16 183.976 34.8433   1 
   7   3 -16 159.734 25.2436   3 
  -7   3  16 201.276 33.3435   3 
  -5  -3  16 49.4786 26.7571   2 
   5  -3 -16 -13.054 22.7081   1 
   5   3 -16 19.2880 17.9271   3 
   5   3 -16 26.2117 20.1890   1 
  -5   3  16 -0.0991 23.0850   3 
  -3  -3  16 61.0855 29.5721   2 
   3  -3 -16 -3.7499 21.0196   1 
   3   3 -16 -7.1733 16.8923   3 
   3   3 -16 16.3878 16.8051   1 
  -3   3  16 -23.023 18.1181   3 
  -1  -3  16 16.8078 31.7964   2 
   1  -3 -16 4.59226 21.1214   1 
   1   3 -16 34.3822 18.4310   3 
  -1   3  16 31.7771 22.2376   3 
   1   3 -16 34.0273 16.6015   1 
   1  -3  16 35.5136 36.6653   2 
  -1  -3 -16 94.8048 29.5150   1 
  -1   3 -16 84.6068 24.5455   3 
   1   3  16 143.045 30.8316   3 
  -3  -3 -16 177.545 35.6043   1 
   3  -3  16 145.495 46.9707   2 
  -3   3 -16 179.723 31.4492   3 
   3   3  16 139.486 31.4670   3 
  -5  -3 -16 43.9545 25.4316   1 
   5   3  16 -5.3959 21.5964   3 
  -5   3 -16 7.20281 22.8284   3 
 -10  -4  16 -17.788 23.6517   2 
  -8  -4  16 33.2008 26.7580   2 
   8  -4 -16 44.6214 30.6829   1 
  -8   4  16 -5.5646 19.1391   3 
   8   4 -16 31.1121 30.5012   1 
   8   4 -16 13.1388 17.3309   3 
   6  -4 -16 190.058 39.6663   1 
  -6  -4  16 370.553 45.1804   2 
  -6   4  16 349.604 38.8272   3 
   6   4 -16 337.589 34.0043   3 
  -4  -4  16 27.0079 28.4866   2 
   4  -4 -16 12.3836 23.3494   1 
  -4   4  16 2.28399 21.0822   3 
   4   4 -16 1.95109 17.4299   3 
  -2  -4  16 193.260 42.8431   2 
   2  -4 -16 167.832 33.2373   1 
  -2   4  16 248.960 37.2106   3 
   0  -4 -16 59.1117 25.2507   1 
   0  -4  16 64.6199 38.9659   2 
   0   4 -16 42.3068 21.3289   3 
   0   4  16 95.6736 29.1170   3 
  -2  -4 -16 7.91725 21.3990   1 
   2  -4  16 -21.554 36.9200   2 
  -2   4 -16 14.6881 19.6538   3 
   2   4  16 33.9870 25.8931   3 
  -4  -4 -16 45.4567 28.4019   1 
   4  -4  16 41.0168 40.0020   2 
  -4   4 -16 50.5694 25.4411   3 
   4   4  16 69.3892 26.2135   3 
  -9  -5  16 74.9101 32.7740   2 
   9  -5 -16 -3.5431 30.5236   1 
  -9   5  16 45.7800 24.8012   3 
   9   5 -16 4.79787 18.3543   3 
  -7  -5  16 53.2431 29.9534   2 
   7  -5 -16 11.2385 26.8879   1 
   7   5 -16 45.5766 20.5450   3 
  -7   5  16 55.6631 26.5895   3 
   5  -5 -16 -28.662 22.0660   1 
  -5  -5  16 58.9871 30.9352   2 
   5   5 -16 11.1410 17.1182   3 
  -5   5  16 19.1427 22.4223   3 
  -3  -5  16 121.936 40.6427   2 
   3  -5 -16 28.9156 23.8006   1 
  -3   5  16 79.8392 28.3354   3 
   3   5 -16 65.9386 21.7739   3 
   1  -5 -16 124.373 32.3537   1 
  -1  -5  16 113.632 43.6389   2 
   1   5 -16 127.493 26.6421   3 
  -1   5  16 139.655 32.9559   3 
  -1  -5 -16 11.9175 23.9710   1 
   1  -5  16 -6.6039 40.1824   2 
  -1   5 -16 31.7349 22.5710   3 
   1   5  16 36.3918 25.1604   3 
   3  -5  16 257.349 58.2416   2 
  -3  -5 -16 263.459 41.8786   1 
   3   5  16 268.920 41.7445   3 
  -3   5 -16 312.458 36.4843   3 
   8  -6 -16 7.68333 32.6802   1 
  -8  -6  16 89.9776 36.4573   2 
  -8   6  16 -16.737 20.3004   3 
   8   6 -16 -11.111 17.1421   3 
  -6  -6  16 53.5356 33.1180   2 
   6  -6 -16 92.8164 32.7033   1 
  -6   6  16 90.1049 30.7654   3 
   6   6 -16 89.1151 22.0998   3 
  -4  -6  16 72.7702 36.8994   2 
   4  -6 -16 46.8878 26.8844   1 
   4   6 -16 27.0170 20.0764   3 
  -4   6  16 109.124 31.3454   3 
   2  -6 -16 33.3306 25.8361   1 
  -2  -6  16 -4.0215 36.3208   2 
   2   6 -16 56.7304 22.5223   3 
  -2   6  16 21.8424 26.2551   3 
   0  -6 -16 -1.4399 21.4053   1 
   0  -6  16 25.0182 42.4622   2 
   0   6  16 43.3087 25.1185   3 
   0   6 -16 51.5035 23.0272   3 
   2  -6  16 32.1227 47.0570   2 
  -2  -6 -16 -8.3512 23.4199   1 
   2   6  16 3.48387 21.4180   3 
  -2   6 -16 -5.3441 19.1175   3 
   7  -7 -16 104.477 34.4581   1 
  -7  -7  16 110.238 39.6170   2 
   7   7 -16 39.8150 20.9996   3 
  -7   7  16 49.2001 29.3922   3 
  -5  -7  16 59.5608 35.6808   2 
   5  -7 -16 48.7938 27.8203   1 
  -5   7  16 51.9801 26.0665   3 
   5   7 -16 47.9636 21.7363   3 
   3  -7 -16 37.6740 25.5215   1 
  -3  -7  16 67.7138 42.0229   2 
   3   7 -16 27.3433 21.5617   3 
  -3   7  16 55.2686 27.7129   3 
   1  -7 -16 54.8617 30.8262   1 
  -1  -7  16 25.5534 44.0099   2 
  -1   7  16 100.284 31.4782   3 
   1   7 -16 62.0155 25.2126   3 
   1  -7  16 -7.4220 47.5744   2 
  -1  -7 -16 -24.847 21.2195   1 
   1   7  16 17.4647 25.6148   3 
  -1   7 -16 25.7685 22.0751   3 
   4  -8 -16 16.7581 25.3888   1 
  -4  -8  16 21.6374 40.1638   2 
   4   8 -16 -1.0398 19.4400   3 
  -4   8  16 10.0425 28.5919   3 
  -2  -8  16 14.9929 48.0488   2 
   2  -8 -16 63.8031 29.8398   1 
   2   8 -16 53.5631 24.8695   3 
  -2   8  16 -25.332 26.1028   3 
   0  -8  16 -44.108 44.5603   2 
   0   8  16 -41.869 23.2734   3 
   0   8 -16 48.2227 24.5145   3 
  -8   0  17 290.826 41.3834   3 
   8   0 -17 210.053 44.7179   1 
  -6   0  17 200.254 36.9282   3 
   6   0 -17 187.971 37.1842   1 
  -4   0  17 28.7785 24.9448   3 
   4   0 -17 13.6964 23.3745   1 
   2   0 -17 110.287 27.8802   1 
  -2   0  17 51.6724 28.1776   3 
   0   0 -17 24.8134 20.6097   1 
   0   0  17 57.8518 26.7657   3 
  -2   0 -17 156.358 31.0868   1 
   2   0  17 161.692 34.3797   3 
   4   0  17 346.810 50.2601   3 
  -4   0 -17 418.926 42.4981   1 
   9  -1 -17 25.1614 32.1633   1 
  -9  -1  17 61.6676 27.6381   3 
  -9   1  17 54.3922 24.0664   3 
   9   1 -17 46.2510 33.6281   1 
   7  -1 -17 43.7374 32.6340   1 
  -7  -1  17 79.7158 28.7504   3 
   7   1 -17 77.9711 31.6470   1 
  -7   1  17 68.9135 24.5895   3 
  -5  -1  17 30.9668 24.2165   3 
   5  -1 -17 87.7394 28.9503   1 
  -5   1  17 35.4323 23.8722   3 
   5   1 -17 60.8156 26.4561   1 
   3  -1 -17 154.743 32.0036   1 
  -3  -1  17 216.384 37.4274   3 
  -3   1  17 170.300 33.9192   3 
   3   1 -17 223.409 34.5748   1 
  -1  -1  17 27.0653 26.1157   3 
   1  -1 -17 44.8480 25.2882   1 
  -1   1  17 27.7304 22.3336   3 
   1   1 -17 19.0142 19.2560   1 
   1  -1  17 148.635 35.6791   3 
  -1  -1 -17 169.922 32.4621   1 
  -1   1 -17 138.715 29.6085   1 
   1   1  17 91.3973 32.3554   3 
  -3  -1 -17 33.5968 23.4948   1 
   3  -1  17 62.2571 30.1200   3 
  -3   1 -17 85.5514 26.1365   1 
   3   1  17 46.2050 26.3676   3 
  -8  -2  17 89.7848 28.8994   3 
   8  -2 -17 -0.2025 25.9060   1 
   8   2 -17 49.5515 32.5608   1 
  -8   2  17 15.6808 21.7518   3 
  -6  -2  17 36.6321 22.1315   3 
   6  -2 -17 58.6637 31.1743   1 
  -6   2  17 36.4445 24.0196   3 
   6   2 -17 69.7020 28.3320   1 
   4  -2 -17 33.3747 24.0207   1 
   4   2 -17 28.3398 19.7950   1 
  -4   2  17 13.6608 19.8943   3 
   4   2 -17 10.7797 18.4599   3 
   2  -2 -17 79.3038 27.6218   1 
   2   2 -17 113.184 24.1634   3 
   2   2 -17 80.7136 22.1429   1 
  -2   2  17 88.6445 28.5754   3 
   0  -2 -17 275.768 39.2076   1 
   0   2  17 225.012 38.7567   3 
   0   2 -17 256.172 33.3869   1 
   0   2 -17 266.222 35.6094   3 
  -2  -2 -17 -4.5917 21.2443   1 
  -2   2 -17 47.9305 20.3592   1 
   2   2  17 -35.778 21.5772   3 
  -4  -2 -17 303.495 44.6368   1 
   4  -2  17 327.218 46.7913   3 
   4   2  17 217.649 38.7823   3 
  -9  -3  17 78.2660 28.2680   3 
  -9  -3  17 33.8646 25.0526   2 
   9  -3 -17 52.0904 38.2261   1 
   9   3 -17 26.1236 34.7622   1 
  -9   3  17 14.0312 22.2863   3 
   7  -3 -17 36.8346 29.0063   1 
  -7  -3  17 24.1178 25.7307   2 
   7   3 -17 45.2143 26.5940   1 
  -7   3  17 -27.158 17.7805   3 
   5  -3 -17 16.9220 24.5166   1 
  -5  -3  17 32.7673 29.7595   2 
   5   3 -17 49.9229 21.7701   1 
   5   3 -17 1.69903 17.8894   3 
  -5   3  17 -7.9500 21.3802   3 
   3  -3 -17 37.9992 25.1749   1 
   3   3 -17 50.0502 31.0076   1 
   3   3 -17 45.5710 22.0321   3 
  -3   3  17 1.32246 24.6363   3 
   1  -3 -17 -2.8383 20.1810   1 
  -1   3  17 17.0916 23.0638   3 
   1   3 -17 -27.419 16.5794   3 
  -1  -3 -17 47.6221 27.1878   1 
   1   3  17 7.19993 22.6180   3 
  -1   3 -17 46.6482 22.8906   3 
  -3  -3 -17 59.1279 28.2250   1 
   3   3  17 -34.861 21.0051   3 
  -3   3 -17 24.9495 21.6420   3 
   8  -4 -17 46.5116 33.3904   1 
  -8  -4  17 76.1480 33.3427   2 
   8   4 -17 33.6162 19.7052   3 
  -8   4  17 35.3566 23.9366   3 
   6  -4 -17 46.9399 28.6284   1 
  -6  -4  17 90.9744 30.6753   2 
  -6   4  17 51.8030 25.7780   3 
   6   4 -17 36.1792 20.5897   3 
   4  -4 -17 9.04791 22.8115   1 
  -4  -4  17 0.36948 24.8957   2 
  -4   4  17 -0.0159 22.6884   3 
   4   4 -17 -5.0783 17.0419   3 
   2  -4 -17 97.3770 31.4738   1 
  -2  -4  17 80.3543 36.2307   2 
  -2   4  17 85.9819 28.3237   3 
   2   4 -17 76.9161 23.9397   3 
   0  -4 -17 0.88195 21.5547   1 
   0  -4  17 5.59272 36.5718   2 
   0   4  17 67.8412 29.1404   3 
   0   4 -17 27.9362 22.0714   3 
  -2  -4 -17 59.9188 28.5719   1 
   2   4  17 57.2731 27.3845   3 
  -2   4 -17 82.8319 27.6825   3 
   7  -5 -17 11.7191 27.8785   1 
  -7  -5  17 86.7631 33.0926   2 
   7   5 -17 50.1527 21.6559   3 
  -7   5  17 48.7751 27.0308   3 
  -5  -5  17 102.504 33.7643   2 
   5  -5 -17 18.6098 27.6418   1 
   5   5 -17 -0.5036 17.7612   3 
  -5   5  17 -24.119 19.8809   3 
   3  -5 -17 46.7589 26.3282   1 
  -3  -5  17 64.4927 35.7722   2 
   3   5 -17 29.3020 20.3442   3 
  -3   5  17 96.9463 29.0358   3 
   1  -5 -17 13.1547 25.3467   1 
  -1  -5  17 26.2880 37.9866   2 
  -1   5  17 15.1256 25.3564   3 
   1   5 -17 -7.1764 18.0796   3 
   1  -5  17 -37.309 39.7739   2 
  -1  -5 -17 -1.6241 25.0087   1 
   1   5  17 -8.0467 25.1372   3 
  -1   5 -17 54.0678 23.3446   3 
  -3   5 -17 -17.836 22.8286   3 
  -6  -6  17 96.2866 35.4488   2 
   6  -6 -17 69.4811 30.9832   1 
   6   6 -17 46.5339 20.9507   3 
  -6   6  17 101.810 30.8151   3 
  -4  -6  17 69.8375 36.7933   2 
   4  -6 -17 9.19836 25.3760   1 
  -4   6  17 37.2294 27.3694   3 
   4   6 -17 -13.405 18.9436   3 
   2  -6 -17 49.7174 27.6667   1 
  -2  -6  17 90.9966 42.7462   2 
   2   6 -17 68.0923 24.8060   3 
  -2   6  17 36.5609 27.9378   3 
   0  -6  17 55.0109 45.0860   2 
   0  -6 -17 22.7599 23.7601   1 
   0   6  17 127.588 33.1472   3 
   0   6 -17 100.673 26.7590   3 
  -5  -7  17 51.5318 34.6756   2 
   5   7 -17 13.7662 20.7674   3 
  -5   7  17 65.8234 31.3864   3 
  -3  -7  17 92.6303 44.0291   2 
   3  -7 -17 46.8755 28.0934   1 
   3   7 -17 48.4078 23.7706   3 
  -3   7  17 53.0050 28.1966   3 
  -1  -7  17 -21.963 41.5260   2 
   1  -7 -17 28.0681 26.8917   1 
  -1   7  17 8.92764 25.3770   3 
   1   7 -17 10.3322 22.5527   3 
   8   0 -18 180.025 39.6513   1 
  -8   0  18 306.218 43.6537   3 
   6   0 -18 16.1318 27.1320   1 
  -6   0  18 40.6658 28.2640   3 
  -4   0  18 42.3396 26.9893   3 
   4   0 -18 8.52727 21.2438   1 
   2   0 -18 759.053 57.4237   1 
  -2   0  18 812.690 64.2132   3 
   0   0  18 136.670 35.3052   3 
   0   0 -18 122.001 30.4250   1 
   2   0  18 72.5208 31.8653   3 
  -2   0 -18 112.915 29.5277   1 
  -7  -1  18 93.4604 32.6504   3 
   7  -1 -18 85.9711 34.1121   1 
  -7   1  18 123.906 32.9182   3 
   7   1 -18 121.525 33.9500   1 
   5  -1 -18 21.5197 24.4584   1 
  -5  -1  18 59.7929 27.1788   3 
  -5   1  18 75.9231 28.1828   3 
   5   1 -18 22.1562 23.8773   1 
   3  -1 -18 83.3022 28.3044   1 
  -3  -1  18 61.2151 28.1107   3 
   3   1 -18 56.1191 24.2265   1 
  -3   1  18 129.347 33.3102   3 
  -1  -1  18 70.8053 31.6418   3 
   1  -1 -18 109.352 29.1351   1 
  -1   1  18 58.2751 27.1498   3 
   1   1 -18 121.682 26.5816   1 
  -1  -1 -18 50.2060 26.1669   1 
   1  -1  18 91.3995 34.0313   3 
  -1   1 -18 76.3200 25.1852   1 
   1   1  18 57.4160 29.2458   3 
   3  -1  18 109.796 33.0748   3 
   3   1  18 32.0567 28.8156   3 
  -8  -2  18 70.3546 27.8381   3 
   8  -2 -18 60.1479 36.2777   1 
  -8   2  18 8.55992 23.8481   3 
   8   2 -18 30.5619 30.6652   1 
   6  -2 -18 -21.706 22.9078   1 
  -6  -2  18 -29.253 21.2358   3 
  -6   2  18 16.3358 24.7655   3 
   6   2 -18 13.5074 23.7307   1 
  -4  -2  18 81.4994 31.7705   3 
   4  -2 -18 67.4571 27.3469   1 
   4   2 -18 66.0539 25.0260   1 
  -4   2  18 75.5442 25.8951   3 
   2  -2 -18 279.261 39.3593   1 
  -2   2  18 275.572 40.8786   3 
   2   2 -18 286.773 36.8124   1 
   0  -2 -18 152.981 32.7827   1 
   0   2 -18 168.425 42.1027   1 
   0   2  18 164.180 37.2372   3 
  -2  -2 -18 223.470 38.5385   1 
   2  -2  18 188.649 39.2127   3 
   2   2  18 191.836 40.0361   3 
   7  -3 -18 19.7343 31.7335   1 
  -7  -3  18 -4.9006 23.4103   3 
  -7   3  18 18.1999 22.2649   3 
   5  -3 -18 61.9151 27.8691   1 
   5   3 -18 -31.747 16.6316   3 
  -5   3  18 0.71738 25.6023   3 
   3  -3 -18 21.5126 24.2599   1 
   3   3 -18 3.44791 20.3453   3 
  -3   3  18 30.4630 25.4498   3 
   1  -3 -18 62.1299 26.9113   1 
   1   3 -18 24.9437 21.3293   3 
  -1   3  18 -3.0936 24.7026   3 
  -1  -3 -18 9.03268 22.2719   1 
  -1   3 -18 17.8899 20.9330   3 
   1   3  18 -26.171 23.6937   3 
   6  -4 -18 -1.1960 27.9694   1 
  -6   4  18 55.2191 27.6327   3 
   6   4 -18 42.7670 22.3545   3 
   4  -4 -18 -2.4976 22.3109   1 
  -4   4  18 18.8724 25.4057   3 
   4   4 -18 -10.966 18.0863   3 
  -2   4  18 596.208 54.2011   3 
   2   4 -18 550.925 47.4629   3 
   0  -4 -18 56.0788 27.0219   1 
   0   4  18 23.8094 24.9899   3 
   0   4 -18 5.68749 23.9780   3 
  -5  -5  18 71.3399 30.5298   2 
   5  -5 -18 40.5633 30.4976   1 
  -5   5  18 43.0505 28.3923   3 
   5   5 -18 20.0575 20.1868   3 
  -3  -5  18 73.8508 36.6233   2 
   3  -5 -18 29.2751 26.8822   1 
   3   5 -18 30.3580 22.6863   3 
  -3   5  18 96.9320 30.1248   3 
   1  -5 -18 77.2858 29.9810   1 
  -1  -5  18 10.7583 55.7096   2 
  -1   5  18 58.1196 29.2893   3 
   1   5 -18 59.5875 24.3202   3 
  -4  -6  18 24.3607 33.1396   2 
   4   6 -18 23.7083 21.8309   3 
  -4   6  18 50.2908 29.4401   3 
  -2  -6  18 120.974 44.5608   2 
  -2   6  18 98.1968 35.0333   3 
   2   6 -18 96.7097 27.3803   3 
  -6   0  19 31.8480 30.0342   3 
   6   0 -19 32.2101 26.3710   1 
  -4   0  19 222.699 42.0239   3 
   4   0 -19 129.056 31.4368   1 
   2   0 -19 159.877 34.0105   1 
  -2   0  19 170.571 39.0475   3 
   0   0  19 8.20693 29.6898   3 
   0   0 -19 35.9361 24.9372   1 
  -7  -1  19 70.4889 32.0461   3 
  -7   1  19 75.6030 31.5084   3 
  -5  -1  19 68.3530 29.9204   3 
   5  -1 -19 58.5498 28.2165   1 
   5   1 -19 75.0253 28.8617   1 
  -5   1  19 47.9622 28.1737   3 
  -3  -1  19 29.6875 26.8085   3 
   3  -1 -19 17.5453 24.6576   1 
  -3   1  19 57.3616 29.8193   3 
   3   1 -19 65.6447 25.5953   1 
  -1  -1  19 173.349 38.8161   3 
   1  -1 -19 144.534 32.9258   1 
   1   1 -19 184.687 31.7687   1 
  -1   1  19 81.5851 33.2698   3 
   1  -1  19 28.9504 28.4606   3 
   1   1  19 -14.441 26.2403   3 
   6  -2 -19 90.6432 32.7039   1 
  -6  -2  19 89.4025 31.8080   3 
  -6   2  19 74.7724 30.0362   3 
   6   2 -19 45.7194 25.7921   1 
  -4  -2  19 97.8685 36.4322   3 
   4  -2 -19 51.3350 30.2175   1 
  -4   2  19 23.0369 26.8159   3 
   4   2 -19 77.4141 29.8202   1 
  -2  -2  19 24.3673 30.6410   3 
   2  -2 -19 15.5634 25.2105   1 
  -2   2  19 74.6410 28.3625   3 
   0  -2  19 -6.8328 26.1720   3 
   0   2  19 20.3130 26.5264   3 
   5  -3 -19 16.0032 26.0276   1 
  -5   3  19 8.26626 29.3538   3 
   3  -3 -19 -23.153 24.4426   1 
  -3   3  19 -21.628 21.2263   3 
   3   3 -19 -40.031 17.8655   3 
  -1   3  19 22.4794 28.1021   3 
   1   3 -19 10.0878 22.6914   3 
   4   4 -19 116.758 27.5484   3 
  -4   4  19 182.448 38.2806   3 
  -2   4  19 156.817 38.3383   3 
   2   4 -19 117.813 29.2975   3 
   0   0   0    0.00    0.00   0 
  
 _exptl_absorpt_process_details 'SADABS 2014/5' 
 _exptl_absorpt_correction_type   multi-scan 
 _exptl_absorpt_correction_T_max  0.6467 
 _exptl_absorpt_correction_T_min  0.4619 
 _exptl_special_details 
) 
 The following wavelength and cell were deduced by SADABS from the 
 direction cosines etc. They are given here for emergency use only: 
 CELL 0.71060   11.408   11.393   15.382   90.349  102.196   89.983 
) 
  
; 
_shelx_hkl_checksum   57305 
  
